# Supplementary material for: Copy number variants and fixed duplications among 198 rhesus macaques (Macaca mulatta)
Source: PLoS Genet. 2020 May 11;16(5):e1008742. doi: 10.1371/journal.pgen.1008742 (PMC7241854; doi:10.1371/journal.pgen.1008742)
Supplement: S3 Table — (XLSX) [file pgen.1008742.s003.xlsx]

## Sheet: One-to-one orthologous pairs wi
Human Ensembl ID	Human Gene	Human Gene Description	Rhesus Ensembl ID	Rhesus Gene	Rhesus Gene Description	Human Copy-number Profile	Rhesus Copy-number Profile
ENSG00000198763	MT-ND2	mitochondrially encoded NADH dehydrogenase 2 [Source:HGNC Symbol;Acc:7456]	ENSMMUG00000028695	ND2	NADH dehydrogenase subunit 2 (mitochondrion) [Source:RefSeq peptide;Acc:YP_026105]	Diploid	Diploid
ENSG00000198804	MT-CO1	mitochondrially encoded cytochrome c oxidase I [Source:HGNC Symbol;Acc:7419]	ENSMMUG00000028689	COX1	cytochrome c oxidase subunit I (mitochondrion) [Source:RefSeq peptide;Acc:YP_026106]	Diploid	Diploid
ENSG00000198712	MT-CO2	mitochondrially encoded cytochrome c oxidase II [Source:HGNC Symbol;Acc:7421]	ENSMMUG00000028686	MT-CO2	mitochondrially encoded cytochrome c oxidase II [Source:HGNC Symbol;Acc:HGNC:7421]	Diploid	Diploid
ENSG00000228253	MT-ATP8	mitochondrially encoded ATP synthase 8 [Source:HGNC Symbol;Acc:7415]	ENSMMUG00000028684	MT-ATP8	mitochondrially encoded ATP synthase 8 [Source:HGNC Symbol;Acc:HGNC:7415]	Diploid	Diploid
ENSG00000198899	MT-ATP6	mitochondrially encoded ATP synthase 6 [Source:HGNC Symbol;Acc:7414]	ENSMMUG00000028683	MT-ATP6	mitochondrially encoded ATP synthase 6 [Source:HGNC Symbol;Acc:HGNC:7414]	Diploid	Diploid
ENSG00000198938	MT-CO3	mitochondrially encoded cytochrome c oxidase III [Source:HGNC Symbol;Acc:7422]	ENSMMUG00000028682	MT-CO3	mitochondrially encoded cytochrome c oxidase III [Source:HGNC Symbol;Acc:HGNC:7422]	Diploid	Diploid
ENSG00000198840	MT-ND3	mitochondrially encoded NADH dehydrogenase 3 [Source:HGNC Symbol;Acc:7458]	ENSMMUG00000028680	ND3	NADH dehydrogenase subunit 3 (mitochondrion) [Source:RefSeq peptide;Acc:YP_026111]	Diploid	Diploid
ENSG00000212907	MT-ND4L	mitochondrially encoded NADH dehydrogenase 4L [Source:HGNC Symbol;Acc:7460]	ENSMMUG00000028678	MT-ND4L	mitochondrially encoded NADH:ubiquinone oxidoreductase core subunit 4L [Source:HGNC Symbol;Acc:HGNC:7460]	Diploid	Diploid
ENSG00000198886	MT-ND4	mitochondrially encoded NADH dehydrogenase 4 [Source:HGNC Symbol;Acc:7459]	ENSMMUG00000028677	MT-ND4	mitochondrially encoded NADH:ubiquinone oxidoreductase core subunit 4 [Source:HGNC Symbol;Acc:HGNC:7459]	Diploid	Diploid
ENSG00000198786	MT-ND5	mitochondrially encoded NADH dehydrogenase 5 [Source:HGNC Symbol;Acc:7461]	ENSMMUG00000028673	MT-ND5	mitochondrially encoded NADH:ubiquinone oxidoreductase core subunit 5 [Source:HGNC Symbol;Acc:HGNC:7461]	Diploid	Diploid
ENSG00000198695	MT-ND6	mitochondrially encoded NADH dehydrogenase 6 [Source:HGNC Symbol;Acc:7462]	ENSMMUG00000028672	MT-ND6	mitochondrially encoded NADH:ubiquinone oxidoreductase core subunit 6 [Source:HGNC Symbol;Acc:HGNC:7462]	Diploid	Diploid
ENSG00000198727	MT-CYB	mitochondrially encoded cytochrome b [Source:HGNC Symbol;Acc:7427]	ENSMMUG00000028670	MT-CYB	mitochondrially encoded cytochrome b [Source:HGNC Symbol;Acc:HGNC:7427]	Diploid	Diploid
ENSG00000198960	ARMCX6	armadillo repeat containing, X-linked 6 [Source:HGNC Symbol;Acc:26094]	ENSMMUG00000032394	ARMCX6	armadillo repeat containing, X-linked 6 [Source:HGNC Symbol;Acc:HGNC:26094]	Diploid	Diploid
ENSG00000204576	PRR3	proline rich 3 [Source:HGNC Symbol;Acc:21149]	ENSMMUG00000013893	PRR3	proline rich 3 [Source:HGNC Symbol;Acc:HGNC:21149]	Diploid	Diploid
ENSG00000169427	KCNK9	potassium channel, subfamily K, member 9 [Source:HGNC Symbol;Acc:6283]	ENSMMUG00000005826	KCNK9	potassium two pore domain channel subfamily K member 9 [Source:HGNC Symbol;Acc:HGNC:6283]	Diploid	Diploid
ENSG00000165215	CLDN3	claudin 3 [Source:HGNC Symbol;Acc:2045]	ENSMMUG00000001143	CLDN3	claudin 3 [Source:HGNC Symbol;Acc:HGNC:2045]	Diploid	Diploid
ENSG00000152359	POC5	POC5 centriolar protein [Source:HGNC Symbol;Acc:26658]	ENSMMUG00000006146	POC5	POC5 centriolar protein [Source:HGNC Symbol;Acc:HGNC:26658]	Diploid	Diploid
ENSG00000129351	ILF3	interleukin enhancer binding factor 3, 90kDa [Source:HGNC Symbol;Acc:6038]	ENSMMUG00000014673	ILF3	interleukin enhancer binding factor 3 [Source:HGNC Symbol;Acc:HGNC:6038]	Diploid	Diploid
ENSG00000135900	MRPL44	mitochondrial ribosomal protein L44 [Source:HGNC Symbol;Acc:16650]	ENSMMUG00000006160	MRPL44	mitochondrial ribosomal protein L44 [Source:HGNC Symbol;Acc:HGNC:16650]	Diploid	Diploid
ENSG00000173976	RAX2	retina and anterior neural fold homeobox 2 [Source:HGNC Symbol;Acc:18286]	ENSMMUG00000047828	RAX2	retina and anterior neural fold homeobox 2 [Source:HGNC Symbol;Acc:HGNC:18286]	Diploid	Diploid
ENSG00000179921	GPBAR1	G protein-coupled bile acid receptor 1 [Source:HGNC Symbol;Acc:19680]	ENSMMUG00000022811	GPBAR1	G protein-coupled bile acid receptor 1 [Source:HGNC Symbol;Acc:HGNC:19680]	Diploid	Diploid
ENSG00000168229	PTGDR	prostaglandin D2 receptor (DP) [Source:HGNC Symbol;Acc:9591]	ENSMMUG00000000024	PTGDR	prostaglandin D2 receptor [Source:HGNC Symbol;Acc:HGNC:9591]	Diploid	Diploid
ENSG00000112214	FHL5	four and a half LIM domains 5 [Source:HGNC Symbol;Acc:17371]	ENSMMUG00000012621	FHL5	four and a half LIM domains 5 [Source:HGNC Symbol;Acc:HGNC:17371]	Diploid	Diploid
ENSG00000187189	TSPYL4	TSPY-like 4 [Source:HGNC Symbol;Acc:21559]	ENSMMUG00000014643	TSPYL4	TSPY like 4 [Source:HGNC Symbol;Acc:HGNC:21559]	Diploid	Diploid
ENSG00000105464	GRIN2D	glutamate receptor, ionotropic, N-methyl D-aspartate 2D [Source:HGNC Symbol;Acc:4588]	ENSMMUG00000005983	GRIN2D	glutamate ionotropic receptor NMDA type subunit 2D [Source:HGNC Symbol;Acc:HGNC:4588]	Diploid	Diploid
ENSG00000107833	NPM3	nucleophosmin/nucleoplasmin 3 [Source:HGNC Symbol;Acc:7931]	ENSMMUG00000015774	NPM3	nucleophosmin/nucleoplasmin 3 [Source:HGNC Symbol;Acc:HGNC:7931]	Diploid	Diploid
ENSG00000158571	PFKFB1	6-phosphofructo-2-kinase/fructose-2,6-biphosphatase 1 [Source:HGNC Symbol;Acc:8872]	ENSMMUG00000008425	PFKFB1	6-phosphofructo-2-kinase/fructose-2,6-biphosphatase 1 [Source:HGNC Symbol;Acc:HGNC:8872]	Diploid	Diploid
ENSG00000141574	SECTM1	secreted and transmembrane 1 [Source:HGNC Symbol;Acc:10707]	ENSMMUG00000016897	SECTM1	secreted and transmembrane 1 [Source:HGNC Symbol;Acc:HGNC:10707]	Diploid	Diploid
ENSG00000125384	PTGER2	prostaglandin E receptor 2 (subtype EP2), 53kDa [Source:HGNC Symbol;Acc:9594]	ENSMMUG00000000023	PTGER2	prostaglandin E receptor 2 [Source:HGNC Symbol;Acc:HGNC:9594]	Diploid	Diploid
ENSG00000133275	CSNK1G2	casein kinase 1, gamma 2 [Source:HGNC Symbol;Acc:2455]	ENSMMUG00000006620	CSNK1G2	casein kinase 1 gamma 2 [Source:HGNC Symbol;Acc:HGNC:2455]	Diploid	Diploid
ENSG00000164694	FNDC1	fibronectin type III domain containing 1 [Source:HGNC Symbol;Acc:21184]	ENSMMUG00000000500	FNDC1	fibronectin type III domain containing 1 [Source:HGNC Symbol;Acc:HGNC:21184]	Diploid	Diploid
ENSG00000204590	GNL1	guanine nucleotide binding protein-like 1 [Source:HGNC Symbol;Acc:4413]	ENSMMUG00000020077	GNL1	G protein nucleolar 1 (putative) [Source:HGNC Symbol;Acc:HGNC:4413]	Diploid	Diploid
ENSG00000152936	IFLTD1	intermediate filament tail domain containing 1 [Source:HGNC Symbol;Acc:26683]	ENSMMUG00000009601	LMNTD1	lamin tail domain containing 1 [Source:HGNC Symbol;Acc:HGNC:26683]	Diploid	Diploid
ENSG00000083307	GRHL2	grainyhead-like 2 (Drosophila) [Source:HGNC Symbol;Acc:2799]	ENSMMUG00000020995	GRHL2	grainyhead like transcription factor 2 [Source:HGNC Symbol;Acc:HGNC:2799]	Diploid	Diploid
ENSG00000164292	RHOBTB3	Rho-related BTB domain containing 3 [Source:HGNC Symbol;Acc:18757]	ENSMMUG00000021165	RHOBTB3	Rho related BTB domain containing 3 [Source:HGNC Symbol;Acc:HGNC:18757]	Diploid	Diploid
ENSG00000229937	PRPS1L1	phosphoribosyl pyrophosphate synthetase 1-like 1 [Source:HGNC Symbol;Acc:9463]	ENSMMUG00000004674	PRPS1	phosphoribosyl pyrophosphate synthetase 1 [Source:HGNC Symbol;Acc:HGNC:9462]	Diploid	Diploid
ENSG00000167103	PIP5KL1	phosphatidylinositol-4-phosphate 5-kinase-like 1 [Source:HGNC Symbol;Acc:28711]	ENSMMUG00000031631	PIP5KL1	phosphatidylinositol-4-phosphate 5-kinase like 1 [Source:HGNC Symbol;Acc:HGNC:28711]	Diploid	Diploid
ENSG00000011260	UTP18	UTP18 small subunit (SSU) processome component homolog (yeast) [Source:HGNC Symbol;Acc:24274]	ENSMMUG00000007858	UTP18	UTP18, small subunit processome component [Source:HGNC Symbol;Acc:HGNC:24274]	Diploid	Diploid
ENSG00000070413	DGCR2	DiGeorge syndrome critical region gene 2 [Source:HGNC Symbol;Acc:2845]	ENSMMUG00000019925	DGCR2	DiGeorge syndrome critical region gene 2 [Source:HGNC Symbol;Acc:HGNC:2845]	Diploid	Diploid
ENSG00000188747	NOXA1	NADPH oxidase activator 1 [Source:HGNC Symbol;Acc:10668]	ENSMMUG00000019602	NOXA1	NADPH oxidase activator 1 [Source:HGNC Symbol;Acc:HGNC:10668]	Diploid	Diploid
ENSG00000136828	RALGPS1	Ral GEF with PH domain and SH3 binding motif 1 [Source:HGNC Symbol;Acc:16851]	ENSMMUG00000023495	RALGPS1	Ral GEF with PH domain and SH3 binding motif 1 [Source:HGNC Symbol;Acc:HGNC:16851]	Diploid	Diploid
ENSG00000164048	ZNF589	zinc finger protein 589 [Source:HGNC Symbol;Acc:16747]	ENSMMUG00000021607	ZNF589	zinc finger protein 589 [Source:HGNC Symbol;Acc:HGNC:16747]	Diploid	Diploid
ENSG00000073464	CLCN4	chloride channel, voltage-sensitive 4 [Source:HGNC Symbol;Acc:2022]	ENSMMUG00000013635	CLCN4	chloride voltage-gated channel 4 [Source:HGNC Symbol;Acc:HGNC:2022]	Diploid	Diploid
ENSG00000171885	AQP4	aquaporin 4 [Source:HGNC Symbol;Acc:637]	ENSMMUG00000014934	AQP4	aquaporin 4 [Source:HGNC Symbol;Acc:HGNC:637]	Diploid	Diploid
ENSG00000164508	HIST1H2AA	histone cluster 1, H2aa [Source:HGNC Symbol;Acc:18729]	ENSMMUG00000039988	HIST1H2AA	histone cluster 1 H2A family member a [Source:HGNC Symbol;Acc:HGNC:18729]	Diploid	Diploid
ENSG00000165029	ABCA1	ATP-binding cassette, sub-family A (ABC1), member 1 [Source:HGNC Symbol;Acc:29]	ENSMMUG00000020608	ABCA1	ATP binding cassette subfamily A member 1 [Source:HGNC Symbol;Acc:HGNC:29]	Diploid	Diploid
ENSG00000146047	HIST1H2BA	histone cluster 1, H2ba [Source:HGNC Symbol;Acc:18730]	ENSMMUG00000038737	HIST1H2BA	histone cluster 1, H2ba [Source:HGNC Symbol;Acc:HGNC:18730]	Diploid	Diploid
ENSG00000112715	VEGFA	vascular endothelial growth factor A [Source:HGNC Symbol;Acc:12680]	ENSMMUG00000004577	VEGFA	vascular endothelial growth factor A [Source:HGNC Symbol;Acc:HGNC:12680]	Diploid	Diploid
ENSG00000204536	CCHCR1	coiled-coil alpha-helical rod protein 1 [Source:HGNC Symbol;Acc:13930]	ENSMMUG00000015679	CCHCR1	coiled-coil alpha-helical rod protein 1 [Source:HGNC Symbol;Acc:HGNC:13930]	Diploid	Diploid
ENSG00000167969	ECI1	enoyl-CoA delta isomerase 1 [Source:HGNC Symbol;Acc:2703]	ENSMMUG00000019237	ECI1	enoyl-CoA delta isomerase 1 [Source:HGNC Symbol;Acc:HGNC:2703]	Diploid	Diploid
ENSG00000172113	NME6	NME/NM23 nucleoside diphosphate kinase 6 [Source:HGNC Symbol;Acc:20567]	ENSMMUG00000003078	NME6	NME/NM23 nucleoside diphosphate kinase 6 [Source:HGNC Symbol;Acc:HGNC:20567]	Diploid	Diploid
ENSG00000128891	C15orf57	chromosome 15 open reading frame 57 [Source:HGNC Symbol;Acc:28295]	ENSMMUG00000001482	CCDC32	coiled-coil domain containing 32 [Source:HGNC Symbol;Acc:HGNC:28295]	Diploid	Diploid
ENSG00000189143	CLDN4	claudin 4 [Source:HGNC Symbol;Acc:2046]	ENSMMUG00000044653	CLDN4	claudin 4 [Source:HGNC Symbol;Acc:HGNC:2046]	Diploid	Diploid
ENSG00000111224	PARP11	poly (ADP-ribose) polymerase family, member 11 [Source:HGNC Symbol;Acc:1186]	ENSMMUG00000018273	PARP11	poly [Source:RefSeq peptide;Acc:NP_001252770]	Diploid	Diploid
ENSG00000237330	RNF223	ring finger protein 223 [Source:HGNC Symbol;Acc:40020]	ENSMMUG00000032293	RNF223	ring finger protein 223 [Source:HGNC Symbol;Acc:HGNC:40020]	Diploid	Diploid
ENSG00000101182	PSMA7	proteasome (prosome, macropain) subunit, alpha type, 7 [Source:HGNC Symbol;Acc:9536]	ENSMMUG00000018354	PSMA7	proteasome subunit alpha 7 [Source:HGNC Symbol;Acc:HGNC:9536]	Diploid	Diploid
ENSG00000085224	ATRX	alpha thalassemia/mental retardation syndrome X-linked [Source:HGNC Symbol;Acc:886]	ENSMMUG00000022574	ATRX	ATRX, chromatin remodeler [Source:HGNC Symbol;Acc:HGNC:886]	Diploid	Diploid
ENSG00000149922	TBX6	T-box 6 [Source:HGNC Symbol;Acc:11605]	ENSMMUG00000000981	TBX6	T-box 6 [Source:HGNC Symbol;Acc:HGNC:11605]	Diploid	Diploid
ENSG00000179476	C14orf28	chromosome 14 open reading frame 28 [Source:HGNC Symbol;Acc:19834]	ENSMMUG00000017677	C14orf28	chromosome 14 open reading frame 28 [Source:HGNC Symbol;Acc:HGNC:19834]	Diploid	Diploid
ENSG00000206557	TRIM71	tripartite motif containing 71, E3 ubiquitin protein ligase [Source:HGNC Symbol;Acc:32669]	ENSMMUG00000004538	TRIM71	tripartite motif containing 71 [Source:HGNC Symbol;Acc:HGNC:32669]	Diploid	Diploid
ENSG00000063322	MED29	mediator complex subunit 29 [Source:HGNC Symbol;Acc:23074]	ENSMMUG00000005554	MED29	mediator complex subunit 29 [Source:HGNC Symbol;Acc:HGNC:23074]	Diploid	Diploid
ENSG00000145777	TSLP	thymic stromal lymphopoietin [Source:HGNC Symbol;Acc:30743]	ENSMMUG00000004669	TSLP	thymic stromal lymphopoietin [Source:HGNC Symbol;Acc:HGNC:30743]	Diploid	Diploid
ENSG00000105810	CDK6	cyclin-dependent kinase 6 [Source:HGNC Symbol;Acc:1777]	ENSMMUG00000008698	CDK6	cyclin dependent kinase 6 [Source:HGNC Symbol;Acc:HGNC:1777]	Diploid	Diploid
ENSG00000183813	CCR4	chemokine (C-C motif) receptor 4 [Source:HGNC Symbol;Acc:1605]	ENSMMUG00000022661	CCR4	C-C motif chemokine receptor 4 [Source:HGNC Symbol;Acc:HGNC:1605]	Diploid	Diploid
ENSG00000146039	SLC17A4	solute carrier family 17, member 4 [Source:HGNC Symbol;Acc:10932]	ENSMMUG00000002579	SLC17A4	solute carrier family 17 member 4 [Source:HGNC Symbol;Acc:HGNC:10932]	Diploid	Diploid
ENSG00000089280	FUS	fused in sarcoma [Source:HGNC Symbol;Acc:4010]	ENSMMUG00000019637	FUS	FUS RNA binding protein [Source:HGNC Symbol;Acc:HGNC:4010]	Diploid	Diploid
ENSG00000072518	MARK2	MAP/microtubule affinity-regulating kinase 2 [Source:HGNC Symbol;Acc:3332]	ENSMMUG00000014131	MARK2	microtubule affinity regulating kinase 2 [Source:HGNC Symbol;Acc:HGNC:3332]	Diploid	Diploid
ENSG00000116096	SPR	sepiapterin reductase (7,8-dihydrobiopterin:NADP+ oxidoreductase) [Source:HGNC Symbol;Acc:11257]	ENSMMUG00000009485	SPR	sepiapterin reductase [Source:HGNC Symbol;Acc:HGNC:11257]	Diploid	Diploid
ENSG00000182324	KCNJ14	potassium inwardly-rectifying channel, subfamily J, member 14 [Source:HGNC Symbol;Acc:6260]	ENSMMUG00000001792	KCNJ14	potassium voltage-gated channel subfamily J member 14 [Source:HGNC Symbol;Acc:HGNC:6260]	Diploid	Diploid
ENSG00000105443	CYTH2	cytohesin 2 [Source:HGNC Symbol;Acc:9502]	ENSMMUG00000001793	CYTH2	cytohesin 2 [Source:HGNC Symbol;Acc:HGNC:9502]	Diploid	Diploid
ENSG00000124557	BTN1A1	butyrophilin, subfamily 1, member A1 [Source:HGNC Symbol;Acc:1135]	ENSMMUG00000023008	BTN1A1	butyrophilin subfamily 1 member A1 [Source:HGNC Symbol;Acc:HGNC:1135]	Diploid	Diploid
ENSG00000184281	TSSC4	tumor suppressing subtransferable candidate 4 [Source:HGNC Symbol;Acc:12386]	ENSMMUG00000013772	TSSC4	tumor suppressing subtransferable candidate 4 [Source:HGNC Symbol;Acc:HGNC:12386]	Diploid	Diploid
ENSG00000148400	NOTCH1	notch 1 [Source:HGNC Symbol;Acc:7881]	ENSMMUG00000017022	NOTCH1	notch 1 [Source:HGNC Symbol;Acc:HGNC:7881]	Diploid	Diploid
ENSG00000181433	SAGE1	sarcoma antigen 1 [Source:HGNC Symbol;Acc:30369]	ENSMMUG00000017883			Diploid	Diploid
ENSG00000090889	KIF4A	kinesin family member 4A [Source:HGNC Symbol;Acc:13339]	ENSMMUG00000013940	KIF4A	kinesin family member 4A [Source:HGNC Symbol;Acc:HGNC:13339]	Diploid	Diploid
ENSG00000010610	CD4	CD4 molecule [Source:HGNC Symbol;Acc:1678]	ENSMMUG00000013202	CD4	T-cell surface glycoprotein CD4 precursor [Source:RefSeq peptide;Acc:NP_001036127]	Diploid	Diploid
ENSG00000136859	ANGPTL2	angiopoietin-like 2 [Source:HGNC Symbol;Acc:490]	ENSMMUG00000012161	ANGPTL2	angiopoietin like 2 [Source:HGNC Symbol;Acc:HGNC:490]	Diploid	Diploid
ENSG00000185650	ZFP36L1	ZFP36 ring finger protein-like 1 [Source:HGNC Symbol;Acc:1107]	ENSMMUG00000044603	ZFP36L1	ZFP36 ring finger protein like 1 [Source:HGNC Symbol;Acc:HGNC:1107]	Diploid	Diploid
ENSG00000127837	AAMP	angio-associated, migratory cell protein [Source:HGNC Symbol;Acc:18]	ENSMMUG00000022812	AAMP	angio-associated, migratory cell protein [Source:RefSeq peptide;Acc:NP_001164530]	Diploid	Diploid
ENSG00000034693	PEX3	peroxisomal biogenesis factor 3 [Source:HGNC Symbol;Acc:8858]	ENSMMUG00000005365	PEX3	peroxisomal biogenesis factor 3 [Source:HGNC Symbol;Acc:HGNC:8858]	Diploid	Diploid
ENSG00000205138	SDHAF1	succinate dehydrogenase complex assembly factor 1 [Source:HGNC Symbol;Acc:33867]	ENSMMUG00000048091	SDHAF1	succinate dehydrogenase complex assembly factor 1 [Source:HGNC Symbol;Acc:HGNC:33867]	Diploid	Diploid
ENSG00000135638	EMX1	empty spiracles homeobox 1 [Source:HGNC Symbol;Acc:3340]	ENSMMUG00000012415	EMX2	empty spiracles homeobox 2 [Source:HGNC Symbol;Acc:HGNC:3341]	Diploid	Diploid
ENSG00000066651	TRMT11	tRNA methyltransferase 11 homolog (S. cerevisiae) [Source:HGNC Symbol;Acc:21080]	ENSMMUG00000004293	TRMT11	tRNA methyltransferase 11 homolog [Source:HGNC Symbol;Acc:HGNC:21080]	Diploid	Diploid
ENSG00000145220	LYAR	Ly1 antibody reactive [Source:HGNC Symbol;Acc:26021]	ENSMMUG00000023393	LYAR	Ly1 antibody reactive [Source:HGNC Symbol;Acc:HGNC:26021]	Diploid	Diploid
ENSG00000127774	EMC6	ER membrane protein complex subunit 6 [Source:HGNC Symbol;Acc:28430]	ENSMMUG00000023391	EMC6	ER membrane protein complex subunit 6 [Source:HGNC Symbol;Acc:HGNC:28430]	Diploid	Diploid
ENSG00000105447	GRWD1	glutamate-rich WD repeat containing 1 [Source:HGNC Symbol;Acc:21270]	ENSMMUG00000001791	GRWD1	glutamate rich WD repeat containing 1 [Source:HGNC Symbol;Acc:HGNC:21270]	Diploid	Diploid
ENSG00000112559	MDFI	MyoD family inhibitor [Source:HGNC Symbol;Acc:6967]	ENSMMUG00000009449	MDFI	MyoD family inhibitor [Source:HGNC Symbol;Acc:HGNC:6967]	Diploid	Diploid
ENSG00000213977	TAX1BP3	Tax1 (human T-cell leukemia virus type I) binding protein 3 [Source:HGNC Symbol;Acc:30684]	ENSMMUG00000023390	TAX1BP3	Tax1 binding protein 3 [Source:HGNC Symbol;Acc:HGNC:30684]	Diploid	Diploid
ENSG00000196711	FAM150A	family with sequence similarity 150, member A [Source:HGNC Symbol;Acc:33775]	ENSMMUG00000042459	ALKAL1	ALK and LTK ligand 1 [Source:HGNC Symbol;Acc:HGNC:33775]	Diploid	Diploid
ENSG00000175877	WBSCR28	Williams-Beuren syndrome chromosome region 28 [Source:HGNC Symbol;Acc:23018]	ENSMMUG00000003440	TMEM270	transmembrane protein 270 [Source:HGNC Symbol;Acc:HGNC:23018]	Diploid	Diploid
ENSG00000046653	GPM6B	glycoprotein M6B [Source:HGNC Symbol;Acc:4461]	ENSMMUG00000019415	GPM6B	glycoprotein M6B [Source:HGNC Symbol;Acc:HGNC:4461]	Diploid	Diploid
ENSG00000115993	TRAK2	trafficking protein, kinesin binding 2 [Source:HGNC Symbol;Acc:13206]	ENSMMUG00000041448	TRAK2	trafficking kinesin protein 2 [Source:HGNC Symbol;Acc:HGNC:13206]	Diploid	Diploid
ENSG00000076641	PAG1	phosphoprotein associated with glycosphingolipid microdomains 1 [Source:HGNC Symbol;Acc:30043]	ENSMMUG00000023342	PAG1	phosphoprotein membrane anchor with glycosphingolipid microdomains 1 [Source:HGNC Symbol;Acc:HGNC:30043]	Diploid	Diploid
ENSG00000186642	PDE2A	phosphodiesterase 2A, cGMP-stimulated [Source:HGNC Symbol;Acc:8777]	ENSMMUG00000015051	PDE2A	cGMP-dependent 3',5'-cyclic phosphodiesterase [Source:RefSeq peptide;Acc:NP_001124298]	Diploid	Diploid
ENSG00000120509	PDZD11	PDZ domain containing 11 [Source:HGNC Symbol;Acc:28034]	ENSMMUG00000041370	PDZD11	PDZ domain containing 11 [Source:HGNC Symbol;Acc:HGNC:28034]	Diploid	Diploid
ENSG00000175213	ZNF408	zinc finger protein 408 [Source:HGNC Symbol;Acc:20041]	ENSMMUG00000019673	ZNF408	zinc finger protein 408 [Source:HGNC Symbol;Acc:HGNC:20041]	Diploid	Diploid
ENSG00000102401	ARMCX3	armadillo repeat containing, X-linked 3 [Source:HGNC Symbol;Acc:24065]	ENSMMUG00000015655	ARMCX3	armadillo repeat containing, X-linked 3 [Source:HGNC Symbol;Acc:HGNC:24065]	Diploid	Diploid
ENSG00000171346	KRT15	keratin 15 [Source:HGNC Symbol;Acc:6421]	ENSMMUG00000018647	KRT15	keratin 15 [Source:HGNC Symbol;Acc:HGNC:6421]	Diploid	Diploid
ENSG00000168032	ENTPD3	ectonucleoside triphosphate diphosphohydrolase 3 [Source:HGNC Symbol;Acc:3365]	ENSMMUG00000013330	ENTPD3	ectonucleoside triphosphate diphosphohydrolase 3 [Source:HGNC Symbol;Acc:HGNC:3365]	Diploid	Diploid
ENSG00000172465	TCEAL1	transcription elongation factor A (SII)-like 1 [Source:HGNC Symbol;Acc:11616]	ENSMMUG00000003500	TCEAL1	transcription elongation factor A like 1 [Source:HGNC Symbol;Acc:HGNC:11616]	Diploid	Diploid
ENSG00000121351	IAPP	islet amyloid polypeptide [Source:HGNC Symbol;Acc:5329]	ENSMMUG00000032087	IAPP	islet amyloid polypeptide [Source:HGNC Symbol;Acc:HGNC:5329]	Diploid	Diploid
ENSG00000101463	SYNDIG1	synapse differentiation inducing 1 [Source:HGNC Symbol;Acc:15885]	ENSMMUG00000015852	SYNDIG1	synapse differentiation inducing 1 [Source:HGNC Symbol;Acc:HGNC:15885]	Diploid	Diploid
ENSG00000103995	CEP152	centrosomal protein 152kDa [Source:HGNC Symbol;Acc:29298]	ENSMMUG00000009829	CEP152	centrosomal protein 152 [Source:HGNC Symbol;Acc:HGNC:29298]	Diploid	Diploid
ENSG00000084453	SLCO1A2	solute carrier organic anion transporter family, member 1A2 [Source:HGNC Symbol;Acc:10956]	ENSMMUG00000008584	SLCO1A2	solute carrier organic anion transporter family member 1A2 [Source:HGNC Symbol;Acc:HGNC:10956]	Diploid	Diploid
ENSG00000198168	SVIP	small VCP/p97-interacting protein [Source:HGNC Symbol;Acc:25238]	ENSMMUG00000020820	SVIP	small VCP interacting protein [Source:HGNC Symbol;Acc:HGNC:25238]	Diploid	Diploid
ENSG00000110218	PANX1	pannexin 1 [Source:HGNC Symbol;Acc:8599]	ENSMMUG00000004503	PANX1	pannexin 1 [Source:HGNC Symbol;Acc:HGNC:8599]	Diploid	Diploid
ENSG00000102984	ZNF821	zinc finger protein 821 [Source:HGNC Symbol;Acc:28043]	ENSMMUG00000016716	ZNF821	zinc finger protein 821 [Source:HGNC Symbol;Acc:HGNC:28043]	Diploid	Diploid
ENSG00000105143	SLC1A6	solute carrier family 1 (high affinity aspartate/glutamate transporter), member 6 [Source:HGNC Symbol;Acc:10944]	ENSMMUG00000001735	SLC1A6	solute carrier family 1 member 6 [Source:HGNC Symbol;Acc:HGNC:10944]	Diploid	Diploid
ENSG00000166446	CDYL2	chromodomain protein, Y-like 2 [Source:HGNC Symbol;Acc:23030]	ENSMMUG00000011847	CDYL2	chromodomain Y like 2 [Source:HGNC Symbol;Acc:HGNC:23030]	Diploid	Diploid
ENSG00000165066	NKX6-3	NK6 homeobox 3 [Source:HGNC Symbol;Acc:26328]	ENSMMUG00000020182			Diploid	Diploid
ENSG00000136059	VILL	villin-like [Source:HGNC Symbol;Acc:30906]	ENSMMUG00000000984	VILL	villin like [Source:HGNC Symbol;Acc:HGNC:30906]	Diploid	Diploid
ENSG00000204548	DEFB121	defensin, beta 121 [Source:HGNC Symbol;Acc:18101]	ENSMMUG00000017530	DEFB121	defensin beta 121 [Source:HGNC Symbol;Acc:HGNC:18101]	Diploid	Diploid
ENSG00000137203	TFAP2A	transcription factor AP-2 alpha (activating enhancer binding protein 2 alpha) [Source:HGNC Symbol;Acc:11742]	ENSMMUG00000006186	TFAP2A	transcription factor AP-2 alpha [Source:HGNC Symbol;Acc:HGNC:11742]	Diploid	Diploid
ENSG00000157191	NECAP2	NECAP endocytosis associated 2 [Source:HGNC Symbol;Acc:25528]	ENSMMUG00000019940	NECAP2	adaptin ear-binding coat-associated protein 2 [Source:RefSeq peptide;Acc:NP_001245101]	Diploid	Diploid
ENSG00000136237	RAPGEF5	Rap guanine nucleotide exchange factor (GEF) 5 [Source:HGNC Symbol;Acc:16862]	ENSMMUG00000002987	RAPGEF5	rap guanine nucleotide exchange factor 5 [Source:RefSeq peptide;Acc:NP_001181087]	Diploid	Diploid
ENSG00000077984	CST7	cystatin F (leukocystatin) [Source:HGNC Symbol;Acc:2479]	ENSMMUG00000005757	CST7	cystatin F [Source:HGNC Symbol;Acc:HGNC:2479]	Diploid	Diploid
ENSG00000175467	SART1	squamous cell carcinoma antigen recognized by T cells [Source:HGNC Symbol;Acc:10538]	ENSMMUG00000008065	SART1	SART1, U4/U6.U5 tri-snRNP-associated protein 1 [Source:HGNC Symbol;Acc:HGNC:10538]	Diploid	Diploid
ENSG00000180998	GPR137C	G protein-coupled receptor 137C [Source:HGNC Symbol;Acc:25445]	ENSMMUG00000006998	GPR137C	G protein-coupled receptor 137C [Source:HGNC Symbol;Acc:HGNC:25445]	Diploid	Diploid
ENSG00000172159	FRMD3	FERM domain containing 3 [Source:HGNC Symbol;Acc:24125]	ENSMMUG00000017180	FRMD3	FERM domain containing 3 [Source:HGNC Symbol;Acc:HGNC:24125]	Diploid	Diploid
ENSG00000182459	TEX19	testis expressed 19 [Source:HGNC Symbol;Acc:33802]	ENSMMUG00000044068	TEX19	testis expressed 19 [Source:HGNC Symbol;Acc:HGNC:33802]	Diploid	Diploid
ENSG00000205413	SAMD9	sterile alpha motif domain containing 9 [Source:HGNC Symbol;Acc:1348]	ENSMMUG00000000170	SAMD9	sterile alpha motif domain containing 9 [Source:HGNC Symbol;Acc:HGNC:1348]	Diploid	Diploid
ENSG00000143867	OSR1	odd-skipped related transciption factor 1 [Source:HGNC Symbol;Acc:8111]	ENSMMUG00000037622	OSR1	odd-skipped related transciption factor 1 [Source:HGNC Symbol;Acc:HGNC:8111]	Diploid	Diploid
ENSG00000169258	GPRIN1	G protein regulated inducer of neurite outgrowth 1 [Source:HGNC Symbol;Acc:24835]	ENSMMUG00000013284	GPRIN1	G protein regulated inducer of neurite outgrowth 1 [Source:HGNC Symbol;Acc:HGNC:24835]	Diploid	Diploid
ENSG00000181408	UTS2R	urotensin 2 receptor [Source:HGNC Symbol;Acc:4468]	ENSMMUG00000001119	UTS2R	urotensin 2 receptor [Source:HGNC Symbol;Acc:HGNC:4468]	Diploid	Diploid
ENSG00000180210	F2	coagulation factor II (thrombin) [Source:HGNC Symbol;Acc:3535]	ENSMMUG00000019674	F2	coagulation factor II, thrombin [Source:HGNC Symbol;Acc:HGNC:3535]	Diploid	Diploid
ENSG00000157514	TSC22D3	TSC22 domain family, member 3 [Source:HGNC Symbol;Acc:3051]	ENSMMUG00000008207	TSC22D3	TSC22 domain family member 3 [Source:HGNC Symbol;Acc:HGNC:3051]	Diploid	Diploid
ENSG00000154262	ABCA6	ATP-binding cassette, sub-family A (ABC1), member 6 [Source:HGNC Symbol;Acc:36]	ENSMMUG00000018592	ABCA6	ATP binding cassette subfamily A member 6 [Source:HGNC Symbol;Acc:HGNC:36]	Diploid	Diploid
ENSG00000144792	ZNF660	zinc finger protein 660 [Source:HGNC Symbol;Acc:26720]	ENSMMUG00000031704	ZNF660	zinc finger protein 660 [Source:HGNC Symbol;Acc:HGNC:26720]	Diploid	Diploid
ENSG00000128016	ZFP36	ZFP36 ring finger protein [Source:HGNC Symbol;Acc:12862]	ENSMMUG00000038702	ZFP36	ZFP36 ring finger protein [Source:HGNC Symbol;Acc:HGNC:12862]	Diploid	Diploid
ENSG00000186448	ZNF197	zinc finger protein 197 [Source:HGNC Symbol;Acc:12988]	ENSMMUG00000017585	ZNF197	zinc finger protein 197 [Source:HGNC Symbol;Acc:HGNC:12988]	Diploid	Diploid
ENSG00000104808	DHDH	dihydrodiol dehydrogenase (dimeric) [Source:HGNC Symbol;Acc:17887]	ENSMMUG00000003905	DHDH	dihydrodiol dehydrogenase [Source:HGNC Symbol;Acc:HGNC:17887]	Diploid	Diploid
ENSG00000069018	TRPC7	transient receptor potential cation channel, subfamily C, member 7 [Source:HGNC Symbol;Acc:20754]	ENSMMUG00000000342	TRPC7	transient receptor potential cation channel subfamily C member 7 [Source:HGNC Symbol;Acc:HGNC:20754]	Diploid	Diploid
ENSG00000174145	KIAA1239	KIAA1239 [Source:HGNC Symbol;Acc:29229]	ENSMMUG00000003676	NWD2	NACHT and WD repeat domain containing 2 [Source:HGNC Symbol;Acc:HGNC:29229]	Diploid	Diploid
ENSG00000126545	CSN1S1	casein alpha s1 [Source:HGNC Symbol;Acc:2445]	ENSMMUG00000047324	CSN1S1	casein alpha s1 [Source:HGNC Symbol;Acc:HGNC:2445]	Diploid	Diploid
ENSG00000183560	FOLR4	folate receptor 4, delta (putative) [Source:HGNC Symbol;Acc:32565]	ENSMMUG00000040247	IZUMO1R	probable folate receptor delta precursor [Source:RefSeq peptide;Acc:NP_001180734]	Diploid	Diploid
ENSG00000123562	MORF4L2	mortality factor 4 like 2 [Source:HGNC Symbol;Acc:16849]	ENSMMUG00000006111	MORF4L2	mortality factor 4 like 2 [Source:HGNC Symbol;Acc:HGNC:16849]	Diploid	Diploid
ENSG00000033170	FUT8	fucosyltransferase 8 (alpha (1,6) fucosyltransferase) [Source:HGNC Symbol;Acc:4019]	ENSMMUG00000013848	FUT8	fucosyltransferase 8 [Source:HGNC Symbol;Acc:HGNC:4019]	Diploid	Diploid
ENSG00000168077	SCARA3	scavenger receptor class A, member 3 [Source:HGNC Symbol;Acc:19000]	ENSMMUG00000021517	SCARA3	scavenger receptor class A member 3 [Source:HGNC Symbol;Acc:HGNC:19000]	Diploid	Diploid
ENSG00000185088	RPS27L	ribosomal protein S27-like [Source:HGNC Symbol;Acc:18476]	ENSMMUG00000016350	RPS27L	ribosomal protein S27 like [Source:HGNC Symbol;Acc:HGNC:18476]	Diploid	Diploid
ENSG00000239382	ALKBH6	alkB, alkylation repair homolog 6 (E. coli) [Source:HGNC Symbol;Acc:28243]	ENSMMUG00000019700	ALKBH6	alkB homolog 6 [Source:HGNC Symbol;Acc:HGNC:28243]	Diploid	Diploid
ENSG00000120907	ADRA1A	adrenoceptor alpha 1A [Source:HGNC Symbol;Acc:277]	ENSMMUG00000023112	ADRA1A	Macaca mulatta adrenoceptor alpha 1A (ADRA1A), mRNA. [Source:RefSeq mRNA;Acc:NM_001114733]	Diploid	Diploid
ENSG00000123901	GPR83	G protein-coupled receptor 83 [Source:HGNC Symbol;Acc:4523]	ENSMMUG00000004111	GPR83	G protein-coupled receptor 83 [Source:HGNC Symbol;Acc:HGNC:4523]	Diploid	Diploid
ENSG00000154274	C4orf19	chromosome 4 open reading frame 19 [Source:HGNC Symbol;Acc:25618]	ENSMMUG00000009691	C4orf19	chromosome 4 open reading frame 19 [Source:HGNC Symbol;Acc:HGNC:25618]	Diploid	Diploid
ENSG00000115310	RTN4	reticulon 4 [Source:HGNC Symbol;Acc:14085]	ENSMMUG00000021299	RTN4	reticulon 4 [Source:HGNC Symbol;Acc:HGNC:14085]	Diploid	Diploid
ENSG00000181826	RELL1	RELT-like 1 [Source:HGNC Symbol;Acc:27379]	ENSMMUG00000017630	RELL1	RELT like 1 [Source:HGNC Symbol;Acc:HGNC:27379]	Diploid	Diploid
ENSG00000102053	ZC3H12B	zinc finger CCCH-type containing 12B [Source:HGNC Symbol;Acc:17407]	ENSMMUG00000012261	ZC3H12B	zinc finger CCCH-type containing 12B [Source:HGNC Symbol;Acc:HGNC:17407]	Diploid	Diploid
ENSG00000153310	FAM49B	family with sequence similarity 49, member B [Source:HGNC Symbol;Acc:25216]	ENSMMUG00000015348	FAM49B	uncharacterized protein LOC695449 [Source:RefSeq peptide;Acc:NP_001248623]	Diploid	Diploid
ENSG00000166068	SPRED1	sprouty-related, EVH1 domain containing 1 [Source:HGNC Symbol;Acc:20249]	ENSMMUG00000010704	SPRED1	sprouty related EVH1 domain containing 1 [Source:HGNC Symbol;Acc:HGNC:20249]	Diploid	Diploid
ENSG00000145721	LIX1	Lix1 homolog (chicken) [Source:HGNC Symbol;Acc:18581]	ENSMMUG00000019953	LIX1	limb and CNS expressed 1 [Source:HGNC Symbol;Acc:HGNC:18581]	Diploid	Diploid
ENSG00000181915	ADO	2-aminoethanethiol (cysteamine) dioxygenase [Source:HGNC Symbol;Acc:23506]	ENSMMUG00000030528	ADO	2-aminoethanethiol dioxygenase [Source:HGNC Symbol;Acc:HGNC:23506]	Diploid	Diploid
ENSG00000204308	RNF5	ring finger protein 5, E3 ubiquitin protein ligase [Source:HGNC Symbol;Acc:10068]	ENSMMUG00000018438	RNF5	ring finger protein 5 [Source:HGNC Symbol;Acc:HGNC:10068]	Diploid	Diploid
ENSG00000112561	TFEB	transcription factor EB [Source:HGNC Symbol;Acc:11753]	ENSMMUG00000004690	TFEB	transcription factor EB [Source:RefSeq peptide;Acc:NP_001253249]	Diploid	Diploid
ENSG00000118971	CCND2	cyclin D2 [Source:HGNC Symbol;Acc:1583]	ENSMMUG00000008546	CCND2	cyclin D2 [Source:HGNC Symbol;Acc:HGNC:1583]	Diploid	Diploid
ENSG00000172818	OVOL1	ovo-like zinc finger 1 [Source:HGNC Symbol;Acc:8525]	ENSMMUG00000012585	OVOL1	ovo like transcriptional repressor 1 [Source:HGNC Symbol;Acc:HGNC:8525]	Diploid	Diploid
ENSG00000143882	ATP6V1C2	ATPase, H+ transporting, lysosomal 42kDa, V1 subunit C2 [Source:HGNC Symbol;Acc:18264]	ENSMMUG00000010320	ATP6V1C2	ATPase H+ transporting V1 subunit C2 [Source:HGNC Symbol;Acc:HGNC:18264]	Diploid	Diploid
ENSG00000156858	PRR14	proline rich 14 [Source:HGNC Symbol;Acc:28458]	ENSMMUG00000013296	PRR14	proline rich 14 [Source:HGNC Symbol;Acc:HGNC:28458]	Diploid	Diploid
ENSG00000154146	NRGN	neurogranin (protein kinase C substrate, RC3) [Source:HGNC Symbol;Acc:8000]	ENSMMUG00000008481	NRGN	neurogranin [Source:HGNC Symbol;Acc:HGNC:8000]	Diploid	Diploid
ENSG00000164929	BAALC	brain and acute leukemia, cytoplasmic [Source:HGNC Symbol;Acc:14333]	ENSMMUG00000019398	BAALC	brain and acute leukemia, cytoplasmic [Source:HGNC Symbol;Acc:HGNC:14333]	Diploid	Diploid
ENSG00000164930	FZD6	frizzled family receptor 6 [Source:HGNC Symbol;Acc:4044]	ENSMMUG00000019399	FZD6	frizzled class receptor 6 [Source:HGNC Symbol;Acc:HGNC:4044]	Diploid	Diploid
ENSG00000196678	ERI2	ERI1 exoribonuclease family member 2 [Source:HGNC Symbol;Acc:30541]	ENSMMUG00000016746	ERI2	ERI1 exoribonuclease family member 2 [Source:HGNC Symbol;Acc:HGNC:30541]	Diploid	Diploid
ENSG00000077274	CAPN6	calpain 6 [Source:HGNC Symbol;Acc:1483]	ENSMMUG00000015308	CAPN6	calpain 6 [Source:HGNC Symbol;Acc:HGNC:1483]	Diploid	Diploid
ENSG00000175084	DES	desmin [Source:HGNC Symbol;Acc:2770]	ENSMMUG00000017933	DES	desmin [Source:HGNC Symbol;Acc:HGNC:2770]	Diploid	Diploid
ENSG00000065268	WDR18	WD repeat domain 18 [Source:HGNC Symbol;Acc:17956]	ENSMMUG00000002638	WDR18	WD repeat domain 18 [Source:HGNC Symbol;Acc:HGNC:17956]	Diploid	Diploid
ENSG00000101670	LIPG	lipase, endothelial [Source:HGNC Symbol;Acc:6623]	ENSMMUG00000019054	LIPG	lipase G, endothelial type [Source:HGNC Symbol;Acc:HGNC:6623]	Diploid	Diploid
ENSG00000213928	IRF9	interferon regulatory factor 9 [Source:HGNC Symbol;Acc:6131]	ENSMMUG00000040817	IRF9	interferon regulatory factor 9 [Source:HGNC Symbol;Acc:HGNC:6131]	Diploid	Diploid
ENSG00000183644	C11orf88	chromosome 11 open reading frame 88 [Source:HGNC Symbol;Acc:25061]	ENSMMUG00000021439	C11orf88	chromosome 11 open reading frame 88 [Source:HGNC Symbol;Acc:HGNC:25061]	Diploid	Diploid
ENSG00000188778	ADRB3	adrenoceptor beta 3 [Source:HGNC Symbol;Acc:288]	ENSMMUG00000005876	ADRB3	adrenoceptor beta 3 [Source:HGNC Symbol;Acc:HGNC:288]	Diploid	Diploid
ENSG00000095739	BAMBI	BMP and activin membrane-bound inhibitor [Source:HGNC Symbol;Acc:30251]	ENSMMUG00000000567	BAMBI	BMP and activin membrane bound inhibitor [Source:HGNC Symbol;Acc:HGNC:30251]	Diploid	Diploid
ENSG00000149564	ESAM	endothelial cell adhesion molecule [Source:HGNC Symbol;Acc:17474]	ENSMMUG00000008486	ESAM	endothelial cell adhesion molecule [Source:HGNC Symbol;Acc:HGNC:17474]	Diploid	Diploid
ENSG00000123144	C19orf43	chromosome 19 open reading frame 43 [Source:HGNC Symbol;Acc:28424]	ENSMMUG00000006274	TRIR	telomerase RNA component interacting RNase [Source:HGNC Symbol;Acc:HGNC:28424]	Diploid	Diploid
ENSG00000112246	SIM1	single-minded family bHLH transcription factor 1 [Source:HGNC Symbol;Acc:10882]	ENSMMUG00000022285	SIM1	single-minded family bHLH transcription factor 1 [Source:HGNC Symbol;Acc:HGNC:10882]	Diploid	Diploid
ENSG00000129562	DAD1	defender against cell death 1 [Source:HGNC Symbol;Acc:2664]	ENSMMUG00000000830	DAD1	defender against cell death 1 [Source:HGNC Symbol;Acc:HGNC:2664]	Diploid	Diploid
ENSG00000100823	APEX1	APEX nuclease (multifunctional DNA repair enzyme) 1 [Source:HGNC Symbol;Acc:587]	ENSMMUG00000048039	APEX1	apurinic/apyrimidinic endodeoxyribonuclease 1 [Source:HGNC Symbol;Acc:HGNC:587]	Diploid	Diploid
ENSG00000156049	GNA14	guanine nucleotide binding protein (G protein), alpha 14 [Source:HGNC Symbol;Acc:4382]	ENSMMUG00000019761	GNA14	G protein subunit alpha 14 [Source:HGNC Symbol;Acc:HGNC:4382]	Diploid	Diploid
ENSG00000100439	ABHD4	abhydrolase domain containing 4 [Source:HGNC Symbol;Acc:20154]	ENSMMUG00000009441	ABHD4	abhydrolase domain-containing protein 4 [Source:RefSeq peptide;Acc:NP_001247685]	Diploid	Diploid
ENSG00000123444	KBTBD4	kelch repeat and BTB (POZ) domain containing 4 [Source:HGNC Symbol;Acc:23761]	ENSMMUG00000004289	KBTBD4	kelch repeat and BTB domain containing 4 [Source:HGNC Symbol;Acc:HGNC:23761]	Diploid	Diploid
ENSG00000100056	DGCR14	DiGeorge syndrome critical region gene 14 [Source:HGNC Symbol;Acc:16817]	ENSMMUG00000017384	ESS2	ess-2 splicing factor homolog [Source:HGNC Symbol;Acc:HGNC:16817]	Diploid	Diploid
ENSG00000029993	HMGB3	high mobility group box 3 [Source:HGNC Symbol;Acc:5004]	ENSMMUG00000004633			Diploid	Diploid
ENSG00000100911	PSME2	proteasome (prosome, macropain) activator subunit 2 (PA28 beta) [Source:HGNC Symbol;Acc:9569]	ENSMMUG00000012473	PSME2	proteasome activator subunit 2 [Source:HGNC Symbol;Acc:HGNC:9569]	Diploid	Diploid
ENSG00000001497	LAS1L	LAS1-like (S. cerevisiae) [Source:HGNC Symbol;Acc:25726]	ENSMMUG00000003922	LAS1L	LAS1 like, ribosome biogenesis factor [Source:HGNC Symbol;Acc:HGNC:25726]	Diploid	Diploid
ENSG00000170967	DDI1	DNA-damage inducible 1 homolog 1 (S. cerevisiae) [Source:HGNC Symbol;Acc:18961]	ENSMMUG00000042509	DDI1	DNA damage inducible 1 homolog 1 [Source:HGNC Symbol;Acc:HGNC:18961]	Diploid	Diploid
ENSG00000170962	PDGFD	platelet derived growth factor D [Source:HGNC Symbol;Acc:30620]	ENSMMUG00000005353	PDGFD	platelet derived growth factor D [Source:HGNC Symbol;Acc:HGNC:30620]	Diploid	Diploid
ENSG00000173826	KCNH6	potassium voltage-gated channel, subfamily H (eag-related), member 6 [Source:HGNC Symbol;Acc:18862]	ENSMMUG00000005183	KCNH6	potassium voltage-gated channel subfamily H member 6 [Source:HGNC Symbol;Acc:HGNC:18862]	Diploid	Diploid
ENSG00000135919	SERPINE2	serpin peptidase inhibitor, clade E (nexin, plasminogen activator inhibitor type 1), member 2 [Source:HGNC Symbol;Acc:8951]	ENSMMUG00000006161	SERPINE2	serpin family E member 2 [Source:HGNC Symbol;Acc:HGNC:8951]	Diploid	Diploid
ENSG00000173482	PTPRM	protein tyrosine phosphatase, receptor type, M [Source:HGNC Symbol;Acc:9675]	ENSMMUG00000000768	PTPRM	protein tyrosine phosphatase, receptor type M [Source:HGNC Symbol;Acc:HGNC:9675]	Diploid	Diploid
ENSG00000206203	TSSK2	testis-specific serine kinase 2 [Source:HGNC Symbol;Acc:11401]	ENSMMUG00000017385	TSSK2	testis specific serine kinase 2 [Source:HGNC Symbol;Acc:HGNC:11401]	Diploid	Diploid
ENSG00000198356	ASNA1	arsA arsenite transporter, ATP-binding, homolog 1 (bacterial) [Source:HGNC Symbol;Acc:752]	ENSMMUG00000006275	ASNA1	arsA arsenite transporter, ATP-binding, homolog 1 (bacterial) [Source:HGNC Symbol;Acc:HGNC:752]	Diploid	Diploid
ENSG00000165669	FAM204A	family with sequence similarity 204, member A [Source:HGNC Symbol;Acc:25794]	ENSMMUG00000012741	C10orf84	family with sequence similarity 204 member A [Source:HGNC Symbol;Acc:HGNC:25794]	Diploid	Diploid
ENSG00000184571	PIWIL3	piwi-like RNA-mediated gene silencing 3 [Source:HGNC Symbol;Acc:18443]	ENSMMUG00000020325	PIWIL3	piwi like RNA-mediated gene silencing 3 [Source:HGNC Symbol;Acc:HGNC:18443]	Diploid	Diploid
ENSG00000155265	GOLGA7B	golgin A7 family, member B [Source:HGNC Symbol;Acc:31668]	ENSMMUG00000044165	GOLGA7B	golgin A7 family member B [Source:HGNC Symbol;Acc:HGNC:31668]	Diploid	Diploid
ENSG00000115593	SMYD1	SET and MYND domain containing 1 [Source:HGNC Symbol;Acc:20986]	ENSMMUG00000008055	SMYD1	SET and MYND domain containing 1 [Source:HGNC Symbol;Acc:HGNC:20986]	Diploid	Diploid
ENSG00000122952	ZWINT	ZW10 interacting kinetochore protein [Source:HGNC Symbol;Acc:13195]	ENSMMUG00000022376	ZWINT	ZW10 interacting kinetochore protein [Source:HGNC Symbol;Acc:HGNC:13195]	Diploid	Diploid
ENSG00000139194	RBP5	retinol binding protein 5, cellular [Source:HGNC Symbol;Acc:15847]	ENSMMUG00000008898	RBP5	retinol binding protein 5 [Source:HGNC Symbol;Acc:HGNC:15847]	Diploid	Diploid
ENSG00000160703	NLRX1	NLR family member X1 [Source:HGNC Symbol;Acc:29890]	ENSMMUG00000012189	NLRX1	NLR family member X1 [Source:HGNC Symbol;Acc:HGNC:29890]	Diploid	Diploid
ENSG00000113448	PDE4D	phosphodiesterase 4D, cAMP-specific [Source:HGNC Symbol;Acc:8783]	ENSMMUG00000012132	PDE4D	phosphodiesterase 4D [Source:HGNC Symbol;Acc:HGNC:8783]	Diploid	Diploid
ENSG00000104164	BLOC1S6	biogenesis of lysosomal organelles complex-1, subunit 6, pallidin [Source:HGNC Symbol;Acc:8549]	ENSMMUG00000004449	BLOC1S6	biogenesis of lysosomal organelles complex 1 subunit 6 [Source:HGNC Symbol;Acc:HGNC:8549]	Diploid	Diploid
ENSG00000187664	HAPLN4	hyaluronan and proteoglycan link protein 4 [Source:HGNC Symbol;Acc:31357]	ENSMMUG00000008578	HAPLN4	hyaluronan and proteoglycan link protein 4 [Source:HGNC Symbol;Acc:HGNC:31357]	Diploid	Diploid
ENSG00000105141	CASP14	caspase 14, apoptosis-related cysteine peptidase [Source:HGNC Symbol;Acc:1502]	ENSMMUG00000018392	CASP14	caspase 14 [Source:HGNC Symbol;Acc:HGNC:1502]	Diploid	Diploid
ENSG00000213996	TM6SF2	transmembrane 6 superfamily member 2 [Source:HGNC Symbol;Acc:11861]	ENSMMUG00000008576	TM6SF2	transmembrane 6 superfamily member 2 [Source:HGNC Symbol;Acc:HGNC:11861]	Diploid	Diploid
ENSG00000167535	CACNB3	calcium channel, voltage-dependent, beta 3 subunit [Source:HGNC Symbol;Acc:1403]	ENSMMUG00000008430	CACNB3	calcium voltage-gated channel auxiliary subunit beta 3 [Source:HGNC Symbol;Acc:HGNC:1403]	Diploid	Diploid
ENSG00000128849	CGNL1	cingulin-like 1 [Source:HGNC Symbol;Acc:25931]	ENSMMUG00000005179	CGNL1	cingulin like 1 [Source:HGNC Symbol;Acc:HGNC:25931]	Diploid	Diploid
ENSG00000204305	AGER	advanced glycosylation end product-specific receptor [Source:HGNC Symbol;Acc:320]	ENSMMUG00000018442	AGER	advanced glycosylation end product-specific receptor precursor [Source:RefSeq peptide;Acc:NP_001192046]	Diploid	Diploid
	ENSMMUG00000048622	TTC34	tetratricopeptide repeat domain 34 [Source:HGNC Symbol;Acc:HGNC:34297]	Diploid	Diploid
ENSG00000213619	NDUFS3	NADH dehydrogenase (ubiquinone) Fe-S protein 3, 30kDa (NADH-coenzyme Q reductase) [Source:HGNC Symbol;Acc:7710]	ENSMMUG00000045281	NDUFS3	NADH:ubiquinone oxidoreductase core subunit S3 [Source:HGNC Symbol;Acc:HGNC:7710]	Diploid	Diploid
ENSG00000180535	BHLHA15	basic helix-loop-helix family, member a15 [Source:HGNC Symbol;Acc:22265]	ENSMMUG00000041958	BHLHA15	basic helix-loop-helix family member a15 [Source:HGNC Symbol;Acc:HGNC:22265]	Diploid	Diploid
ENSG00000095539	SEMA4G	sema domain, immunoglobulin domain (Ig), transmembrane domain (TM) and short cytoplasmic domain, (semaphorin) 4G [Source:HGNC Symbol;Acc:10735]	ENSMMUG00000010680	SEMA4G	semaphorin 4G [Source:HGNC Symbol;Acc:HGNC:10735]	Diploid	Diploid
ENSG00000182378	PLCXD1	phosphatidylinositol-specific phospholipase C, X domain containing 1 [Source:HGNC Symbol;Acc:23148]	ENSMMUG00000047259	PLCXD1	phosphatidylinositol specific phospholipase C X domain containing 1 [Source:HGNC Symbol;Acc:HGNC:23148]	Diploid	Diploid
ENSG00000144152	FBLN7	fibulin 7 [Source:HGNC Symbol;Acc:26740]	ENSMMUG00000002234	FBLN7	fibulin 7 [Source:HGNC Symbol;Acc:HGNC:26740]	Diploid	Diploid
ENSG00000102897	LYRM1	LYR motif containing 1 [Source:HGNC Symbol;Acc:25074]	ENSMMUG00000016752	LYRM1	LYR motif containing 1 [Source:HGNC Symbol;Acc:HGNC:25074]	Diploid	Diploid
ENSG00000150048	CLEC1A	C-type lectin domain family 1, member A [Source:HGNC Symbol;Acc:24355]	ENSMMUG00000005832	CLEC1A	C-type lectin domain family 1 member A [Source:HGNC Symbol;Acc:HGNC:24355]	Diploid	Diploid
ENSG00000080561	MID2	midline 2 [Source:HGNC Symbol;Acc:7096]	ENSMMUG00000005632	MID2	midline 2 [Source:HGNC Symbol;Acc:HGNC:7096]	Diploid	Diploid
ENSG00000101977	MCF2	MCF.2 cell line derived transforming sequence [Source:HGNC Symbol;Acc:6940]	ENSMMUG00000020066	MCF2	MCF.2 cell line derived transforming sequence [Source:HGNC Symbol;Acc:HGNC:6940]	Diploid	Diploid
ENSG00000169891	REPS2	RALBP1 associated Eps domain containing 2 [Source:HGNC Symbol;Acc:9963]	ENSMMUG00000010598	REPS2	RALBP1 associated Eps domain containing 2 [Source:HGNC Symbol;Acc:HGNC:9963]	Diploid	Diploid
ENSG00000198689	SLC9A6	solute carrier family 9, subfamily A (NHE6, cation proton antiporter 6), member 6 [Source:HGNC Symbol;Acc:11079]	ENSMMUG00000011271	SLC9A6	solute carrier family 9 member A6 [Source:HGNC Symbol;Acc:HGNC:11079]	Diploid	Diploid
ENSG00000072849	DERL2	derlin 2 [Source:HGNC Symbol;Acc:17943]	ENSMMUG00000006599	DERL2	derlin 2 [Source:HGNC Symbol;Acc:HGNC:17943]	Diploid	Diploid
ENSG00000175324	LSM1	LSM1 homolog, U6 small nuclear RNA associated (S. cerevisiae) [Source:HGNC Symbol;Acc:20472]	ENSMMUG00000013774			Diploid	Diploid
ENSG00000105137	SYDE1	synapse defective 1, Rho GTPase, homolog 1 (C. elegans) [Source:HGNC Symbol;Acc:25824]	ENSMMUG00000007726	SYDE1	synapse defective Rho GTPase homolog 1 [Source:HGNC Symbol;Acc:HGNC:25824]	Diploid	Diploid
ENSG00000167468	GPX4	glutathione peroxidase 4 [Source:HGNC Symbol;Acc:4556]	ENSMMUG00000028946	GPX4	glutathione peroxidase 4 precursor [Source:RefSeq peptide;Acc:NP_001112361]	Diploid	Diploid
ENSG00000137496	IL18BP	interleukin 18 binding protein [Source:HGNC Symbol;Acc:5987]	ENSMMUG00000007340	IL18BP	interleukin 18 binding protein [Source:HGNC Symbol;Acc:HGNC:5987]	Diploid	Diploid
ENSG00000110536	PTPMT1	protein tyrosine phosphatase, mitochondrial 1 [Source:HGNC Symbol;Acc:26965]	ENSMMUG00000004286	PTPMT1	protein tyrosine phosphatase, mitochondrial 1 [Source:HGNC Symbol;Acc:HGNC:26965]	Diploid	Diploid
ENSG00000142156	COL6A1	collagen, type VI, alpha 1 [Source:HGNC Symbol;Acc:2211]	ENSMMUG00000000544	COL6A1	collagen type VI alpha 1 chain [Source:HGNC Symbol;Acc:HGNC:2211]	Diploid	Diploid
ENSG00000112164	GLP1R	glucagon-like peptide 1 receptor [Source:HGNC Symbol;Acc:4324]	ENSMMUG00000023387	GLP1R	glucagon like peptide 1 receptor [Source:HGNC Symbol;Acc:HGNC:4324]	Diploid	Diploid
ENSG00000129691	ASH2L	ash2 (absent, small, or homeotic)-like (Drosophila) [Source:HGNC Symbol;Acc:744]	ENSMMUG00000013675	ASH2L	ASH2 like histone lysine methyltransferase complex subunit [Source:HGNC Symbol;Acc:HGNC:744]	Diploid	Diploid
ENSG00000105135	ILVBL	ilvB (bacterial acetolactate synthase)-like [Source:HGNC Symbol;Acc:6041]	ENSMMUG00000007729	ILVBL	ilvB acetolactate synthase like [Source:HGNC Symbol;Acc:HGNC:6041]	Diploid	Diploid
ENSG00000023287	RB1CC1	RB1-inducible coiled-coil 1 [Source:HGNC Symbol;Acc:15574]	ENSMMUG00000009990	RB1CC1	RB1 inducible coiled-coil 1 [Source:HGNC Symbol;Acc:HGNC:15574]	Diploid	Diploid
ENSG00000204381	LAYN	layilin [Source:HGNC Symbol;Acc:29471]	ENSMMUG00000030915	LAYN	layilin [Source:HGNC Symbol;Acc:HGNC:29471]	Diploid	Diploid
ENSG00000151657	KIN	KIN, antigenic determinant of recA protein homolog (mouse) [Source:HGNC Symbol;Acc:6327]	ENSMMUG00000009206	KIN	Kin17 DNA and RNA binding protein [Source:HGNC Symbol;Acc:HGNC:6327]	Diploid	Diploid
ENSG00000172568	FNDC9	fibronectin type III domain containing 9 [Source:HGNC Symbol;Acc:33547]	ENSMMUG00000011007	FNDC9	fibronectin type III domain containing 9 [Source:HGNC Symbol;Acc:HGNC:33547]	Diploid	Diploid
ENSG00000177409	SAMD9L	sterile alpha motif domain containing 9-like [Source:HGNC Symbol;Acc:1349]	ENSMMUG00000020803	SAMD9L	sterile alpha motif domain containing 9 like [Source:HGNC Symbol;Acc:HGNC:1349]	Diploid	Diploid
ENSG00000184867	ARMCX2	armadillo repeat containing, X-linked 2 [Source:HGNC Symbol;Acc:16869]	ENSMMUG00000015656	ARMCX2	armadillo repeat containing, X-linked 2 [Source:HGNC Symbol;Acc:HGNC:16869]	Diploid	Diploid
ENSG00000105371	ICAM4	intercellular adhesion molecule 4 (Landsteiner-Wiener blood group) [Source:HGNC Symbol;Acc:5347]	ENSMMUG00000009343	ICAM4	intercellular adhesion molecule 4 (Landsteiner-Wiener blood group) [Source:HGNC Symbol;Acc:HGNC:5347]	Diploid	Diploid
ENSG00000105364	MRPL4	mitochondrial ribosomal protein L4 [Source:HGNC Symbol;Acc:14276]	ENSMMUG00000001219	MRPL4	mitochondrial ribosomal protein L4 [Source:HGNC Symbol;Acc:HGNC:14276]	Diploid	Diploid
ENSG00000107020	PLGRKT	plasminogen receptor, C-terminal lysine transmembrane protein [Source:HGNC Symbol;Acc:23633]	ENSMMUG00000006197	PLGRKT	Macaca mulatta plasminogen receptor, C-terminal lysine transmembrane protein (PLGRKT), mRNA. [Source:RefSeq mRNA;Acc:NM_001257744]	Diploid	Diploid
ENSG00000136877	FPGS	folylpolyglutamate synthase [Source:HGNC Symbol;Acc:3824]	ENSMMUG00000018506	FPGS	folylpolyglutamate synthase [Source:HGNC Symbol;Acc:HGNC:3824]	Diploid	Diploid
ENSG00000145723	GIN1	gypsy retrotransposon integrase 1 [Source:HGNC Symbol;Acc:25959]	ENSMMUG00000007786	GIN1	gypsy retrotransposon integrase-like protein 1 [Source:RefSeq peptide;Acc:NP_001181013]	Diploid	Diploid
ENSG00000147434	CHRNA6	cholinergic receptor, nicotinic, alpha 6 (neuronal) [Source:HGNC Symbol;Acc:15963]	ENSMMUG00000000163	CHRNA6	cholinergic receptor nicotinic alpha 6 subunit [Source:HGNC Symbol;Acc:HGNC:15963]	Diploid	Diploid
ENSG00000070159	PTPN3	protein tyrosine phosphatase, non-receptor type 3 [Source:HGNC Symbol;Acc:9655]	ENSMMUG00000001250	PTPN3	protein tyrosine phosphatase, non-receptor type 3 [Source:HGNC Symbol;Acc:HGNC:9655]	Diploid	Diploid
ENSG00000101871	MID1	midline 1 (Opitz/BBB syndrome) [Source:HGNC Symbol;Acc:7095]	ENSMMUG00000020179	MID1	midline 1 [Source:HGNC Symbol;Acc:HGNC:7095]	Diploid	Diploid
ENSG00000169299	PGM2	phosphoglucomutase 2 [Source:HGNC Symbol;Acc:8906]	ENSMMUG00000000232	PGM2	phosphoglucomutase 2 [Source:HGNC Symbol;Acc:HGNC:8906]	Diploid	Diploid
ENSG00000136891	TEX10	testis expressed 10 [Source:HGNC Symbol;Acc:25988]	ENSMMUG00000001526	TEX10	testis expressed 10 [Source:HGNC Symbol;Acc:HGNC:25988]	Diploid	Diploid
ENSG00000112218	GPR63	G protein-coupled receptor 63 [Source:HGNC Symbol;Acc:13302]	ENSMMUG00000045116	GPR63	G protein-coupled receptor 63 [Source:HGNC Symbol;Acc:HGNC:13302]	Diploid	Diploid
ENSG00000146013	GFRA3	GDNF family receptor alpha 3 [Source:HGNC Symbol;Acc:4245]	ENSMMUG00000013272	GFRA3	GDNF family receptor alpha 3 [Source:HGNC Symbol;Acc:HGNC:4245]	Diploid	Diploid
ENSG00000123094	RASSF8	Ras association (RalGDS/AF-6) domain family (N-terminal) member 8 [Source:HGNC Symbol;Acc:13232]	ENSMMUG00000018385	RASSF8	Ras association domain family member 8 [Source:HGNC Symbol;Acc:HGNC:13232]	Diploid	Diploid
ENSG00000126549	STATH	statherin [Source:HGNC Symbol;Acc:11369]	ENSMMUG00000048823	STATH	statherin [Source:HGNC Symbol;Acc:HGNC:11369]	Diploid	Diploid
ENSG00000038427	VCAN	versican [Source:HGNC Symbol;Acc:2464]	ENSMMUG00000011513	VCAN	versican [Source:HGNC Symbol;Acc:HGNC:2464]	Diploid	Diploid
ENSG00000172803	SNX32	sorting nexin 32 [Source:HGNC Symbol;Acc:26423]	ENSMMUG00000019017	SNX32	sorting nexin 32 [Source:HGNC Symbol;Acc:HGNC:26423]	Diploid	Diploid
ENSG00000166128	RAB8B	RAB8B, member RAS oncogene family [Source:HGNC Symbol;Acc:30273]	ENSMMUG00000013460	RAB8B	RAB8B, member RAS oncogene family [Source:HGNC Symbol;Acc:HGNC:30273]	Diploid	Diploid
ENSG00000090339	ICAM1	intercellular adhesion molecule 1 [Source:HGNC Symbol;Acc:5344]	ENSMMUG00000014896	ICAM1	intercellular adhesion molecule 1 [Source:HGNC Symbol;Acc:HGNC:5344]	Diploid	Diploid
ENSG00000161526	SAP30BP	SAP30 binding protein [Source:HGNC Symbol;Acc:30785]	ENSMMUG00000021636	SAP30BP	SAP30 binding protein [Source:HGNC Symbol;Acc:HGNC:30785]	Diploid	Diploid
ENSG00000175216	CKAP5	cytoskeleton associated protein 5 [Source:HGNC Symbol;Acc:28959]	ENSMMUG00000003631	CKAP5	cytoskeleton associated protein 5 [Source:HGNC Symbol;Acc:HGNC:28959]	Diploid	Diploid
ENSG00000140465	CYP1A1	cytochrome P450, family 1, subfamily A, polypeptide 1 [Source:HGNC Symbol;Acc:2595]	ENSMMUG00000022481	CYP1A1	cytochrome P450 family 1 subfamily A member 1 [Source:HGNC Symbol;Acc:HGNC:2595]	Diploid	Diploid
ENSG00000029534	ANK1	ankyrin 1, erythrocytic [Source:HGNC Symbol;Acc:492]	ENSMMUG00000014726	ANK1	ankyrin 1 [Source:HGNC Symbol;Acc:HGNC:492]	Diploid	Diploid
ENSG00000172732	MUS81	MUS81 structure-specific endonuclease subunit [Source:HGNC Symbol;Acc:29814]	ENSMMUG00000019014	MUS81	MUS81 structure-specific endonuclease subunit [Source:HGNC Symbol;Acc:HGNC:29814]	Diploid	Diploid
ENSG00000038382	TRIO	trio Rho guanine nucleotide exchange factor [Source:HGNC Symbol;Acc:12303]	ENSMMUG00000015489	TRIO	trio Rho guanine nucleotide exchange factor [Source:HGNC Symbol;Acc:HGNC:12303]	Diploid	Diploid
ENSG00000124019	FAM124B	family with sequence similarity 124B [Source:HGNC Symbol;Acc:26224]	ENSMMUG00000022899	FAM124B	family with sequence similarity 124 member B [Source:HGNC Symbol;Acc:HGNC:26224]	Diploid	Diploid
ENSG00000167699	GLOD4	glyoxalase domain containing 4 [Source:HGNC Symbol;Acc:14111]	ENSMMUG00000011417	GLOD4	glyoxalase domain containing 4 [Source:HGNC Symbol;Acc:HGNC:14111]	Diploid	Diploid
ENSG00000164049	FBXW12	F-box and WD repeat domain containing 12 [Source:HGNC Symbol;Acc:20729]	ENSMMUG00000003079	FBXW12	F-box and WD repeat domain containing 12 [Source:HGNC Symbol;Acc:HGNC:20729]	Diploid	Diploid
ENSG00000158578	ALAS2	aminolevulinate, delta-, synthase 2 [Source:HGNC Symbol;Acc:397]	ENSMMUG00000008429	ALAS2	5'-aminolevulinate synthase 2 [Source:HGNC Symbol;Acc:HGNC:397]	Diploid	Diploid
ENSG00000146109	ABT1	activator of basal transcription 1 [Source:HGNC Symbol;Acc:17369]	ENSMMUG00000006914	ABT1	activator of basal transcription 1 [Source:HGNC Symbol;Acc:HGNC:17369]	Diploid	Diploid
ENSG00000137078	SIT1	signaling threshold regulating transmembrane adaptor 1 [Source:HGNC Symbol;Acc:17710]	ENSMMUG00000047202	SIT1	signaling threshold regulating transmembrane adaptor 1 [Source:HGNC Symbol;Acc:HGNC:17710]	Diploid	Diploid
ENSG00000185246	PRPF39	pre-mRNA processing factor 39 [Source:HGNC Symbol;Acc:20314]	ENSMMUG00000010862	PRPF39	pre-mRNA processing factor 39 [Source:HGNC Symbol;Acc:HGNC:20314]	Diploid	Diploid
ENSG00000119408	NEK6	NIMA-related kinase 6 [Source:HGNC Symbol;Acc:7749]	ENSMMUG00000007354	NEK6	NIMA related kinase 6 [Source:HGNC Symbol;Acc:HGNC:7749]	Diploid	Diploid
ENSG00000174429	ABRA	actin-binding Rho activating protein [Source:HGNC Symbol;Acc:30655]	ENSMMUG00000017850	ABRA	actin binding Rho activating protein [Source:HGNC Symbol;Acc:HGNC:30655]	Diploid	Diploid
ENSG00000144040	SFXN5	sideroflexin 5 [Source:HGNC Symbol;Acc:16073]	ENSMMUG00000002300	SFXN5	sideroflexin 5 [Source:HGNC Symbol;Acc:HGNC:16073]	Diploid	Diploid
ENSG00000154975	CA10	carbonic anhydrase X [Source:HGNC Symbol;Acc:1369]	ENSMMUG00000013737	CA10	carbonic anhydrase 10 [Source:HGNC Symbol;Acc:HGNC:1369]	Diploid	Diploid
ENSG00000063515	GSC2	goosecoid homeobox 2 [Source:HGNC Symbol;Acc:4613]	ENSMMUG00000020988	GSC2	goosecoid homeobox 2 [Source:HGNC Symbol;Acc:HGNC:4613]	Diploid	Diploid
ENSG00000046647	GEMIN8	gem (nuclear organelle) associated protein 8 [Source:HGNC Symbol;Acc:26044]	ENSMMUG00000013595	GEMIN8	gem nuclear organelle associated protein 8 [Source:HGNC Symbol;Acc:HGNC:26044]	Diploid	Diploid
ENSG00000169188	APEX2	APEX nuclease (apurinic/apyrimidinic endonuclease) 2 [Source:HGNC Symbol;Acc:17889]	ENSMMUG00000008428	APEX2	apurinic/apyrimidinic endodeoxyribonuclease 2 [Source:HGNC Symbol;Acc:HGNC:17889]	Diploid	Diploid
ENSG00000130985	UBA1	ubiquitin-like modifier activating enzyme 1 [Source:HGNC Symbol;Acc:12469]	ENSMMUG00000017428	UBA1	ubiquitin like modifier activating enzyme 1 [Source:HGNC Symbol;Acc:HGNC:12469]	Diploid	Diploid
ENSG00000135926	TMBIM1	transmembrane BAX inhibitor motif containing 1 [Source:HGNC Symbol;Acc:23410]	ENSMMUG00000022817	TMBIM1	transmembrane BAX inhibitor motif containing 1 [Source:HGNC Symbol;Acc:HGNC:23410]	Diploid	Diploid
ENSG00000138613	APH1B	APH1B gamma secretase subunit [Source:HGNC Symbol;Acc:24080]	ENSMMUG00000017856	APH1B	aph-1 homolog B, gamma-secretase subunit [Source:HGNC Symbol;Acc:HGNC:24080]	Diploid	Diploid
ENSG00000106733	NMRK1	nicotinamide riboside kinase 1 [Source:HGNC Symbol;Acc:26057]	ENSMMUG00000010400	NMRK1	nicotinamide riboside kinase 1 [Source:HGNC Symbol;Acc:HGNC:26057]	Diploid	Diploid
ENSG00000120217	CD274	CD274 molecule [Source:HGNC Symbol;Acc:17635]	ENSMMUG00000012235	CD274	CD274 molecule [Source:HGNC Symbol;Acc:HGNC:17635]	Diploid	Diploid
ENSG00000126458	RRAS	related RAS viral (r-ras) oncogene homolog [Source:HGNC Symbol;Acc:10447]	ENSMMUG00000028733	RRAS	RAS related [Source:HGNC Symbol;Acc:HGNC:10447]	Diploid	Diploid
ENSG00000036257	CUL3	cullin 3 [Source:HGNC Symbol;Acc:2553]	ENSMMUG00000022259	CUL3	cullin 3 [Source:HGNC Symbol;Acc:HGNC:2553]	Diploid	Diploid
ENSG00000230873	STMND1	stathmin domain containing 1 [Source:HGNC Symbol;Acc:44668]	ENSMMUG00000002558	STMND1	stathmin domain containing 1 [Source:HGNC Symbol;Acc:HGNC:44668]	Diploid	Diploid
ENSG00000167526	RPL13	ribosomal protein L13 [Source:HGNC Symbol;Acc:10303]	ENSMMUG00000017928			Diploid	Diploid
ENSG00000183891	TTC32	tetratricopeptide repeat domain 32 [Source:HGNC Symbol;Acc:32954]	ENSMMUG00000001570			Diploid	Diploid
ENSG00000112183	RBM24	RNA binding motif protein 24 [Source:HGNC Symbol;Acc:21539]	ENSMMUG00000011384	RBM24	RNA binding motif protein 24 [Source:HGNC Symbol;Acc:HGNC:21539]	Diploid	Diploid
ENSG00000172638	EFEMP2	EGF containing fibulin-like extracellular matrix protein 2 [Source:HGNC Symbol;Acc:3219]	ENSMMUG00000019012	EFEMP2	EGF containing fibulin like extracellular matrix protein 2 [Source:HGNC Symbol;Acc:HGNC:3219]	Diploid	Diploid
ENSG00000090238	YPEL3	yippee-like 3 (Drosophila) [Source:HGNC Symbol;Acc:18327]	ENSMMUG00000000980	YPEL3	yippee like 3 [Source:HGNC Symbol;Acc:HGNC:18327]	Diploid	Diploid
ENSG00000007392	LUC7L	LUC7-like (S. cerevisiae) [Source:HGNC Symbol;Acc:6723]	ENSMMUG00000000596	LUC7L	LUC7 like [Source:HGNC Symbol;Acc:HGNC:6723]	Diploid	Diploid
ENSG00000166562	SEC11C	SEC11 homolog C (S. cerevisiae) [Source:HGNC Symbol;Acc:23400]	ENSMMUG00000004408	SEC11C	SEC11 homolog C, signal peptidase complex subunit [Source:HGNC Symbol;Acc:HGNC:23400]	Diploid	Diploid
ENSG00000111711	GOLT1B	golgi transport 1B [Source:HGNC Symbol;Acc:20175]	ENSMMUG00000040133	GOLT1B	golgi transport 1B [Source:HGNC Symbol;Acc:HGNC:20175]	Diploid	Diploid
ENSG00000140650	PMM2	phosphomannomutase 2 [Source:HGNC Symbol;Acc:9115]	ENSMMUG00000022714	PMM2	phosphomannomutase 2 [Source:HGNC Symbol;Acc:HGNC:9115]	Diploid	Diploid
ENSG00000188158	NHS	Nance-Horan syndrome (congenital cataracts and dental anomalies) [Source:HGNC Symbol;Acc:7820]	ENSMMUG00000012894	NHS	NHS actin remodeling regulator [Source:HGNC Symbol;Acc:HGNC:7820]	Diploid	Diploid
ENSG00000115657	ABCB6	ATP-binding cassette, sub-family B (MDR/TAP), member 6 [Source:HGNC Symbol;Acc:47]	ENSMMUG00000019616	ABCB6	ATP binding cassette subfamily B member 6 (Langereis blood group) [Source:HGNC Symbol;Acc:HGNC:47]	Diploid	Diploid
ENSG00000136141	LRCH1	leucine-rich repeats and calponin homology (CH) domain containing 1 [Source:HGNC Symbol;Acc:20309]	ENSMMUG00000016293	LRCH1	leucine rich repeats and calponin homology domain containing 1 [Source:HGNC Symbol;Acc:HGNC:20309]	Diploid	Diploid
ENSG00000108469	RECQL5	RecQ protein-like 5 [Source:HGNC Symbol;Acc:9950]	ENSMMUG00000021635	RECQL5	RecQ like helicase 5 [Source:HGNC Symbol;Acc:HGNC:9950]	Diploid	Diploid
ENSG00000175376	EIF1AD	eukaryotic translation initiation factor 1A domain containing [Source:HGNC Symbol;Acc:28147]	ENSMMUG00000019115	EIF1AD	eukaryotic translation initiation factor 1A domain containing [Source:HGNC Symbol;Acc:HGNC:28147]	Diploid	Diploid
ENSG00000075292	ZNF638	zinc finger protein 638 [Source:HGNC Symbol;Acc:17894]	ENSMMUG00000007175	ZNF638	zinc finger protein 638 [Source:HGNC Symbol;Acc:HGNC:17894]	Diploid	Diploid
ENSG00000135631	RAB11FIP5	RAB11 family interacting protein 5 (class I) [Source:HGNC Symbol;Acc:24845]	ENSMMUG00000002301			Diploid	Diploid
ENSG00000111846	GCNT2	glucosaminyl (N-acetyl) transferase 2, I-branching enzyme (I blood group) [Source:HGNC Symbol;Acc:4204]	ENSMMUG00000020132	GCNT2	glucosaminyl (N-acetyl) transferase 2, I-branching enzyme (I blood group) [Source:HGNC Symbol;Acc:HGNC:4204]	Diploid	Diploid
ENSG00000100075	SLC25A1	solute carrier family 25 (mitochondrial carrier; citrate transporter), member 1 [Source:HGNC Symbol;Acc:10979]	ENSMMUG00000005431	SLC25A1	solute carrier family 25 member 1 [Source:HGNC Symbol;Acc:HGNC:10979]	Diploid	Diploid
ENSG00000174482	LINGO2	leucine rich repeat and Ig domain containing 2 [Source:HGNC Symbol;Acc:21207]	ENSMMUG00000017199	LINGO2	leucine rich repeat and Ig domain containing 2 [Source:HGNC Symbol;Acc:HGNC:21207]	Diploid	Diploid
ENSG00000154930	ACSS1	acyl-CoA synthetase short-chain family member 1 [Source:HGNC Symbol;Acc:16091]	ENSMMUG00000020597	ACSS1	acyl-CoA synthetase short chain family member 1 [Source:HGNC Symbol;Acc:HGNC:16091]	Diploid	Diploid
ENSG00000104889	RNASEH2A	ribonuclease H2, subunit A [Source:HGNC Symbol;Acc:18518]	ENSMMUG00000005690	RNASEH2A	ribonuclease H2 subunit A [Source:HGNC Symbol;Acc:HGNC:18518]	Diploid	Diploid
ENSG00000183729	NPBWR1	neuropeptides B/W receptor 1 [Source:HGNC Symbol;Acc:4522]	ENSMMUG00000020909	NPBWR1	neuropeptides B and W receptor 1 [Source:HGNC Symbol;Acc:HGNC:4522]	Diploid	Diploid
ENSG00000153048	CARHSP1	calcium regulated heat stable protein 1, 24kDa [Source:HGNC Symbol;Acc:17150]	ENSMMUG00000047806	CARHSP1	calcium regulated heat stable protein 1 [Source:HGNC Symbol;Acc:HGNC:17150]	Diploid	Diploid
ENSG00000124568	SLC17A1	solute carrier family 17 (organic anion transporter), member 1 [Source:HGNC Symbol;Acc:10929]	ENSMMUG00000002582	SLC17A1	solute carrier family 17 member 1 [Source:HGNC Symbol;Acc:HGNC:10929]	Diploid	Diploid
ENSG00000104499	GML	glycosylphosphatidylinositol anchored molecule like [Source:HGNC Symbol;Acc:4375]	ENSMMUG00000013627	GML	glycosylphosphatidylinositol anchored molecule like [Source:HGNC Symbol;Acc:HGNC:4375]	Diploid	Diploid
ENSG00000134326	CMPK2	cytidine monophosphate (UMP-CMP) kinase 2, mitochondrial [Source:HGNC Symbol;Acc:27015]	ENSMMUG00000015968	CMPK2	cytidine/uridine monophosphate kinase 2 [Source:HGNC Symbol;Acc:HGNC:27015]	Diploid	Diploid
ENSG00000134873	CLDN10	claudin 10 [Source:HGNC Symbol;Acc:2033]	ENSMMUG00000009721	CLDN10	claudin 10 [Source:HGNC Symbol;Acc:HGNC:2033]	Diploid	Diploid
ENSG00000135074	ADAM19	ADAM metallopeptidase domain 19 [Source:HGNC Symbol;Acc:197]	ENSMMUG00000021549	ADAM19	ADAM metallopeptidase domain 19 [Source:HGNC Symbol;Acc:HGNC:197]	Diploid	Diploid
ENSG00000187049	TMEM216	transmembrane protein 216 [Source:HGNC Symbol;Acc:25018]	ENSMMUG00000002365	TMEM216	transmembrane protein 216 [Source:HGNC Symbol;Acc:HGNC:25018]	Diploid	Diploid
ENSG00000132026	RTBDN	retbindin [Source:HGNC Symbol;Acc:30310]	ENSMMUG00000007322	RTBDN	retbindin [Source:HGNC Symbol;Acc:HGNC:30310]	Diploid	Diploid
ENSG00000184014	DENND5A	DENN/MADD domain containing 5A [Source:HGNC Symbol;Acc:19344]	ENSMMUG00000021142	DENND5A	DENN domain containing 5A [Source:HGNC Symbol;Acc:HGNC:19344]	Diploid	Diploid
ENSG00000111203	ITFG2	integrin alpha FG-GAP repeat containing 2 [Source:HGNC Symbol;Acc:30879]	ENSMMUG00000007411	ITFG2	integrin alpha FG-GAP repeat containing 2 [Source:HGNC Symbol;Acc:HGNC:30879]	Diploid	Diploid
ENSG00000134321	RSAD2	radical S-adenosyl methionine domain containing 2 [Source:HGNC Symbol;Acc:30908]	ENSMMUG00000015969	RSAD2	radical S-adenosyl methionine domain containing 2 [Source:HGNC Symbol;Acc:HGNC:30908]	Diploid	Diploid
ENSG00000101138	CSTF1	cleavage stimulation factor, 3' pre-RNA, subunit 1, 50kDa [Source:HGNC Symbol;Acc:2483]	ENSMMUG00000000072	CSTF1	cleavage stimulation factor subunit 1 [Source:HGNC Symbol;Acc:HGNC:2483]	Diploid	Diploid
ENSG00000023228	NDUFS1	NADH dehydrogenase (ubiquinone) Fe-S protein 1, 75kDa (NADH-coenzyme Q reductase) [Source:HGNC Symbol;Acc:7707]	ENSMMUG00000016788	NDUFS1	NADH:ubiquinone oxidoreductase core subunit S1 [Source:HGNC Symbol;Acc:HGNC:7707]	Diploid	Diploid
ENSG00000171262	FAM98B	family with sequence similarity 98, member B [Source:HGNC Symbol;Acc:26773]	ENSMMUG00000018332	FAM98B	family with sequence similarity 98 member B [Source:HGNC Symbol;Acc:HGNC:26773]	Diploid	Diploid
ENSG00000133398	MED10	mediator complex subunit 10 [Source:HGNC Symbol;Acc:28760]	ENSMMUG00000040822	MED10	mediator complex subunit 10 [Source:HGNC Symbol;Acc:HGNC:28760]	Diploid	Diploid
ENSG00000163586	FABP1	fatty acid binding protein 1, liver [Source:HGNC Symbol;Acc:3555]	ENSMMUG00000042446	FABP1	fatty acid binding protein 1 [Source:HGNC Symbol;Acc:HGNC:3555]	Diploid	Diploid
ENSG00000102886	GDPD3	glycerophosphodiester phosphodiesterase domain containing 3 [Source:HGNC Symbol;Acc:28638]	ENSMMUG00000029164	GDPD3	glycerophosphodiester phosphodiesterase domain containing 3 [Source:HGNC Symbol;Acc:HGNC:28638]	Diploid	Diploid
ENSG00000170289	CNGB3	cyclic nucleotide gated channel beta 3 [Source:HGNC Symbol;Acc:2153]	ENSMMUG00000017889	CNGB3	cyclic nucleotide gated channel beta 3 [Source:HGNC Symbol;Acc:HGNC:2153]	Diploid	Diploid
ENSG00000101958	GLRA2	glycine receptor, alpha 2 [Source:HGNC Symbol;Acc:4327]	ENSMMUG00000003482	GLRA2	glycine receptor alpha 2 [Source:HGNC Symbol;Acc:HGNC:4327]	Diploid	Diploid
ENSG00000154188	ANGPT1	angiopoietin 1 [Source:HGNC Symbol;Acc:484]	ENSMMUG00000017745	ANGPT1	angiopoietin-1 precursor [Source:RefSeq peptide;Acc:NP_001253045]	Diploid	Diploid
ENSG00000096088	PGC	progastricsin (pepsinogen C) [Source:HGNC Symbol;Acc:8890]	ENSMMUG00000048466	PGC	progastricsin [Source:HGNC Symbol;Acc:HGNC:8890]	Diploid	Diploid
ENSG00000182985	CADM1	cell adhesion molecule 1 [Source:HGNC Symbol;Acc:5951]	ENSMMUG00000021628	CADM1	cell adhesion molecule 1 [Source:HGNC Symbol;Acc:HGNC:5951]	Diploid	Diploid
ENSG00000205186	FABP9	fatty acid binding protein 9, testis [Source:HGNC Symbol;Acc:3563]	ENSMMUG00000020095	FABP9	fatty acid binding protein 9 [Source:HGNC Symbol;Acc:HGNC:3563]	Diploid	Diploid
ENSG00000107249	GLIS3	GLIS family zinc finger 3 [Source:HGNC Symbol;Acc:28510]	ENSMMUG00000031741			Diploid	Diploid
ENSG00000147588	PMP2	peripheral myelin protein 2 [Source:HGNC Symbol;Acc:9117]	ENSMMUG00000047024	PMP2	peripheral myelin protein 2 [Source:HGNC Symbol;Acc:HGNC:9117]	Diploid	Diploid
ENSG00000070985	TRPM5	transient receptor potential cation channel, subfamily M, member 5 [Source:HGNC Symbol;Acc:14323]	ENSMMUG00000004773	TRPM5	transient receptor potential cation channel subfamily M member 5 [Source:HGNC Symbol;Acc:HGNC:14323]	Diploid	Diploid
ENSG00000087088	BAX	BCL2-associated X protein [Source:HGNC Symbol;Acc:959]	ENSMMUG00000003907	BAX	BCL2 associated X, apoptosis regulator [Source:HGNC Symbol;Acc:HGNC:959]	Diploid	Diploid
ENSG00000177873	ZNF619	zinc finger protein 619 [Source:HGNC Symbol;Acc:26910]	ENSMMUG00000009437	ZNF619	zinc finger protein 619 [Source:HGNC Symbol;Acc:HGNC:26910]	Diploid	Diploid
ENSG00000090924	PLEKHG2	pleckstrin homology domain containing, family G (with RhoGef domain) member 2 [Source:HGNC Symbol;Acc:29515]	ENSMMUG00000019369	PLEKHG2	pleckstrin homology and RhoGEF domain containing G2 [Source:HGNC Symbol;Acc:HGNC:29515]	Diploid	Diploid
ENSG00000170323	FABP4	fatty acid binding protein 4, adipocyte [Source:HGNC Symbol;Acc:3559]	ENSMMUG00000041192	FABP4	fatty acid binding protein 4 [Source:HGNC Symbol;Acc:HGNC:3559]	Diploid	Diploid
ENSG00000112658	SRF	serum response factor (c-fos serum response element-binding transcription factor) [Source:HGNC Symbol;Acc:11291]	ENSMMUG00000000033	SRF	serum response factor [Source:HGNC Symbol;Acc:HGNC:11291]	Diploid	Diploid
ENSG00000020426	MNAT1	MNAT CDK-activating kinase assembly factor 1 [Source:HGNC Symbol;Acc:7181]	ENSMMUG00000001642	MNAT1	MNAT1, CDK activating kinase assembly factor [Source:HGNC Symbol;Acc:HGNC:7181]	Diploid	Diploid
ENSG00000103121	CMC2	C-x(9)-C motif containing 2 [Source:HGNC Symbol;Acc:24447]	ENSMMUG00000013081	CMC2	C-X9-C motif containing 2 [Source:HGNC Symbol;Acc:HGNC:24447]	Diploid	Diploid
ENSG00000144115	THNSL2	threonine synthase-like 2 (S. cerevisiae) [Source:HGNC Symbol;Acc:25602]	ENSMMUG00000008056	THNSL2	threonine synthase like 2 [Source:HGNC Symbol;Acc:HGNC:25602]	Diploid	Diploid
ENSG00000151065	DCP1B	decapping mRNA 1B [Source:HGNC Symbol;Acc:24451]	ENSMMUG00000010992	DCP1B	decapping mRNA 1B [Source:HGNC Symbol;Acc:HGNC:24451]	Diploid	Diploid
ENSG00000160953	MUM1	melanoma associated antigen (mutated) 1 [Source:HGNC Symbol;Acc:29641]	ENSMMUG00000003043	MUM1	melanoma associated antigen (mutated) 1 [Source:HGNC Symbol;Acc:HGNC:29641]	Diploid	Diploid
ENSG00000082556	OPRK1	opioid receptor, kappa 1 [Source:HGNC Symbol;Acc:8154]	ENSMMUG00000038011	OPRK1	opioid receptor kappa 1 [Source:HGNC Symbol;Acc:HGNC:8154]	Diploid	Diploid
ENSG00000159884	CCDC107	coiled-coil domain containing 107 [Source:HGNC Symbol;Acc:28465]	ENSMMUG00000016327	CCDC107	coiled-coil domain containing 107 [Source:HGNC Symbol;Acc:HGNC:28465]	Diploid	Diploid
ENSG00000140505	CYP1A2	cytochrome P450, family 1, subfamily A, polypeptide 2 [Source:HGNC Symbol;Acc:2596]	ENSMMUG00000021832	CYP1A2	cytochrome P450 family 1 subfamily A member 2 [Source:HGNC Symbol;Acc:HGNC:2596]	Diploid	Diploid
ENSG00000102100	SLC35A2	solute carrier family 35 (UDP-galactose transporter), member A2 [Source:HGNC Symbol;Acc:11022]	ENSMMUG00000004553	SLC35A2	UDP-galactose translocator [Source:RefSeq peptide;Acc:NP_001252765]	Diploid	Diploid
ENSG00000173068	BNC2	basonuclin 2 [Source:HGNC Symbol;Acc:30988]	ENSMMUG00000001141	BNC2	basonuclin 2 [Source:HGNC Symbol;Acc:HGNC:30988]	Diploid	Diploid
ENSG00000115232	ITGA4	integrin, alpha 4 (antigen CD49D, alpha 4 subunit of VLA-4 receptor) [Source:HGNC Symbol;Acc:6140]	ENSMMUG00000000300	ITGA4	integrin subunit alpha 4 [Source:HGNC Symbol;Acc:HGNC:6140]	Diploid	Diploid
ENSG00000128482	RNF112	ring finger protein 112 [Source:HGNC Symbol;Acc:12968]	ENSMMUG00000008540	RNF112	ring finger protein 112 [Source:HGNC Symbol;Acc:HGNC:12968]	Diploid	Diploid
ENSG00000164266	SPINK1	serine peptidase inhibitor, Kazal type 1 [Source:HGNC Symbol;Acc:11244]	ENSMMUG00000017227	SPINK1	serine peptidase inhibitor, Kazal type 1 [Source:HGNC Symbol;Acc:HGNC:11244]	Diploid	Diploid
ENSG00000053702	NRIP2	nuclear receptor interacting protein 2 [Source:HGNC Symbol;Acc:23078]	ENSMMUG00000007424	NRIP2	nuclear receptor interacting protein 2 [Source:HGNC Symbol;Acc:HGNC:23078]	Diploid	Diploid
ENSG00000186231	KLHL32	kelch-like family member 32 [Source:HGNC Symbol;Acc:21221]	ENSMMUG00000005093	KLHL32	kelch like family member 32 [Source:HGNC Symbol;Acc:HGNC:21221]	Diploid	Diploid
ENSG00000108219	TSPAN14	tetraspanin 14 [Source:HGNC Symbol;Acc:23303]	ENSMMUG00000013895	TSPAN14	tetraspanin 14 [Source:HGNC Symbol;Acc:HGNC:23303]	Diploid	Diploid
ENSG00000137135	ARHGEF39	Rho guanine nucleotide exchange factor (GEF) 39 [Source:HGNC Symbol;Acc:25909]	ENSMMUG00000016323	ARHGEF39	Rho guanine nucleotide exchange factor 39 [Source:HGNC Symbol;Acc:HGNC:25909]	Diploid	Diploid
ENSG00000178033	FAM26E	family with sequence similarity 26, member E [Source:HGNC Symbol;Acc:21568]	ENSMMUG00000007412	CALHM5	calcium homeostasis modulator family member 5 [Source:HGNC Symbol;Acc:HGNC:21568]	Diploid	Diploid
ENSG00000139974	SLC38A6	solute carrier family 38, member 6 [Source:HGNC Symbol;Acc:19863]	ENSMMUG00000013612	SLC38A6	solute carrier family 38 member 6 [Source:HGNC Symbol;Acc:HGNC:19863]	Diploid	Diploid
ENSG00000095066	HOOK2	hook microtubule-tethering protein 2 [Source:HGNC Symbol;Acc:19885]	ENSMMUG00000005686	HOOK2	hook microtubule tethering protein 2 [Source:HGNC Symbol;Acc:HGNC:19885]	Diploid	Diploid
ENSG00000164451	FAM26D	family with sequence similarity 26, member D [Source:HGNC Symbol;Acc:21094]	ENSMMUG00000007414	CALHM4	calcium homeostasis modulator family member 4 [Source:HGNC Symbol;Acc:HGNC:21094]	Diploid	Diploid
ENSG00000148606	POLR3A	polymerase (RNA) III (DNA directed) polypeptide A, 155kDa [Source:HGNC Symbol;Acc:30074]	ENSMMUG00000005514	POLR3A	RNA polymerase III subunit A [Source:HGNC Symbol;Acc:HGNC:30074]	Diploid	Diploid
ENSG00000102195	GPR50	G protein-coupled receptor 50 [Source:HGNC Symbol;Acc:4506]	ENSMMUG00000001620	GPR50	G protein-coupled receptor 50 [Source:HGNC Symbol;Acc:HGNC:4506]	Diploid	Diploid
ENSG00000178473	UCN3	urocortin 3 [Source:HGNC Symbol;Acc:17781]	ENSMMUG00000017441	UCN3	urocortin 3 [Source:HGNC Symbol;Acc:HGNC:17781]	Diploid	Diploid
ENSG00000173626	TRAPPC3L	trafficking protein particle complex 3-like [Source:HGNC Symbol;Acc:21090]	ENSMMUG00000007413	TRAPPC3L	trafficking protein particle complex 3 like [Source:HGNC Symbol;Acc:HGNC:21090]	Diploid	Diploid
ENSG00000188992	LIPI	lipase, member I [Source:HGNC Symbol;Acc:18821]	ENSMMUG00000037492	LIPI	lipase I [Source:HGNC Symbol;Acc:HGNC:18821]	Diploid	Diploid
ENSG00000215218	UBE2QL1	ubiquitin-conjugating enzyme E2Q family-like 1 [Source:HGNC Symbol;Acc:37269]	ENSMMUG00000046991	UBE2QL1	ubiquitin conjugating enzyme E2 Q family like 1 [Source:HGNC Symbol;Acc:HGNC:37269]	Diploid	Diploid
ENSG00000121680	PEX16	peroxisomal biogenesis factor 16 [Source:HGNC Symbol;Acc:8857]	ENSMMUG00000008878	PEX16	peroxisomal biogenesis factor 16 [Source:HGNC Symbol;Acc:HGNC:8857]	Diploid	Diploid
ENSG00000166455	C16orf46	chromosome 16 open reading frame 46 [Source:HGNC Symbol;Acc:26525]	ENSMMUG00000013087	C16orf46	chromosome 16 open reading frame 46 [Source:HGNC Symbol;Acc:HGNC:26525]	Diploid	Diploid
ENSG00000172889	EGFL7	EGF-like-domain, multiple 7 [Source:HGNC Symbol;Acc:20594]	ENSMMUG00000026981	EGFL7	EGF like domain multiple 7 [Source:HGNC Symbol;Acc:HGNC:20594]	Diploid	Diploid
ENSG00000189060	H1F0	H1 histone family, member 0 [Source:HGNC Symbol;Acc:4714]	ENSMMUG00000048560	H1F0	H1 histone family member 0 [Source:HGNC Symbol;Acc:HGNC:4714]	Diploid	Diploid
ENSG00000047634	SCML1	sex comb on midleg-like 1 (Drosophila) [Source:HGNC Symbol;Acc:10580]	ENSMMUG00000012899	SCML1	Sex comb on midleg-like protein 1 [Source:UniProtKB/Swiss-Prot;Acc:B0FZP2]	Diploid	Diploid
ENSG00000198081	ZBTB14	zinc finger and BTB domain containing 14 [Source:HGNC Symbol;Acc:12860]	ENSMMUG00000022005	ZBTB14	zinc finger and BTB domain containing 14 [Source:HGNC Symbol;Acc:HGNC:12860]	Diploid	Diploid
ENSG00000206561	COLQ	collagen-like tail subunit (single strand of homotrimer) of asymmetric acetylcholinesterase [Source:HGNC Symbol;Acc:2226]	ENSMMUG00000031486	COLQ	collagen like tail subunit of asymmetric acetylcholinesterase [Source:HGNC Symbol;Acc:HGNC:2226]	Diploid	Diploid
ENSG00000119973	PRLHR	prolactin releasing hormone receptor [Source:HGNC Symbol;Acc:4464]	ENSMMUG00000039137	PRLHR	prolactin releasing hormone receptor [Source:HGNC Symbol;Acc:HGNC:4464]	Diploid	Diploid
ENSG00000133243	BTBD2	BTB (POZ) domain containing 2 [Source:HGNC Symbol;Acc:15504]	ENSMMUG00000006618	BTBD2	BTB domain containing 2 [Source:HGNC Symbol;Acc:HGNC:15504]	Diploid	Diploid
ENSG00000204574	ABCF1	ATP-binding cassette, sub-family F (GCN20), member 1 [Source:HGNC Symbol;Acc:70]	ENSMMUG00000001886	ABCF1	ATP-binding cassette sub-family F member 1 [Source:RefSeq peptide;Acc:NP_001098632]	Diploid	Diploid
ENSG00000178927	C17orf62	chromosome 17 open reading frame 62 [Source:HGNC Symbol;Acc:28672]	ENSMMUG00000019222	C16H17orf62	chromosome 17 open reading frame 62 [Source:RefSeq peptide;Acc:NP_001181743]	Diploid	Diploid
ENSG00000162040	HS3ST6	heparan sulfate (glucosamine) 3-O-sulfotransferase 6 [Source:HGNC Symbol;Acc:14178]	ENSMMUG00000048601	HS3ST6	heparan sulfate-glucosamine 3-sulfotransferase 6 [Source:HGNC Symbol;Acc:HGNC:14178]	Diploid	Diploid
ENSG00000112096	SOD2	superoxide dismutase 2, mitochondrial [Source:HGNC Symbol;Acc:11180]	ENSMMUG00000038719	SOD2	superoxide dismutase 2, mitochondrial [Source:HGNC Symbol;Acc:HGNC:11180]	Diploid	Diploid
ENSG00000152377	SPOCK1	sparc/osteonectin, cwcv and kazal-like domains proteoglycan (testican) 1 [Source:HGNC Symbol;Acc:11251]	ENSMMUG00000001344	SPOCK1	SPARC/osteonectin, cwcv and kazal like domains proteoglycan 1 [Source:HGNC Symbol;Acc:HGNC:11251]	Diploid	Diploid
ENSG00000166451	CENPN	centromere protein N [Source:HGNC Symbol;Acc:30873]	ENSMMUG00000013082	CENPN	centromere protein N [Source:HGNC Symbol;Acc:HGNC:30873]	Diploid	Diploid
ENSG00000081059	TCF7	transcription factor 7 (T-cell specific, HMG-box) [Source:HGNC Symbol;Acc:11639]	ENSMMUG00000022788	TCF7	transcription factor 7 [Source:HGNC Symbol;Acc:HGNC:11639]	Diploid	Diploid
ENSG00000160131	VMA21	VMA21 vacuolar H+-ATPase homolog (S. cerevisiae) [Source:HGNC Symbol;Acc:22082]	ENSMMUG00000039801	VMA21	VMA21, vacuolar ATPase assembly factor [Source:HGNC Symbol;Acc:HGNC:22082]	Diploid	Diploid
	ENSMMUG00000045877	MPC1L	mitochondrial pyruvate carrier 1 like [Source:HGNC Symbol;Acc:HGNC:44205]	Diploid	Diploid
ENSG00000153944	MSI2	musashi RNA-binding protein 2 [Source:HGNC Symbol;Acc:18585]	ENSMMUG00000002069	MSI2	musashi RNA binding protein 2 [Source:HGNC Symbol;Acc:HGNC:18585]	Diploid	Diploid
ENSG00000177225	PDDC1	Parkinson disease 7 domain containing 1 [Source:HGNC Symbol;Acc:26616]	ENSMMUG00000007511	GATD1	glutamine amidotransferase like class 1 domain containing 1 [Source:HGNC Symbol;Acc:HGNC:26616]	Diploid	Diploid
ENSG00000170925	TEX13B	testis expressed 13B [Source:HGNC Symbol;Acc:11736]	ENSMMUG00000007185	TEX13B	testis expressed 13B [Source:HGNC Symbol;Acc:HGNC:11736]	Diploid	Diploid
ENSG00000182732	RGS6	regulator of G-protein signaling 6 [Source:HGNC Symbol;Acc:10002]	ENSMMUG00000001820	RGS6	regulator of G-protein signaling 6 [Source:RefSeq peptide;Acc:NP_001252650]	Diploid	Diploid
ENSG00000134443	GRP	gastrin-releasing peptide [Source:HGNC Symbol;Acc:4605]	ENSMMUG00000007584	GRP	gastrin releasing peptide [Source:HGNC Symbol;Acc:HGNC:4605]	Diploid	Diploid
ENSG00000113525	IL5	interleukin 5 (colony-stimulating factor, eosinophil) [Source:HGNC Symbol;Acc:6016]	ENSMMUG00000048509	IL5	interleukin 5 [Source:HGNC Symbol;Acc:HGNC:6016]	Diploid	Diploid
ENSG00000173163	COMMD1	copper metabolism (Murr1) domain containing 1 [Source:HGNC Symbol;Acc:23024]	ENSMMUG00000030824	COMMD1	copper metabolism domain containing 1 [Source:HGNC Symbol;Acc:HGNC:23024]	Diploid	Diploid
ENSG00000185753	CXorf38	chromosome X open reading frame 38 [Source:HGNC Symbol;Acc:28589]	ENSMMUG00000005263	CXorf38	chromosome X open reading frame 38 [Source:HGNC Symbol;Acc:HGNC:28589]	Diploid	Diploid
ENSG00000168685	IL7R	interleukin 7 receptor [Source:HGNC Symbol;Acc:6024]	ENSMMUG00000001676	IL7R	interleukin 7 receptor [Source:HGNC Symbol;Acc:HGNC:6024]	Diploid	Diploid
ENSG00000147454	SLC25A37	solute carrier family 25 (mitochondrial iron transporter), member 37 [Source:HGNC Symbol;Acc:29786]	ENSMMUG00000043748	SLC25A37	solute carrier family 25 member 37 [Source:HGNC Symbol;Acc:HGNC:29786]	Diploid	Diploid
ENSG00000140937	CDH11	cadherin 11, type 2, OB-cadherin (osteoblast) [Source:HGNC Symbol;Acc:1750]	ENSMMUG00000005520	CDH11	cadherin 11 [Source:HGNC Symbol;Acc:HGNC:1750]	Diploid	Diploid
ENSG00000149357	LAMTOR1	late endosomal/lysosomal adaptor, MAPK and MTOR activator 1 [Source:HGNC Symbol;Acc:26068]	ENSMMUG00000021282	LAMTOR1	late endosomal/lysosomal adaptor, MAPK and MTOR activator 1 [Source:HGNC Symbol;Acc:HGNC:26068]	Diploid	Diploid
ENSG00000125347	IRF1	interferon regulatory factor 1 [Source:HGNC Symbol;Acc:6116]	ENSMMUG00000008100	IRF1	interferon regulatory factor 1 [Source:HGNC Symbol;Acc:HGNC:6116]	Diploid	Diploid
ENSG00000137218	FRS3	fibroblast growth factor receptor substrate 3 [Source:HGNC Symbol;Acc:16970]	ENSMMUG00000012417	FRS3	fibroblast growth factor receptor substrate 3 [Source:HGNC Symbol;Acc:HGNC:16970]	Diploid	Diploid
ENSG00000184574	LPAR5	lysophosphatidic acid receptor 5 [Source:HGNC Symbol;Acc:13307]	ENSMMUG00000017619	LPAR5	lysophosphatidic acid receptor 5 [Source:HGNC Symbol;Acc:HGNC:13307]	Diploid	Diploid
ENSG00000124713	GNMT	glycine N-methyltransferase [Source:HGNC Symbol;Acc:4415]	ENSMMUG00000001393	GNMT	glycine N-methyltransferase [Source:HGNC Symbol;Acc:HGNC:4415]	Diploid	Diploid
ENSG00000111644	ACRBP	acrosin binding protein [Source:HGNC Symbol;Acc:17195]	ENSMMUG00000016983	ACRBP	acrosin binding protein [Source:HGNC Symbol;Acc:HGNC:17195]	Diploid	Diploid
ENSG00000107164	FUBP3	far upstream element (FUSE) binding protein 3 [Source:HGNC Symbol;Acc:4005]	ENSMMUG00000008249	FUBP3	far upstream element binding protein 3 [Source:HGNC Symbol;Acc:HGNC:4005]	Diploid	Diploid
ENSG00000124587	PEX6	peroxisomal biogenesis factor 6 [Source:HGNC Symbol;Acc:8859]	ENSMMUG00000001394	PEX6	peroxisomal biogenesis factor 6 [Source:HGNC Symbol;Acc:HGNC:8859]	Diploid	Diploid
ENSG00000151692	RNF144A	ring finger protein 144A [Source:HGNC Symbol;Acc:20457]	ENSMMUG00000045908	RNF144A	ring finger protein 144A [Source:HGNC Symbol;Acc:HGNC:20457]	Diploid	Diploid
ENSG00000106031	HOXA13	homeobox A13 [Source:HGNC Symbol;Acc:5102]	ENSMMUG00000013463	HOXA13	homeobox A13 [Source:HGNC Symbol;Acc:HGNC:5102]	Diploid	Diploid
ENSG00000140986	RPL3L	ribosomal protein L3-like [Source:HGNC Symbol;Acc:10351]	ENSMMUG00000007937	RPL3L	ribosomal protein L3 like [Source:HGNC Symbol;Acc:HGNC:10351]	Diploid	Diploid
ENSG00000167106	FAM102A	family with sequence similarity 102, member A [Source:HGNC Symbol;Acc:31419]	ENSMMUG00000014375	FAM102A	family with sequence similarity 102 member A [Source:HGNC Symbol;Acc:HGNC:31419]	Diploid	Diploid
ENSG00000135374	ELF5	E74-like factor 5 (ets domain transcription factor) [Source:HGNC Symbol;Acc:3320]	ENSMMUG00000002432	ELF5	E74 like ETS transcription factor 5 [Source:HGNC Symbol;Acc:HGNC:3320]	Diploid	Diploid
ENSG00000078902	TOLLIP	toll interacting protein [Source:HGNC Symbol;Acc:16476]	ENSMMUG00000003104	TOLLIP	toll interacting protein [Source:HGNC Symbol;Acc:HGNC:16476]	Diploid	Diploid
ENSG00000115977	AAK1	AP2 associated kinase 1 [Source:HGNC Symbol;Acc:19679]	ENSMMUG00000007868	AAK1	AP2 associated kinase 1 [Source:HGNC Symbol;Acc:HGNC:19679]	Diploid	Diploid
ENSG00000123570	RAB9B	RAB9B, member RAS oncogene family [Source:HGNC Symbol;Acc:14090]	ENSMMUG00000021198	RAB9B	RAB9B, member RAS oncogene family [Source:HGNC Symbol;Acc:HGNC:14090]	Diploid	Diploid
ENSG00000119714	GPR68	G protein-coupled receptor 68 [Source:HGNC Symbol;Acc:4519]	ENSMMUG00000022390	GPR68	G protein-coupled receptor 68 [Source:HGNC Symbol;Acc:HGNC:4519]	Diploid	Diploid
ENSG00000101842	VSIG1	V-set and immunoglobulin domain containing 1 [Source:HGNC Symbol;Acc:28675]	ENSMMUG00000007189	VSIG1	V-set and immunoglobulin domain containing 1 [Source:HGNC Symbol;Acc:HGNC:28675]	Diploid	Diploid
ENSG00000015592	STMN4	stathmin-like 4 [Source:HGNC Symbol;Acc:16078]	ENSMMUG00000018670	STMN4	stathmin 4 [Source:HGNC Symbol;Acc:HGNC:16078]	Diploid	Diploid
ENSG00000136908	DPM2	dolichyl-phosphate mannosyltransferase polypeptide 2, regulatory subunit [Source:HGNC Symbol;Acc:3006]	ENSMMUG00000014374	DPM2	dolichyl-phosphate mannosyltransferase subunit 2, regulatory [Source:HGNC Symbol;Acc:HGNC:3006]	Diploid	Diploid
ENSG00000100116	GCAT	glycine C-acetyltransferase [Source:HGNC Symbol;Acc:4188]	ENSMMUG00000015258	GCAT	glycine C-acetyltransferase [Source:HGNC Symbol;Acc:HGNC:4188]	Diploid	Diploid
ENSG00000168621	GDNF	glial cell derived neurotrophic factor [Source:HGNC Symbol;Acc:4232]	ENSMMUG00000018963	GDNF	glial cell derived neurotrophic factor [Source:HGNC Symbol;Acc:HGNC:4232]	Diploid	Diploid
ENSG00000169194	IL13	interleukin 13 [Source:HGNC Symbol;Acc:5973]	ENSMMUG00000003131	IL13	interleukin 13 [Source:HGNC Symbol;Acc:HGNC:5973]	Diploid	Diploid
ENSG00000048052	HDAC9	histone deacetylase 9 [Source:HGNC Symbol;Acc:14065]	ENSMMUG00000011170	HDAC9	histone deacetylase 9 [Source:HGNC Symbol;Acc:HGNC:14065]	Diploid	Diploid
ENSG00000173848	NET1	neuroepithelial cell transforming 1 [Source:HGNC Symbol;Acc:14592]	ENSMMUG00000017443	NET1	neuroepithelial cell transforming 1 [Source:HGNC Symbol;Acc:HGNC:14592]	Diploid	Diploid
ENSG00000134954	ETS1	v-ets avian erythroblastosis virus E26 oncogene homolog 1 [Source:HGNC Symbol;Acc:3488]	ENSMMUG00000020706	ETS1	ETS proto-oncogene 1, transcription factor [Source:HGNC Symbol;Acc:HGNC:3488]	Diploid	Diploid
ENSG00000174136	RGMB	repulsive guidance molecule family member b [Source:HGNC Symbol;Acc:26896]	ENSMMUG00000014086	RGMB	RGM domain family member B [Source:RefSeq peptide;Acc:NP_001252549]	Diploid	Diploid
ENSG00000198173	FAM47C	family with sequence similarity 47, member C [Source:HGNC Symbol;Acc:25301]	ENSMMUG00000011104	FAM47C	family with sequence similarity 47 member C [Source:HGNC Symbol;Acc:HGNC:25301]	Diploid	Diploid
ENSG00000109083	IFT20	intraflagellar transport 20 homolog (Chlamydomonas) [Source:HGNC Symbol;Acc:30989]	ENSMMUG00000019143			Diploid	Diploid
ENSG00000187091	PLCD1	phospholipase C, delta 1 [Source:HGNC Symbol;Acc:9060]	ENSMMUG00000000985	PLCD1	phospholipase C delta 1 [Source:HGNC Symbol;Acc:HGNC:9060]	Diploid	Diploid
ENSG00000166963	MAP1A	microtubule-associated protein 1A [Source:HGNC Symbol;Acc:6835]	ENSMMUG00000007255	MAP1A	microtubule associated protein 1A [Source:HGNC Symbol;Acc:HGNC:6835]	Diploid	Diploid
ENSG00000124564	SLC17A3	solute carrier family 17 (organic anion transporter), member 3 [Source:HGNC Symbol;Acc:10931]	ENSMMUG00000002583	SLC17A3	solute carrier family 17 member 3 [Source:HGNC Symbol;Acc:HGNC:10931]	Diploid	Diploid
ENSG00000146263	MMS22L	MMS22-like, DNA repair protein [Source:HGNC Symbol;Acc:21475]	ENSMMUG00000040203	MMS22L	MMS22 like, DNA repair protein [Source:HGNC Symbol;Acc:HGNC:21475]	Diploid	Diploid
ENSG00000110514	MADD	MAP-kinase activating death domain [Source:HGNC Symbol;Acc:6766]	ENSMMUG00000015602	MADD	MAP kinase activating death domain [Source:HGNC Symbol;Acc:HGNC:6766]	Diploid	Diploid
ENSG00000132031	MATN3	matrilin 3 [Source:HGNC Symbol;Acc:6909]	ENSMMUG00000001579	MATN3	matrilin 3 [Source:HGNC Symbol;Acc:HGNC:6909]	Diploid	Diploid
ENSG00000155099	TMEM55A	transmembrane protein 55A [Source:HGNC Symbol;Acc:25452]	ENSMMUG00000042263	TMEM55A	transmembrane protein 55A [Source:HGNC Symbol;Acc:HGNC:25452]	Diploid	Diploid
ENSG00000047621	C12orf4	chromosome 12 open reading frame 4 [Source:HGNC Symbol;Acc:1184]	ENSMMUG00000015188	C12orf4	chromosome 12 open reading frame 4 [Source:HGNC Symbol;Acc:HGNC:1184]	Diploid	Diploid
ENSG00000215041	NEURL4	neuralized E3 ubiquitin protein ligase 4 [Source:HGNC Symbol;Acc:34410]	ENSMMUG00000006207	NEURL4	neuralized E3 ubiquitin protein ligase 4 [Source:HGNC Symbol;Acc:HGNC:34410]	Diploid	Diploid
ENSG00000130717	UCK1	uridine-cytidine kinase 1 [Source:HGNC Symbol;Acc:14859]	ENSMMUG00000009976	UCK1	uridine-cytidine kinase 1 [Source:HGNC Symbol;Acc:HGNC:14859]	Diploid	Diploid
ENSG00000153707	PTPRD	protein tyrosine phosphatase, receptor type, D [Source:HGNC Symbol;Acc:9668]	ENSMMUG00000006952	PTPRD	protein tyrosine phosphatase, receptor type D [Source:HGNC Symbol;Acc:HGNC:9668]	Diploid	Diploid
ENSG00000023892	DEF6	differentially expressed in FDCP 6 homolog (mouse) [Source:HGNC Symbol;Acc:2760]	ENSMMUG00000023560	DEF6	DEF6, guanine nucleotide exchange factor [Source:HGNC Symbol;Acc:HGNC:2760]	Diploid	Diploid
ENSG00000120709	FAM53C	family with sequence similarity 53, member C [Source:HGNC Symbol;Acc:1336]	ENSMMUG00000005396	FAM53C	family with sequence similarity 53 member C [Source:HGNC Symbol;Acc:HGNC:1336]	Diploid	Diploid
ENSG00000166049	PASD1	PAS domain containing 1 [Source:HGNC Symbol;Acc:20686]	ENSMMUG00000022771	PASD1	PAS domain containing repressor 1 [Source:HGNC Symbol;Acc:HGNC:20686]	Diploid	Diploid
ENSG00000109084	TMEM97	transmembrane protein 97 [Source:HGNC Symbol;Acc:28106]	ENSMMUG00000019142	TMEM97	transmembrane protein 97 [Source:HGNC Symbol;Acc:HGNC:28106]	Diploid	Diploid
ENSG00000104381	GDAP1	ganglioside induced differentiation associated protein 1 [Source:HGNC Symbol;Acc:15968]	ENSMMUG00000022326	GDAP1	ganglioside induced differentiation associated protein 1 [Source:HGNC Symbol;Acc:HGNC:15968]	Diploid	Diploid
ENSG00000150756	FAM173B	family with sequence similarity 173, member B [Source:HGNC Symbol;Acc:27029]	ENSMMUG00000020111	FAM173B	family with sequence similarity 173 member B [Source:HGNC Symbol;Acc:HGNC:27029]	Diploid	Diploid
ENSG00000112033	PPARD	peroxisome proliferator-activated receptor delta [Source:HGNC Symbol;Acc:9235]	ENSMMUG00000015904	PPARD	peroxisome proliferator activated receptor delta [Source:HGNC Symbol;Acc:HGNC:9235]	Diploid	Diploid
ENSG00000146021	KLHL3	kelch-like family member 3 [Source:HGNC Symbol;Acc:6354]	ENSMMUG00000011925	KLHL3	kelch like family member 3 [Source:HGNC Symbol;Acc:HGNC:6354]	Diploid	Diploid
ENSG00000130714	POMT1	protein-O-mannosyltransferase 1 [Source:HGNC Symbol;Acc:9202]	ENSMMUG00000009975	POMT1	protein O-mannosyltransferase 1 [Source:HGNC Symbol;Acc:HGNC:9202]	Diploid	Diploid
ENSG00000168876	ANKRD49	ankyrin repeat domain 49 [Source:HGNC Symbol;Acc:25970]	ENSMMUG00000037865	ANKRD49	ankyrin repeat domain 49 [Source:HGNC Symbol;Acc:HGNC:25970]	Diploid	Diploid
ENSG00000162992	NEUROD1	neuronal differentiation 1 [Source:HGNC Symbol;Acc:7762]	ENSMMUG00000008296	NEUROD1	neuronal differentiation 1 [Source:HGNC Symbol;Acc:HGNC:7762]	Diploid	Diploid
ENSG00000174137	FAM53A	family with sequence similarity 53, member A [Source:HGNC Symbol;Acc:31860]	ENSMMUG00000008363	FAM53A	family with sequence similarity 53 member A [Source:HGNC Symbol;Acc:HGNC:31860]	Diploid	Diploid
ENSG00000108861	DUSP3	dual specificity phosphatase 3 [Source:HGNC Symbol;Acc:3069]	ENSMMUG00000002351	DUSP3	dual specificity phosphatase 3 [Source:HGNC Symbol;Acc:HGNC:3069]	Diploid	Diploid
ENSG00000180182	MED14	mediator complex subunit 14 [Source:HGNC Symbol;Acc:2370]	ENSMMUG00000005264	MED14	mediator complex subunit 14 [Source:HGNC Symbol;Acc:HGNC:2370]	Diploid	Diploid
ENSG00000154134	ROBO3	roundabout, axon guidance receptor, homolog 3 (Drosophila) [Source:HGNC Symbol;Acc:13433]	ENSMMUG00000021576	ROBO3	roundabout guidance receptor 3 [Source:HGNC Symbol;Acc:HGNC:13433]	Diploid	Diploid
ENSG00000179044	EXOC3L1	exocyst complex component 3-like 1 [Source:HGNC Symbol;Acc:27540]	ENSMMUG00000020254	EXOC3L1	exocyst complex component 3 like 1 [Source:HGNC Symbol;Acc:HGNC:27540]	Diploid	Diploid
ENSG00000037474	NSUN2	NOP2/Sun RNA methyltransferase family, member 2 [Source:HGNC Symbol;Acc:25994]	ENSMMUG00000002561	NSUN2	NOP2/Sun RNA methyltransferase family member 2 [Source:HGNC Symbol;Acc:HGNC:25994]	Diploid	Diploid
ENSG00000074181	NOTCH3	notch 3 [Source:HGNC Symbol;Acc:7883]	ENSMMUG00000013637	NOTCH3	notch 3 [Source:HGNC Symbol;Acc:HGNC:7883]	Diploid	Diploid
ENSG00000250510	GPR162	G protein-coupled receptor 162 [Source:HGNC Symbol;Acc:16693]	ENSMMUG00000049147	GPR162	G protein-coupled receptor 162 [Source:HGNC Symbol;Acc:HGNC:16693]	Diploid	Diploid
ENSG00000137713	PPP2R1B	protein phosphatase 2, regulatory subunit A, beta [Source:HGNC Symbol;Acc:9303]	ENSMMUG00000014001	PPP2R1B	protein phosphatase 2 scaffold subunit Abeta [Source:HGNC Symbol;Acc:HGNC:9303]	Diploid	Diploid
ENSG00000051128	HOMER3	homer homolog 3 (Drosophila) [Source:HGNC Symbol;Acc:17514]	ENSMMUG00000023294	HOMER3	homer protein homolog 3 [Source:RefSeq peptide;Acc:NP_001244618]	Diploid	Diploid
ENSG00000103490	PYCARD	PYD and CARD domain containing [Source:HGNC Symbol;Acc:16608]	ENSMMUG00000021704	PYCARD	apoptosis-associated speck-like protein containing a CARD [Source:RefSeq peptide;Acc:NP_001181501]	Diploid	Diploid
ENSG00000105705	SUGP1	SURP and G patch domain containing 1 [Source:HGNC Symbol;Acc:18643]	ENSMMUG00000028834	SUGP1	SURP and G patch domain containing 1 [Source:RefSeq peptide;Acc:NP_001248673]	Diploid	Diploid
ENSG00000183775	KCTD16	potassium channel tetramerization domain containing 16 [Source:HGNC Symbol;Acc:29244]	ENSMMUG00000029791	KCTD16	potassium channel tetramerization domain containing 16 [Source:HGNC Symbol;Acc:HGNC:29244]	Diploid	Diploid
ENSG00000177663	IL17RA	interleukin 17 receptor A [Source:HGNC Symbol;Acc:5985]	ENSMMUG00000022222	IL17RA	interleukin 17 receptor A [Source:HGNC Symbol;Acc:HGNC:5985]	Diploid	Diploid
ENSG00000134569	LRP4	low density lipoprotein receptor-related protein 4 [Source:HGNC Symbol;Acc:6696]	ENSMMUG00000013100	LRP4	LDL receptor related protein 4 [Source:HGNC Symbol;Acc:HGNC:6696]	Diploid	Diploid
ENSG00000182645	CCDC172	coiled-coil domain containing 172 [Source:HGNC Symbol;Acc:30524]	ENSMMUG00000016663	CCDC172	coiled-coil domain containing 172 [Source:HGNC Symbol;Acc:HGNC:30524]	Diploid	Diploid
ENSG00000167654	ATCAY	ataxia, cerebellar, Cayman type [Source:HGNC Symbol;Acc:779]	ENSMMUG00000039195	ATCAY	ATCAY, caytaxin [Source:HGNC Symbol;Acc:HGNC:779]	Diploid	Diploid
ENSG00000169900	PYDC1	PYD (pyrin domain) containing 1 [Source:HGNC Symbol;Acc:30261]	ENSMMUG00000016275	PYDC1	pyrin domain containing 1 [Source:HGNC Symbol;Acc:HGNC:30261]	Diploid	Diploid
ENSG00000102158	MAGT1	magnesium transporter 1 [Source:HGNC Symbol;Acc:28880]	ENSMMUG00000014407	MAGT1	magnesium transporter 1 [Source:HGNC Symbol;Acc:HGNC:28880]	Diploid	Diploid
ENSG00000087258	GNAO1	guanine nucleotide binding protein (G protein), alpha activating activity polypeptide O [Source:HGNC Symbol;Acc:4389]	ENSMMUG00000019900	GNAO1	G protein subunit alpha o1 [Source:HGNC Symbol;Acc:HGNC:4389]	Diploid	Diploid
ENSG00000105669	COPE	coatomer protein complex, subunit epsilon [Source:HGNC Symbol;Acc:2234]	ENSMMUG00000023291	COPE	coatomer protein complex subunit epsilon [Source:HGNC Symbol;Acc:HGNC:2234]	Diploid	Diploid
ENSG00000102543	CDADC1	cytidine and dCMP deaminase domain containing 1 [Source:HGNC Symbol;Acc:20299]	ENSMMUG00000013470	CDADC1	cytidine and dCMP deaminase domain containing 1 [Source:HGNC Symbol;Acc:HGNC:20299]	Diploid	Diploid
ENSG00000169692	AGPAT2	1-acylglycerol-3-phosphate O-acyltransferase 2 [Source:HGNC Symbol;Acc:325]	ENSMMUG00000020990	AGPAT2	1-acylglycerol-3-phosphate O-acyltransferase 2 [Source:HGNC Symbol;Acc:HGNC:325]	Diploid	Diploid
ENSG00000134548	C12orf39	chromosome 12 open reading frame 39 [Source:HGNC Symbol;Acc:28139]	ENSMMUG00000042352	SPX	spexin hormone [Source:HGNC Symbol;Acc:HGNC:28139]	Diploid	Diploid
ENSG00000015133	CCDC88C	coiled-coil domain containing 88C [Source:HGNC Symbol;Acc:19967]	ENSMMUG00000020687	CCDC88C	coiled-coil domain containing 88C [Source:HGNC Symbol;Acc:HGNC:19967]	Diploid	Diploid
ENSG00000182087	TMEM259	transmembrane protein 259 [Source:HGNC Symbol;Acc:17039]	ENSMMUG00000013577	TMEM259	transmembrane protein 259 [Source:HGNC Symbol;Acc:HGNC:17039]	Diploid	Diploid
ENSG00000111713	GYS2	glycogen synthase 2 (liver) [Source:HGNC Symbol;Acc:4707]	ENSMMUG00000016171	GYS2	glycogen synthase 2 [Source:HGNC Symbol;Acc:HGNC:4707]	Diploid	Diploid
ENSG00000016082	ISL1	ISL LIM homeobox 1 [Source:HGNC Symbol;Acc:6132]	ENSMMUG00000003984	ISL1	ISL LIM homeobox 1 [Source:HGNC Symbol;Acc:HGNC:6132]	Diploid	Diploid
ENSG00000206075	SERPINB5	serpin peptidase inhibitor, clade B (ovalbumin), member 5 [Source:HGNC Symbol;Acc:8949]	ENSMMUG00000014182	SERPINB5	serpin family B member 5 [Source:HGNC Symbol;Acc:HGNC:8949]	Diploid	Diploid
ENSG00000185760	KCNQ5	potassium voltage-gated channel, KQT-like subfamily, member 5 [Source:HGNC Symbol;Acc:6299]	ENSMMUG00000015320	KCNQ5	potassium voltage-gated channel subfamily Q member 5 [Source:HGNC Symbol;Acc:HGNC:6299]	Diploid	Diploid
ENSG00000169717	ACTRT2	actin-related protein T2 [Source:HGNC Symbol;Acc:24026]	ENSMMUG00000012334	ACTRT2	actin related protein T2 [Source:HGNC Symbol;Acc:HGNC:24026]	Diploid	Diploid
ENSG00000173705	SUSD5	sushi domain containing 5 [Source:HGNC Symbol;Acc:29061]	ENSMMUG00000007627	SUSD5	sushi domain containing 5 [Source:HGNC Symbol;Acc:HGNC:29061]	Diploid	Diploid
ENSG00000100490	CDKL1	cyclin-dependent kinase-like 1 (CDC2-related kinase) [Source:HGNC Symbol;Acc:1781]	ENSMMUG00000002616	CDKL1	cyclin dependent kinase like 1 [Source:HGNC Symbol;Acc:HGNC:1781]	Diploid	Diploid
ENSG00000172602	RND1	Rho family GTPase 1 [Source:HGNC Symbol;Acc:18314]	ENSMMUG00000048864	RND1	Rho family GTPase 1 [Source:HGNC Symbol;Acc:HGNC:18314]	Diploid	Diploid
ENSG00000147065	MSN	moesin [Source:HGNC Symbol;Acc:7373]	ENSMMUG00000015653	MSN	moesin [Source:HGNC Symbol;Acc:HGNC:7373]	Diploid	Diploid
ENSG00000088386	SLC15A1	solute carrier family 15 (oligopeptide transporter), member 1 [Source:HGNC Symbol;Acc:10920]	ENSMMUG00000001402	SLC15A1	solute carrier family 15 member 1 [Source:RefSeq peptide;Acc:NP_001028071]	Diploid	Diploid
ENSG00000134330	IAH1	isoamyl acetate-hydrolyzing esterase 1 homolog (S. cerevisiae) [Source:HGNC Symbol;Acc:27696]	ENSMMUG00000018045	IAH1	isoamyl acetate hydrolyzing esterase 1 (putative) [Source:HGNC Symbol;Acc:HGNC:27696]	Diploid	Diploid
ENSG00000172367	PDZD3	PDZ domain containing 3 [Source:HGNC Symbol;Acc:19891]	ENSMMUG00000012190	PDZD3	PDZ domain containing 3 [Source:HGNC Symbol;Acc:HGNC:19891]	Diploid	Diploid
ENSG00000135373	EHF	ets homologous factor [Source:HGNC Symbol;Acc:3246]	ENSMMUG00000005927	EHF	ETS homologous factor [Source:HGNC Symbol;Acc:HGNC:3246]	Diploid	Diploid
ENSG00000116032	GRIN3B	glutamate receptor, ionotropic, N-methyl-D-aspartate 3B [Source:HGNC Symbol;Acc:16768]	ENSMMUG00000048135	GRIN3B	glutamate ionotropic receptor NMDA type subunit 3B [Source:HGNC Symbol;Acc:HGNC:16768]	Diploid	Diploid
ENSG00000177370	TIMM22	translocase of inner mitochondrial membrane 22 homolog (yeast) [Source:HGNC Symbol;Acc:17317]	ENSMMUG00000008129	TIMM22	translocase of inner mitochondrial membrane 22 homolog (yeast) [Source:HGNC Symbol;Acc:HGNC:17317]	Diploid	Diploid
ENSG00000167771	RCOR2	REST corepressor 2 [Source:HGNC Symbol;Acc:27455]	ENSMMUG00000014133	RCOR2	REST corepressor 2 [Source:HGNC Symbol;Acc:HGNC:27455]	Diploid	Diploid
ENSG00000177842	ZNF620	zinc finger protein 620 [Source:HGNC Symbol;Acc:28742]	ENSMMUG00000015955	ZNF620	zinc finger protein 620 [Source:HGNC Symbol;Acc:HGNC:28742]	Diploid	Diploid
ENSG00000162975	KCNF1	potassium voltage-gated channel, subfamily F, member 1 [Source:HGNC Symbol;Acc:6246]	ENSMMUG00000002825	KCNF1	potassium voltage-gated channel subfamily F member 1 [Source:RefSeq peptide;Acc:NP_001244508]	Diploid	Diploid
ENSG00000175426	PCSK1	proprotein convertase subtilisin/kexin type 1 [Source:HGNC Symbol;Acc:8743]	ENSMMUG00000005134	PCSK1	proprotein convertase subtilisin/kexin type 1 [Source:HGNC Symbol;Acc:HGNC:8743]	Diploid	Diploid
ENSG00000165168	CYBB	cytochrome b-245, beta polypeptide [Source:HGNC Symbol;Acc:2578]	ENSMMUG00000013220	CYBB	cytochrome b-245 beta chain [Source:HGNC Symbol;Acc:HGNC:2578]	Diploid	Diploid
ENSG00000177947	ODF3	outer dense fiber of sperm tails 3 [Source:HGNC Symbol;Acc:19905]	ENSMMUG00000011502	ODF3	outer dense fiber of sperm tails 3 [Source:HGNC Symbol;Acc:HGNC:19905]	Diploid	Diploid
ENSG00000196844	PATE2	prostate and testis expressed 2 [Source:HGNC Symbol;Acc:32249]	ENSMMUG00000038587	PATE2	prostate and testis expressed 2 [Source:HGNC Symbol;Acc:HGNC:32249]	Diploid	Diploid
ENSG00000103174	NAGPA	N-acetylglucosamine-1-phosphodiester alpha-N-acetylglucosaminidase [Source:HGNC Symbol;Acc:17378]	ENSMMUG00000011499	NAGPA	N-acetylglucosamine-1-phosphodiester alpha-N-acetylglucosaminidase [Source:HGNC Symbol;Acc:HGNC:17378]	Diploid	Diploid
ENSG00000111832	RWDD1	RWD domain containing 1 [Source:HGNC Symbol;Acc:20993]	ENSMMUG00000007415	RWDD1	RWD domain containing 1 [Source:HGNC Symbol;Acc:HGNC:20993]	Diploid	Diploid
ENSG00000101812	H2BFM	H2B histone family, member M [Source:HGNC Symbol;Acc:27867]	ENSMMUG00000032379			Diploid	Diploid
ENSG00000152192	POU4F1	POU class 4 homeobox 1 [Source:HGNC Symbol;Acc:9218]	ENSMMUG00000030683	POU4F1	POU class 4 homeobox 1 [Source:HGNC Symbol;Acc:HGNC:9218]	Diploid	CNV as a whole
ENSG00000166634	SERPINB12	serpin peptidase inhibitor, clade B (ovalbumin), member 12 [Source:HGNC Symbol;Acc:14220]	ENSMMUG00000007171	SERPINB12	serpin family B member 12 [Source:HGNC Symbol;Acc:HGNC:14220]	Diploid	Diploid
ENSG00000047597	XK	X-linked Kx blood group (McLeod syndrome) [Source:HGNC Symbol;Acc:12811]	ENSMMUG00000006969	XK	X-linked Kx blood group [Source:HGNC Symbol;Acc:HGNC:12811]	Diploid	Diploid
ENSG00000172575	RASGRP1	RAS guanyl releasing protein 1 (calcium and DAG-regulated) [Source:HGNC Symbol;Acc:9878]	ENSMMUG00000018333	RASGRP1	RAS guanyl releasing protein 1 [Source:HGNC Symbol;Acc:HGNC:9878]	Diploid	Diploid
ENSG00000123095	BHLHE41	basic helix-loop-helix family, member e41 [Source:HGNC Symbol;Acc:16617]	ENSMMUG00000039562			Diploid	Diploid
ENSG00000165629	ATP5C1	ATP synthase, H+ transporting, mitochondrial F1 complex, gamma polypeptide 1 [Source:HGNC Symbol;Acc:833]	ENSMMUG00000009207	ATP5C1	ATP synthase, H+ transporting, mitochondrial F1 complex, gamma polypeptide 1 [Source:HGNC Symbol;Acc:HGNC:833]	Diploid	Diploid
ENSG00000105671	DDX49	DEAD (Asp-Glu-Ala-Asp) box polypeptide 49 [Source:HGNC Symbol;Acc:18684]	ENSMMUG00000023293	DDX49	DEAD-box helicase 49 [Source:HGNC Symbol;Acc:HGNC:18684]	Diploid	Diploid
ENSG00000136160	EDNRB	endothelin receptor type B [Source:HGNC Symbol;Acc:3180]	ENSMMUG00000005131	EDNRB	endothelin receptor type B [Source:HGNC Symbol;Acc:HGNC:3180]	Diploid	Diploid
ENSG00000036473	OTC	ornithine carbamoyltransferase [Source:HGNC Symbol;Acc:8512]	ENSMMUG00000013493	OTC	ornithine carbamoyltransferase [Source:HGNC Symbol;Acc:HGNC:8512]	Diploid	Diploid
ENSG00000164933	SLC25A32	solute carrier family 25 (mitochondrial folate carrier), member 32 [Source:HGNC Symbol;Acc:29683]	ENSMMUG00000019404	SLC25A32	solute carrier family 25 member 32 [Source:HGNC Symbol;Acc:HGNC:29683]	Diploid	Diploid
ENSG00000130032	PRRG3	proline rich Gla (G-carboxyglutamic acid) 3 (transmembrane) [Source:HGNC Symbol;Acc:30798]	ENSMMUG00000016929	PRRG3	proline rich and Gla domain 3 [Source:HGNC Symbol;Acc:HGNC:30798]	Diploid	Diploid
ENSG00000177951	BET1L	Bet1 golgi vesicular membrane trafficking protein-like [Source:HGNC Symbol;Acc:19348]	ENSMMUG00000011505	BET1L	Bet1 golgi vesicular membrane trafficking protein like [Source:HGNC Symbol;Acc:HGNC:19348]	Diploid	Diploid
ENSG00000123096	SSPN	sarcospan [Source:HGNC Symbol;Acc:11322]	ENSMMUG00000018630	SSPN	sarcospan [Source:HGNC Symbol;Acc:HGNC:11322]	Diploid	Diploid
ENSG00000248712	CCDC153	coiled-coil domain containing 153 [Source:HGNC Symbol;Acc:27446]	ENSMMUG00000012191	CCDC153	coiled-coil domain containing 153 [Source:HGNC Symbol;Acc:HGNC:27446]	Diploid	Diploid
ENSG00000108691	CCL2	chemokine (C-C motif) ligand 2 [Source:HGNC Symbol;Acc:10618]	ENSMMUG00000000288	CCL2	C-C motif chemokine ligand 2 [Source:HGNC Symbol;Acc:HGNC:10618]	Diploid	Diploid
ENSG00000197641	SERPINB13	serpin peptidase inhibitor, clade B (ovalbumin), member 13 [Source:HGNC Symbol;Acc:8944]	ENSMMUG00000047095	SERPINB13	serpin family B member 13 [Source:HGNC Symbol;Acc:HGNC:8944]	Diploid	Diploid
ENSG00000151893	CACUL1	CDK2-associated, cullin domain 1 [Source:HGNC Symbol;Acc:23727]	ENSMMUG00000016370	CACUL1	CDK2 associated cullin domain 1 [Source:HGNC Symbol;Acc:HGNC:23727]	Diploid	Diploid
ENSG00000153113	CAST	calpastatin [Source:HGNC Symbol;Acc:1515]	ENSMMUG00000002062	CAST	calpastatin [Source:HGNC Symbol;Acc:HGNC:1515]	Diploid	Diploid
ENSG00000164713	BRI3	brain protein I3 [Source:HGNC Symbol;Acc:1109]	ENSMMUG00000013275	BRI3	brain protein I3 [Source:HGNC Symbol;Acc:HGNC:1109]	Diploid	Diploid
ENSG00000156313	RPGR	retinitis pigmentosa GTPase regulator [Source:HGNC Symbol;Acc:10295]	ENSMMUG00000013491	RPGR	retinitis pigmentosa GTPase regulator [Source:HGNC Symbol;Acc:HGNC:10295]	Diploid	Diploid
ENSG00000188175	HEPACAM2	HEPACAM family member 2 [Source:HGNC Symbol;Acc:27364]	ENSMMUG00000004456	HEPACAM2	HEPACAM family member 2 [Source:HGNC Symbol;Acc:HGNC:27364]	Diploid	Diploid
ENSG00000165272	AQP3	aquaporin 3 (Gill blood group) [Source:HGNC Symbol;Acc:636]	ENSMMUG00000003314	AQP3	aquaporin 3 (Gill blood group) [Source:HGNC Symbol;Acc:HGNC:636]	Diploid	Diploid
ENSG00000004961	HCCS	holocytochrome c synthase [Source:HGNC Symbol;Acc:4837]	ENSMMUG00000013993	HCCS	holocytochrome c synthase [Source:HGNC Symbol;Acc:HGNC:4837]	Diploid	Diploid
ENSG00000114026	OGG1	8-oxoguanine DNA glycosylase [Source:HGNC Symbol;Acc:8125]	ENSMMUG00000006117	OGG1	8-oxoguanine DNA glycosylase [Source:HGNC Symbol;Acc:HGNC:8125]	Diploid	Diploid
ENSG00000004777	ARHGAP33	Rho GTPase activating protein 33 [Source:HGNC Symbol;Acc:23085]	ENSMMUG00000002394	ARHGAP33	Rho GTPase activating protein 33 [Source:HGNC Symbol;Acc:HGNC:23085]	Diploid	Diploid
ENSG00000102760	RGCC	regulator of cell cycle [Source:HGNC Symbol;Acc:20369]	ENSMMUG00000011593	RGCC	response gene to complement 32 protein [Source:RefSeq peptide;Acc:NP_001180851]	Diploid	Diploid
ENSG00000152193	RNF219	ring finger protein 219 [Source:HGNC Symbol;Acc:20308]	ENSMMUG00000011697	RNF219	ring finger protein 219 [Source:HGNC Symbol;Acc:HGNC:20308]	Diploid	Diploid
ENSG00000167311	ART5	ADP-ribosyltransferase 5 [Source:HGNC Symbol;Acc:24049]	ENSMMUG00000003946	ART5	ADP-ribosyltransferase 5 [Source:HGNC Symbol;Acc:HGNC:24049]	Diploid	Diploid
ENSG00000143942	CHAC2	ChaC, cation transport regulator homolog 2 (E. coli) [Source:HGNC Symbol;Acc:32363]	ENSMMUG00000010639	CHAC2	ChaC cation transport regulator homolog 2 [Source:HGNC Symbol;Acc:HGNC:32363]	Diploid	Diploid
ENSG00000103489	XYLT1	xylosyltransferase I [Source:HGNC Symbol;Acc:15516]	ENSMMUG00000017131	XYLT1	xylosyltransferase 1 [Source:HGNC Symbol;Acc:HGNC:15516]	Diploid	Diploid
ENSG00000185272	RBM11	RNA binding motif protein 11 [Source:HGNC Symbol;Acc:9897]	ENSMMUG00000020089	RBM11	RNA binding motif protein 11 [Source:HGNC Symbol;Acc:HGNC:9897]	Diploid	Diploid
ENSG00000165802	NSMF	NMDA receptor synaptonuclear signaling and neuronal migration factor [Source:HGNC Symbol;Acc:29843]	ENSMMUG00000019605	NELF	NMDA receptor synaptonuclear signaling and neuronal migration factor [Source:HGNC Symbol;Acc:HGNC:29843]	Diploid	Diploid
ENSG00000206418	RAB12	RAB12, member RAS oncogene family [Source:HGNC Symbol;Acc:31332]	ENSMMUG00000045294	RAB12	RAB12, member RAS oncogene family [Source:HGNC Symbol;Acc:HGNC:31332]	Diploid	Diploid
ENSG00000122012	SV2C	synaptic vesicle glycoprotein 2C [Source:HGNC Symbol;Acc:30670]	ENSMMUG00000019887	SV2C	synaptic vesicle glycoprotein 2C [Source:HGNC Symbol;Acc:HGNC:30670]	Diploid	Diploid
ENSG00000163235	TGFA	transforming growth factor, alpha [Source:HGNC Symbol;Acc:11765]	ENSMMUG00000010591	TGFA	transforming growth factor alpha [Source:HGNC Symbol;Acc:HGNC:11765]	Diploid	Diploid
ENSG00000134460	IL2RA	interleukin 2 receptor, alpha [Source:HGNC Symbol;Acc:6008]	ENSMMUG00000015151	IL2RA	interleukin-2 receptor subunit alpha precursor [Source:RefSeq peptide;Acc:NP_001028089]	Diploid	Diploid
ENSG00000069998	CECR5	cat eye syndrome chromosome region, candidate 5 [Source:HGNC Symbol;Acc:1843]	ENSMMUG00000031124	HDHD5	haloacid dehalogenase like hydrolase domain containing 5 [Source:HGNC Symbol;Acc:HGNC:1843]	Diploid	Diploid
ENSG00000103710	RASL12	RAS-like, family 12 [Source:HGNC Symbol;Acc:30289]	ENSMMUG00000004029	RASL12	ras-like protein family member 12 [Source:RefSeq peptide;Acc:NP_001252923]	Diploid	Diploid
ENSG00000112039	FANCE	Fanconi anemia, complementation group E [Source:HGNC Symbol;Acc:3586]	ENSMMUG00000015906	FANCE	Fanconi anemia complementation group E [Source:HGNC Symbol;Acc:HGNC:3586]	Diploid	Diploid
ENSG00000185515	BRCC3	BRCA1/BRCA2-containing complex, subunit 3 [Source:HGNC Symbol;Acc:24185]	ENSMMUG00000004737			Diploid	Diploid
ENSG00000105523	FAM83E	family with sequence similarity 83, member E [Source:HGNC Symbol;Acc:25972]	ENSMMUG00000022156	FAM83E	family with sequence similarity 83 member E [Source:HGNC Symbol;Acc:HGNC:25972]	Diploid	Diploid
ENSG00000148057	IDNK	idnK, gluconokinase homolog (E. coli) [Source:HGNC Symbol;Acc:31367]	ENSMMUG00000019765	IDNK	IDNK, gluconokinase [Source:HGNC Symbol;Acc:HGNC:31367]	Diploid	Diploid
ENSG00000106236	NPTX2	neuronal pentraxin II [Source:HGNC Symbol;Acc:7953]	ENSMMUG00000011970	NPTX2	neuronal pentraxin 2 [Source:HGNC Symbol;Acc:HGNC:7953]	Diploid	Diploid
ENSG00000164418	GRIK2	glutamate receptor, ionotropic, kainate 2 [Source:HGNC Symbol;Acc:4580]	ENSMMUG00000009856	GRIK2	glutamate ionotropic receptor kainate type subunit 2 [Source:HGNC Symbol;Acc:HGNC:4580]	Diploid	Diploid
ENSG00000147378	FATE1	fetal and adult testis expressed 1 [Source:HGNC Symbol;Acc:24683]	ENSMMUG00000040974			Diploid	Diploid
ENSG00000185105	MYADML2	myeloid-associated differentiation marker-like 2 [Source:HGNC Symbol;Acc:34548]	ENSMMUG00000012898	MYADML2	myeloid associated differentiation marker like 2 [Source:HGNC Symbol;Acc:HGNC:34548]	Diploid	Diploid
ENSG00000269743	SLC25A53		ENSMMUG00000011519			Diploid	Diploid
ENSG00000161647	MPP3	membrane protein, palmitoylated 3 (MAGUK p55 subfamily member 3) [Source:HGNC Symbol;Acc:7221]	ENSMMUG00000013260	MPP3	membrane palmitoylated protein 3 [Source:HGNC Symbol;Acc:HGNC:7221]	Diploid	Diploid
ENSG00000101180	HRH3	histamine receptor H3 [Source:HGNC Symbol;Acc:5184]	ENSMMUG00000009606	HRH3	histamine receptor H3 [Source:HGNC Symbol;Acc:HGNC:5184]	Diploid	Diploid
ENSG00000165240	ATP7A	ATPase, Cu++ transporting, alpha polypeptide [Source:HGNC Symbol;Acc:869]	ENSMMUG00000012871	ATP7A	ATPase copper transporting alpha [Source:HGNC Symbol;Acc:HGNC:869]	Diploid	Diploid
ENSG00000082397	EPB41L3	erythrocyte membrane protein band 4.1-like 3 [Source:HGNC Symbol;Acc:3380]	ENSMMUG00000019418	EPB41L3	erythrocyte membrane protein band 4.1 like 3 [Source:HGNC Symbol;Acc:HGNC:3380]	Diploid	Diploid
ENSG00000131831	RAI2	retinoic acid induced 2 [Source:HGNC Symbol;Acc:9835]	ENSMMUG00000001433	RAI2	retinoic acid induced 2 [Source:HGNC Symbol;Acc:HGNC:9835]	Diploid	Diploid
ENSG00000119737	GPR75	G protein-coupled receptor 75 [Source:HGNC Symbol;Acc:4526]	ENSMMUG00000008105	GPR75	G protein-coupled receptor 75 [Source:HGNC Symbol;Acc:HGNC:4526]	Diploid	Diploid
ENSG00000144407	PTH2R	parathyroid hormone 2 receptor [Source:HGNC Symbol;Acc:9609]	ENSMMUG00000005295	PTH2R	parathyroid hormone 2 receptor [Source:HGNC Symbol;Acc:HGNC:9609]	Diploid	Diploid
ENSG00000004468	CD38	CD38 molecule [Source:HGNC Symbol;Acc:1667]	ENSMMUG00000015298	CD38	CD38 molecule [Source:HGNC Symbol;Acc:HGNC:1667]	Diploid	Diploid
ENSG00000130055	GDPD2	glycerophosphodiester phosphodiesterase domain containing 2 [Source:HGNC Symbol;Acc:25974]	ENSMMUG00000013943	GDPD2	glycerophosphodiester phosphodiesterase domain containing 2 [Source:HGNC Symbol;Acc:HGNC:25974]	Diploid	Diploid
ENSG00000214827	MTCP1	mature T-cell proliferation 1 [Source:HGNC Symbol;Acc:7423]	ENSMMUG00000010251	MTCP1	mature T-cell proliferation 1 [Source:HGNC Symbol;Acc:HGNC:7423]	Diploid	Diploid
ENSG00000103549	RNF40	ring finger protein 40, E3 ubiquitin protein ligase [Source:HGNC Symbol;Acc:16867]	ENSMMUG00000020881	RNF40	ring finger protein 40 [Source:HGNC Symbol;Acc:HGNC:16867]	Diploid	Diploid
ENSG00000112659	CUL9	cullin 9 [Source:HGNC Symbol;Acc:15982]	ENSMMUG00000005434	CUL9	cullin 9 [Source:HGNC Symbol;Acc:HGNC:15982]	Diploid	Diploid
ENSG00000145936	KCNMB1	potassium large conductance calcium-activated channel, subfamily M, beta member 1 [Source:HGNC Symbol;Acc:6285]	ENSMMUG00000022581	KCNMB1	potassium calcium-activated channel subfamily M regulatory beta subunit 1 [Source:HGNC Symbol;Acc:HGNC:6285]	Diploid	Diploid
ENSG00000121297	TSHZ3	teashirt zinc finger homeobox 3 [Source:HGNC Symbol;Acc:30700]	ENSMMUG00000014028	TSHZ3	teashirt zinc finger homeobox 3 [Source:HGNC Symbol;Acc:HGNC:30700]	Diploid	Diploid
ENSG00000182132	KCNIP1	Kv channel interacting protein 1 [Source:HGNC Symbol;Acc:15521]	ENSMMUG00000009171	KCNIP1	potassium voltage-gated channel interacting protein 1 [Source:HGNC Symbol;Acc:HGNC:15521]	Diploid	Diploid
ENSG00000196396	PTPN1	protein tyrosine phosphatase, non-receptor type 1 [Source:HGNC Symbol;Acc:9642]	ENSMMUG00000007878	PTPN1	protein tyrosine phosphatase, non-receptor type 1 [Source:HGNC Symbol;Acc:HGNC:9642]	Diploid	Diploid
ENSG00000197948	FCHSD1	FCH and double SH3 domains 1 [Source:HGNC Symbol;Acc:25463]	ENSMMUG00000012593	FCHSD1	FCH and double SH3 domains 1 [Source:HGNC Symbol;Acc:HGNC:25463]	Diploid	Diploid
ENSG00000153446	C16orf89	chromosome 16 open reading frame 89 [Source:HGNC Symbol;Acc:28687]	ENSMMUG00000017225	C16orf89	chromosome 16 open reading frame 89 [Source:HGNC Symbol;Acc:HGNC:28687]	Diploid	Diploid
ENSG00000147041	SYTL5	synaptotagmin-like 5 [Source:HGNC Symbol;Acc:15589]	ENSMMUG00000013131	SYTL5	synaptotagmin like 5 [Source:HGNC Symbol;Acc:HGNC:15589]	Diploid	Diploid
ENSG00000111845	PAK1IP1	PAK1 interacting protein 1 [Source:HGNC Symbol;Acc:20882]	ENSMMUG00000018787	PAK1IP1	PAK1 interacting protein 1 [Source:HGNC Symbol;Acc:HGNC:20882]	Diploid	Diploid
ENSG00000005471	ABCB4	ATP-binding cassette, sub-family B (MDR/TAP), member 4 [Source:HGNC Symbol;Acc:45]	ENSMMUG00000010788	ABCB1	multidrug resistance protein 1 [Source:RefSeq peptide;Acc:NP_001028059]	Diploid	Diploid
ENSG00000109205	ODAM	odontogenic, ameloblast asssociated [Source:HGNC Symbol;Acc:26043]	ENSMMUG00000006029	ODAM	Odontogenic ameloblast-associated protein [Source:UniProtKB/Swiss-Prot;Acc:A1YQ92]	Diploid	Diploid
ENSG00000198331	HYLS1	hydrolethalus syndrome 1 [Source:HGNC Symbol;Acc:26558]	ENSMMUG00000048333	HYLS1	HYLS1, centriolar and ciliogenesis associated [Source:HGNC Symbol;Acc:HGNC:26558]	Diploid	Diploid
ENSG00000105131	EPHX3	epoxide hydrolase 3 [Source:HGNC Symbol;Acc:23760]	ENSMMUG00000021384	EPHX3	epoxide hydrolase 3 [Source:HGNC Symbol;Acc:HGNC:23760]	Diploid	Diploid
ENSG00000213339	QTRT1	queuine tRNA-ribosyltransferase 1 [Source:HGNC Symbol;Acc:23797]	ENSMMUG00000028882	QTRT1	queuine tRNA-ribosyltransferase catalytic subunit 1 [Source:HGNC Symbol;Acc:HGNC:23797]	Diploid	Diploid
ENSG00000134996	OSTF1	osteoclast stimulating factor 1 [Source:HGNC Symbol;Acc:8510]	ENSMMUG00000010401	OSTF1	osteoclast stimulating factor 1 [Source:HGNC Symbol;Acc:HGNC:8510]	Diploid	Diploid
ENSG00000130150	MOSPD2	motile sperm domain containing 2 [Source:HGNC Symbol;Acc:28381]	ENSMMUG00000017842	MOSPD2	motile sperm domain containing 2 [Source:HGNC Symbol;Acc:HGNC:28381]	Diploid	Diploid
ENSG00000120049	KCNIP2	Kv channel interacting protein 2 [Source:HGNC Symbol;Acc:15522]	ENSMMUG00000015776	KCNIP2	Kv channel-interacting protein 2 [Source:RefSeq peptide;Acc:NP_001181449]	Diploid	Diploid
ENSG00000110060	PUS3	pseudouridylate synthase 3 [Source:HGNC Symbol;Acc:25461]	ENSMMUG00000041875	PUS3	pseudouridylate synthase 3 [Source:HGNC Symbol;Acc:HGNC:25461]	Diploid	Diploid
ENSG00000170681	MURC	muscle-related coiled-coil protein [Source:HGNC Symbol;Acc:33742]	ENSMMUG00000041129	CAVIN4	caveolae associated protein 4 [Source:HGNC Symbol;Acc:HGNC:33742]	Diploid	Diploid
ENSG00000147036	LANCL3	LanC lantibiotic synthetase component C-like 3 (bacterial) [Source:HGNC Symbol;Acc:24767]	ENSMMUG00000006967	LANCL3	LanC like 3 [Source:HGNC Symbol;Acc:HGNC:24767]	Diploid	Diploid
ENSG00000156463	SH3RF2	SH3 domain containing ring finger 2 [Source:HGNC Symbol;Acc:26299]	ENSMMUG00000018386	SH3RF2	SH3 domain containing ring finger 2 [Source:HGNC Symbol;Acc:HGNC:26299]	Diploid	Diploid
ENSG00000123575	FAM199X	family with sequence similarity 199, X-linked [Source:HGNC Symbol;Acc:25195]	ENSMMUG00000022281	FAM199X	family with sequence similarity 199, X-linked [Source:HGNC Symbol;Acc:HGNC:25195]	Diploid	Diploid
ENSG00000053900	ANAPC4	anaphase promoting complex subunit 4 [Source:HGNC Symbol;Acc:19990]	ENSMMUG00000004458	ANAPC4	anaphase-promoting complex subunit 4 [Source:RefSeq peptide;Acc:NP_001253849]	Diploid	Diploid
ENSG00000228474	OST4	oligosaccharyltransferase 4 homolog (S. cerevisiae) [Source:HGNC Symbol;Acc:32483]	ENSMMUG00000045826	OST4	oligosaccharyltransferase complex subunit 4, non-catalytic [Source:HGNC Symbol;Acc:HGNC:32483]	Diploid	Diploid
ENSG00000105376	ICAM5	intercellular adhesion molecule 5, telencephalin [Source:HGNC Symbol;Acc:5348]	ENSMMUG00000040746	ICAM5	intercellular adhesion molecule 5 [Source:HGNC Symbol;Acc:HGNC:5348]	Diploid	Diploid
ENSG00000164620	RELL2	RELT-like 2 [Source:HGNC Symbol;Acc:26902]	ENSMMUG00000012591	RELL2	RELT like 2 [Source:HGNC Symbol;Acc:HGNC:26902]	Diploid	Diploid
ENSG00000101955	SRPX	sushi-repeat containing protein, X-linked [Source:HGNC Symbol;Acc:11309]	ENSMMUG00000013135	SRPX	sushi repeat containing protein, X-linked [Source:HGNC Symbol;Acc:HGNC:11309]	Diploid	Diploid
ENSG00000234438	KBTBD13	kelch repeat and BTB (POZ) domain containing 13 [Source:HGNC Symbol;Acc:37227]	ENSMMUG00000004028	KBTBD13	kelch repeat and BTB domain containing 13 [Source:HGNC Symbol;Acc:HGNC:37227]	Diploid	Diploid
ENSG00000139182	CLSTN3	calsyntenin 3 [Source:HGNC Symbol;Acc:18371]	ENSMMUG00000008899	CLSTN3	calsyntenin 3 [Source:HGNC Symbol;Acc:HGNC:18371]	Diploid	Diploid
ENSG00000112186	CAP2	CAP, adenylate cyclase-associated protein, 2 (yeast) [Source:HGNC Symbol;Acc:20039]	ENSMMUG00000001990	CAP2	cyclase associated actin cytoskeleton regulatory protein 2 [Source:HGNC Symbol;Acc:HGNC:20039]	Diploid	Diploid
ENSG00000031003	FAM13B	family with sequence similarity 13, member B [Source:HGNC Symbol;Acc:1335]	ENSMMUG00000008009	FAM13B	family with sequence similarity 13 member B [Source:HGNC Symbol;Acc:HGNC:1335]	Diploid	Diploid
ENSG00000171148	TADA3	transcriptional adaptor 3 [Source:HGNC Symbol;Acc:19422]	ENSMMUG00000006114	TADA3	transcriptional adaptor 3 [Source:HGNC Symbol;Acc:HGNC:19422]	Diploid	Diploid
ENSG00000072401	UBE2D1	ubiquitin-conjugating enzyme E2D 1 [Source:HGNC Symbol;Acc:12474]	ENSMMUG00000019825	UBE2D1	ubiquitin conjugating enzyme E2 D1 [Source:HGNC Symbol;Acc:HGNC:12474]	Diploid	Diploid
ENSG00000152495	CAMK4	calcium/calmodulin-dependent protein kinase IV [Source:HGNC Symbol;Acc:1464]	ENSMMUG00000011974	CAMK4	calcium/calmodulin dependent protein kinase IV [Source:HGNC Symbol;Acc:HGNC:1464]	Diploid	Diploid
ENSG00000196220	SRGAP3	SLIT-ROBO Rho GTPase activating protein 3 [Source:HGNC Symbol;Acc:19744]	ENSMMUG00000020014	SRGAP3	SLIT-ROBO Rho GTPase activating protein 3 [Source:HGNC Symbol;Acc:HGNC:19744]	Diploid	Diploid
ENSG00000177324	BEND2	BEN domain containing 2 [Source:HGNC Symbol;Acc:28509]	ENSMMUG00000019969	BEND2	BEN domain containing 2 [Source:HGNC Symbol;Acc:HGNC:28509]	Diploid	Diploid
ENSG00000116237	ICMT	isoprenylcysteine carboxyl methyltransferase [Source:HGNC Symbol;Acc:5350]	ENSMMUG00000018350	ICMT	isoprenylcysteine carboxyl methyltransferase [Source:HGNC Symbol;Acc:HGNC:5350]	Diploid	Diploid
ENSG00000106049	HIBADH	3-hydroxyisobutyrate dehydrogenase [Source:HGNC Symbol;Acc:4907]	ENSMMUG00000023134	HIBADH	3-hydroxyisobutyrate dehydrogenase [Source:HGNC Symbol;Acc:HGNC:4907]	Diploid	Diploid
ENSG00000132305	IMMT	inner membrane protein, mitochondrial [Source:HGNC Symbol;Acc:6047]	ENSMMUG00000015824	IMMT	inner membrane mitochondrial protein [Source:HGNC Symbol;Acc:HGNC:6047]	Diploid	Diploid
ENSG00000160932	LY6E	lymphocyte antigen 6 complex, locus E [Source:HGNC Symbol;Acc:6727]	ENSMMUG00000046292	LY6E	lymphocyte antigen 6 family member E [Source:HGNC Symbol;Acc:HGNC:6727]	Diploid	Diploid
ENSG00000166569	CPLX4	complexin 4 [Source:HGNC Symbol;Acc:24330]	ENSMMUG00000041950	CPLX4	complexin 4 [Source:HGNC Symbol;Acc:HGNC:24330]	Diploid	Diploid
ENSG00000149179	C11orf49	chromosome 11 open reading frame 49 [Source:HGNC Symbol;Acc:28720]	ENSMMUG00000006355	C14H11orf49	uncharacterized protein LOC713981 [Source:RefSeq peptide;Acc:NP_001253935]	Diploid	Diploid
ENSG00000130713	EXOSC2	exosome component 2 [Source:HGNC Symbol;Acc:17097]	ENSMMUG00000012498	EXOSC2	exosome component 2 [Source:HGNC Symbol;Acc:HGNC:17097]	Diploid	Diploid
ENSG00000148702	HABP2	hyaluronan binding protein 2 [Source:HGNC Symbol;Acc:4798]	ENSMMUG00000001207	HABP2	hyaluronan binding protein 2 [Source:HGNC Symbol;Acc:HGNC:4798]	Diploid	Diploid
ENSG00000165716	FAM69B	family with sequence similarity 69, member B [Source:HGNC Symbol;Acc:28290]	ENSMMUG00000044767	FAM69B	family with sequence similarity 69 member B [Source:HGNC Symbol;Acc:HGNC:28290]	Diploid	Diploid
ENSG00000165169	DYNLT3	dynein, light chain, Tctex-type 3 [Source:HGNC Symbol;Acc:11694]	ENSMMUG00000013221			Diploid	Diploid
ENSG00000108588	CCDC47	coiled-coil domain containing 47 [Source:HGNC Symbol;Acc:24856]	ENSMMUG00000016761	CCDC47	coiled-coil domain containing 47 [Source:HGNC Symbol;Acc:HGNC:24856]	Diploid	Diploid
ENSG00000144591	GMPPA	GDP-mannose pyrophosphorylase A [Source:HGNC Symbol;Acc:22923]	ENSMMUG00000017938	GMPPA	GDP-mannose pyrophosphorylase A [Source:HGNC Symbol;Acc:HGNC:22923]	Diploid	Diploid
ENSG00000148985	PGAP2	post-GPI attachment to proteins 2 [Source:HGNC Symbol;Acc:17893]	ENSMMUG00000003955	PGAP2	post-GPI attachment to proteins 2 [Source:HGNC Symbol;Acc:HGNC:17893]	Diploid	Diploid
ENSG00000109832	DDX25	DEAD (Asp-Glu-Ala-Asp) box helicase 25 [Source:HGNC Symbol;Acc:18698]	ENSMMUG00000007624	DDX25	DEAD-box helicase 25 [Source:HGNC Symbol;Acc:HGNC:18698]	Diploid	Diploid
ENSG00000110756	HPS5	Hermansky-Pudlak syndrome 5 [Source:HGNC Symbol;Acc:17022]	ENSMMUG00000017958	HPS5	HPS5, biogenesis of lysosomal organelles complex 2 subunit 2 [Source:HGNC Symbol;Acc:HGNC:17022]	Diploid	Diploid
ENSG00000101843	PSMD10	proteasome (prosome, macropain) 26S subunit, non-ATPase, 10 [Source:HGNC Symbol;Acc:9555]	ENSMMUG00000016981			Diploid	Diploid
ENSG00000114648	KLHL18	kelch-like family member 18 [Source:HGNC Symbol;Acc:29120]	ENSMMUG00000006454	KLHL18	kelch like family member 18 [Source:HGNC Symbol;Acc:HGNC:29120]	Diploid	Diploid
ENSG00000122257	RBBP6	retinoblastoma binding protein 6 [Source:HGNC Symbol;Acc:9889]	ENSMMUG00000015908	RBBP6	RB binding protein 6, ubiquitin ligase [Source:HGNC Symbol;Acc:HGNC:9889]	Diploid	Diploid
ENSG00000156873	PHKG2	phosphorylase kinase, gamma 2 (testis) [Source:HGNC Symbol;Acc:8931]	ENSMMUG00000020878	PHKG2	phosphorylase kinase catalytic subunit gamma 2 [Source:HGNC Symbol;Acc:HGNC:8931]	Diploid	Diploid
ENSG00000187922	LCN10	lipocalin 10 [Source:HGNC Symbol;Acc:20892]	ENSMMUG00000018753	LCN10	lipocalin 10 [Source:HGNC Symbol;Acc:HGNC:20892]	Diploid	Diploid
ENSG00000158286	RNF207	ring finger protein 207 [Source:HGNC Symbol;Acc:32947]	ENSMMUG00000038166	RNF207	ring finger protein 207 [Source:HGNC Symbol;Acc:HGNC:32947]	Diploid	Diploid
ENSG00000188613	NANOS1	nanos homolog 1 (Drosophila) [Source:HGNC Symbol;Acc:23044]	ENSMMUG00000048654	NANOS1	nanos C2HC-type zinc finger 1 [Source:HGNC Symbol;Acc:HGNC:23044]	Diploid	Diploid
ENSG00000153814	JAZF1	JAZF zinc finger 1 [Source:HGNC Symbol;Acc:28917]	ENSMMUG00000042360	JAZF1	JAZF zinc finger 1 [Source:HGNC Symbol;Acc:HGNC:28917]	Diploid	Diploid
ENSG00000151702	FLI1	Fli-1 proto-oncogene, ETS transcription factor [Source:HGNC Symbol;Acc:3749]	ENSMMUG00000003141	FLI1	Fli-1 proto-oncogene, ETS transcription factor [Source:HGNC Symbol;Acc:HGNC:3749]	Diploid	Diploid
ENSG00000100124	ANKRD54	ankyrin repeat domain 54 [Source:HGNC Symbol;Acc:25185]	ENSMMUG00000015254	ANKRD54	ankyrin repeat domain 54 [Source:HGNC Symbol;Acc:HGNC:25185]	Diploid	Diploid
ENSG00000168137	SETD5	SET domain containing 5 [Source:HGNC Symbol;Acc:25566]	ENSMMUG00000003943	SETD5	SET domain-containing protein 5 [Source:RefSeq peptide;Acc:NP_001252907]	Diploid	Diploid
ENSG00000211637	IGLV4-69	immunoglobulin lambda variable 4-69 [Source:HGNC Symbol;Acc:5921]	ENSMMUG00000031083	IGLV4-69	immunoglobulin lambda variable 4-69 [Source:HGNC Symbol;Acc:HGNC:5921]	Diploid	CNV as a whole
ENSG00000120729	MYOT	myotilin [Source:HGNC Symbol;Acc:12399]	ENSMMUG00000016356	MYOT	myotilin [Source:HGNC Symbol;Acc:HGNC:12399]	Diploid	Diploid
ENSG00000134072	CAMK1	calcium/calmodulin-dependent protein kinase I [Source:HGNC Symbol;Acc:1459]	ENSMMUG00000006120	CAMK1	calcium/calmodulin-dependent protein kinase type 1 [Source:RefSeq peptide;Acc:NP_001244800]	Diploid	Diploid
ENSG00000157578	LCA5L	Leber congenital amaurosis 5-like [Source:HGNC Symbol;Acc:1255]	ENSMMUG00000010407	LCA5L	LCA5L, lebercilin like [Source:HGNC Symbol;Acc:HGNC:1255]	Diploid	Diploid
ENSG00000149182	ARFGAP2	ADP-ribosylation factor GTPase activating protein 2 [Source:HGNC Symbol;Acc:13504]	ENSMMUG00000006357	ARFGAP2	ADP ribosylation factor GTPase activating protein 2 [Source:HGNC Symbol;Acc:HGNC:13504]	Diploid	Diploid
ENSG00000196653	ZNF502	zinc finger protein 502 [Source:HGNC Symbol;Acc:23718]	ENSMMUG00000009542	ZNF502	zinc finger protein 502 [Source:HGNC Symbol;Acc:HGNC:23718]	Diploid	Diploid
ENSG00000154229	PRKCA	protein kinase C, alpha [Source:HGNC Symbol;Acc:9393]	ENSMMUG00000018378	PRKCA	protein kinase C alpha [Source:HGNC Symbol;Acc:HGNC:9393]	Diploid	Diploid
ENSG00000168078	PBK	PDZ binding kinase [Source:HGNC Symbol;Acc:18282]	ENSMMUG00000016019	PBK	PDZ binding kinase [Source:HGNC Symbol;Acc:HGNC:18282]	Diploid	Diploid
ENSG00000152611	CAPSL	calcyphosine-like [Source:HGNC Symbol;Acc:28375]	ENSMMUG00000001678	CAPSL	calcyphosine like [Source:HGNC Symbol;Acc:HGNC:28375]	Diploid	Diploid
ENSG00000196118	C16orf93	chromosome 16 open reading frame 93 [Source:HGNC Symbol;Acc:28078]	ENSMMUG00000020880	CCDC189	coiled-coil domain containing 189 [Source:HGNC Symbol;Acc:HGNC:28078]	Diploid	Diploid
ENSG00000243543	WFDC6	WAP four-disulfide core domain 6 [Source:HGNC Symbol;Acc:16164]	ENSMMUG00000003809	WFDC6	WAP four-disulfide core domain 6 [Source:HGNC Symbol;Acc:HGNC:16164]	Diploid	Diploid
ENSG00000162571	TTLL10	tubulin tyrosine ligase-like family, member 10 [Source:HGNC Symbol;Acc:26693]	ENSMMUG00000045769	TTLL10	tubulin tyrosine ligase like 10 [Source:HGNC Symbol;Acc:HGNC:26693]	Diploid	Diploid
ENSG00000156990	RPUSD3	RNA pseudouridylate synthase domain containing 3 [Source:HGNC Symbol;Acc:28437]	ENSMMUG00000010628	RPUSD3	RNA pseudouridylate synthase domain containing 3 [Source:HGNC Symbol;Acc:HGNC:28437]	Diploid	Diploid
ENSG00000136738	STAM	signal transducing adaptor molecule (SH3 domain and ITAM motif) 1 [Source:HGNC Symbol;Acc:11357]	ENSMMUG00000001700	STAM	signal transducing adaptor molecule [Source:HGNC Symbol;Acc:HGNC:11357]	Diploid	Diploid
ENSG00000149089	APIP	APAF1 interacting protein [Source:HGNC Symbol;Acc:17581]	ENSMMUG00000006447	APIP	APAF1 interacting protein [Source:HGNC Symbol;Acc:HGNC:17581]	Diploid	Diploid
ENSG00000140506	LMAN1L	lectin, mannose-binding, 1 like [Source:HGNC Symbol;Acc:6632]	ENSMMUG00000012970	LMAN1L	lectin, mannose binding 1 like [Source:HGNC Symbol;Acc:HGNC:6632]	Diploid	Diploid
ENSG00000175315	CST6	cystatin E/M [Source:HGNC Symbol;Acc:2478]	ENSMMUG00000006095	CST6	cystatin E/M [Source:HGNC Symbol;Acc:HGNC:2478]	Diploid	Diploid
ENSG00000137440	FGFBP1	fibroblast growth factor binding protein 1 [Source:HGNC Symbol;Acc:19695]	ENSMMUG00000008162	FGFBP1	fibroblast growth factor binding protein 1 [Source:HGNC Symbol;Acc:HGNC:19695]	Diploid	Diploid
ENSG00000102098	SCML2	sex comb on midleg-like 2 (Drosophila) [Source:HGNC Symbol;Acc:10581]	ENSMMUG00000005084	SCML2	sex comb on midleg-like 2 (Drosophila) [Source:HGNC Symbol;Acc:HGNC:10581]	Diploid	Diploid
ENSG00000124171	PARD6B	par-6 family cell polarity regulator beta [Source:HGNC Symbol;Acc:16245]	ENSMMUG00000038148	PARD6B	par-6 family cell polarity regulator beta [Source:HGNC Symbol;Acc:HGNC:16245]	Diploid	Diploid
ENSG00000149503	INCENP	inner centromere protein antigens 135/155kDa [Source:HGNC Symbol;Acc:6058]	ENSMMUG00000004420	INCENP	inner centromere protein [Source:HGNC Symbol;Acc:HGNC:6058]	Diploid	Diploid
ENSG00000068697	LAPTM4A	lysosomal protein transmembrane 4 alpha [Source:HGNC Symbol;Acc:6924]	ENSMMUG00000001582	LAPTM4A	lysosomal protein transmembrane 4 alpha [Source:HGNC Symbol;Acc:HGNC:6924]	Diploid	Diploid
ENSG00000110435	PDHX	pyruvate dehydrogenase complex, component X [Source:HGNC Symbol;Acc:21350]	ENSMMUG00000006448	PDHX	pyruvate dehydrogenase complex component X [Source:HGNC Symbol;Acc:HGNC:21350]	Diploid	Diploid
ENSG00000168003	SLC3A2	solute carrier family 3 (amino acid transporter heavy chain), member 2 [Source:HGNC Symbol;Acc:11026]	ENSMMUG00000020354	SLC3A2	solute carrier family 3 member 2 [Source:HGNC Symbol;Acc:HGNC:11026]	Diploid	Diploid
ENSG00000184524	CEND1	cell cycle exit and neuronal differentiation 1 [Source:HGNC Symbol;Acc:24153]	ENSMMUG00000042839	CEND1	cell cycle exit and neuronal differentiation 1 [Source:HGNC Symbol;Acc:HGNC:24153]	Diploid	Diploid
ENSG00000213578	CPLX3	complexin 3 [Source:HGNC Symbol;Acc:27652]	ENSMMUG00000043994	CPLX3	complexin 3 [Source:HGNC Symbol;Acc:HGNC:27652]	Diploid	Diploid
ENSG00000145569	FAM105A	family with sequence similarity 105, member A [Source:HGNC Symbol;Acc:25629]	ENSMMUG00000005665	FAM105A	family with sequence similarity 105 member A [Source:HGNC Symbol;Acc:HGNC:25629]	Diploid	Diploid
ENSG00000198131	ZNF544	zinc finger protein 544 [Source:HGNC Symbol;Acc:16759]	ENSMMUG00000044329	ZNF544	zinc finger protein 544 [Source:HGNC Symbol;Acc:HGNC:16759]	Diploid	Diploid
ENSG00000167034	NKX3-1	NK3 homeobox 1 [Source:HGNC Symbol;Acc:7838]	ENSMMUG00000009796	NKX3-1	NK3 homeobox 1 [Source:HGNC Symbol;Acc:HGNC:7838]	Diploid	Diploid
ENSG00000165623	UCMA	upper zone of growth plate and cartilage matrix associated [Source:HGNC Symbol;Acc:25205]	ENSMMUG00000005603	UCMA	upper zone of growth plate and cartilage matrix associated [Source:HGNC Symbol;Acc:HGNC:25205]	Diploid	Diploid
ENSG00000147655	RSPO2	R-spondin 2 [Source:HGNC Symbol;Acc:28583]	ENSMMUG00000010745	RSPO2	R-spondin 2 [Source:HGNC Symbol;Acc:HGNC:28583]	Diploid	Diploid
ENSG00000102882	MAPK3	mitogen-activated protein kinase 3 [Source:HGNC Symbol;Acc:6877]	ENSMMUG00000017758	MAPK3	mitogen-activated protein kinase 3 [Source:HGNC Symbol;Acc:HGNC:6877]	Diploid	Diploid
ENSG00000137441	FGFBP2	fibroblast growth factor binding protein 2 [Source:HGNC Symbol;Acc:29451]	ENSMMUG00000008163	FGFBP2	fibroblast growth factor binding protein 2 [Source:HGNC Symbol;Acc:HGNC:29451]	Diploid	Diploid
ENSG00000047249	ATP6V1H	ATPase, H+ transporting, lysosomal 50/57kDa, V1 subunit H [Source:HGNC Symbol;Acc:18303]	ENSMMUG00000004064	ATP6V1H	ATPase H+ transporting V1 subunit H [Source:HGNC Symbol;Acc:HGNC:18303]	Diploid	Diploid
ENSG00000112337	SLC17A2	solute carrier family 17, member 2 [Source:HGNC Symbol;Acc:10930]	ENSMMUG00000002586	SLC17A2	solute carrier family 17 member 2 [Source:HGNC Symbol;Acc:HGNC:10930]	Diploid	Diploid
ENSG00000213654	GPSM3	G-protein signaling modulator 3 [Source:HGNC Symbol;Acc:13945]	ENSMMUG00000018459	GPSM3	G protein signaling modulator 3 [Source:HGNC Symbol;Acc:HGNC:13945]	Diploid	Diploid
ENSG00000074695	LMAN1	lectin, mannose-binding, 1 [Source:HGNC Symbol;Acc:6631]	ENSMMUG00000007580	LMAN1	lectin, mannose binding 1 [Source:HGNC Symbol;Acc:HGNC:6631]	Diploid	Diploid
ENSG00000007062	PROM1	prominin 1 [Source:HGNC Symbol;Acc:9454]	ENSMMUG00000008164	PROM1	prominin-1 precursor [Source:RefSeq peptide;Acc:NP_001070888]	Diploid	Diploid
ENSG00000107295	SH3GL2	SH3-domain GRB2-like 2 [Source:HGNC Symbol;Acc:10831]	ENSMMUG00000011704	SH3GL2	SH3 domain containing GRB2 like 2, endophilin A1 [Source:HGNC Symbol;Acc:HGNC:10831]	Diploid	Diploid
ENSG00000169679	BUB1	BUB1 mitotic checkpoint serine/threonine kinase [Source:HGNC Symbol;Acc:1148]	ENSMMUG00000017653	BUB1	BUB1 mitotic checkpoint serine/threonine kinase [Source:HGNC Symbol;Acc:HGNC:1148]	Diploid	Diploid
ENSG00000204301	NOTCH4	notch 4 [Source:HGNC Symbol;Acc:7884]	ENSMMUG00000018461	NOTCH4	notch 4 [Source:HGNC Symbol;Acc:HGNC:7884]	Diploid	Diploid
ENSG00000136244	IL6	interleukin 6 (interferon, beta 2) [Source:HGNC Symbol;Acc:6018]	ENSMMUG00000019983	IL6	interleukin 6 [Source:HGNC Symbol;Acc:HGNC:6018]	Diploid	Diploid
ENSG00000137757	CASP5	caspase 5, apoptosis-related cysteine peptidase [Source:HGNC Symbol;Acc:1506]	ENSMMUG00000009851	CASP5	caspase 5 [Source:HGNC Symbol;Acc:HGNC:1506]	Diploid	Diploid
ENSG00000214954	LRRC69	leucine rich repeat containing 69 [Source:HGNC Symbol;Acc:34303]	ENSMMUG00000013396	LRRC69	leucine rich repeat containing 69 [Source:HGNC Symbol;Acc:HGNC:34303]	Diploid	Diploid
ENSG00000115884	SDC1	syndecan 1 [Source:HGNC Symbol;Acc:10658]	ENSMMUG00000030922	SDC1	syndecan 1 [Source:HGNC Symbol;Acc:HGNC:10658]	Diploid	Diploid
ENSG00000182093	WRB	tryptophan rich basic protein [Source:HGNC Symbol;Acc:12790]	ENSMMUG00000020654			Diploid	Diploid
ENSG00000170340	B3GNT2	UDP-GlcNAc:betaGal beta-1,3-N-acetylglucosaminyltransferase 2 [Source:HGNC Symbol;Acc:15629]	ENSMMUG00000014181	B3GNT2	UDP-GlcNAc:betaGal beta-1,3-N-acetylglucosaminyltransferase 2 [Source:HGNC Symbol;Acc:HGNC:15629]	Diploid	Diploid
ENSG00000147606	SLC26A7	solute carrier family 26 (anion exchanger), member 7 [Source:HGNC Symbol;Acc:14467]	ENSMMUG00000019481	SLC26A7	solute carrier family 26 member 7 [Source:HGNC Symbol;Acc:HGNC:14467]	Diploid	Diploid
ENSG00000072195	SPEG	SPEG complex locus [Source:HGNC Symbol;Acc:16901]	ENSMMUG00000017936			Diploid	Diploid
ENSG00000082213	C5orf22	chromosome 5 open reading frame 22 [Source:HGNC Symbol;Acc:25639]	ENSMMUG00000012200	C5orf22	chromosome 5 open reading frame 22 [Source:HGNC Symbol;Acc:HGNC:25639]	Diploid	Diploid
ENSG00000070444	MNT	MAX network transcriptional repressor [Source:HGNC Symbol;Acc:7188]	ENSMMUG00000022004	MNT	MAX network transcriptional repressor [Source:HGNC Symbol;Acc:HGNC:7188]	Diploid	Diploid
ENSG00000172071	EIF2AK3	eukaryotic translation initiation factor 2-alpha kinase 3 [Source:HGNC Symbol;Acc:3255]	ENSMMUG00000009254	EIF2AK3	eukaryotic translation initiation factor 2 alpha kinase 3 [Source:HGNC Symbol;Acc:HGNC:3255]	Diploid	Diploid
ENSG00000267673	FDX1L	ferredoxin 1-like [Source:HGNC Symbol;Acc:30546]	ENSMMUG00000040341			Diploid	Diploid
ENSG00000076706	MCAM	melanoma cell adhesion molecule [Source:HGNC Symbol;Acc:6934]	ENSMMUG00000004764	MCAM	melanoma cell adhesion molecule [Source:HGNC Symbol;Acc:HGNC:6934]	Diploid	Diploid
ENSG00000166343	MSS51	MSS51 mitochondrial translational activator [Source:HGNC Symbol;Acc:21000]	ENSMMUG00000015711			Diploid	Diploid
ENSG00000142173	COL6A2	collagen, type VI, alpha 2 [Source:HGNC Symbol;Acc:2212]	ENSMMUG00000022317	COL6A2	collagen type VI alpha 2 chain [Source:HGNC Symbol;Acc:HGNC:2212]	Diploid	Diploid
ENSG00000108669	CYTH1	cytohesin 1 [Source:HGNC Symbol;Acc:9501]	ENSMMUG00000013313	CYTH1	cytohesin-1 [Source:RefSeq peptide;Acc:NP_001248726]	Diploid	Diploid
ENSG00000007866	TEAD3	TEA domain family member 3 [Source:HGNC Symbol;Acc:11716]	ENSMMUG00000015909	TEAD3	TEA domain transcription factor 3 [Source:HGNC Symbol;Acc:HGNC:11716]	Diploid	Diploid
ENSG00000104228	TRIM35	tripartite motif containing 35 [Source:HGNC Symbol;Acc:16285]	ENSMMUG00000010092	TRIM35	tripartite motif containing 35 [Source:HGNC Symbol;Acc:HGNC:16285]	Diploid	Diploid
ENSG00000170891	CYTL1	cytokine-like 1 [Source:HGNC Symbol;Acc:24435]	ENSMMUG00000016921	CYTL1	cytokine like 1 [Source:HGNC Symbol;Acc:HGNC:24435]	Diploid	Diploid
ENSG00000136490	LIMD2	LIM domain containing 2 [Source:HGNC Symbol;Acc:28142]	ENSMMUG00000016755	LIMD2	LIM domain containing 2 [Source:HGNC Symbol;Acc:HGNC:28142]	Diploid	Diploid
ENSG00000161847	RAVER1	ribonucleoprotein, PTB-binding 1 [Source:HGNC Symbol;Acc:30296]	ENSMMUG00000014897	RAVER1	ribonucleoprotein, PTB binding 1 [Source:HGNC Symbol;Acc:HGNC:30296]	Diploid	Diploid
ENSG00000174775	HRAS	Harvey rat sarcoma viral oncogene homolog [Source:HGNC Symbol;Acc:5173]	ENSMMUG00000021659	HRAS	HRas proto-oncogene, GTPase [Source:HGNC Symbol;Acc:HGNC:5173]	Diploid	Diploid
ENSG00000148123	LPPR1	Lipid phosphate phosphatase-related protein type 1 [Source:UniProtKB/Swiss-Prot;Acc:Q8TBJ4]	ENSMMUG00000001827	PLPPR1	phospholipid phosphatase related 1 [Source:HGNC Symbol;Acc:HGNC:25993]	Diploid	Diploid
ENSG00000170027	YWHAG	tyrosine 3-monooxygenase/tryptophan 5-monooxygenase activation protein, gamma [Source:HGNC Symbol;Acc:12852]	ENSMMUG00000004125	YWHAG	tyrosine 3-monooxygenase/tryptophan 5-monooxygenase activation protein gamma [Source:HGNC Symbol;Acc:HGNC:12852]	Diploid	Diploid
ENSG00000104490	NCALD	neurocalcin delta [Source:HGNC Symbol;Acc:7655]	ENSMMUG00000020996	NCALD	neurocalcin delta [Source:HGNC Symbol;Acc:HGNC:7655]	Diploid	Diploid
ENSG00000133710	SPINK5	serine peptidase inhibitor, Kazal type 5 [Source:HGNC Symbol;Acc:15464]	ENSMMUG00000017900	SPINK5	serine peptidase inhibitor, Kazal type 5 [Source:HGNC Symbol;Acc:HGNC:15464]	Diploid	Diploid
ENSG00000099840	IZUMO4	IZUMO family member 4 [Source:HGNC Symbol;Acc:26950]	ENSMMUG00000015660	IZUMO4	IZUMO family member 4 [Source:HGNC Symbol;Acc:HGNC:26950]	Diploid	Diploid
ENSG00000124641	MED20	mediator complex subunit 20 [Source:HGNC Symbol;Acc:16840]	ENSMMUG00000029683	MED20	mediator complex subunit 20 [Source:HGNC Symbol;Acc:HGNC:16840]	Diploid	Diploid
ENSG00000030419	IKZF2	IKAROS family zinc finger 2 (Helios) [Source:HGNC Symbol;Acc:13177]	ENSMMUG00000000381	IKZF2	IKAROS family zinc finger 2 [Source:HGNC Symbol;Acc:HGNC:13177]	Diploid	Diploid
ENSG00000166329	CCDC182	coiled-coil domain containing 182 [Source:HGNC Symbol;Acc:49392]	ENSMMUG00000041728	CCDC182	coiled-coil domain containing 182 [Source:HGNC Symbol;Acc:HGNC:49392]	Diploid	Diploid
ENSG00000266173	STRADA	STE20-related kinase adaptor alpha [Source:HGNC Symbol;Acc:30172]	ENSMMUG00000016757	STRADA	STE20-related kinase adaptor alpha [Source:HGNC Symbol;Acc:HGNC:30172]	Diploid	Diploid
ENSG00000141200	KIF2B	kinesin family member 2B [Source:HGNC Symbol;Acc:29443]	ENSMMUG00000014427	KIF2B	kinesin family member 2B [Source:HGNC Symbol;Acc:HGNC:29443]	Diploid	Diploid
ENSG00000166448	TMEM130	transmembrane protein 130 [Source:HGNC Symbol;Acc:25429]	ENSMMUG00000012377	TMEM130	transmembrane protein 130 [Source:HGNC Symbol;Acc:HGNC:25429]	Diploid	Diploid
ENSG00000141867	BRD4	bromodomain containing 4 [Source:HGNC Symbol;Acc:13575]	ENSMMUG00000021382	BRD4	bromodomain containing 4 [Source:HGNC Symbol;Acc:HGNC:13575]	Diploid	Diploid
ENSG00000172156	CCL11	chemokine (C-C motif) ligand 11 [Source:HGNC Symbol;Acc:10610]	ENSMMUG00000009783	CCL11	C-C motif chemokine ligand 11 [Source:HGNC Symbol;Acc:HGNC:10610]	Diploid	Diploid
ENSG00000204569	PPP1R10	protein phosphatase 1, regulatory subunit 10 [Source:HGNC Symbol;Acc:9284]	ENSMMUG00000006524	PPP1R10	protein phosphatase 1 regulatory subunit 10 [Source:HGNC Symbol;Acc:HGNC:9284]	Diploid	Diploid
ENSG00000129170	CSRP3	cysteine and glycine-rich protein 3 (cardiac LIM protein) [Source:HGNC Symbol;Acc:2472]	ENSMMUG00000019119	CSRP3	cysteine and glycine rich protein 3 [Source:HGNC Symbol;Acc:HGNC:2472]	Diploid	Diploid
ENSG00000063176	SPHK2	sphingosine kinase 2 [Source:HGNC Symbol;Acc:18859]	ENSMMUG00000022159	SPHK2	sphingosine kinase 2 [Source:HGNC Symbol;Acc:HGNC:18859]	Diploid	Diploid
ENSG00000181610	MRPS23	mitochondrial ribosomal protein S23 [Source:HGNC Symbol;Acc:14509]	ENSMMUG00000001913	MRPS23	mitochondrial ribosomal protein S23 [Source:HGNC Symbol;Acc:HGNC:14509]	Diploid	Diploid
ENSG00000159167	STC1	stanniocalcin 1 [Source:HGNC Symbol;Acc:11373]	ENSMMUG00000046186	STC1	stanniocalcin 1 [Source:HGNC Symbol;Acc:HGNC:11373]	Diploid	Diploid
ENSG00000072182	ASIC4	acid-sensing (proton-gated) ion channel family member 4 [Source:HGNC Symbol;Acc:21263]	ENSMMUG00000013244	ASIC4	acid sensing ion channel subunit family member 4 [Source:HGNC Symbol;Acc:HGNC:21263]	Diploid	Diploid
ENSG00000158639	PAGE5	P antigen family, member 5 (prostate associated) [Source:HGNC Symbol;Acc:29992]	ENSMMUG00000044833	PAGE5	PAGE family member 5 [Source:HGNC Symbol;Acc:HGNC:29992]	Diploid	Diploid
ENSG00000181374	CCL13	chemokine (C-C motif) ligand 13 [Source:HGNC Symbol;Acc:10611]	ENSMMUG00000009785	CCL13	C-C motif chemokine ligand 13 [Source:HGNC Symbol;Acc:HGNC:10611]	Diploid	Diploid
ENSG00000121966	CXCR4	chemokine (C-X-C motif) receptor 4 [Source:HGNC Symbol;Acc:2561]	ENSMMUG00000011918	CXCR4	C-X-C motif chemokine receptor 4 [Source:HGNC Symbol;Acc:HGNC:2561]	Diploid	Diploid
ENSG00000106686	SPATA6L	spermatogenesis associated 6-like [Source:HGNC Symbol;Acc:25472]	ENSMMUG00000000136	SPATA6L	spermatogenesis associated 6 like [Source:HGNC Symbol;Acc:HGNC:25472]	Diploid	Diploid
ENSG00000101247	NDUFAF5	NADH dehydrogenase (ubiquinone) complex I, assembly factor 5 [Source:HGNC Symbol;Acc:15899]	ENSMMUG00000012354	NDUFAF5	NADH:ubiquinone oxidoreductase complex assembly factor 5 [Source:HGNC Symbol;Acc:HGNC:15899]	Diploid	Diploid
ENSG00000166548	TK2	thymidine kinase 2, mitochondrial [Source:HGNC Symbol;Acc:11831]	ENSMMUG00000000029	TK2	thymidine kinase 2, mitochondrial [Source:HGNC Symbol;Acc:HGNC:11831]	Diploid	Diploid
ENSG00000144021	CIAO1	cytosolic iron-sulfur protein assembly 1 [Source:HGNC Symbol;Acc:14280]	ENSMMUG00000012872	CIAO1	cytosolic iron-sulfur assembly component 1 [Source:HGNC Symbol;Acc:HGNC:14280]	Diploid	Diploid
ENSG00000099625	C19orf26	chromosome 19 open reading frame 26 [Source:HGNC Symbol;Acc:28617]	ENSMMUG00000015768			Diploid	Diploid
ENSG00000155755	TMEM237	transmembrane protein 237 [Source:HGNC Symbol;Acc:14432]	ENSMMUG00000018147	ALS2CR4	transmembrane protein 237 [Source:HGNC Symbol;Acc:HGNC:14432]	Diploid	Diploid
ENSG00000180138	CSNK1A1L	casein kinase 1, alpha 1-like [Source:HGNC Symbol;Acc:20289]	ENSMMUG00000005012	CSNK1A1L	casein kinase 1 alpha 1 like [Source:HGNC Symbol;Acc:HGNC:20289]	Diploid	Diploid
ENSG00000108064	TFAM	transcription factor A, mitochondrial [Source:HGNC Symbol;Acc:11741]	ENSMMUG00000019829	TFAM	transcription factor A, mitochondrial [Source:HGNC Symbol;Acc:HGNC:11741]	Diploid	Diploid
ENSG00000105516	DBP	D site of albumin promoter (albumin D-box) binding protein [Source:HGNC Symbol;Acc:2697]	ENSMMUG00000022160	DBP	D-box binding PAR bZIP transcription factor [Source:HGNC Symbol;Acc:HGNC:2697]	Diploid	Diploid
ENSG00000130589	HELZ2	helicase with zinc finger 2, transcriptional coactivator [Source:HGNC Symbol;Acc:30021]	ENSMMUG00000006070	HELZ2	helicase with zinc finger 2 [Source:HGNC Symbol;Acc:HGNC:30021]	Diploid	Diploid
ENSG00000065882	TBC1D1	TBC1 (tre-2/USP6, BUB2, cdc16) domain family, member 1 [Source:HGNC Symbol;Acc:11578]	ENSMMUG00000000237	TBC1D1	TBC1 domain family member 1 [Source:HGNC Symbol;Acc:HGNC:11578]	Diploid	Diploid
ENSG00000112038	OPRM1	opioid receptor, mu 1 [Source:HGNC Symbol;Acc:8156]	ENSMMUG00000022691	OPRM1	opioid receptor mu 1 [Source:HGNC Symbol;Acc:HGNC:8156]	Diploid	Diploid
ENSG00000189350	FAM179A	family with sequence similarity 179, member A [Source:HGNC Symbol;Acc:33715]	ENSMMUG00000004324	TOGARAM2	TOG array regulator of axonemal microtubules 2 [Source:HGNC Symbol;Acc:HGNC:33715]	Diploid	Diploid
ENSG00000053918	KCNQ1	potassium voltage-gated channel, KQT-like subfamily, member 1 [Source:HGNC Symbol;Acc:6294]	ENSMMUG00000007742	KCNQ1	potassium voltage-gated channel subfamily Q member 1 [Source:HGNC Symbol;Acc:HGNC:6294]	Diploid	Diploid
ENSG00000176928	GCNT4	glucosaminyl (N-acetyl) transferase 4, core 2 [Source:HGNC Symbol;Acc:17973]	ENSMMUG00000043533	GCNT4	glucosaminyl (N-acetyl) transferase 4, core 2 [Source:HGNC Symbol;Acc:HGNC:17973]	Diploid	Diploid
ENSG00000147381	MAGEA4	melanoma antigen family A, 4 [Source:HGNC Symbol;Acc:6802]	ENSMMUG00000040274	MAGEA4	MAGE family member A4 [Source:HGNC Symbol;Acc:HGNC:6802]	Diploid	Diploid
ENSG00000184486	POU3F2	POU class 3 homeobox 2 [Source:HGNC Symbol;Acc:9215]	ENSMMUG00000001658	POU3F2	POU class 3 homeobox 2 [Source:HGNC Symbol;Acc:HGNC:9215]	Diploid	Diploid
ENSG00000179270	C2orf71	chromosome 2 open reading frame 71 [Source:HGNC Symbol;Acc:34383]	ENSMMUG00000004325	C2orf71	chromosome 2 open reading frame 71 [Source:HGNC Symbol;Acc:HGNC:34383]	Diploid	Diploid
ENSG00000155659	VSIG4	V-set and immunoglobulin domain containing 4 [Source:HGNC Symbol;Acc:17032]	ENSMMUG00000002750	VSIG4	V-set and immunoglobulin domain containing 4 [Source:HGNC Symbol;Acc:HGNC:17032]	Diploid	Diploid
ENSG00000067842	ATP2B3	ATPase, Ca++ transporting, plasma membrane 3 [Source:HGNC Symbol;Acc:816]	ENSMMUG00000011478	ATP2B3	ATPase plasma membrane Ca2+ transporting 3 [Source:HGNC Symbol;Acc:HGNC:816]	Diploid	Diploid
ENSG00000205250	E2F4	E2F transcription factor 4, p107/p130-binding [Source:HGNC Symbol;Acc:3118]	ENSMMUG00000020258	E2F4	E2F transcription factor 4 [Source:HGNC Symbol;Acc:HGNC:3118]	Diploid	Diploid
ENSG00000126456	IRF3	interferon regulatory factor 3 [Source:HGNC Symbol;Acc:6118]	ENSMMUG00000022735	IRF3	interferon regulatory factor 3 [Source:HGNC Symbol;Acc:HGNC:6118]	Diploid	Diploid
ENSG00000102048	ASB9	ankyrin repeat and SOCS box containing 9 [Source:HGNC Symbol;Acc:17184]	ENSMMUG00000004858	ASB9	ankyrin repeat and SOCS box containing 9 [Source:HGNC Symbol;Acc:HGNC:17184]	Diploid	Diploid
ENSG00000204279	PAGE3	P antigen family, member 3 (prostate associated) [Source:HGNC Symbol;Acc:4110]	ENSMMUG00000010324	PAGE3	PAGE family member 3 [Source:HGNC Symbol;Acc:HGNC:4110]	Diploid	Diploid
ENSG00000205808	PPAPDC2	phosphatidic acid phosphatase type 2 domain containing 2 [Source:HGNC Symbol;Acc:23682]	ENSMMUG00000031742	PLPP6	phospholipid phosphatase 6 [Source:HGNC Symbol;Acc:HGNC:23682]	Diploid	Diploid
ENSG00000106688	SLC1A1	solute carrier family 1 (neuronal/epithelial high affinity glutamate transporter, system Xag), member 1 [Source:HGNC Symbol;Acc:10939]	ENSMMUG00000000135	SLC1A1	solute carrier family 1 member 1 [Source:HGNC Symbol;Acc:HGNC:10939]	Diploid	Diploid
ENSG00000167916	KRT24	keratin 24 [Source:HGNC Symbol;Acc:18527]	ENSMMUG00000023592	KRT24	keratin 24 [Source:HGNC Symbol;Acc:HGNC:18527]	Diploid	Diploid
ENSG00000178175	ZNF366	zinc finger protein 366 [Source:HGNC Symbol;Acc:18316]	ENSMMUG00000003586	ZNF366	zinc finger protein 366 [Source:HGNC Symbol;Acc:HGNC:18316]	Diploid	Diploid
ENSG00000164318	EGFLAM	EGF-like, fibronectin type III and laminin G domains [Source:HGNC Symbol;Acc:26810]	ENSMMUG00000017163	EGFLAM	EGF like, fibronectin type III and laminin G domains [Source:HGNC Symbol;Acc:HGNC:26810]	Diploid	Diploid
ENSG00000112578	BYSL	bystin-like [Source:HGNC Symbol;Acc:1157]	ENSMMUG00000004416	BYSL	bystin like [Source:HGNC Symbol;Acc:HGNC:1157]	Diploid	Diploid
ENSG00000136810	TXN	thioredoxin [Source:HGNC Symbol;Acc:12435]	ENSMMUG00000037503			Diploid	Duplicated and fixed as a whole
ENSG00000181617	FDCSP	follicular dendritic cell secreted protein [Source:HGNC Symbol;Acc:19215]	ENSMMUG00000006030	FDCSP	follicular dendritic cell secreted protein [Source:HGNC Symbol;Acc:HGNC:19215]	Diploid	Diploid
ENSG00000147535	PPAPDC1B	phosphatidic acid phosphatase type 2 domain containing 1B [Source:HGNC Symbol;Acc:25026]	ENSMMUG00000019958	PLPP5	phospholipid phosphatase 5 [Source:HGNC Symbol;Acc:HGNC:25026]	Diploid	Diploid
ENSG00000173391	OLR1	oxidized low density lipoprotein (lectin-like) receptor 1 [Source:HGNC Symbol;Acc:8133]	ENSMMUG00000002191	OLR1	oxidized low density lipoprotein receptor 1 [Source:HGNC Symbol;Acc:HGNC:8133]	Diploid	Diploid
ENSG00000183287	CCBE1	collagen and calcium binding EGF domains 1 [Source:HGNC Symbol;Acc:29426]	ENSMMUG00000010402	CCBE1	collagen and calcium binding EGF domains 1 [Source:HGNC Symbol;Acc:HGNC:29426]	Diploid	Diploid
ENSG00000170604	IRF2BP1	interferon regulatory factor 2 binding protein 1 [Source:HGNC Symbol;Acc:21728]	ENSMMUG00000019680	IRF2BP1	interferon regulatory factor 2 binding protein 1 [Source:HGNC Symbol;Acc:HGNC:21728]	Diploid	Diploid
ENSG00000012983	MAP4K5	mitogen-activated protein kinase kinase kinase kinase 5 [Source:HGNC Symbol;Acc:6867]	ENSMMUG00000020550	MAP4K5	mitogen-activated protein kinase kinase kinase kinase 5 [Source:HGNC Symbol;Acc:HGNC:6867]	Diploid	Diploid
ENSG00000134640	MTNR1B	melatonin receptor 1B [Source:HGNC Symbol;Acc:7464]	ENSMMUG00000039236			Diploid	Diploid
ENSG00000268629	TEX13A		ENSMMUG00000006684	TEX13A	testis expressed 13A [Source:HGNC Symbol;Acc:HGNC:11735]	Diploid	Diploid
ENSG00000159753	RLTPR	RGD motif, leucine rich repeats, tropomodulin domain and proline-rich containing [Source:HGNC Symbol;Acc:27089]	ENSMMUG00000009799	CARMIL2	capping protein regulator and myosin 1 linker 2 [Source:HGNC Symbol;Acc:HGNC:27089]	Diploid	Diploid
ENSG00000108702	CCL1	chemokine (C-C motif) ligand 1 [Source:HGNC Symbol;Acc:10609]	ENSMMUG00000009786	CCL1	C-C motif chemokine ligand 1 [Source:HGNC Symbol;Acc:HGNC:10609]	Diploid	Diploid
ENSG00000189108	IL1RAPL2	interleukin 1 receptor accessory protein-like 2 [Source:HGNC Symbol;Acc:5997]	ENSMMUG00000006683	IL1RAPL2	interleukin 1 receptor accessory protein like 2 [Source:HGNC Symbol;Acc:HGNC:5997]	Diploid	Diploid
ENSG00000163697	APBB2	amyloid beta (A4) precursor protein-binding, family B, member 2 [Source:HGNC Symbol;Acc:582]	ENSMMUG00000012563	APBB2	amyloid beta precursor protein binding family B member 2 [Source:HGNC Symbol;Acc:HGNC:582]	Diploid	Diploid
ENSG00000173818	ENDOV	endonuclease V [Source:HGNC Symbol;Acc:26640]	ENSMMUG00000001285	ENDOV	endonuclease V [Source:HGNC Symbol;Acc:HGNC:26640]	Diploid	Diploid
ENSG00000185737	NRG3	neuregulin 3 [Source:HGNC Symbol;Acc:7999]	ENSMMUG00000017380			Diploid	Diploid
ENSG00000107537	PHYH	phytanoyl-CoA 2-hydroxylase [Source:HGNC Symbol;Acc:8940]	ENSMMUG00000023798	PHYH	phytanoyl-CoA dioxygenase, peroxisomal [Source:RefSeq peptide;Acc:NP_001182418]	Diploid	Diploid
ENSG00000078098	FAP	fibroblast activation protein, alpha [Source:HGNC Symbol;Acc:3590]	ENSMMUG00000003200	FAP	fibroblast activation protein alpha [Source:HGNC Symbol;Acc:HGNC:3590]	Diploid	Diploid
ENSG00000173261	PLAC8L1	PLAC8-like 1 [Source:HGNC Symbol;Acc:31746]	ENSMMUG00000006551	PLAC8L1	PLAC8 like 1 [Source:HGNC Symbol;Acc:HGNC:31746]	Diploid	Diploid
ENSG00000047648	ARHGAP6	Rho GTPase activating protein 6 [Source:HGNC Symbol;Acc:676]	ENSMMUG00000003896	ARHGAP6	Rho GTPase activating protein 6 [Source:HGNC Symbol;Acc:HGNC:676]	Diploid	Diploid
ENSG00000242173	ARHGDIG	Rho GDP dissociation inhibitor (GDI) gamma [Source:HGNC Symbol;Acc:680]	ENSMMUG00000000603	ARHGDIG	Rho GDP dissociation inhibitor gamma [Source:HGNC Symbol;Acc:HGNC:680]	Diploid	Diploid
ENSG00000155714	PDZD9	PDZ domain containing 9 [Source:HGNC Symbol;Acc:28740]	ENSMMUG00000018288	PDZD9	PDZ domain containing 9 [Source:HGNC Symbol;Acc:HGNC:28740]	Diploid	Diploid
ENSG00000115419	GLS	glutaminase [Source:HGNC Symbol;Acc:4331]	ENSMMUG00000005612	GLS	glutaminase [Source:HGNC Symbol;Acc:HGNC:4331]	Diploid	Diploid
ENSG00000165685	TMEM52B	transmembrane protein 52B [Source:HGNC Symbol;Acc:26438]	ENSMMUG00000044762	TMEM52B	transmembrane protein 52B [Source:HGNC Symbol;Acc:HGNC:26438]	Diploid	Diploid
ENSG00000135298	BAI3	brain-specific angiogenesis inhibitor 3 [Source:HGNC Symbol;Acc:945]	ENSMMUG00000046092	BAI3	adhesion G protein-coupled receptor B3 [Source:HGNC Symbol;Acc:HGNC:945]	Diploid	Diploid
ENSG00000197586	ENTPD6	ectonucleoside triphosphate diphosphohydrolase 6 (putative) [Source:HGNC Symbol;Acc:3368]	ENSMMUG00000011874	ENTPD6	ectonucleoside triphosphate diphosphohydrolase 6 (putative) [Source:HGNC Symbol;Acc:HGNC:3368]	Diploid	Diploid
ENSG00000171209	CSN3	casein kappa [Source:HGNC Symbol;Acc:2446]	ENSMMUG00000006031	CSN3	casein kappa [Source:HGNC Symbol;Acc:HGNC:2446]	Diploid	Diploid
ENSG00000076344	RGS11	regulator of G-protein signaling 11 [Source:HGNC Symbol;Acc:9993]	ENSMMUG00000000602	RGS11	regulator of G protein signaling 11 [Source:HGNC Symbol;Acc:HGNC:9993]	Diploid	Diploid
ENSG00000075340	ADD2	adducin 2 (beta) [Source:HGNC Symbol;Acc:244]	ENSMMUG00000010592	ADD2	adducin 2 [Source:HGNC Symbol;Acc:HGNC:244]	Diploid	Diploid
ENSG00000145309	CABS1	calcium-binding protein, spermatid-specific 1 [Source:HGNC Symbol;Acc:30710]	ENSMMUG00000006708	CABS1	calcium binding protein, spermatid associated 1 [Source:HGNC Symbol;Acc:HGNC:30710]	Diploid	Diploid
ENSG00000100796	SMEK1	SMEK homolog 1, suppressor of mek1 (Dictyostelium) [Source:HGNC Symbol;Acc:20219]	ENSMMUG00000014945	SMEK1	protein phosphatase 4 regulatory subunit 3A [Source:HGNC Symbol;Acc:HGNC:20219]	Diploid	Diploid
ENSG00000135299	ANKRD6	ankyrin repeat domain 6 [Source:HGNC Symbol;Acc:17280]	ENSMMUG00000003462	ANKRD6	ankyrin repeat domain 6 [Source:HGNC Symbol;Acc:HGNC:17280]	Diploid	Diploid
ENSG00000204193	TXNDC8	thioredoxin domain containing 8 (spermatozoa) [Source:HGNC Symbol;Acc:31454]	ENSMMUG00000010325	TXNDC8	thioredoxin domain containing 8 [Source:HGNC Symbol;Acc:HGNC:31454]	Diploid	Diploid
ENSG00000163126	ANKRD23	ankyrin repeat domain 23 [Source:HGNC Symbol;Acc:24470]	ENSMMUG00000007591	ANKRD23	ankyrin repeat domain 23 [Source:HGNC Symbol;Acc:HGNC:24470]	Diploid	Diploid
ENSG00000084754	HADHA	hydroxyacyl-CoA dehydrogenase/3-ketoacyl-CoA thiolase/enoyl-CoA hydratase (trifunctional protein), alpha subunit [Source:HGNC Symbol;Acc:4801]	ENSMMUG00000004380	HADHA	hydroxyacyl-CoA dehydrogenase trifunctional multienzyme complex subunit alpha [Source:HGNC Symbol;Acc:HGNC:4801]	Diploid	Diploid
ENSG00000102854	MSLN	mesothelin [Source:HGNC Symbol;Acc:7371]	ENSMMUG00000000835	MSLN	mesothelin [Source:HGNC Symbol;Acc:HGNC:7371]	Diploid	Diploid
ENSG00000094755	GABRP	gamma-aminobutyric acid (GABA) A receptor, pi [Source:HGNC Symbol;Acc:4089]	ENSMMUG00000000570	GABRP	gamma-aminobutyric acid type A receptor pi subunit [Source:HGNC Symbol;Acc:HGNC:4089]	Diploid	Diploid
ENSG00000004142	POLDIP2	polymerase (DNA-directed), delta interacting protein 2 [Source:HGNC Symbol;Acc:23781]	ENSMMUG00000019146	POLDIP2	polymerase (DNA-directed), delta interacting protein 2 [Source:RefSeq peptide;Acc:NP_001248642]	Diploid	Diploid
ENSG00000213949	ITGA1	integrin, alpha 1 [Source:HGNC Symbol;Acc:6134]	ENSMMUG00000001753	ITGA1	integrin subunit alpha 1 [Source:HGNC Symbol;Acc:HGNC:6134]	Diploid	Diploid
ENSG00000125630	POLR1B	polymerase (RNA) I polypeptide B, 128kDa [Source:HGNC Symbol;Acc:20454]	ENSMMUG00000009468	POLR1B	RNA polymerase I subunit B [Source:HGNC Symbol;Acc:HGNC:20454]	Diploid	Diploid
ENSG00000166546	BEAN1	brain expressed, associated with NEDD4, 1 [Source:HGNC Symbol;Acc:24160]	ENSMMUG00000043884			Diploid	Diploid
ENSG00000188425	NANOS2	nanos homolog 2 (Drosophila) [Source:HGNC Symbol;Acc:23292]	ENSMMUG00000008103	NANOS2	nanos C2HC-type zinc finger 2 [Source:HGNC Symbol;Acc:HGNC:23292]	Diploid	Diploid
ENSG00000109079	TNFAIP1	tumor necrosis factor, alpha-induced protein 1 (endothelial) [Source:HGNC Symbol;Acc:11894]	ENSMMUG00000019145	TNFAIP1	TNF alpha induced protein 1 [Source:HGNC Symbol;Acc:HGNC:11894]	Diploid	Diploid
ENSG00000173821	RNF213	ring finger protein 213 [Source:HGNC Symbol;Acc:14539]	ENSMMUG00000005455	RNF213	ring finger protein 213 [Source:HGNC Symbol;Acc:HGNC:14539]	Diploid	Diploid
ENSG00000111664	GNB3	guanine nucleotide binding protein (G protein), beta polypeptide 3 [Source:HGNC Symbol;Acc:4400]	ENSMMUG00000005190	GNB3	G protein subunit beta 3 [Source:HGNC Symbol;Acc:HGNC:4400]	Diploid	Diploid
ENSG00000125363	AMELX	amelogenin, X-linked [Source:HGNC Symbol;Acc:461]	ENSMMUG00000008256	AMELX	amelogenin, X isoform precursor [Source:RefSeq peptide;Acc:NP_001091983]	Diploid	Diploid
ENSG00000187601	MAGEH1	melanoma antigen family H, 1 [Source:HGNC Symbol;Acc:24092]	ENSMMUG00000046259	MAGEH1	MAGE family member H1 [Source:HGNC Symbol;Acc:HGNC:24092]	Diploid	Diploid
ENSG00000130703	OSBPL2	oxysterol binding protein-like 2 [Source:HGNC Symbol;Acc:15761]	ENSMMUG00000012623	OSBPL2	oxysterol binding protein like 2 [Source:HGNC Symbol;Acc:HGNC:15761]	Diploid	Diploid
ENSG00000111247	RAD51AP1	RAD51 associated protein 1 [Source:HGNC Symbol;Acc:16956]	ENSMMUG00000015189	RAD51AP1	RAD51 associated protein 1 [Source:HGNC Symbol;Acc:HGNC:16956]	Diploid	Diploid
ENSG00000247746	USP51	ubiquitin specific peptidase 51 [Source:HGNC Symbol;Acc:23086]	ENSMMUG00000037965	USP51	ubiquitin specific peptidase 51 [Source:HGNC Symbol;Acc:HGNC:23086]	Diploid	Diploid
ENSG00000152684	PELO	pelota homolog (Drosophila) [Source:HGNC Symbol;Acc:8829]	ENSMMUG00000039101	PELO	pelota mRNA surveillance and ribosome rescue factor [Source:HGNC Symbol;Acc:HGNC:8829]	Diploid	Diploid
ENSG00000164171	ITGA2	integrin, alpha 2 (CD49B, alpha 2 subunit of VLA-2 receptor) [Source:HGNC Symbol;Acc:6137]	ENSMMUG00000020448	ITGA2	integrin alpha-2 precursor [Source:RefSeq peptide;Acc:NP_001247751]	Diploid	Diploid
ENSG00000109046	WSB1	WD repeat and SOCS box containing 1 [Source:HGNC Symbol;Acc:19221]	ENSMMUG00000020226	WSB1	WD repeat and SOCS box containing 1 [Source:HGNC Symbol;Acc:HGNC:19221]	Diploid	Diploid
ENSG00000074410	CA12	carbonic anhydrase XII [Source:HGNC Symbol;Acc:1371]	ENSMMUG00000021338	CA12	carbonic anhydrase 12 precursor [Source:RefSeq peptide;Acc:NP_001244753]	Diploid	Diploid
ENSG00000153046	CDYL	chromodomain protein, Y-like [Source:HGNC Symbol;Acc:1811]	ENSMMUG00000004964	CDYL	chromodomain Y like [Source:HGNC Symbol;Acc:HGNC:1811]	Diploid	Diploid
ENSG00000111665	CDCA3	cell division cycle associated 3 [Source:HGNC Symbol;Acc:14624]	ENSMMUG00000005191	CDCA3	cell division cycle associated 3 [Source:HGNC Symbol;Acc:HGNC:14624]	Diploid	Diploid
ENSG00000185963	BICD2	bicaudal D homolog 2 (Drosophila) [Source:HGNC Symbol;Acc:17208]	ENSMMUG00000001061	BICD2	protein bicaudal D homolog 2 [Source:RefSeq peptide;Acc:NP_001244885]	Diploid	Diploid
ENSG00000137500	CCDC90B	coiled-coil domain containing 90B [Source:HGNC Symbol;Acc:28108]	ENSMMUG00000020154	CCDC90B	coiled-coil domain containing 90B [Source:HGNC Symbol;Acc:HGNC:28108]	Diploid	Diploid
ENSG00000162148	PPP1R32	protein phosphatase 1, regulatory subunit 32 [Source:HGNC Symbol;Acc:28869]	ENSMMUG00000014913			Diploid	Diploid
ENSG00000178372	CALML5	calmodulin-like 5 [Source:HGNC Symbol;Acc:18180]	ENSMMUG00000017446	CALML5	calmodulin like 5 [Source:HGNC Symbol;Acc:HGNC:18180]	Diploid	Diploid
ENSG00000121361	KCNJ8	potassium inwardly-rectifying channel, subfamily J, member 8 [Source:HGNC Symbol;Acc:6269]	ENSMMUG00000020805	KCNJ8	potassium voltage-gated channel subfamily J member 8 [Source:HGNC Symbol;Acc:HGNC:6269]	Diploid	Diploid
ENSG00000115286	NDUFS7	NADH dehydrogenase (ubiquinone) Fe-S protein 7, 20kDa (NADH-coenzyme Q reductase) [Source:HGNC Symbol;Acc:7714]	ENSMMUG00000003045	NDUFS7	NADH:ubiquinone oxidoreductase core subunit S7 [Source:HGNC Symbol;Acc:HGNC:7714]	Diploid	Diploid
ENSG00000152953	STK32B	serine/threonine kinase 32B [Source:HGNC Symbol;Acc:14217]	ENSMMUG00000016922	STK32B	serine/threonine kinase 32B [Source:HGNC Symbol;Acc:HGNC:14217]	Diploid	Diploid
ENSG00000107758	PPP3CB	protein phosphatase 3, catalytic subunit, beta isozyme [Source:HGNC Symbol;Acc:9315]	ENSMMUG00000015714	PPP3CB	protein phosphatase 3 catalytic subunit beta [Source:HGNC Symbol;Acc:HGNC:9315]	Diploid	Diploid
ENSG00000126500	FLRT1	fibronectin leucine rich transmembrane protein 1 [Source:HGNC Symbol;Acc:3760]	ENSMMUG00000000482	FLRT1	fibronectin leucine rich transmembrane protein 1 [Source:HGNC Symbol;Acc:HGNC:3760]	Diploid	Diploid
ENSG00000107816	LZTS2	leucine zipper, putative tumor suppressor 2 [Source:HGNC Symbol;Acc:29381]	ENSMMUG00000010674	LZTS2	leucine zipper tumor suppressor 2 [Source:HGNC Symbol;Acc:HGNC:29381]	Diploid	Diploid
ENSG00000104738	MCM4	minichromosome maintenance complex component 4 [Source:HGNC Symbol;Acc:6947]	ENSMMUG00000015360	MCM4	DNA replication licensing factor MCM4 [Source:RefSeq peptide;Acc:NP_001253132]	Diploid	Diploid
ENSG00000137558	PI15	peptidase inhibitor 15 [Source:HGNC Symbol;Acc:8946]	ENSMMUG00000002951	PI15	peptidase inhibitor 15 [Source:HGNC Symbol;Acc:HGNC:8946]	Diploid	Diploid
ENSG00000225614	ZNF469	zinc finger protein 469 [Source:HGNC Symbol;Acc:23216]	ENSMMUG00000046821	ZNF469	zinc finger protein 469 [Source:HGNC Symbol;Acc:HGNC:23216]	Diploid	Diploid
ENSG00000117122	MFAP2	microfibrillar-associated protein 2 [Source:HGNC Symbol;Acc:7033]	ENSMMUG00000001420	MFAP2	microfibril associated protein 2 [Source:HGNC Symbol;Acc:HGNC:7033]	Diploid	Diploid
ENSG00000107819	SFXN3	sideroflexin 3 [Source:HGNC Symbol;Acc:16087]	ENSMMUG00000022620	SFXN3	sideroflexin 3 [Source:HGNC Symbol;Acc:HGNC:16087]	Diploid	Diploid
ENSG00000171703	TCEA2	transcription elongation factor A (SII), 2 [Source:HGNC Symbol;Acc:11614]	ENSMMUG00000018878	TCEA2	transcription elongation factor A2 [Source:HGNC Symbol;Acc:HGNC:11614]	Diploid	Diploid
ENSG00000176956	LY6H	lymphocyte antigen 6 complex, locus H [Source:HGNC Symbol;Acc:6728]	ENSMMUG00000014830	LY6H	lymphocyte antigen 6H precursor [Source:RefSeq peptide;Acc:NP_001252959]	Diploid	Diploid
ENSG00000123908	AGO2	argonaute RISC catalytic component 2 [Source:HGNC Symbol;Acc:3263]	ENSMMUG00000008045	AGO2	argonaute 2, RISC catalytic component [Source:HGNC Symbol;Acc:HGNC:3263]	Diploid	Diploid
ENSG00000230989	HSBP1	heat shock factor binding protein 1 [Source:HGNC Symbol;Acc:5203]	ENSMMUG00000020115	HSBP1	heat shock factor binding protein 1 [Source:HGNC Symbol;Acc:HGNC:5203]	Diploid	Diploid
ENSG00000148200	NR6A1	nuclear receptor subfamily 6, group A, member 1 [Source:HGNC Symbol;Acc:7985]	ENSMMUG00000011185	NR6A1	nuclear receptor subfamily 6 group A member 1 [Source:HGNC Symbol;Acc:HGNC:7985]	Diploid	Diploid
ENSG00000178602	OTOS	otospiralin [Source:HGNC Symbol;Acc:22644]	ENSMMUG00000040475	OTOS	otospiralin [Source:HGNC Symbol;Acc:HGNC:22644]	Diploid	Diploid
ENSG00000146267	FAXC	failed axon connections homolog (Drosophila) [Source:HGNC Symbol;Acc:20742]	ENSMMUG00000005923	C6orf168	failed axon connections homolog [Source:HGNC Symbol;Acc:HGNC:20742]	Diploid	Diploid
ENSG00000164733	CTSB	cathepsin B [Source:HGNC Symbol;Acc:2527]	ENSMMUG00000019212	CTSB	cathepsin B [Source:HGNC Symbol;Acc:HGNC:2527]	Diploid	Diploid
ENSG00000169575	VPREB1	pre-B lymphocyte 1 [Source:HGNC Symbol;Acc:12709]	ENSMMUG00000023195	VPREB1	V-set pre-B cell surrogate light chain 1 [Source:HGNC Symbol;Acc:HGNC:12709]	Diploid	Diploid
ENSG00000103494	RPGRIP1L	RPGRIP1-like [Source:HGNC Symbol;Acc:29168]	ENSMMUG00000020580	RPGRIP1L	RPGRIP1-like [Source:RefSeq peptide;Acc:NP_001244352]	Diploid	Diploid
ENSG00000204001	LCN8	lipocalin 8 [Source:HGNC Symbol;Acc:27038]	ENSMMUG00000001834	LCN8	epididymal-specific lipocalin-8 precursor [Source:RefSeq peptide;Acc:NP_001165311]	Diploid	Diploid
ENSG00000178363	CALML3	calmodulin-like 3 [Source:HGNC Symbol;Acc:1452]	ENSMMUG00000039016	CALML3	calmodulin like 3 [Source:HGNC Symbol;Acc:HGNC:1452]	Diploid	Diploid
ENSG00000186416	NKRF	NFKB repressing factor [Source:HGNC Symbol;Acc:19374]	ENSMMUG00000022670	NKRF	NFKB repressing factor [Source:HGNC Symbol;Acc:HGNC:19374]	Diploid	Diploid
ENSG00000069206	ADAM7	ADAM metallopeptidase domain 7 [Source:HGNC Symbol;Acc:214]	ENSMMUG00000007909	ADAM7	ADAM metallopeptidase domain 7 [Source:HGNC Symbol;Acc:HGNC:214]	Diploid	Diploid
ENSG00000164211	STARD4	StAR-related lipid transfer (START) domain containing 4 [Source:HGNC Symbol;Acc:18058]	ENSMMUG00000008563	STARD4	StAR related lipid transfer domain containing 4 [Source:HGNC Symbol;Acc:HGNC:18058]	Diploid	Diploid
ENSG00000186891	TNFRSF18	tumor necrosis factor receptor superfamily, member 18 [Source:HGNC Symbol;Acc:11914]	ENSMMUG00000014205	TNFRSF18	TNF receptor superfamily member 18 [Source:HGNC Symbol;Acc:HGNC:11914]	Diploid	Diploid
ENSG00000128536	CDHR3	cadherin-related family member 3 [Source:HGNC Symbol;Acc:26308]	ENSMMUG00000008189			Diploid	Diploid
ENSG00000139044	B4GALNT3	beta-1,4-N-acetyl-galactosaminyl transferase 3 [Source:HGNC Symbol;Acc:24137]	ENSMMUG00000013894	B4GALNT3	beta-1,4-N-acetyl-galactosaminyltransferase 3 [Source:HGNC Symbol;Acc:HGNC:24137]	Diploid	Diploid
ENSG00000077721	UBE2A	ubiquitin-conjugating enzyme E2A [Source:HGNC Symbol;Acc:12472]	ENSMMUG00000022667	UBE2A	ubiquitin conjugating enzyme E2 A [Source:HGNC Symbol;Acc:HGNC:12472]	Diploid	Diploid
ENSG00000156103	MMP16	matrix metallopeptidase 16 (membrane-inserted) [Source:HGNC Symbol;Acc:7162]	ENSMMUG00000013193	MMP16	matrix metallopeptidase 16 [Source:HGNC Symbol;Acc:HGNC:7162]	Diploid	Diploid
ENSG00000169047	IRS1	insulin receptor substrate 1 [Source:HGNC Symbol;Acc:6125]	ENSMMUG00000019467	IRS1	insulin receptor substrate 1 [Source:HGNC Symbol;Acc:HGNC:6125]	Diploid	Diploid
ENSG00000179588	ZFPM1	zinc finger protein, FOG family member 1 [Source:HGNC Symbol;Acc:19762]	ENSMMUG00000047141	ZFPM1	zinc finger protein, FOG family member 1 [Source:HGNC Symbol;Acc:HGNC:19762]	Diploid	Diploid
ENSG00000101974	ATP11C	ATPase, class VI, type 11C [Source:HGNC Symbol;Acc:13554]	ENSMMUG00000007234	ATP11C	ATPase phospholipid transporting 11C [Source:HGNC Symbol;Acc:HGNC:13554]	Diploid	Diploid
ENSG00000075461	CACNG4	calcium channel, voltage-dependent, gamma subunit 4 [Source:HGNC Symbol;Acc:1408]	ENSMMUG00000039129	CACNG4	calcium voltage-gated channel auxiliary subunit gamma 4 [Source:HGNC Symbol;Acc:HGNC:1408]	Diploid	Diploid
ENSG00000166025	AMOTL1	angiomotin like 1 [Source:HGNC Symbol;Acc:17811]	ENSMMUG00000001730	AMOTL1	angiomotin like 1 [Source:HGNC Symbol;Acc:HGNC:17811]	Diploid	Diploid
ENSG00000223350	IGLV9-49	immunoglobulin lambda variable 9-49 [Source:HGNC Symbol;Acc:5933]	ENSMMUG00000007440	IGLV9-49	immunoglobulin lambda variable 9-49 [Source:HGNC Symbol;Acc:HGNC:5933]	Diploid	Diploid
ENSG00000164307	ERAP1	endoplasmic reticulum aminopeptidase 1 [Source:HGNC Symbol;Acc:18173]	ENSMMUG00000002063	ERAP1	endoplasmic reticulum aminopeptidase 1 [Source:HGNC Symbol;Acc:HGNC:18173]	Diploid	Diploid
ENSG00000165192	ASB11	ankyrin repeat and SOCS box containing 11 [Source:HGNC Symbol;Acc:17186]	ENSMMUG00000044685	ASB11	ankyrin repeat and SOCS box containing 11 [Source:HGNC Symbol;Acc:HGNC:17186]	Diploid	Diploid
ENSG00000101126	ADNP	activity-dependent neuroprotector homeobox [Source:HGNC Symbol;Acc:15766]	ENSMMUG00000002761	ADNP	activity dependent neuroprotector homeobox [Source:HGNC Symbol;Acc:HGNC:15766]	Diploid	Diploid
ENSG00000101844	ATG4A	autophagy related 4A, cysteine peptidase [Source:HGNC Symbol;Acc:16489]	ENSMMUG00000007190	ATG4A	autophagy related 4A cysteine peptidase [Source:HGNC Symbol;Acc:HGNC:16489]	Diploid	Diploid
ENSG00000105063	PPP6R1	protein phosphatase 6, regulatory subunit 1 [Source:HGNC Symbol;Acc:29195]	ENSMMUG00000020520	PPP6R1	protein phosphatase 6 regulatory subunit 1 [Source:HGNC Symbol;Acc:HGNC:29195]	Diploid	Diploid
ENSG00000134627	PIWIL4	piwi-like RNA-mediated gene silencing 4 [Source:HGNC Symbol;Acc:18444]	ENSMMUG00000008965	PIWIL4	piwi like RNA-mediated gene silencing 4 [Source:HGNC Symbol;Acc:HGNC:18444]	Diploid	Diploid
ENSG00000164484	TMEM200A	transmembrane protein 200A [Source:HGNC Symbol;Acc:21075]	ENSMMUG00000006374	TMEM200A	transmembrane protein 200A [Source:HGNC Symbol;Acc:HGNC:21075]	Diploid	Diploid
ENSG00000138615	CILP	cartilage intermediate layer protein, nucleotide pyrophosphohydrolase [Source:HGNC Symbol;Acc:1980]	ENSMMUG00000009659	CILP	cartilage intermediate layer protein [Source:HGNC Symbol;Acc:HGNC:1980]	Diploid	Diploid
ENSG00000157538	DSCR3	Down syndrome critical region gene 3 [Source:HGNC Symbol;Acc:3044]	ENSMMUG00000006962	DSCR3	DSCR3 arrestin fold containing [Source:HGNC Symbol;Acc:HGNC:3044]	Diploid	Diploid
ENSG00000166263	STXBP4	syntaxin binding protein 4 [Source:HGNC Symbol;Acc:19694]	ENSMMUG00000010546	STXBP4	syntaxin binding protein 4 [Source:HGNC Symbol;Acc:HGNC:19694]	Diploid	Diploid
ENSG00000010704	HFE	hemochromatosis [Source:HGNC Symbol;Acc:4886]	ENSMMUG00000023733	HFE	hemochromatosis [Source:HGNC Symbol;Acc:HGNC:4886]	Diploid	Diploid
ENSG00000135632	SMYD5	SMYD family member 5 [Source:HGNC Symbol;Acc:16258]	ENSMMUG00000012445	SMYD5	SMYD family member 5 [Source:HGNC Symbol;Acc:HGNC:16258]	Diploid	Diploid
ENSG00000144468	RHBDD1	rhomboid domain containing 1 [Source:HGNC Symbol;Acc:23081]	ENSMMUG00000000722	RHBDD1	rhomboid domain containing 1 [Source:HGNC Symbol;Acc:HGNC:23081]	Diploid	Diploid
ENSG00000170178	HOXD12	homeobox D12 [Source:HGNC Symbol;Acc:5135]	ENSMMUG00000023501	HOXD12	homeobox D12 [Source:HGNC Symbol;Acc:HGNC:5135]	Diploid	Diploid
ENSG00000136870	ZNF189	zinc finger protein 189 [Source:HGNC Symbol;Acc:12980]	ENSMMUG00000023795	ZNF189	zinc finger protein 189 [Source:RefSeq peptide;Acc:NP_001248538]	Diploid	Diploid
ENSG00000128710	HOXD10	homeobox D10 [Source:HGNC Symbol;Acc:5133]	ENSMMUG00000046368	HOXD10	homeobox D10 [Source:HGNC Symbol;Acc:HGNC:5133]	Diploid	Diploid
ENSG00000139197	PEX5	peroxisomal biogenesis factor 5 [Source:HGNC Symbol;Acc:9719]	ENSMMUG00000004242	PEX5	peroxisomal biogenesis factor 5 [Source:HGNC Symbol;Acc:HGNC:9719]	Diploid	Diploid
ENSG00000165494	PCF11	PCF11 cleavage and polyadenylation factor subunit [Source:HGNC Symbol;Acc:30097]	ENSMMUG00000005029	PCF11	PCF11 cleavage and polyadenylation factor subunit [Source:HGNC Symbol;Acc:HGNC:30097]	Diploid	Diploid
ENSG00000177984	LCN15	lipocalin 15 [Source:HGNC Symbol;Acc:33777]	ENSMMUG00000004815	LCN15	lipocalin 15 [Source:HGNC Symbol;Acc:HGNC:33777]	Diploid	Diploid
ENSG00000165905	GYLTL1B	glycosyltransferase-like 1B [Source:HGNC Symbol;Acc:16522]	ENSMMUG00000002611	LARGE2	LARGE xylosyl- and glucuronyltransferase 2 [Source:HGNC Symbol;Acc:HGNC:16522]	Diploid	Diploid
ENSG00000169884	WNT10B	wingless-type MMTV integration site family, member 10B [Source:HGNC Symbol;Acc:12775]	ENSMMUG00000015705			Diploid	Diploid
ENSG00000119599	DCAF4	DDB1 and CUL4 associated factor 4 [Source:HGNC Symbol;Acc:20229]	ENSMMUG00000003625	DCAF4	DDB1 and CUL4 associated factor 4 [Source:HGNC Symbol;Acc:HGNC:20229]	Diploid	Diploid
ENSG00000109787	KLF3	Kruppel-like factor 3 (basic) [Source:HGNC Symbol;Acc:16516]	ENSMMUG00000003363	KLF3	Kruppel like factor 3 [Source:HGNC Symbol;Acc:HGNC:16516]	Diploid	Diploid
ENSG00000147509	RGS20	regulator of G-protein signaling 20 [Source:HGNC Symbol;Acc:14600]	ENSMMUG00000015417	RGS20	regulator of G protein signaling 20 [Source:HGNC Symbol;Acc:HGNC:14600]	Diploid	Diploid
ENSG00000143878	RHOB	ras homolog family member B [Source:HGNC Symbol;Acc:668]	ENSMMUG00000040501	RHOB	rho-related GTP-binding protein RhoB [Source:RefSeq peptide;Acc:NP_001181705]	Diploid	Diploid
ENSG00000118518	RNF146	ring finger protein 146 [Source:HGNC Symbol;Acc:21336]	ENSMMUG00000015354	RNF146	ring finger protein 146 [Source:HGNC Symbol;Acc:HGNC:21336]	Diploid	Diploid
ENSG00000109113	RAB34	RAB34, member RAS oncogene family [Source:HGNC Symbol;Acc:16519]	ENSMMUG00000007293	RAB34	RAB34, member RAS oncogene family [Source:HGNC Symbol;Acc:HGNC:16519]	Diploid	Diploid
ENSG00000187689	AMTN	amelotin [Source:HGNC Symbol;Acc:33188]	ENSMMUG00000003025	AMTN	amelotin [Source:HGNC Symbol;Acc:HGNC:33188]	Diploid	Diploid
ENSG00000124486	USP9X	ubiquitin specific peptidase 9, X-linked [Source:HGNC Symbol;Acc:12632]	ENSMMUG00000013753	USP9X	ubiquitin specific peptidase 9, X-linked [Source:HGNC Symbol;Acc:HGNC:12632]	Diploid	Diploid
ENSG00000177731	FLII	flightless I homolog (Drosophila) [Source:HGNC Symbol;Acc:3750]	ENSMMUG00000018355	FLII	FLII, actin remodeling protein [Source:HGNC Symbol;Acc:HGNC:3750]	Diploid	Diploid
ENSG00000164626	KCNK5	potassium channel, subfamily K, member 5 [Source:HGNC Symbol;Acc:6280]	ENSMMUG00000008993	KCNK5	potassium two pore domain channel subfamily K member 5 [Source:HGNC Symbol;Acc:HGNC:6280]	Diploid	Diploid
ENSG00000185352	HS6ST3	heparan sulfate 6-O-sulfotransferase 3 [Source:HGNC Symbol;Acc:19134]	ENSMMUG00000005847			Diploid	Diploid
ENSG00000186393	KRT26	keratin 26 [Source:HGNC Symbol;Acc:30840]	ENSMMUG00000001495	KRT26	keratin 26 [Source:HGNC Symbol;Acc:HGNC:30840]	Diploid	Diploid
ENSG00000176973	FAM89B	family with sequence similarity 89, member B [Source:HGNC Symbol;Acc:16708]	ENSMMUG00000031183	FAM89B	protein FAM89B [Source:RefSeq peptide;Acc:NP_001181711]	Diploid	Diploid
ENSG00000142611	PRDM16	PR domain containing 16 [Source:HGNC Symbol;Acc:14000]	ENSMMUG00000009350	PRDM16	PR/SET domain 16 [Source:HGNC Symbol;Acc:HGNC:14000]	Diploid	Diploid
ENSG00000173465	SSSCA1	Sjogren syndrome/scleroderma autoantigen 1 [Source:HGNC Symbol;Acc:11328]	ENSMMUG00000044084	SSSCA1	Sjogren syndrome/scleroderma autoantigen 1 [Source:HGNC Symbol;Acc:HGNC:11328]	Diploid	Diploid
ENSG00000097007	ABL1	c-abl oncogene 1, non-receptor tyrosine kinase [Source:HGNC Symbol;Acc:76]	ENSMMUG00000012499	ABL1	ABL proto-oncogene 1, non-receptor tyrosine kinase [Source:HGNC Symbol;Acc:HGNC:76]	Diploid	Diploid
ENSG00000008438	PGLYRP1	peptidoglycan recognition protein 1 [Source:HGNC Symbol;Acc:8904]	ENSMMUG00000008742	PGLYRP1	peptidoglycan recognition protein 1 [Source:HGNC Symbol;Acc:HGNC:8904]	Diploid	Diploid
ENSG00000165632	TAF3	TAF3 RNA polymerase II, TATA box binding protein (TBP)-associated factor, 140kDa [Source:HGNC Symbol;Acc:17303]	ENSMMUG00000013101	TAF3	TATA-box binding protein associated factor 3 [Source:HGNC Symbol;Acc:HGNC:17303]	Diploid	Diploid
ENSG00000177963	RIC8A	RIC8 guanine nucleotide exchange factor A [Source:HGNC Symbol;Acc:29550]	ENSMMUG00000011506	RIC8A	RIC8 guanine nucleotide exchange factor A [Source:HGNC Symbol;Acc:HGNC:29550]	Diploid	Diploid
ENSG00000105679	GAPDHS	glyceraldehyde-3-phosphate dehydrogenase, spermatogenic [Source:HGNC Symbol;Acc:24864]	ENSMMUG00000000837	GAPDHS	glyceraldehyde-3-phosphate dehydrogenase, spermatogenic [Source:HGNC Symbol;Acc:HGNC:24864]	Diploid	Diploid
ENSG00000164237	CMBL	carboxymethylenebutenolidase homolog (Pseudomonas) [Source:HGNC Symbol;Acc:25090]	ENSMMUG00000020113	CMBL	carboxymethylenebutenolidase homolog [Source:HGNC Symbol;Acc:HGNC:25090]	Diploid	Diploid
ENSG00000102287	GABRE	gamma-aminobutyric acid (GABA) A receptor, epsilon [Source:HGNC Symbol;Acc:4085]	ENSMMUG00000010936	GABRE	gamma-aminobutyric acid type A receptor epsilon subunit [Source:HGNC Symbol;Acc:HGNC:4085]	Diploid	Diploid
ENSG00000204252	HLA-DOA	major histocompatibility complex, class II, DO alpha [Source:HGNC Symbol;Acc:4936]	ENSMMUG00000015734	HLA-DOA	major histocompatibility complex, class II, DO alpha [Source:HGNC Symbol;Acc:HGNC:4936]	Diploid	Diploid
ENSG00000096696	DSP	desmoplakin [Source:HGNC Symbol;Acc:3052]	ENSMMUG00000014784	DSP	desmoplakin [Source:HGNC Symbol;Acc:HGNC:3052]	Diploid	Diploid
ENSG00000151491	EPS8	epidermal growth factor receptor pathway substrate 8 [Source:HGNC Symbol;Acc:3420]	ENSMMUG00000020431	EPS8	epidermal growth factor receptor kinase substrate 8 [Source:RefSeq peptide;Acc:NP_001244846]	Diploid	Diploid
ENSG00000167657	DAPK3	death-associated protein kinase 3 [Source:HGNC Symbol;Acc:2676]	ENSMMUG00000022765	DAPK3	death associated protein kinase 3 [Source:HGNC Symbol;Acc:HGNC:2676]	Diploid	Diploid
ENSG00000105677	TMEM147	transmembrane protein 147 [Source:HGNC Symbol;Acc:30414]	ENSMMUG00000000841	TMEM147	transmembrane protein 147 [Source:HGNC Symbol;Acc:HGNC:30414]	Diploid	Diploid
ENSG00000167393	PPP2R3B	protein phosphatase 2, regulatory subunit B'', beta [Source:HGNC Symbol;Acc:13417]	ENSMMUG00000005113	PPP2R3B	protein phosphatase 2 regulatory subunit B''beta [Source:HGNC Symbol;Acc:HGNC:13417]	Diploid	Diploid
ENSG00000125084	WNT1	wingless-type MMTV integration site family, member 1 [Source:HGNC Symbol;Acc:12774]	ENSMMUG00000015709	WNT1	Wnt family member 1 [Source:HGNC Symbol;Acc:HGNC:12774]	Diploid	Diploid
ENSG00000007541	PIGQ	phosphatidylinositol glycan anchor biosynthesis, class Q [Source:HGNC Symbol;Acc:14135]	ENSMMUG00000029296	PIGQ	phosphatidylinositol glycan anchor biosynthesis class Q [Source:HGNC Symbol;Acc:HGNC:14135]	Diploid	Diploid
ENSG00000068308	OTUD5	OTU domain containing 5 [Source:HGNC Symbol;Acc:25402]	ENSMMUG00000004558	OTUD5	OTU deubiquitinase 5 [Source:HGNC Symbol;Acc:HGNC:25402]	Diploid	Diploid
ENSG00000171446	KRT27	keratin 27 [Source:HGNC Symbol;Acc:30841]	ENSMMUG00000001497	KRT27	keratin 27 [Source:HGNC Symbol;Acc:HGNC:30841]	Diploid	Diploid
ENSG00000078018	MAP2	microtubule-associated protein 2 [Source:HGNC Symbol;Acc:6839]	ENSMMUG00000018741	MAP2	microtubule associated protein 2 [Source:HGNC Symbol;Acc:HGNC:6839]	Diploid	Diploid
ENSG00000154133	ROBO4	roundabout, axon guidance receptor, homolog 4 (Drosophila) [Source:HGNC Symbol;Acc:17985]	ENSMMUG00000021578	ROBO4	roundabout guidance receptor 4 [Source:HGNC Symbol;Acc:HGNC:17985]	Diploid	Diploid
ENSG00000102890	ELMO3	engulfment and cell motility 3 [Source:HGNC Symbol;Acc:17289]	ENSMMUG00000020259	ELMO3	engulfment and cell motility 3 [Source:HGNC Symbol;Acc:HGNC:17289]	Diploid	Diploid
ENSG00000204869	IGFL4	IGF-like family member 4 [Source:HGNC Symbol;Acc:32931]	ENSMMUG00000041352	IGFL4	IGF like family member 4 [Source:HGNC Symbol;Acc:HGNC:32931]	Diploid	Diploid
ENSG00000105127	AKAP8	A kinase (PRKA) anchor protein 8 [Source:HGNC Symbol;Acc:378]	ENSMMUG00000017984	AKAP8	A-kinase anchoring protein 8 [Source:HGNC Symbol;Acc:HGNC:378]	Diploid	Diploid
ENSG00000138080	EMILIN1	elastin microfibril interfacer 1 [Source:HGNC Symbol;Acc:19880]	ENSMMUG00000016046	EMILIN1	EMILIN-1 precursor [Source:RefSeq peptide;Acc:NP_001247837]	Diploid	Diploid
ENSG00000185960	SHOX	short stature homeobox [Source:HGNC Symbol;Acc:10853]	ENSMMUG00000004955	SHOX	short stature homeobox [Source:HGNC Symbol;Acc:HGNC:10853]	Diploid	Diploid
ENSG00000164050	PLXNB1	plexin B1 [Source:HGNC Symbol;Acc:9103]	ENSMMUG00000003074	PLXNB1	plexin B1 [Source:HGNC Symbol;Acc:HGNC:9103]	Diploid	Diploid
ENSG00000180573	HIST1H2AC	histone cluster 1, H2ac [Source:HGNC Symbol;Acc:4733]	ENSMMUG00000039700	HIST2H2AA3	histone cluster 1, H2ac [Source:HGNC Symbol;Acc:HGNC:4733]	Duplicated and fixed as a whole	Diploid
ENSG00000155959	VBP1	von Hippel-Lindau binding protein 1 [Source:HGNC Symbol;Acc:12662]	ENSMMUG00000015095	VBP1	VHL binding protein 1 [Source:HGNC Symbol;Acc:HGNC:12662]	Diploid	Diploid
ENSG00000083750	RRAGB	Ras-related GTP binding B [Source:HGNC Symbol;Acc:19901]	ENSMMUG00000017635	RRAGB	Ras related GTP binding B [Source:HGNC Symbol;Acc:HGNC:19901]	Diploid	Diploid
ENSG00000167491	GATAD2A	GATA zinc finger domain containing 2A [Source:HGNC Symbol;Acc:29989]	ENSMMUG00000003164	GATAD2A	GATA zinc finger domain containing 2A [Source:HGNC Symbol;Acc:HGNC:29989]	Diploid	Diploid
ENSG00000165929	TC2N	tandem C2 domains, nuclear [Source:HGNC Symbol;Acc:19859]	ENSMMUG00000011745	TC2N	tandem C2 domains, nuclear [Source:HGNC Symbol;Acc:HGNC:19859]	Diploid	Diploid
ENSG00000196372	ASB13	ankyrin repeat and SOCS box containing 13 [Source:HGNC Symbol;Acc:19765]	ENSMMUG00000001290	ASB13	ankyrin repeat and SOCS box containing 13 [Source:HGNC Symbol;Acc:HGNC:19765]	Diploid	Diploid
ENSG00000141905	NFIC	nuclear factor I/C (CCAAT-binding transcription factor) [Source:HGNC Symbol;Acc:7786]	ENSMMUG00000003439	NFIC	nuclear factor I C [Source:HGNC Symbol;Acc:HGNC:7786]	Diploid	Diploid
ENSG00000101901	ALG13	ALG13, UDP-N-acetylglucosaminyltransferase subunit [Source:HGNC Symbol;Acc:30881]	ENSMMUG00000010421	ALG13	ALG13, UDP-N-acetylglucosaminyltransferase subunit [Source:HGNC Symbol;Acc:HGNC:30881]	Diploid	Diploid
ENSG00000144227	NXPH2	neurexophilin 2 [Source:HGNC Symbol;Acc:8076]	ENSMMUG00000005176	NXPH2	neurexophilin 2 [Source:HGNC Symbol;Acc:HGNC:8076]	Diploid	Diploid
ENSG00000105492	SIGLEC6	sialic acid binding Ig-like lectin 6 [Source:HGNC Symbol;Acc:10875]	ENSMMUG00000012765	SIGLEC6	sialic acid binding Ig like lectin 6 [Source:HGNC Symbol;Acc:HGNC:10875]	Diploid	Diploid
ENSG00000182154	MRPL41	mitochondrial ribosomal protein L41 [Source:HGNC Symbol;Acc:14492]	ENSMMUG00000039736	MRPL41	mitochondrial ribosomal protein L41 [Source:HGNC Symbol;Acc:HGNC:14492]	Diploid	Diploid
ENSG00000128342	LIF	leukemia inhibitory factor [Source:HGNC Symbol;Acc:6596]	ENSMMUG00000048630	LIF	LIF, interleukin 6 family cytokine [Source:HGNC Symbol;Acc:HGNC:6596]	Diploid	Diploid
ENSG00000168539	CHRM1	cholinergic receptor, muscarinic 1 [Source:HGNC Symbol;Acc:1950]	ENSMMUG00000017292	CHRM1	cholinergic receptor muscarinic 1 [Source:HGNC Symbol;Acc:HGNC:1950]	Diploid	Diploid
ENSG00000203908	KHDC3L	KH domain containing 3-like, subcortical maternal complex member [Source:HGNC Symbol;Acc:33699]	ENSMMUG00000010084	KHDC3L	KH domain containing 3 like, subcortical maternal complex member [Source:HGNC Symbol;Acc:HGNC:33699]	Diploid	Diploid
ENSG00000188293	IGFL1	IGF-like family member 1 [Source:HGNC Symbol;Acc:24093]	ENSMMUG00000020229	IGFL1	IGF like family member 1 [Source:HGNC Symbol;Acc:HGNC:24093]	Diploid	Diploid
ENSG00000168936	TMEM129	transmembrane protein 129 [Source:HGNC Symbol;Acc:25137]	ENSMMUG00000039485	TMEM129	transmembrane protein 129 [Source:HGNC Symbol;Acc:HGNC:25137]	Diploid	Diploid
ENSG00000142528	ZNF473	zinc finger protein 473 [Source:HGNC Symbol;Acc:23239]	ENSMMUG00000010838	ZNF473	zinc finger protein 473 [Source:HGNC Symbol;Acc:HGNC:23239]	Diploid	Diploid
ENSG00000064115	TM7SF3	transmembrane 7 superfamily member 3 [Source:HGNC Symbol;Acc:23049]	ENSMMUG00000003217	TM7SF3	transmembrane 7 superfamily member 3 [Source:HGNC Symbol;Acc:HGNC:23049]	Diploid	Diploid
ENSG00000231389	HLA-DPA1	major histocompatibility complex, class II, DP alpha 1 [Source:HGNC Symbol;Acc:4938]	ENSMMUG00000019371	HLA-DPA1	major histocompatibility complex, class II, DP alpha 1 [Source:HGNC Symbol;Acc:HGNC:4938]	Diploid	Diploid
ENSG00000115267	IFIH1	interferon induced with helicase C domain 1 [Source:HGNC Symbol;Acc:18873]	ENSMMUG00000003202	IFIH1	interferon induced with helicase C domain 1 [Source:HGNC Symbol;Acc:HGNC:18873]	Diploid	Diploid
ENSG00000168813	ZNF507	zinc finger protein 507 [Source:HGNC Symbol;Acc:23783]	ENSMMUG00000010840	ZNF507	zinc finger protein 507 [Source:HGNC Symbol;Acc:HGNC:23783]	Diploid	Diploid
ENSG00000008282	SYPL1	synaptophysin-like 1 [Source:HGNC Symbol;Acc:11507]	ENSMMUG00000019593	SYPL1	synaptophysin like 1 [Source:HGNC Symbol;Acc:HGNC:11507]	Diploid	Diploid
ENSG00000145934	TENM2	teneurin transmembrane protein 2 [Source:HGNC Symbol;Acc:29943]	ENSMMUG00000009116	TENM2	teneurin transmembrane protein 2 [Source:HGNC Symbol;Acc:HGNC:29943]	Diploid	Diploid
ENSG00000257108	NHLRC4	NHL repeat containing 4 [Source:HGNC Symbol;Acc:26700]	ENSMMUG00000000616	NHLRC4	NHL repeat containing 4 [Source:HGNC Symbol;Acc:HGNC:26700]	Diploid	Diploid
ENSG00000080007	DDX43	DEAD (Asp-Glu-Ala-Asp) box polypeptide 43 [Source:HGNC Symbol;Acc:18677]	ENSMMUG00000019599	DDX43	DEAD-box helicase 43 [Source:HGNC Symbol;Acc:HGNC:18677]	Diploid	Diploid
ENSG00000102981	PARD6A	par-6 family cell polarity regulator alpha [Source:HGNC Symbol;Acc:15943]	ENSMMUG00000044865	PARD6A	partitioning defective 6 homolog alpha [Source:RefSeq peptide;Acc:NP_001253493]	Diploid	Diploid
ENSG00000165195	PIGA	phosphatidylinositol glycan anchor biosynthesis, class A [Source:HGNC Symbol;Acc:8957]	ENSMMUG00000015737	PIGA	phosphatidylinositol glycan anchor biosynthesis, class A [Source:RefSeq peptide;Acc:NP_001247532]	Diploid	Diploid
ENSG00000008086	CDKL5	cyclin-dependent kinase-like 5 [Source:HGNC Symbol;Acc:11411]	ENSMMUG00000005063	CDKL5	cyclin dependent kinase like 5 [Source:HGNC Symbol;Acc:HGNC:11411]	Diploid	Diploid
ENSG00000179314	WSCD1	WSC domain containing 1 [Source:HGNC Symbol;Acc:29060]	ENSMMUG00000010014	WSCD1	WSC domain containing 1 [Source:HGNC Symbol;Acc:HGNC:29060]	Diploid	Diploid
ENSG00000125848	FLRT3	fibronectin leucine rich transmembrane protein 3 [Source:HGNC Symbol;Acc:3762]	ENSMMUG00000002916	FLRT3	fibronectin leucine rich transmembrane protein 3 [Source:HGNC Symbol;Acc:HGNC:3762]	Diploid	Diploid
ENSG00000087365	SF3B2	splicing factor 3b, subunit 2, 145kDa [Source:HGNC Symbol;Acc:10769]	ENSMMUG00000011743	SF3B2	splicing factor 3b subunit 2 [Source:HGNC Symbol;Acc:HGNC:10769]	Diploid	Diploid
ENSG00000124733	MEA1	male-enhanced antigen 1 [Source:HGNC Symbol;Acc:6986]	ENSMMUG00000004871	MEA1	male-enhanced antigen 1 [Source:RefSeq peptide;Acc:NP_001181798]	Diploid	Diploid
ENSG00000115816	CEBPZ	CCAAT/enhancer binding protein (C/EBP), zeta [Source:HGNC Symbol;Acc:24218]	ENSMMUG00000016433	CEBPZ	CCAAT/enhancer binding protein zeta [Source:HGNC Symbol;Acc:HGNC:24218]	Diploid	Diploid
ENSG00000108878	CACNG1	calcium channel, voltage-dependent, gamma subunit 1 [Source:HGNC Symbol;Acc:1405]	ENSMMUG00000002958	CACNG1	calcium voltage-gated channel auxiliary subunit gamma 1 [Source:HGNC Symbol;Acc:HGNC:1405]	Diploid	Diploid
ENSG00000136147	PHF11	PHD finger protein 11 [Source:HGNC Symbol;Acc:17024]	ENSMMUG00000013476	PHF11	PHD finger protein 11 [Source:HGNC Symbol;Acc:HGNC:17024]	Diploid	Diploid
ENSG00000121410	A1BG	alpha-1-B glycoprotein [Source:HGNC Symbol;Acc:5]	ENSMMUG00000012459	A1BG	alpha-1-B glycoprotein [Source:HGNC Symbol;Acc:HGNC:5]	Diploid	Diploid
ENSG00000167548	KMT2D	lysine (K)-specific methyltransferase 2D [Source:HGNC Symbol;Acc:7133]	ENSMMUG00000015718	KMT2D	lysine methyltransferase 2D [Source:HGNC Symbol;Acc:HGNC:7133]	Diploid	Diploid
ENSG00000112640	PPP2R5D	protein phosphatase 2, regulatory subunit B', delta [Source:HGNC Symbol;Acc:9312]	ENSMMUG00000004873	PPP2R5D	protein phosphatase 2 regulatory subunit B'delta [Source:HGNC Symbol;Acc:HGNC:9312]	Diploid	Diploid
ENSG00000169550	MUC15	mucin 15, cell surface associated [Source:HGNC Symbol;Acc:14956]	ENSMMUG00000012926	MUC15	mucin 15, cell surface associated [Source:HGNC Symbol;Acc:HGNC:14956]	Diploid	Diploid
ENSG00000178919	FOXE1	forkhead box E1 (thyroid transcription factor 2) [Source:HGNC Symbol;Acc:3806]	ENSMMUG00000002584	FOXE1	forkhead box E1 [Source:HGNC Symbol;Acc:HGNC:3806]	Diploid	Diploid
ENSG00000173908	KRT28	keratin 28 [Source:HGNC Symbol;Acc:30842]	ENSMMUG00000001499	KRT28	keratin 28 [Source:HGNC Symbol;Acc:HGNC:30842]	Diploid	Diploid
ENSG00000053501	USE1	unconventional SNARE in the ER 1 homolog (S. cerevisiae) [Source:HGNC Symbol;Acc:30882]	ENSMMUG00000011589	USE1	unconventional SNARE in the ER 1 [Source:HGNC Symbol;Acc:HGNC:30882]	Diploid	Diploid
ENSG00000197901	SLC22A6	solute carrier family 22 (organic anion transporter), member 6 [Source:HGNC Symbol;Acc:10970]	ENSMMUG00000016227	SLC22A6	solute carrier family 22 member 6 [Source:HGNC Symbol;Acc:HGNC:10970]	Diploid	Diploid
ENSG00000180773	SLC36A4	solute carrier family 36 (proton/amino acid symporter), member 4 [Source:HGNC Symbol;Acc:19660]	ENSMMUG00000017741	SLC36A4	solute carrier family 36 member 4 [Source:HGNC Symbol;Acc:HGNC:19660]	Diploid	Diploid
ENSG00000136872	ALDOB	aldolase B, fructose-bisphosphate [Source:HGNC Symbol;Acc:417]	ENSMMUG00000023796	ALDOB	aldolase, fructose-bisphosphate B [Source:HGNC Symbol;Acc:HGNC:417]	Diploid	Diploid
ENSG00000140961	OSGIN1	oxidative stress induced growth inhibitor 1 [Source:HGNC Symbol;Acc:30093]	ENSMMUG00000014219	OSGIN1	oxidative stress induced growth inhibitor 1 [Source:HGNC Symbol;Acc:HGNC:30093]	Diploid	Diploid
ENSG00000102225	CDK16	cyclin-dependent kinase 16 [Source:HGNC Symbol;Acc:8749]	ENSMMUG00000014002	CDK16	cyclin dependent kinase 16 [Source:HGNC Symbol;Acc:HGNC:8749]	Diploid	Diploid
ENSG00000099985	OSM	oncostatin M [Source:HGNC Symbol;Acc:8506]	ENSMMUG00000005545	OSM	oncostatin-M precursor [Source:RefSeq peptide;Acc:NP_001181403]	Diploid	Diploid
ENSG00000113161	HMGCR	3-hydroxy-3-methylglutaryl-CoA reductase [Source:HGNC Symbol;Acc:5006]	ENSMMUG00000006139	HMGCR	3-hydroxy-3-methylglutaryl-CoA reductase [Source:HGNC Symbol;Acc:HGNC:5006]	Diploid	Diploid
ENSG00000175879	HOXD8	homeobox D8 [Source:HGNC Symbol;Acc:5139]	ENSMMUG00000023504	HOXD8	homeobox D8 [Source:HGNC Symbol;Acc:HGNC:5139]	Diploid	Diploid
ENSG00000003509	NDUFAF7	NADH dehydrogenase (ubiquinone) complex I, assembly factor 7 [Source:HGNC Symbol;Acc:28816]	ENSMMUG00000016434	NDUFAF7	NADH:ubiquinone oxidoreductase complex assembly factor 7 [Source:HGNC Symbol;Acc:HGNC:28816]	Diploid	Diploid
ENSG00000166603	MC4R	melanocortin 4 receptor [Source:HGNC Symbol;Acc:6932]	ENSMMUG00000017258	MC4R	melanocortin 4 receptor [Source:HGNC Symbol;Acc:HGNC:6932]	Diploid	Diploid
ENSG00000244187	TMEM141	transmembrane protein 141 [Source:HGNC Symbol;Acc:28211]	ENSMMUG00000048231	TMEM141	transmembrane protein 141 [Source:HGNC Symbol;Acc:HGNC:28211]	Diploid	Diploid
ENSG00000174498	IGDCC3	immunoglobulin superfamily, DCC subclass, member 3 [Source:HGNC Symbol;Acc:9700]	ENSMMUG00000021783	IGDCC3	immunoglobulin superfamily DCC subclass member 3 [Source:HGNC Symbol;Acc:HGNC:9700]	Diploid	Diploid
ENSG00000095981	KCNK16	potassium channel, subfamily K, member 16 [Source:HGNC Symbol;Acc:14464]	ENSMMUG00000013648	KCNK16	potassium two pore domain channel subfamily K member 16 [Source:HGNC Symbol;Acc:HGNC:14464]	Diploid	Diploid
ENSG00000013810	TACC3	transforming, acidic coiled-coil containing protein 3 [Source:HGNC Symbol;Acc:11524]	ENSMMUG00000011191	TACC3	transforming acidic coiled-coil containing protein 3 [Source:HGNC Symbol;Acc:HGNC:11524]	Diploid	Diploid
ENSG00000123572	NRK	Nik related kinase [Source:HGNC Symbol;Acc:25391]	ENSMMUG00000011601	NRK	Nik related kinase [Source:HGNC Symbol;Acc:HGNC:25391]	Diploid	Diploid
ENSG00000122591	FAM126A	family with sequence similarity 126, member A [Source:HGNC Symbol;Acc:24587]	ENSMMUG00000000517	FAM126A	hyccin [Source:RefSeq peptide;Acc:NP_001253085]	Diploid	Diploid
ENSG00000102104	RS1	retinoschisin 1 [Source:HGNC Symbol;Acc:10457]	ENSMMUG00000005065	RS1	retinoschisin 1 [Source:HGNC Symbol;Acc:HGNC:10457]	Diploid	Diploid
ENSG00000134817	APLNR	apelin receptor [Source:HGNC Symbol;Acc:339]	ENSMMUG00000010627	APLNR	apelin receptor [Source:HGNC Symbol;Acc:HGNC:339]	Diploid	Diploid
ENSG00000165443	PHYHIPL	phytanoyl-CoA 2-hydroxylase interacting protein-like [Source:HGNC Symbol;Acc:29378]	ENSMMUG00000003705	PHYHIPL	phytanoyl-CoA 2-hydroxylase interacting protein like [Source:HGNC Symbol;Acc:HGNC:29378]	Diploid	Diploid
ENSG00000124787	RPP40	ribonuclease P/MRP 40kDa subunit [Source:HGNC Symbol;Acc:20992]	ENSMMUG00000004966	RPP40	ribonuclease P/MRP subunit p40 [Source:HGNC Symbol;Acc:HGNC:20992]	Diploid	Diploid
ENSG00000151704	KCNJ1	potassium inwardly-rectifying channel, subfamily J, member 1 [Source:HGNC Symbol;Acc:6255]	ENSMMUG00000003144	KCNJ1	potassium voltage-gated channel subfamily J member 1 [Source:HGNC Symbol;Acc:HGNC:6255]	Diploid	Diploid
ENSG00000157540	DYRK1A	dual-specificity tyrosine-(Y)-phosphorylation regulated kinase 1A [Source:HGNC Symbol;Acc:3091]	ENSMMUG00000018131	DYRK1A	dual specificity tyrosine-phosphorylation-regulated kinase 1A [Source:RefSeq peptide;Acc:NP_001245072]	Diploid	Diploid
ENSG00000107165	TYRP1	tyrosinase-related protein 1 [Source:HGNC Symbol;Acc:12450]	ENSMMUG00000013288			Diploid	Diploid
ENSG00000154277	UCHL1	ubiquitin carboxyl-terminal esterase L1 (ubiquitin thiolesterase) [Source:HGNC Symbol;Acc:12513]	ENSMMUG00000013071	UCHL1	ubiquitin C-terminal hydrolase L1 [Source:HGNC Symbol;Acc:HGNC:12513]	Diploid	Diploid
ENSG00000128709	HOXD9	homeobox D9 [Source:HGNC Symbol;Acc:5140]	ENSMMUG00000032599	HOXD9	homeobox D9 [Source:HGNC Symbol;Acc:HGNC:5140]	Diploid	Diploid
ENSG00000153714	LURAP1L	leucine rich adaptor protein 1-like [Source:HGNC Symbol;Acc:31452]	ENSMMUG00000013290	LURAP1L	leucine rich adaptor protein 1 like [Source:HGNC Symbol;Acc:HGNC:31452]	Diploid	Diploid
ENSG00000155304	HSPA13	heat shock protein 70kDa family, member 13 [Source:HGNC Symbol;Acc:11375]	ENSMMUG00000020091	HSPA13	heat shock 70 kDa protein 13 precursor [Source:RefSeq peptide;Acc:NP_001180637]	Diploid	Diploid
ENSG00000160282	FTCD	formimidoyltransferase cyclodeaminase [Source:HGNC Symbol;Acc:3974]	ENSMMUG00000022324	FTCD	formimidoyltransferase cyclodeaminase [Source:HGNC Symbol;Acc:HGNC:3974]	Diploid	Diploid
ENSG00000105290	APLP1	amyloid beta (A4) precursor-like protein 1 [Source:HGNC Symbol;Acc:597]	ENSMMUG00000019753	APLP1	amyloid beta precursor like protein 1 [Source:HGNC Symbol;Acc:HGNC:597]	Diploid	Diploid
ENSG00000115825	PRKD3	protein kinase D3 [Source:HGNC Symbol;Acc:9408]	ENSMMUG00000016438	PRKD3	protein kinase D3 [Source:HGNC Symbol;Acc:HGNC:9408]	Diploid	Diploid
ENSG00000122691	TWIST1	twist family bHLH transcription factor 1 [Source:HGNC Symbol;Acc:12428]	ENSMMUG00000011173	TWIST1	twist family bHLH transcription factor 1 [Source:HGNC Symbol;Acc:HGNC:12428]	Diploid	Diploid
ENSG00000182584	ACTL10	actin-like 10 [Source:HGNC Symbol;Acc:16127]	ENSMMUG00000023549	ACTL10	actin like 10 [Source:HGNC Symbol;Acc:HGNC:16127]	Diploid	Diploid
ENSG00000213213	CCDC183	coiled-coil domain containing 183 [Source:HGNC Symbol;Acc:28236]	ENSMMUG00000005040	CCDC183	coiled-coil domain containing 183 [Source:HGNC Symbol;Acc:HGNC:28236]	Diploid	Diploid
ENSG00000125967	NECAB3	N-terminal EF-hand calcium binding protein 3 [Source:HGNC Symbol;Acc:15851]	ENSMMUG00000023543	NECAB3	N-terminal EF-hand calcium binding protein 3 [Source:HGNC Symbol;Acc:HGNC:15851]	Diploid	Diploid
ENSG00000149115	TNKS1BP1	tankyrase 1 binding protein 1, 182kDa [Source:HGNC Symbol;Acc:19081]	ENSMMUG00000017809	TNKS1BP1	tankyrase 1 binding protein 1 [Source:HGNC Symbol;Acc:HGNC:19081]	Diploid	Diploid
ENSG00000074356	C17orf85	chromosome 17 open reading frame 85 [Source:HGNC Symbol;Acc:24612]	ENSMMUG00000008556	C17orf85	nuclear cap binding subunit 3 [Source:HGNC Symbol;Acc:HGNC:24612]	Diploid	Diploid
ENSG00000187325	TAF9B	TAF9B RNA polymerase II, TATA box binding protein (TBP)-associated factor, 31kDa [Source:HGNC Symbol;Acc:17306]	ENSMMUG00000012875	TAF9B	TATA-box binding protein associated factor 9b [Source:HGNC Symbol;Acc:HGNC:17306]	Diploid	Diploid
ENSG00000120457	KCNJ5	potassium inwardly-rectifying channel, subfamily J, member 5 [Source:HGNC Symbol;Acc:6266]	ENSMMUG00000003145	KCNJ5	potassium voltage-gated channel subfamily J member 5 [Source:HGNC Symbol;Acc:HGNC:6266]	Diploid	Diploid
ENSG00000134755	DSC2	desmocollin 2 [Source:HGNC Symbol;Acc:3036]	ENSMMUG00000011687	DSC2	desmocollin 2 [Source:HGNC Symbol;Acc:HGNC:3036]	Diploid	Diploid
ENSG00000129757	CDKN1C	cyclin-dependent kinase inhibitor 1C (p57, Kip2) [Source:HGNC Symbol;Acc:1786]	ENSMMUG00000037980	CDKN1C	cyclin dependent kinase inhibitor 1C [Source:HGNC Symbol;Acc:HGNC:1786]	Diploid	Diploid
ENSG00000155961	RAB39B	RAB39B, member RAS oncogene family [Source:HGNC Symbol;Acc:16499]	ENSMMUG00000015096	RAB39B	RAB39B, member RAS oncogene family [Source:HGNC Symbol;Acc:HGNC:16499]	Diploid	Diploid
ENSG00000124827	GCM2	glial cells missing homolog 2 (Drosophila) [Source:HGNC Symbol;Acc:4198]	ENSMMUG00000007719	GCM2	glial cells missing homolog 2 [Source:HGNC Symbol;Acc:HGNC:4198]	Diploid	Diploid
ENSG00000079805	DNM2	dynamin 2 [Source:HGNC Symbol;Acc:2974]	ENSMMUG00000014677	DNM2	dynamin-2 [Source:RefSeq peptide;Acc:NP_001252641]	Diploid	Diploid
ENSG00000155962	CLIC2	chloride intracellular channel 2 [Source:HGNC Symbol;Acc:2063]	ENSMMUG00000009482	CLIC2	chloride intracellular channel 2 [Source:HGNC Symbol;Acc:HGNC:2063]	Diploid	Diploid
ENSG00000087510	TFAP2C	transcription factor AP-2 gamma (activating enhancer binding protein 2 gamma) [Source:HGNC Symbol;Acc:11744]	ENSMMUG00000009364	TFAP2C	transcription factor AP-2 gamma [Source:HGNC Symbol;Acc:HGNC:11744]	Diploid	Diploid
ENSG00000260314	MRC1	mannose receptor, C type 1 [Source:HGNC Symbol;Acc:7228]	ENSMMUG00000011620	MRC1	mannose receptor C-type 1 [Source:HGNC Symbol;Acc:HGNC:7228]	Diploid	Diploid
ENSG00000132740	IGHMBP2	immunoglobulin mu binding protein 2 [Source:HGNC Symbol;Acc:5542]	ENSMMUG00000010128			Diploid	Diploid
ENSG00000173442	EHBP1L1	EH domain binding protein 1-like 1 [Source:HGNC Symbol;Acc:30682]	ENSMMUG00000014169	EHBP1L1	EH domain binding protein 1 like 1 [Source:HGNC Symbol;Acc:HGNC:30682]	Diploid	Diploid
ENSG00000198265	HELZ	helicase with zinc finger [Source:HGNC Symbol;Acc:16878]	ENSMMUG00000002959	HELZ	helicase with zinc finger [Source:HGNC Symbol;Acc:HGNC:16878]	Diploid	Diploid
ENSG00000170525	PFKFB3	6-phosphofructo-2-kinase/fructose-2,6-biphosphatase 3 [Source:HGNC Symbol;Acc:8874]	ENSMMUG00000010596	PFKFB3	6-phosphofructo-2-kinase/fructose-2,6-biphosphatase 3 [Source:HGNC Symbol;Acc:HGNC:8874]	Diploid	Diploid
ENSG00000102349	KLF8	Kruppel-like factor 8 [Source:HGNC Symbol;Acc:6351]	ENSMMUG00000014678	KLF8	Kruppel like factor 8 [Source:HGNC Symbol;Acc:HGNC:6351]	Diploid	Diploid
ENSG00000134765	DSC1	desmocollin 1 [Source:HGNC Symbol;Acc:3035]	ENSMMUG00000011690	DSC1	desmocollin 1 [Source:HGNC Symbol;Acc:HGNC:3035]	Diploid	Diploid
ENSG00000124702	KLHDC3	kelch domain containing 3 [Source:HGNC Symbol;Acc:20704]	ENSMMUG00000000766	KLHDC3	kelch domain containing 3 [Source:HGNC Symbol;Acc:HGNC:20704]	Diploid	Diploid
ENSG00000060971	ACAA1	acetyl-CoA acyltransferase 1 [Source:HGNC Symbol;Acc:82]	ENSMMUG00000000990	ACAA1	acetyl-CoA acyltransferase 1 [Source:HGNC Symbol;Acc:HGNC:82]	Diploid	Diploid
ENSG00000070010	UFD1L	ubiquitin fusion degradation 1 like (yeast) [Source:HGNC Symbol;Acc:12520]	ENSMMUG00000031106	UFD1	ubiquitin recognition factor in ER associated degradation 1 [Source:HGNC Symbol;Acc:HGNC:12520]	Diploid	Diploid
ENSG00000128346	C22orf23	chromosome 22 open reading frame 23 [Source:HGNC Symbol;Acc:18589]	ENSMMUG00000021560	C22orf23	chromosome 22 open reading frame 23 [Source:HGNC Symbol;Acc:HGNC:18589]	Diploid	Diploid
ENSG00000101542	CDH20	cadherin 20, type 2 [Source:HGNC Symbol;Acc:1760]	ENSMMUG00000001713	CDH20	cadherin 20 [Source:HGNC Symbol;Acc:HGNC:1760]	Diploid	Diploid
ENSG00000115295	CLIP4	CAP-GLY domain containing linker protein family, member 4 [Source:HGNC Symbol;Acc:26108]	ENSMMUG00000010259	CLIP4	CAP-Gly domain containing linker protein family member 4 [Source:HGNC Symbol;Acc:HGNC:26108]	Diploid	Diploid
ENSG00000183778	B3GALT5	UDP-Gal:betaGlcNAc beta 1,3-galactosyltransferase, polypeptide 5 [Source:HGNC Symbol;Acc:920]	ENSMMUG00000003428	B3GALT5	beta-1,3-galactosyltransferase 5 [Source:HGNC Symbol;Acc:HGNC:920]	Diploid	Diploid
ENSG00000196911	KPNA5	karyopherin alpha 5 (importin alpha 6) [Source:HGNC Symbol;Acc:6398]	ENSMMUG00000048955	KPNA5	karyopherin subunit alpha 5 [Source:HGNC Symbol;Acc:HGNC:6398]	Diploid	Diploid
ENSG00000120318	ARAP3	ArfGAP with RhoGAP domain, ankyrin repeat and PH domain 3 [Source:HGNC Symbol;Acc:24097]	ENSMMUG00000000465	ARAP3	ArfGAP with RhoGAP domain, ankyrin repeat and PH domain 3 [Source:HGNC Symbol;Acc:HGNC:24097]	Diploid	Diploid
ENSG00000174672	BRSK2	BR serine/threonine kinase 2 [Source:HGNC Symbol;Acc:11405]	ENSMMUG00000011211	BRSK2	BR serine/threonine kinase 2 [Source:HGNC Symbol;Acc:HGNC:11405]	Diploid	Diploid
ENSG00000164627	KIF6	kinesin family member 6 [Source:HGNC Symbol;Acc:21202]	ENSMMUG00000013651	KIF6	kinesin family member 6 [Source:HGNC Symbol;Acc:HGNC:21202]	Diploid	Diploid
ENSG00000096654	ZNF184	zinc finger protein 184 [Source:HGNC Symbol;Acc:12975]	ENSMMUG00000008060	ZNF184	zinc finger protein 184 [Source:HGNC Symbol;Acc:HGNC:12975]	Diploid	Diploid
ENSG00000125122	LRRC29	leucine rich repeat containing 29 [Source:HGNC Symbol;Acc:13605]	ENSMMUG00000020260	LRRC29	leucine rich repeat containing 29 [Source:HGNC Symbol;Acc:HGNC:13605]	Diploid	Diploid
ENSG00000165621	OXGR1	oxoglutarate (alpha-ketoglutarate) receptor 1 [Source:HGNC Symbol;Acc:4531]	ENSMMUG00000008701	OXGR1	oxoglutarate receptor 1 [Source:HGNC Symbol;Acc:HGNC:4531]	Diploid	Diploid
ENSG00000172878	METAP1D	methionyl aminopeptidase type 1D (mitochondrial) [Source:HGNC Symbol;Acc:32583]	ENSMMUG00000007314	MAP1D	methionyl aminopeptidase type 1D (mitochondrial) [Source:HGNC Symbol;Acc:HGNC:32583]	Diploid	Diploid
ENSG00000164187	LMBRD2	LMBR1 domain containing 2 [Source:HGNC Symbol;Acc:25287]	ENSMMUG00000015223	LMBRD2	LMBR1 domain containing 2 [Source:HGNC Symbol;Acc:HGNC:25287]	Diploid	Diploid
ENSG00000136146	MED4	mediator complex subunit 4 [Source:HGNC Symbol;Acc:17903]	ENSMMUG00000017988	MED4	mediator complex subunit 4 [Source:HGNC Symbol;Acc:HGNC:17903]	Diploid	Diploid
ENSG00000171700	RGS19	regulator of G-protein signaling 19 [Source:HGNC Symbol;Acc:13735]	ENSMMUG00000045901	RGS19	regulator of G-protein signaling 19 [Source:HGNC Symbol;Acc:HGNC:13735]	Diploid	Diploid
ENSG00000090905	TNRC6A	trinucleotide repeat containing 6A [Source:HGNC Symbol;Acc:11969]	ENSMMUG00000020428	TNRC6A	trinucleotide repeat containing 6A [Source:HGNC Symbol;Acc:HGNC:11969]	Diploid	Diploid
ENSG00000099203	TMED1	transmembrane emp24 protein transport domain containing 1 [Source:HGNC Symbol;Acc:17291]	ENSMMUG00000012041	TMED1	transmembrane p24 trafficking protein 1 [Source:HGNC Symbol;Acc:HGNC:17291]	Diploid	Diploid
ENSG00000178522	AMBN	ameloblastin (enamel matrix protein) [Source:HGNC Symbol;Acc:452]	ENSMMUG00000022099	AMBN	ameloblastin [Source:HGNC Symbol;Acc:HGNC:452]	Diploid	Diploid
ENSG00000186395	KRT10	keratin 10 [Source:HGNC Symbol;Acc:6413]	ENSMMUG00000001500	KRT10	keratin 10 [Source:HGNC Symbol;Acc:HGNC:6413]	Diploid	Diploid
ENSG00000196367	TRRAP	transformation/transcription domain-associated protein [Source:HGNC Symbol;Acc:12347]	ENSMMUG00000023318	TRRAP	transformation/transcription domain associated protein [Source:HGNC Symbol;Acc:HGNC:12347]	Diploid	Diploid
ENSG00000149609	C20orf144	chromosome 20 open reading frame 144 [Source:HGNC Symbol;Acc:16137]	ENSMMUG00000023548	C20orf144	chromosome 20 open reading frame 144 [Source:HGNC Symbol;Acc:HGNC:16137]	Diploid	Diploid
ENSG00000124074	ENKD1	enkurin domain containing 1 [Source:HGNC Symbol;Acc:25246]	ENSMMUG00000009808	ENKD1	enkurin domain containing 1 [Source:HGNC Symbol;Acc:HGNC:25246]	Diploid	Diploid
ENSG00000242259	C22orf39	chromosome 22 open reading frame 39 [Source:HGNC Symbol;Acc:27012]	ENSMMUG00000044346	C22orf39	chromosome 22 open reading frame 39 [Source:HGNC Symbol;Acc:HGNC:27012]	Diploid	Diploid
ENSG00000113594	LIFR	leukemia inhibitory factor receptor alpha [Source:HGNC Symbol;Acc:6597]	ENSMMUG00000007386	LIFR	LIF receptor alpha [Source:HGNC Symbol;Acc:HGNC:6597]	Diploid	Diploid
ENSG00000132424	PNISR	PNN-interacting serine/arginine-rich protein [Source:HGNC Symbol;Acc:21222]	ENSMMUG00000005925	PNISR	PNN interacting serine and arginine rich protein [Source:HGNC Symbol;Acc:HGNC:21222]	Diploid	Diploid
ENSG00000166432	ZMAT1	zinc finger, matrin-type 1 [Source:HGNC Symbol;Acc:29377]	ENSMMUG00000002151	ZMAT1	zinc finger matrin-type 1 [Source:HGNC Symbol;Acc:HGNC:29377]	Diploid	Diploid
ENSG00000184730	APOBR	apolipoprotein B receptor [Source:HGNC Symbol;Acc:24087]	ENSMMUG00000000707	APOBR	apolipoprotein B receptor [Source:HGNC Symbol;Acc:HGNC:24087]	Diploid	Diploid
ENSG00000168234	TTC39C	tetratricopeptide repeat domain 39C [Source:HGNC Symbol;Acc:26595]	ENSMMUG00000004343	TTC39C	tetratricopeptide repeat domain 39C [Source:HGNC Symbol;Acc:HGNC:26595]	Diploid	Diploid
ENSG00000158545	ZC3H18	zinc finger CCCH-type containing 18 [Source:HGNC Symbol;Acc:25091]	ENSMMUG00000014323	ZC3H18	zinc finger CCCH-type containing 18 [Source:HGNC Symbol;Acc:HGNC:25091]	Diploid	Diploid
ENSG00000159761	C16orf86	chromosome 16 open reading frame 86 [Source:HGNC Symbol;Acc:33755]	ENSMMUG00000043912	C16orf86	chromosome 16 open reading frame 86 [Source:HGNC Symbol;Acc:HGNC:33755]	Diploid	Diploid
ENSG00000123561	SERPINA7	serpin peptidase inhibitor, clade A (alpha-1 antiproteinase, antitrypsin), member 7 [Source:HGNC Symbol;Acc:11583]	ENSMMUG00000003266	SERPINA7	serpin family A member 7 [Source:HGNC Symbol;Acc:HGNC:11583]	Diploid	Diploid
ENSG00000139112	GABARAPL1	GABA(A) receptor-associated protein like 1 [Source:HGNC Symbol;Acc:4068]	ENSMMUG00000002197	GABARAPL1	GABA type A receptor associated protein like 1 [Source:HGNC Symbol;Acc:HGNC:4068]	Diploid	Diploid
ENSG00000105497	ZNF175	zinc finger protein 175 [Source:HGNC Symbol;Acc:12964]	ENSMMUG00000012764	ZNF175	zinc finger protein 175 [Source:HGNC Symbol;Acc:HGNC:12964]	Diploid	Diploid
ENSG00000125975	C20orf173	chromosome 20 open reading frame 173 [Source:HGNC Symbol;Acc:16166]	ENSMMUG00000007344	C20orf173	chromosome 20 open reading frame 173 [Source:HGNC Symbol;Acc:HGNC:16166]	Diploid	Diploid
ENSG00000197361	FBXL22	F-box and leucine-rich repeat protein 22 [Source:HGNC Symbol;Acc:27537]	ENSMMUG00000012116	FBXL22	F-box and leucine rich repeat protein 22 [Source:HGNC Symbol;Acc:HGNC:27537]	Diploid	Diploid
ENSG00000155827	RNF20	ring finger protein 20, E3 ubiquitin protein ligase [Source:HGNC Symbol;Acc:10062]	ENSMMUG00000016670	RNF20	ring finger protein 20 [Source:HGNC Symbol;Acc:HGNC:10062]	Diploid	Diploid
ENSG00000106785	TRIM14	tripartite motif containing 14 [Source:HGNC Symbol;Acc:16283]	ENSMMUG00000001773	TRIM14	tripartite motif containing 14 [Source:HGNC Symbol;Acc:HGNC:16283]	Diploid	Diploid
ENSG00000164086	DUSP7	dual specificity phosphatase 7 [Source:HGNC Symbol;Acc:3073]	ENSMMUG00000005300	DUSP7	dual specificity phosphatase 7 [Source:HGNC Symbol;Acc:HGNC:3073]	Diploid	Diploid
ENSG00000112541	PDE10A	phosphodiesterase 10A [Source:HGNC Symbol;Acc:8772]	ENSMMUG00000023614	PDE10A	phosphodiesterase 10A [Source:HGNC Symbol;Acc:HGNC:8772]	Diploid	Diploid
ENSG00000140455	USP3	ubiquitin specific peptidase 3 [Source:HGNC Symbol;Acc:12626]	ENSMMUG00000012114	USP3	ubiquitin specific peptidase 3 [Source:HGNC Symbol;Acc:HGNC:12626]	Diploid	Diploid
ENSG00000198783	ZNF830	zinc finger protein 830 [Source:HGNC Symbol;Acc:28291]	ENSMMUG00000006402	ZNF830	zinc finger protein 830 [Source:HGNC Symbol;Acc:HGNC:28291]	Diploid	Diploid
ENSG00000185973	TMLHE	trimethyllysine hydroxylase, epsilon [Source:HGNC Symbol;Acc:18308]	ENSMMUG00000009481	TMLHE	trimethyllysine hydroxylase, epsilon [Source:HGNC Symbol;Acc:HGNC:18308]	Diploid	Diploid
ENSG00000172247	C1QTNF4	C1q and tumor necrosis factor related protein 4 [Source:HGNC Symbol;Acc:14346]	ENSMMUG00000004294	C1QTNF4	C1q and TNF related 4 [Source:HGNC Symbol;Acc:HGNC:14346]	Diploid	Diploid
ENSG00000004660	CAMKK1	calcium/calmodulin-dependent protein kinase kinase 1, alpha [Source:HGNC Symbol;Acc:1469]	ENSMMUG00000020251	CAMKK1	calcium/calmodulin dependent protein kinase kinase 1 [Source:HGNC Symbol;Acc:HGNC:1469]	Diploid	Diploid
ENSG00000183067	IGSF5	immunoglobulin superfamily, member 5 [Source:HGNC Symbol;Acc:5952]	ENSMMUG00000003427	IGSF5	immunoglobulin superfamily member 5 [Source:HGNC Symbol;Acc:HGNC:5952]	Diploid	Diploid
ENSG00000103154	NECAB2	N-terminal EF-hand calcium binding protein 2 [Source:HGNC Symbol;Acc:23746]	ENSMMUG00000029071	NECAB2	N-terminal EF-hand calcium binding protein 2 [Source:HGNC Symbol;Acc:HGNC:23746]	Diploid	Diploid
ENSG00000107821	KAZALD1	Kazal-type serine peptidase inhibitor domain 1 [Source:HGNC Symbol;Acc:25460]	ENSMMUG00000017668	KAZALD1	Kazal type serine peptidase inhibitor domain 1 [Source:HGNC Symbol;Acc:HGNC:25460]	Diploid	Diploid
ENSG00000005302	MSL3	male-specific lethal 3 homolog (Drosophila) [Source:HGNC Symbol;Acc:7370]	ENSMMUG00000002689	MSL3	male-specific lethal 3 homolog (Drosophila) [Source:HGNC Symbol;Acc:HGNC:7370]	Diploid	Diploid
ENSG00000108852	MPP2	membrane protein, palmitoylated 2 (MAGUK p55 subfamily member 2) [Source:HGNC Symbol;Acc:7220]	ENSMMUG00000032617	MPP2	membrane palmitoylated protein 2 [Source:HGNC Symbol;Acc:HGNC:7220]	Diploid	Diploid
ENSG00000188895	MSL1	male-specific lethal 1 homolog (Drosophila) [Source:HGNC Symbol;Acc:27905]	ENSMMUG00000022315	MSL1	male specific lethal 1 homolog [Source:HGNC Symbol;Acc:HGNC:27905]	Diploid	Diploid
ENSG00000148334	PTGES2	prostaglandin E synthase 2 [Source:HGNC Symbol;Acc:17822]	ENSMMUG00000018258	PTGES2	prostaglandin E synthase 2 [Source:HGNC Symbol;Acc:HGNC:17822]	Diploid	Diploid
ENSG00000123136	DDX39A	DEAD (Asp-Glu-Ala-Asp) box polypeptide 39A [Source:HGNC Symbol;Acc:17821]	ENSMMUG00000005723	DDX39A	DExD-box helicase 39A [Source:HGNC Symbol;Acc:HGNC:17821]	Diploid	Diploid
ENSG00000165678	GHITM	growth hormone inducible transmembrane protein [Source:HGNC Symbol;Acc:17281]	ENSMMUG00000018572	GHITM	growth hormone inducible transmembrane protein [Source:HGNC Symbol;Acc:HGNC:17281]	Diploid	Diploid
ENSG00000110628	SLC22A18	solute carrier family 22, member 18 [Source:HGNC Symbol;Acc:10964]	ENSMMUG00000007751	SLC22A18	solute carrier family 22 member 18 [Source:HGNC Symbol;Acc:HGNC:10964]	Diploid	Diploid
ENSG00000132464	ENAM	enamelin [Source:HGNC Symbol;Acc:3344]	ENSMMUG00000022102	ENAM	enamelin [Source:HGNC Symbol;Acc:HGNC:3344]	Diploid	Diploid
ENSG00000198467	TPM2	tropomyosin 2 (beta) [Source:HGNC Symbol;Acc:12011]	ENSMMUG00000016321			Diploid	Diploid
ENSG00000141194	OR4D1	olfactory receptor, family 4, subfamily D, member 1 [Source:HGNC Symbol;Acc:8293]	ENSMMUG00000011975	OR4D1	olfactory receptor family 4 subfamily D member 1 [Source:HGNC Symbol;Acc:HGNC:8293]	Diploid	Diploid
ENSG00000100867	DHRS2	dehydrogenase/reductase (SDR family) member 2 [Source:HGNC Symbol;Acc:18349]	ENSMMUG00000021849	DHRS2	dehydrogenase/reductase 2 [Source:HGNC Symbol;Acc:HGNC:18349]	Diploid	Diploid
ENSG00000132465	IGJ	immunoglobulin J polypeptide, linker protein for immunoglobulin alpha and mu polypeptides [Source:HGNC Symbol;Acc:5713]	ENSMMUG00000039537	JCHAIN	joining chain of multimeric IgA and IgM [Source:HGNC Symbol;Acc:HGNC:5713]	Diploid	Diploid
ENSG00000105245	NUMBL	numb homolog (Drosophila)-like [Source:HGNC Symbol;Acc:8061]	ENSMMUG00000004227	NUMBL	NUMB like, endocytic adaptor protein [Source:HGNC Symbol;Acc:HGNC:8061]	Diploid	Diploid
ENSG00000146216	TTBK1	tau tubulin kinase 1 [Source:HGNC Symbol;Acc:19140]	ENSMMUG00000017322	TTBK1	tau tubulin kinase 1 [Source:HGNC Symbol;Acc:HGNC:19140]	Diploid	Diploid
ENSG00000153093	ACOXL	acyl-CoA oxidase-like [Source:HGNC Symbol;Acc:25621]	ENSMMUG00000018421			Diploid	Diploid
ENSG00000163006	CCDC138	coiled-coil domain containing 138 [Source:HGNC Symbol;Acc:26531]	ENSMMUG00000021024	CCDC138	coiled-coil domain containing 138 [Source:HGNC Symbol;Acc:HGNC:26531]	Diploid	Diploid
ENSG00000164087	POC1A	POC1 centriolar protein A [Source:HGNC Symbol;Acc:24488]	ENSMMUG00000012485	POC1A	POC1 centriolar protein A [Source:HGNC Symbol;Acc:HGNC:24488]	Diploid	Diploid
ENSG00000149021	SCGB1A1	secretoglobin, family 1A, member 1 (uteroglobin) [Source:HGNC Symbol;Acc:12523]	ENSMMUG00000031123	SCGB1A1	secretoglobin family 1A member 1 [Source:HGNC Symbol;Acc:HGNC:12523]	Diploid	Diploid
ENSG00000112697	TMEM30A	transmembrane protein 30A [Source:HGNC Symbol;Acc:16667]	ENSMMUG00000019273	TMEM30A	transmembrane protein 30A [Source:HGNC Symbol;Acc:HGNC:16667]	Diploid	Diploid
ENSG00000204296	C6orf10	chromosome 6 open reading frame 10 [Source:HGNC Symbol;Acc:13922]	ENSMMUG00000018425	C6orf10	chromosome 6 open reading frame 10 [Source:HGNC Symbol;Acc:HGNC:13922]	Diploid	Diploid
ENSG00000134480	CCNH	cyclin H [Source:HGNC Symbol;Acc:1594]	ENSMMUG00000003248	CCNH	cyclin H [Source:HGNC Symbol;Acc:HGNC:1594]	Diploid	Diploid
ENSG00000141934	PPAP2C	phosphatidic acid phosphatase type 2C [Source:HGNC Symbol;Acc:9230]	ENSMMUG00000023716	PLPP2	phospholipid phosphatase 2 [Source:HGNC Symbol;Acc:HGNC:9230]	Diploid	Diploid
ENSG00000146618	FERD3L	Fer3-like bHLH transcription factor [Source:HGNC Symbol;Acc:16660]	ENSMMUG00000011174	FERD3L	Fer3 like bHLH transcription factor [Source:HGNC Symbol;Acc:HGNC:16660]	Diploid	Diploid
ENSG00000011677	GABRA3	gamma-aminobutyric acid (GABA) A receptor, alpha 3 [Source:HGNC Symbol;Acc:4077]	ENSMMUG00000001540	GABRA3	gamma-aminobutyric acid type A receptor alpha3 subunit [Source:HGNC Symbol;Acc:HGNC:4077]	Diploid	Diploid
ENSG00000121053	EPX	eosinophil peroxidase [Source:HGNC Symbol;Acc:3423]	ENSMMUG00000011973	EPX	eosinophil peroxidase [Source:HGNC Symbol;Acc:HGNC:3423]	Diploid	Diploid
ENSG00000105849	TWISTNB	TWIST neighbor [Source:HGNC Symbol;Acc:18027]	ENSMMUG00000009609	TWISTNB	TWIST neighbor [Source:HGNC Symbol;Acc:HGNC:18027]	Diploid	Diploid
ENSG00000108021	FAM208B	family with sequence similarity 208, member B [Source:HGNC Symbol;Acc:23484]	ENSMMUG00000013180	FAM208B	family with sequence similarity 208 member B [Source:HGNC Symbol;Acc:HGNC:23484]	Diploid	Diploid
ENSG00000131165	CHMP1A	charged multivesicular body protein 1A [Source:HGNC Symbol;Acc:8740]	ENSMMUG00000014909	CHMP1A	charged multivesicular body protein 1A [Source:HGNC Symbol;Acc:HGNC:8740]	Diploid	Diploid
ENSG00000140474	ULK3	unc-51 like kinase 3 [Source:HGNC Symbol;Acc:19703]	ENSMMUG00000012972	ULK3	unc-51 like kinase 3 [Source:HGNC Symbol;Acc:HGNC:19703]	Diploid	Diploid
ENSG00000166558	SLC38A8	solute carrier family 38, member 8 [Source:HGNC Symbol;Acc:32434]	ENSMMUG00000029070	SLC38A8	solute carrier family 38 member 8 [Source:HGNC Symbol;Acc:HGNC:32434]	Diploid	Diploid
ENSG00000183840	GPR39	G protein-coupled receptor 39 [Source:HGNC Symbol;Acc:4496]	ENSMMUG00000016115	GPR39	G protein-coupled receptor 39 [Source:HGNC Symbol;Acc:HGNC:4496]	Diploid	Diploid
ENSG00000140691	ARMC5	armadillo repeat containing 5 [Source:HGNC Symbol;Acc:25781]	ENSMMUG00000000895	ARMC5	armadillo repeat containing 5 [Source:HGNC Symbol;Acc:HGNC:25781]	Diploid	Diploid
ENSG00000132563	REEP2	receptor accessory protein 2 [Source:HGNC Symbol;Acc:17975]	ENSMMUG00000000456	REEP2	receptor accessory protein 2 [Source:HGNC Symbol;Acc:HGNC:17975]	Diploid	Diploid
ENSG00000135617	PRADC1	protease-associated domain containing 1 [Source:HGNC Symbol;Acc:16047]	ENSMMUG00000012446	PRADC1	protease associated domain containing 1 [Source:HGNC Symbol;Acc:HGNC:16047]	Diploid	Diploid
ENSG00000166073	GPR176	G protein-coupled receptor 176 [Source:HGNC Symbol;Acc:32370]	ENSMMUG00000006039	GPR176	G protein-coupled receptor 176 [Source:HGNC Symbol;Acc:HGNC:32370]	Diploid	Diploid
ENSG00000133110	POSTN	periostin, osteoblast specific factor [Source:HGNC Symbol;Acc:16953]	ENSMMUG00000012307	POSTN	periostin [Source:HGNC Symbol;Acc:HGNC:16953]	Diploid	Diploid
ENSG00000061492	WNT8A	wingless-type MMTV integration site family, member 8A [Source:HGNC Symbol;Acc:12788]	ENSMMUG00000022937	WNT8A	Wnt family member 8A [Source:HGNC Symbol;Acc:HGNC:12788]	Diploid	Diploid
ENSG00000205755	CRLF2	cytokine receptor-like factor 2 [Source:HGNC Symbol;Acc:14281]	ENSMMUG00000047385			Diploid	Diploid
ENSG00000168701	TMEM208	transmembrane protein 208 [Source:HGNC Symbol;Acc:25015]	ENSMMUG00000020263	TMEM208	transmembrane protein 208 [Source:HGNC Symbol;Acc:HGNC:25015]	Diploid	Diploid
ENSG00000150667	FSIP1	fibrous sheath interacting protein 1 [Source:HGNC Symbol;Acc:21674]	ENSMMUG00000006038	FSIP1	fibrous sheath interacting protein 1 [Source:HGNC Symbol;Acc:HGNC:21674]	Diploid	Diploid
ENSG00000138030	KHK	ketohexokinase (fructokinase) [Source:HGNC Symbol;Acc:6315]	ENSMMUG00000016047	KHK	ketohexokinase [Source:HGNC Symbol;Acc:HGNC:6315]	Diploid	Diploid
ENSG00000137801	THBS1	thrombospondin 1 [Source:HGNC Symbol;Acc:11785]	ENSMMUG00000006035	THBS1	thrombospondin 1 [Source:HGNC Symbol;Acc:HGNC:11785]	Diploid	Diploid
ENSG00000078808	SDF4	stromal cell derived factor 4 [Source:HGNC Symbol;Acc:24188]	ENSMMUG00000019518	SDF4	stromal cell derived factor 4 [Source:HGNC Symbol;Acc:HGNC:24188]	Diploid	Diploid
ENSG00000167523	SPATA33	spermatogenesis associated 33 [Source:HGNC Symbol;Acc:26463]	ENSMMUG00000014908	SPATA33	spermatogenesis associated 33 [Source:HGNC Symbol;Acc:HGNC:26463]	Diploid	Diploid
ENSG00000198885	ITPRIPL1	inositol 1,4,5-trisphosphate receptor interacting protein-like 1 [Source:HGNC Symbol;Acc:29371]	ENSMMUG00000023268	ITPRIPL1	ITPRIP like 1 [Source:HGNC Symbol;Acc:HGNC:29371]	Diploid	Diploid
ENSG00000183733	FIGLA	folliculogenesis specific basic helix-loop-helix [Source:HGNC Symbol;Acc:24669]	ENSMMUG00000020852	FIGLA	folliculogenesis specific bHLH transcription factor [Source:HGNC Symbol;Acc:HGNC:24669]	Diploid	Diploid
ENSG00000168758	SEMA4C	sema domain, immunoglobulin domain (Ig), transmembrane domain (TM) and short cytoplasmic domain, (semaphorin) 4C [Source:HGNC Symbol;Acc:10731]	ENSMMUG00000040289	SEMA4C	semaphorin-4C precursor [Source:RefSeq peptide;Acc:NP_001253387]	Diploid	Diploid
ENSG00000153094	BCL2L11	BCL2-like 11 (apoptosis facilitator) [Source:HGNC Symbol;Acc:994]	ENSMMUG00000018423	BCL2L11	BCL2 like 11 [Source:HGNC Symbol;Acc:HGNC:994]	Diploid	Diploid
ENSG00000145715	RASA1	RAS p21 protein activator (GTPase activating protein) 1 [Source:HGNC Symbol;Acc:9871]	ENSMMUG00000003245	RASA1	RAS p21 protein activator 1 [Source:HGNC Symbol;Acc:HGNC:9871]	Diploid	Diploid
ENSG00000174132	FAM174A	family with sequence similarity 174, member A [Source:HGNC Symbol;Acc:24943]	ENSMMUG00000014863	FAM174A	family with sequence similarity 174 member A [Source:HGNC Symbol;Acc:HGNC:24943]	Diploid	Diploid
ENSG00000093144	ECHDC1	enoyl CoA hydratase domain containing 1 [Source:HGNC Symbol;Acc:21489]	ENSMMUG00000015352	ECHDC1	enoyl CoA hydratase domain containing 1 [Source:RefSeq peptide;Acc:NP_001248434]	Diploid	Diploid
ENSG00000147231	CXorf57	chromosome X open reading frame 57 [Source:HGNC Symbol;Acc:25486]	ENSMMUG00000014606	CXorf57	chromosome X open reading frame 57 [Source:HGNC Symbol;Acc:HGNC:25486]	Diploid	Diploid
ENSG00000164458	T	T, brachyury homolog (mouse) [Source:HGNC Symbol;Acc:11515]	ENSMMUG00000017047	T	T brachyury transcription factor [Source:HGNC Symbol;Acc:HGNC:11515]	Diploid	Diploid
ENSG00000145495	MARCH6	membrane-associated ring finger (C3HC4) 6, E3 ubiquitin protein ligase [Source:HGNC Symbol;Acc:30550]	ENSMMUG00000009758	MARCH6	membrane associated ring-CH-type finger 6 [Source:HGNC Symbol;Acc:HGNC:30550]	Diploid	Diploid
ENSG00000060237	WNK1	WNK lysine deficient protein kinase 1 [Source:HGNC Symbol;Acc:14540]	ENSMMUG00000018650	WNK1	WNK lysine deficient protein kinase 1 [Source:HGNC Symbol;Acc:HGNC:14540]	Diploid	Diploid
ENSG00000213676	ATF6B	activating transcription factor 6 beta [Source:HGNC Symbol;Acc:2349]	ENSMMUG00000015229	ATF6B	activating transcription factor 6 beta [Source:HGNC Symbol;Acc:HGNC:2349]	Diploid	Diploid
ENSG00000169548	ZNF280A	zinc finger protein 280A [Source:HGNC Symbol;Acc:18597]	ENSMMUG00000014309	ZNF280A	zinc finger protein 280A [Source:HGNC Symbol;Acc:HGNC:18597]	CNV as a whole	Diploid
ENSG00000130005	GAMT	guanidinoacetate N-methyltransferase [Source:HGNC Symbol;Acc:4136]	ENSMMUG00000003046	GAMT	guanidinoacetate N-methyltransferase [Source:HGNC Symbol;Acc:HGNC:4136]	Diploid	Diploid
ENSG00000104517	UBR5	ubiquitin protein ligase E3 component n-recognin 5 [Source:HGNC Symbol;Acc:16806]	ENSMMUG00000020766	UBR5	ubiquitin protein ligase E3 component n-recognin 5 [Source:HGNC Symbol;Acc:HGNC:16806]	Diploid	Diploid
ENSG00000198742	SMURF1	SMAD specific E3 ubiquitin protein ligase 1 [Source:HGNC Symbol;Acc:16807]	ENSMMUG00000009183	SMURF1	SMAD specific E3 ubiquitin protein ligase 1 [Source:HGNC Symbol;Acc:HGNC:16807]	Diploid	Diploid
ENSG00000176022	B3GALT6	UDP-Gal:betaGal beta 1,3-galactosyltransferase polypeptide 6 [Source:HGNC Symbol;Acc:17978]	ENSMMUG00000019519	B3GALT6	beta-1,3-galactosyltransferase 6 [Source:HGNC Symbol;Acc:HGNC:17978]	Diploid	Diploid
ENSG00000069431	ABCC9	ATP-binding cassette, sub-family C (CFTR/MRP), member 9 [Source:HGNC Symbol;Acc:60]	ENSMMUG00000020806	ABCC9	ATP binding cassette subfamily C member 9 [Source:HGNC Symbol;Acc:HGNC:60]	Diploid	Diploid
ENSG00000184163	FAM132A	family with sequence similarity 132, member A [Source:HGNC Symbol;Acc:32308]	ENSMMUG00000030888	C1QTNF12	C1q and TNF related 12 [Source:HGNC Symbol;Acc:HGNC:32308]	Diploid	Diploid
ENSG00000197565	COL4A6	collagen, type IV, alpha 6 [Source:HGNC Symbol;Acc:2208]	ENSMMUG00000007205	COL4A6	collagen type IV alpha 6 chain [Source:HGNC Symbol;Acc:HGNC:2208]	Diploid	Diploid
ENSG00000206432	TMEM200C	transmembrane protein 200C [Source:HGNC Symbol;Acc:37208]	ENSMMUG00000039953	TMEM200C	transmembrane protein 200C [Source:HGNC Symbol;Acc:HGNC:37208]	Diploid	Diploid
ENSG00000198223	CSF2RA	colony stimulating factor 2 receptor, alpha, low-affinity (granulocyte-macrophage) [Source:HGNC Symbol;Acc:2435]	ENSMMUG00000039887	CSF2RA	colony stimulating factor 2 receptor alpha subunit [Source:HGNC Symbol;Acc:HGNC:2435]	Diploid	Diploid
ENSG00000167658	EEF2	eukaryotic translation elongation factor 2 [Source:HGNC Symbol;Acc:3214]	ENSMMUG00000022767			Diploid	Diploid
ENSG00000101216	GMEB2	glucocorticoid modulatory element binding protein 2 [Source:HGNC Symbol;Acc:4371]	ENSMMUG00000039256	GMEB2	glucocorticoid modulatory element binding protein 2 [Source:HGNC Symbol;Acc:HGNC:4371]	Diploid	Diploid
ENSG00000006283	CACNA1G	calcium channel, voltage-dependent, T type, alpha 1G subunit [Source:HGNC Symbol;Acc:1394]	ENSMMUG00000017256	CACNA1G	calcium voltage-gated channel subunit alpha1 G [Source:HGNC Symbol;Acc:HGNC:1394]	Diploid	Diploid
ENSG00000136144	RCBTB1	regulator of chromosome condensation (RCC1) and BTB (POZ) domain containing protein 1 [Source:HGNC Symbol;Acc:18243]	ENSMMUG00000021029	RCBTB1	RCC1 and BTB domain containing protein 1 [Source:HGNC Symbol;Acc:HGNC:18243]	Diploid	Diploid
ENSG00000155465	SLC7A7	solute carrier family 7 (amino acid transporter light chain, y+L system), member 7 [Source:HGNC Symbol;Acc:11065]	ENSMMUG00000000413	SLC7A7	solute carrier family 7 member 7 [Source:HGNC Symbol;Acc:HGNC:11065]	Diploid	Diploid
ENSG00000107807	TLX1	T-cell leukemia homeobox 1 [Source:HGNC Symbol;Acc:5056]	ENSMMUG00000017667	TLX1	T-cell leukemia homeobox 1 [Source:HGNC Symbol;Acc:HGNC:5056]	Diploid	Diploid
ENSG00000137413	TAF8	TAF8 RNA polymerase II, TATA box binding protein (TBP)-associated factor, 43kDa [Source:HGNC Symbol;Acc:17300]	ENSMMUG00000012470	TAF8	TATA-box binding protein associated factor 8 [Source:HGNC Symbol;Acc:HGNC:17300]	Diploid	Diploid
ENSG00000198728	LDB1	LIM domain binding 1 [Source:HGNC Symbol;Acc:6532]	ENSMMUG00000009375	LDB1	LIM domain binding 1 [Source:HGNC Symbol;Acc:HGNC:6532]	Diploid	Diploid
ENSG00000184905	TCEAL2	transcription elongation factor A (SII)-like 2 [Source:HGNC Symbol;Acc:29818]	ENSMMUG00000018770	TCEAL2	transcription elongation factor A like 2 [Source:HGNC Symbol;Acc:HGNC:29818]	Diploid	Diploid
ENSG00000154655	L3MBTL4	l(3)mbt-like 4 (Drosophila) [Source:HGNC Symbol;Acc:26677]	ENSMMUG00000016302	L3MBTL4	L3MBTL4, histone methyl-lysine binding protein [Source:HGNC Symbol;Acc:HGNC:26677]	Diploid	Diploid
ENSG00000188021	UBQLN2	ubiquilin 2 [Source:HGNC Symbol;Acc:12509]	ENSMMUG00000042087	UBQLN2	ubiquilin 2 [Source:HGNC Symbol;Acc:HGNC:12509]	Diploid	Diploid
ENSG00000150316	CWC15	CWC15 spliceosome-associated protein homolog (S. cerevisiae) [Source:HGNC Symbol;Acc:26939]	ENSMMUG00000044962	CWC15	CWC15 spliceosome-associated protein [Source:HGNC Symbol;Acc:HGNC:26939]	Diploid	Diploid
ENSG00000130720	FIBCD1	fibrinogen C domain containing 1 [Source:HGNC Symbol;Acc:25922]	ENSMMUG00000012713	FIBCD1	fibrinogen C domain containing 1 [Source:HGNC Symbol;Acc:HGNC:25922]	Diploid	Diploid
ENSG00000153560	UBP1	upstream binding protein 1 (LBP-1a) [Source:HGNC Symbol;Acc:12507]	ENSMMUG00000016917	UBP1	upstream binding protein 1 [Source:HGNC Symbol;Acc:HGNC:12507]	Diploid	Diploid
ENSG00000146122	DAAM2	dishevelled associated activator of morphogenesis 2 [Source:HGNC Symbol;Acc:18143]	ENSMMUG00000019072	DAAM2	dishevelled associated activator of morphogenesis 2 [Source:HGNC Symbol;Acc:HGNC:18143]	Diploid	Diploid
ENSG00000140682	TGFB1I1	transforming growth factor beta 1 induced transcript 1 [Source:HGNC Symbol;Acc:11767]	ENSMMUG00000000896	TGFB1I1	transforming growth factor beta 1 induced transcript 1 [Source:HGNC Symbol;Acc:HGNC:11767]	Diploid	Diploid
ENSG00000125968	ID1	inhibitor of DNA binding 1, dominant negative helix-loop-helix protein [Source:HGNC Symbol;Acc:5360]	ENSMMUG00000004403	ID1	inhibitor of DNA binding 1, HLH protein [Source:HGNC Symbol;Acc:HGNC:5360]	Diploid	Diploid
ENSG00000179580	RNF151	ring finger protein 151 [Source:HGNC Symbol;Acc:23235]	ENSMMUG00000007940	RNF151	ring finger protein 151 [Source:HGNC Symbol;Acc:HGNC:23235]	Diploid	Diploid
ENSG00000137204	SLC22A7	solute carrier family 22 (organic anion transporter), member 7 [Source:HGNC Symbol;Acc:10971]	ENSMMUG00000022941	SLC22A7	solute carrier family 22 member 7 [Source:HGNC Symbol;Acc:HGNC:10971]	Diploid	Diploid
ENSG00000118407	FILIP1	filamin A interacting protein 1 [Source:HGNC Symbol;Acc:21015]	ENSMMUG00000019275	FILIP1	filamin A interacting protein 1 [Source:HGNC Symbol;Acc:HGNC:21015]	Diploid	Diploid
ENSG00000196747	HIST1H2AI	histone cluster 1, H2ai [Source:HGNC Symbol;Acc:4725]	ENSMMUG00000042665	HIST1H2AD	histone H2A type 1-D [Source:RefSeq peptide;Acc:NP_001180722]	Duplicated and fixed as a whole	Diploid
ENSG00000127586	CHTF18	CTF18, chromosome transmission fidelity factor 18 homolog (S. cerevisiae) [Source:HGNC Symbol;Acc:18435]	ENSMMUG00000000843	CHTF18	chromosome transmission fidelity factor 18 [Source:HGNC Symbol;Acc:HGNC:18435]	Diploid	Diploid
ENSG00000173452	TMEM196	transmembrane protein 196 [Source:HGNC Symbol;Acc:22431]	ENSMMUG00000009610	TMEM196	transmembrane protein 196 [Source:RefSeq peptide;Acc:NP_001181152]	Diploid	Diploid
ENSG00000027075	PRKCH	protein kinase C, eta [Source:HGNC Symbol;Acc:9403]	ENSMMUG00000002260	PRKCH	protein kinase C eta [Source:HGNC Symbol;Acc:HGNC:9403]	Diploid	Diploid
ENSG00000139793	MBNL2	muscleblind-like splicing regulator 2 [Source:HGNC Symbol;Acc:16746]	ENSMMUG00000022744	MBNL2	muscleblind like splicing regulator 2 [Source:HGNC Symbol;Acc:HGNC:16746]	Diploid	Diploid
ENSG00000116031	CD207	CD207 molecule, langerin [Source:HGNC Symbol;Acc:17935]	ENSMMUG00000020855	CD207	CD207 molecule [Source:HGNC Symbol;Acc:HGNC:17935]	Diploid	Diploid
ENSG00000108465	CDK5RAP3	CDK5 regulatory subunit associated protein 3 [Source:HGNC Symbol;Acc:18673]	ENSMMUG00000004760	CDK5RAP3	CDK5 regulatory subunit associated protein 3 [Source:HGNC Symbol;Acc:HGNC:18673]	Diploid	Diploid
ENSG00000141994	DUS3L	dihydrouridine synthase 3-like (S. cerevisiae) [Source:HGNC Symbol;Acc:26920]	ENSMMUG00000031027	DUS3L	dihydrouridine synthase 3 like [Source:HGNC Symbol;Acc:HGNC:26920]	Diploid	Diploid
ENSG00000120738	EGR1	early growth response 1 [Source:HGNC Symbol;Acc:3238]	ENSMMUG00000018025	EGR1	early growth response 1 [Source:HGNC Symbol;Acc:HGNC:3238]	Diploid	Diploid
ENSG00000124615	MOCS1	molybdenum cofactor synthesis 1 [Source:HGNC Symbol;Acc:7190]	ENSMMUG00000021315	MOCS1	molybdenum cofactor synthesis 1 [Source:HGNC Symbol;Acc:HGNC:7190]	Diploid	Diploid
ENSG00000011143	MKS1	Meckel syndrome, type 1 [Source:HGNC Symbol;Acc:7121]	ENSMMUG00000011971	MKS1	Meckel syndrome, type 1 [Source:HGNC Symbol;Acc:HGNC:7121]	Diploid	Diploid
ENSG00000100053	CRYBB3	crystallin, beta B3 [Source:HGNC Symbol;Acc:2400]	ENSMMUG00000006852	CRYBB3	crystallin beta B3 [Source:HGNC Symbol;Acc:HGNC:2400]	Diploid	Diploid
ENSG00000165496	RPL10L	ribosomal protein L10-like [Source:HGNC Symbol;Acc:17976]	ENSMMUG00000011609			Diploid	Diploid
ENSG00000183036	PCP4	Purkinje cell protein 4 [Source:HGNC Symbol;Acc:8742]	ENSMMUG00000041181	PCP4	Purkinje cell protein 4 [Source:HGNC Symbol;Acc:HGNC:8742]	Diploid	Diploid
ENSG00000146215	CRIP3	cysteine-rich protein 3 [Source:HGNC Symbol;Acc:17751]	ENSMMUG00000022942	CRIP3	cysteine rich protein 3 [Source:HGNC Symbol;Acc:HGNC:17751]	Diploid	Diploid
ENSG00000095932	C19orf77	chromosome 19 open reading frame 77 [Source:HGNC Symbol;Acc:37244]	ENSMMUG00000010560	SMIM24	small integral membrane protein 24 [Source:HGNC Symbol;Acc:HGNC:37244]	Diploid	Diploid
ENSG00000089472	HEPH	hephaestin [Source:HGNC Symbol;Acc:4866]	ENSMMUG00000002805	HEPH	hephaestin [Source:HGNC Symbol;Acc:HGNC:4866]	Diploid	Diploid
ENSG00000253598	SLC10A5	solute carrier family 10, member 5 [Source:HGNC Symbol;Acc:22981]	ENSMMUG00000048476	SLC10A5	solute carrier family 10 member 5 [Source:HGNC Symbol;Acc:HGNC:22981]	Diploid	Diploid
ENSG00000068078	FGFR3	fibroblast growth factor receptor 3 [Source:HGNC Symbol;Acc:3690]	ENSMMUG00000019945	FGFR3	fibroblast growth factor receptor 3 [Source:HGNC Symbol;Acc:HGNC:3690]	Diploid	Diploid
ENSG00000187242	KRT12	keratin 12 [Source:HGNC Symbol;Acc:6414]	ENSMMUG00000001502	KRT12	keratin 12 [Source:HGNC Symbol;Acc:HGNC:6414]	Diploid	Diploid
ENSG00000211598	IGKV4-1	immunoglobulin kappa variable 4-1 [Source:HGNC Symbol;Acc:5834]	ENSMMUG00000008319	IGKV4-1	immunoglobulin kappa variable 4-1 [Source:HGNC Symbol;Acc:HGNC:5834]	Diploid	Diploid
ENSG00000101144	BMP7	bone morphogenetic protein 7 [Source:HGNC Symbol;Acc:1074]	ENSMMUG00000004074	BMP7	bone morphogenetic protein 7 [Source:HGNC Symbol;Acc:HGNC:1074]	Diploid	Diploid
ENSG00000211599	IGKV5-2	immunoglobulin kappa variable 5-2 [Source:HGNC Symbol;Acc:5835]	ENSMMUG00000044063	IGKV5-2	immunoglobulin kappa variable 5-2 [Source:HGNC Symbol;Acc:HGNC:5835]	CNV as a whole	Diploid
ENSG00000007376	RPUSD1	RNA pseudouridylate synthase domain containing 1 [Source:HGNC Symbol;Acc:14173]	ENSMMUG00000000842	RPUSD1	RNA pseudouridylate synthase domain containing 1 [Source:HGNC Symbol;Acc:HGNC:14173]	Diploid	Diploid
ENSG00000183580	FBXL7	F-box and leucine-rich repeat protein 7 [Source:HGNC Symbol;Acc:13604]	ENSMMUG00000013364	FBXL7	F-box and leucine rich repeat protein 7 [Source:HGNC Symbol;Acc:HGNC:13604]	Diploid	Diploid
ENSG00000171431	KRT20	keratin 20 [Source:HGNC Symbol;Acc:20412]	ENSMMUG00000001503	KRT20	keratin 20 [Source:HGNC Symbol;Acc:HGNC:20412]	Diploid	Diploid
ENSG00000144504	ANKMY1	ankyrin repeat and MYND domain containing 1 [Source:HGNC Symbol;Acc:20987]	ENSMMUG00000014835	ANKMY1	ankyrin repeat and MYND domain containing 1 [Source:HGNC Symbol;Acc:HGNC:20987]	Diploid	Diploid
ENSG00000178093	TSSK6	testis-specific serine kinase 6 [Source:HGNC Symbol;Acc:30410]	ENSMMUG00000049072	TSSK6	testis specific serine kinase 6 [Source:HGNC Symbol;Acc:HGNC:30410]	Diploid	Diploid
ENSG00000182545	RNASE10	ribonuclease, RNase A family, 10 (non-active) [Source:HGNC Symbol;Acc:19275]	ENSMMUG00000019128	RNASE10	ribonuclease A family member 10 (inactive) [Source:HGNC Symbol;Acc:HGNC:19275]	Diploid	Diploid
ENSG00000250067	YJEFN3	YjeF N-terminal domain containing 3 [Source:HGNC Symbol;Acc:24785]	ENSMMUG00000011351	YJEFN3	YjeF N-terminal domain containing 3 [Source:HGNC Symbol;Acc:HGNC:24785]	Diploid	Diploid
ENSG00000168566	SNRNP48	small nuclear ribonucleoprotein 48kDa (U11/U12) [Source:HGNC Symbol;Acc:21368]	ENSMMUG00000014785	SNRNP48	small nuclear ribonucleoprotein U11/U12 subunit 48 [Source:HGNC Symbol;Acc:HGNC:21368]	Diploid	Diploid
ENSG00000147145	LPAR4	lysophosphatidic acid receptor 4 [Source:HGNC Symbol;Acc:4478]	ENSMMUG00000016961	LPAR4	lysophosphatidic acid receptor 4 [Source:HGNC Symbol;Acc:HGNC:4478]	Diploid	Diploid
ENSG00000135624	CCT7	chaperonin containing TCP1, subunit 7 (eta) [Source:HGNC Symbol;Acc:1622]	ENSMMUG00000012448			Diploid	Diploid
ENSG00000129221	AIPL1	aryl hydrocarbon receptor interacting protein-like 1 [Source:HGNC Symbol;Acc:359]	ENSMMUG00000017759	AIPL1	aryl-hydrocarbon-interacting protein-like 1 [Source:RefSeq peptide;Acc:NP_001028104]	Diploid	Diploid
ENSG00000182107	TMEM30B	transmembrane protein 30B [Source:HGNC Symbol;Acc:27254]	ENSMMUG00000007264	TMEM30B	transmembrane protein 30B [Source:HGNC Symbol;Acc:HGNC:27254]	Diploid	Diploid
ENSG00000086717	PPEF1	protein phosphatase, EF-hand calcium binding domain 1 [Source:HGNC Symbol;Acc:9243]	ENSMMUG00000005066	PPEF1	protein phosphatase with EF-hand domain 1 [Source:HGNC Symbol;Acc:HGNC:9243]	Diploid	Diploid
ENSG00000116039	ATP6V1B1	ATPase, H+ transporting, lysosomal 56/58kDa, V1 subunit B1 [Source:HGNC Symbol;Acc:853]	ENSMMUG00000002090	ATP6V1B1	ATPase H+ transporting V1 subunit B1 [Source:HGNC Symbol;Acc:HGNC:853]	Diploid	Diploid
ENSG00000167419	LPO	lactoperoxidase [Source:HGNC Symbol;Acc:6678]	ENSMMUG00000002264	LPO	lactoperoxidase [Source:HGNC Symbol;Acc:HGNC:6678]	Diploid	Diploid
ENSG00000108244	KRT23	keratin 23 (histone deacetylase inducible) [Source:HGNC Symbol;Acc:6438]	ENSMMUG00000001505	KRT23	keratin 23 [Source:HGNC Symbol;Acc:HGNC:6438]	Diploid	Diploid
ENSG00000004948	CALCR	calcitonin receptor [Source:HGNC Symbol;Acc:1440]	ENSMMUG00000014319	CALCR	calcitonin receptor [Source:HGNC Symbol;Acc:HGNC:1440]	Diploid	Diploid
ENSG00000063180	CA11	carbonic anhydrase XI [Source:HGNC Symbol;Acc:1370]	ENSMMUG00000022161	CA11	carbonic anhydrase 11 [Source:HGNC Symbol;Acc:HGNC:1370]	Diploid	Diploid
ENSG00000176771	NCKAP5	NCK-associated protein 5 [Source:HGNC Symbol;Acc:29847]	ENSMMUG00000045491	NCKAP5	NCK associated protein 5 [Source:HGNC Symbol;Acc:HGNC:29847]	Diploid	Diploid
ENSG00000083168	KAT6A	K(lysine) acetyltransferase 6A [Source:HGNC Symbol;Acc:13013]	ENSMMUG00000010891	KAT6A	lysine acetyltransferase 6A [Source:HGNC Symbol;Acc:HGNC:13013]	Diploid	Diploid
ENSG00000148482	SLC39A12	solute carrier family 39 (zinc transporter), member 12 [Source:HGNC Symbol;Acc:20860]	ENSMMUG00000011624	SLC39A12	solute carrier family 39 member 12 [Source:HGNC Symbol;Acc:HGNC:20860]	Diploid	Diploid
ENSG00000087266	SH3BP2	SH3-domain binding protein 2 [Source:HGNC Symbol;Acc:10825]	ENSMMUG00000014335	SH3BP2	SH3 domain binding protein 2 [Source:HGNC Symbol;Acc:HGNC:10825]	Diploid	Diploid
ENSG00000127588	GNG13	guanine nucleotide binding protein (G protein), gamma 13 [Source:HGNC Symbol;Acc:14131]	ENSMMUG00000000846	GNG13	G protein subunit gamma 13 [Source:HGNC Symbol;Acc:HGNC:14131]	Diploid	Diploid
ENSG00000165197	FIGF	c-fos induced growth factor (vascular endothelial growth factor D) [Source:HGNC Symbol;Acc:3708]	ENSMMUG00000015738	VEGFD	vascular endothelial growth factor D [Source:HGNC Symbol;Acc:HGNC:3708]	Diploid	Diploid
ENSG00000155875	FAM154A	family with sequence similarity 154, member A [Source:HGNC Symbol;Acc:28566]	ENSMMUG00000018394	SAXO1	stabilizer of axonemal microtubules 1 [Source:HGNC Symbol;Acc:HGNC:28566]	Diploid	Diploid
ENSG00000155876	RRAGA	Ras-related GTP binding A [Source:HGNC Symbol;Acc:16963]	ENSMMUG00000018395	RRAGA	Ras related GTP binding A [Source:HGNC Symbol;Acc:HGNC:16963]	Diploid	Diploid
ENSG00000125249	RAP2A	RAP2A, member of RAS oncogene family [Source:HGNC Symbol;Acc:9861]	ENSMMUG00000047433	RAP2A	RAP2A, member of RAS oncogene family [Source:HGNC Symbol;Acc:HGNC:9861]	Diploid	Diploid
ENSG00000104848	KCNA7	potassium voltage-gated channel, shaker-related subfamily, member 7 [Source:HGNC Symbol;Acc:6226]	ENSMMUG00000040800	KCNA7	potassium voltage-gated channel subfamily A member 7 [Source:HGNC Symbol;Acc:HGNC:6226]	Diploid	Diploid
ENSG00000183742	MACC1	metastasis associated in colon cancer 1 [Source:HGNC Symbol;Acc:30215]	ENSMMUG00000022683	MACC1	MACC1, MET transcriptional regulator [Source:HGNC Symbol;Acc:HGNC:30215]	Diploid	Diploid
ENSG00000105612	DNASE2	deoxyribonuclease II, lysosomal [Source:HGNC Symbol;Acc:2960]	ENSMMUG00000028866	DNASE2	deoxyribonuclease 2, lysosomal [Source:HGNC Symbol;Acc:HGNC:2960]	Diploid	Diploid
ENSG00000168939	SPRY3	sprouty homolog 3 (Drosophila) [Source:HGNC Symbol;Acc:11271]	ENSMMUG00000043228	SPRY3	sprouty RTK signaling antagonist 3 [Source:HGNC Symbol;Acc:HGNC:11271]	Diploid	Diploid
ENSG00000197579	TOPORS	topoisomerase I binding, arginine/serine-rich, E3 ubiquitin protein ligase [Source:HGNC Symbol;Acc:21653]	ENSMMUG00000002686	TOPORS	TOP1 binding arginine/serine rich protein [Source:HGNC Symbol;Acc:HGNC:21653]	Diploid	Diploid
ENSG00000116035	VAX2	ventral anterior homeobox 2 [Source:HGNC Symbol;Acc:12661]	ENSMMUG00000002087	VAX2	ventral anterior homeobox 2 [Source:HGNC Symbol;Acc:HGNC:12661]	Diploid	Diploid
ENSG00000152475	ZNF837	zinc finger protein 837 [Source:HGNC Symbol;Acc:25164]	ENSMMUG00000009387	ZNF837	zinc finger protein 837 [Source:HGNC Symbol;Acc:HGNC:25164]	Diploid	Diploid
ENSG00000104412	EMC2	ER membrane protein complex subunit 2 [Source:HGNC Symbol;Acc:28963]	ENSMMUG00000019260	EMC2	ER membrane protein complex subunit 2 [Source:HGNC Symbol;Acc:HGNC:28963]	Diploid	Diploid
ENSG00000078589	P2RY10	purinergic receptor P2Y, G-protein coupled, 10 [Source:HGNC Symbol;Acc:19906]	ENSMMUG00000040164	P2RY10	putative P2Y purinoceptor 10 [Source:RefSeq peptide;Acc:NP_001245087]	Diploid	Diploid
ENSG00000140943	MBTPS1	membrane-bound transcription factor peptidase, site 1 [Source:HGNC Symbol;Acc:15456]	ENSMMUG00000020053	MBTPS1	membrane bound transcription factor peptidase, site 1 [Source:HGNC Symbol;Acc:HGNC:15456]	Diploid	Diploid
ENSG00000153162	BMP6	bone morphogenetic protein 6 [Source:HGNC Symbol;Acc:1073]	ENSMMUG00000021600	BMP6	bone morphogenetic protein 6 [Source:HGNC Symbol;Acc:HGNC:1073]	Diploid	Diploid
ENSG00000148840	PPRC1	peroxisome proliferator-activated receptor gamma, coactivator-related 1 [Source:HGNC Symbol;Acc:30025]	ENSMMUG00000001186	PPRC1	peroxisome proliferator-activated receptor gamma, coactivator-related 1 [Source:HGNC Symbol;Acc:HGNC:30025]	Diploid	Diploid
ENSG00000239264	TXNDC5	thioredoxin domain containing 5 (endoplasmic reticulum) [Source:HGNC Symbol;Acc:21073]	ENSMMUG00000021601	TXNDC5	thioredoxin domain containing 5 [Source:HGNC Symbol;Acc:HGNC:21073]	Diploid	Diploid
ENSG00000184515	BEX5	brain expressed, X-linked 5 [Source:HGNC Symbol;Acc:27990]	ENSMMUG00000018769	BEX5	brain expressed X-linked 5 [Source:HGNC Symbol;Acc:HGNC:27990]	Diploid	Diploid
ENSG00000177595	PIDD	p53-induced death domain protein [Source:HGNC Symbol;Acc:16491]	ENSMMUG00000016715	PIDD1	p53-induced death domain protein 1 [Source:HGNC Symbol;Acc:HGNC:16491]	Diploid	Diploid
ENSG00000134760	DSG1	desmoglein 1 [Source:HGNC Symbol;Acc:3048]	ENSMMUG00000022703	DSG1	desmoglein 1 [Source:HGNC Symbol;Acc:HGNC:3048]	Diploid	Diploid
ENSG00000111254	AKAP3	A kinase (PRKA) anchor protein 3 [Source:HGNC Symbol;Acc:373]	ENSMMUG00000020812	AKAP3	A-kinase anchoring protein 3 [Source:HGNC Symbol;Acc:HGNC:373]	Diploid	Diploid
ENSG00000144136	SLC20A1	solute carrier family 20 (phosphate transporter), member 1 [Source:HGNC Symbol;Acc:10946]	ENSMMUG00000004574	SLC20A1	sodium-dependent phosphate transporter 1 [Source:RefSeq peptide;Acc:NP_001180783]	Diploid	Diploid
ENSG00000026508	CD44	CD44 molecule (Indian blood group) [Source:HGNC Symbol;Acc:1681]	ENSMMUG00000004327	CD44	CD44 molecule (Indian blood group) [Source:HGNC Symbol;Acc:HGNC:1681]	Diploid	Diploid
ENSG00000109072	VTN	vitronectin [Source:HGNC Symbol;Acc:12724]	ENSMMUG00000019148	VTN	vitronectin [Source:HGNC Symbol;Acc:HGNC:12724]	Diploid	Diploid
ENSG00000049540	ELN	elastin [Source:HGNC Symbol;Acc:3327]	ENSMMUG00000044533	ELN	elastin [Source:HGNC Symbol;Acc:HGNC:3327]	Diploid	Diploid
ENSG00000175065	DSG4	desmoglein 4 [Source:HGNC Symbol;Acc:21307]	ENSMMUG00000022704	DSG4	desmoglein 4 [Source:HGNC Symbol;Acc:HGNC:21307]	Diploid	Diploid
ENSG00000134595	SOX3	SRY (sex determining region Y)-box 3 [Source:HGNC Symbol;Acc:11199]	ENSMMUG00000013179	SOX3	SRY-box 3 [Source:HGNC Symbol;Acc:HGNC:11199]	Diploid	Diploid
ENSG00000123179	EBPL	emopamil binding protein-like [Source:HGNC Symbol;Acc:18061]	ENSMMUG00000020571	EBPL	emopamil binding protein like [Source:HGNC Symbol;Acc:HGNC:18061]	Diploid	Diploid
ENSG00000104852	SNRNP70	small nuclear ribonucleoprotein 70kDa (U1) [Source:HGNC Symbol;Acc:11150]	ENSMMUG00000004928	SNRNP70	U1 small nuclear ribonucleoprotein 70 kDa [Source:RefSeq peptide;Acc:NP_001181761]	Diploid	Diploid
ENSG00000244045	TMEM199	transmembrane protein 199 [Source:HGNC Symbol;Acc:18085]	ENSMMUG00000021351	TMEM199	transmembrane protein 199 [Source:HGNC Symbol;Acc:HGNC:18085]	Diploid	Diploid
ENSG00000169964	TMEM42	transmembrane protein 42 [Source:HGNC Symbol;Acc:28444]	ENSMMUG00000003650	TMEM42	transmembrane protein 42 [Source:HGNC Symbol;Acc:HGNC:28444]	Diploid	Diploid
ENSG00000164841	TMEM74	transmembrane protein 74 [Source:HGNC Symbol;Acc:26409]	ENSMMUG00000016221	TMEM74	transmembrane protein 74 [Source:HGNC Symbol;Acc:HGNC:26409]	Diploid	Diploid
ENSG00000151320	AKAP6	A kinase (PRKA) anchor protein 6 [Source:HGNC Symbol;Acc:376]	ENSMMUG00000015128	AKAP6	A-kinase anchoring protein 6 [Source:HGNC Symbol;Acc:HGNC:376]	Diploid	Diploid
ENSG00000105185	PDCD5	programmed cell death 5 [Source:HGNC Symbol;Acc:8764]	ENSMMUG00000015395	PDCD5	programmed cell death 5 [Source:HGNC Symbol;Acc:HGNC:8764]	Diploid	Diploid
ENSG00000087842	PIR	pirin (iron-binding nuclear protein) [Source:HGNC Symbol;Acc:30048]	ENSMMUG00000015740	PIR	pirin [Source:HGNC Symbol;Acc:HGNC:30048]	Diploid	Diploid
ENSG00000177542	SLC25A22	solute carrier family 25 (mitochondrial carrier: glutamate), member 22 [Source:HGNC Symbol;Acc:19954]	ENSMMUG00000007513	SLC25A22	solute carrier family 25 member 22 [Source:HGNC Symbol;Acc:HGNC:19954]	Diploid	Diploid
ENSG00000124333	VAMP7	vesicle-associated membrane protein 7 [Source:HGNC Symbol;Acc:11486]	ENSMMUG00000002015	VAMP7	Macaca mulatta vesicle-associated membrane protein 7 (VAMP7), mRNA. [Source:RefSeq mRNA;Acc:NM_001261784]	Diploid	Diploid
ENSG00000108405	P2RX1	purinergic receptor P2X, ligand-gated ion channel, 1 [Source:HGNC Symbol;Acc:8533]	ENSMMUG00000008260	P2RX1	purinergic receptor P2X 1 [Source:HGNC Symbol;Acc:HGNC:8533]	Diploid	Diploid
ENSG00000106993	CDC37L1	cell division cycle 37-like 1 [Source:HGNC Symbol;Acc:17179]	ENSMMUG00000000141	CDC37L1	cell division cycle 37 like 1 [Source:HGNC Symbol;Acc:HGNC:17179]	Diploid	Diploid
ENSG00000119048	UBE2B	ubiquitin-conjugating enzyme E2B [Source:HGNC Symbol;Acc:12473]	ENSMMUG00000016641	UBE2B	ubiquitin conjugating enzyme E2 B [Source:HGNC Symbol;Acc:HGNC:12473]	Diploid	Diploid
ENSG00000198785	GRIN3A	glutamate receptor, ionotropic, N-methyl-D-aspartate 3A [Source:HGNC Symbol;Acc:16767]	ENSMMUG00000016675	GRIN3A	glutamate ionotropic receptor NMDA type subunit 3A [Source:HGNC Symbol;Acc:HGNC:16767]	Diploid	Diploid
ENSG00000145879	SPINK7	serine peptidase inhibitor, Kazal type 7 (putative) [Source:HGNC Symbol;Acc:24643]	ENSMMUG00000016907	SPINK7	serine peptidase inhibitor, Kazal type 7 (putative) [Source:HGNC Symbol;Acc:HGNC:24643]	Diploid	Diploid
ENSG00000102010	BMX	BMX non-receptor tyrosine kinase [Source:HGNC Symbol;Acc:1079]	ENSMMUG00000014047	BMX	BMX non-receptor tyrosine kinase [Source:HGNC Symbol;Acc:HGNC:1079]	Diploid	Diploid
ENSG00000176641	RNF152	ring finger protein 152 [Source:HGNC Symbol;Acc:26811]	ENSMMUG00000002431	RNF152	ring finger protein 152 [Source:HGNC Symbol;Acc:HGNC:26811]	Diploid	Diploid
ENSG00000173464	RNASE11	ribonuclease, RNase A family, 11 (non-active) [Source:HGNC Symbol;Acc:19269]	ENSMMUG00000015599	RNASE11	ribonuclease A family member 11 (inactive) [Source:HGNC Symbol;Acc:HGNC:19269]	Diploid	Diploid
ENSG00000204909	SPINK9	serine peptidase inhibitor, Kazal type 9 [Source:HGNC Symbol;Acc:32951]	ENSMMUG00000029782	SPINK9	serine peptidase inhibitor, Kazal type 9 [Source:HGNC Symbol;Acc:HGNC:32951]	Diploid	Diploid
ENSG00000168754	FAM178B	family with sequence similarity 178, member B [Source:HGNC Symbol;Acc:28036]	ENSMMUG00000045714	FAM178B	family with sequence similarity 178 member B [Source:HGNC Symbol;Acc:HGNC:28036]	Diploid	Diploid
ENSG00000174417	TRHR	thyrotropin-releasing hormone receptor [Source:HGNC Symbol;Acc:12299]	ENSMMUG00000008734	TRHR	thyrotropin releasing hormone receptor [Source:HGNC Symbol;Acc:HGNC:12299]	Diploid	Diploid
ENSG00000166002	SMCO4	single-pass membrane protein with coiled-coil domains 4 [Source:HGNC Symbol;Acc:24810]	ENSMMUG00000040519	SMCO4	single-pass membrane protein with coiled-coil domains 4 [Source:HGNC Symbol;Acc:HGNC:24810]	Diploid	Diploid
ENSG00000180530	NRIP1	nuclear receptor interacting protein 1 [Source:HGNC Symbol;Acc:8001]	ENSMMUG00000023770	NRIP1	nuclear receptor interacting protein 1 [Source:HGNC Symbol;Acc:HGNC:8001]	Diploid	Diploid
ENSG00000173338	KCNK7	potassium channel, subfamily K, member 7 [Source:HGNC Symbol;Acc:6282]	ENSMMUG00000007402	KCNK7	potassium two pore domain channel subfamily K member 7 [Source:HGNC Symbol;Acc:HGNC:6282]	Diploid	Diploid
ENSG00000182902	SLC25A18	solute carrier family 25 (glutamate carrier), member 18 [Source:HGNC Symbol;Acc:10988]	ENSMMUG00000031121	SLC25A18	solute carrier family 25 member 18 [Source:HGNC Symbol;Acc:HGNC:10988]	Diploid	Diploid
ENSG00000196408	NOXO1	NADPH oxidase organizer 1 [Source:HGNC Symbol;Acc:19404]	ENSMMUG00000007953	NOXO1	NADPH oxidase organizer 1 [Source:HGNC Symbol;Acc:HGNC:19404]	Diploid	Diploid
ENSG00000108179	PPIF	peptidylprolyl isomerase F [Source:HGNC Symbol;Acc:9259]	ENSMMUG00000003189	PPIF	peptidyl-prolyl cis-trans isomerase F, mitochondrial [Source:RefSeq peptide;Acc:NP_001253053]	Diploid	Diploid
ENSG00000070047	PHRF1	PHD and ring finger domains 1 [Source:HGNC Symbol;Acc:24351]	ENSMMUG00000004012	PHRF1	PHD and ring finger domains 1 [Source:HGNC Symbol;Acc:HGNC:24351]	Diploid	Diploid
ENSG00000149218	ENDOD1	endonuclease domain containing 1 [Source:HGNC Symbol;Acc:29129]	ENSMMUG00000047793	ENDOD1	endonuclease domain containing 1 [Source:HGNC Symbol;Acc:HGNC:29129]	Diploid	Diploid
ENSG00000108349	CASC3	cancer susceptibility candidate 3 [Source:HGNC Symbol;Acc:17040]	ENSMMUG00000045187	CASC3	cancer susceptibility 3 [Source:HGNC Symbol;Acc:HGNC:17040]	Diploid	Diploid
ENSG00000100997	ABHD12	abhydrolase domain containing 12 [Source:HGNC Symbol;Acc:15868]	ENSMMUG00000009201	ABHD12	abhydrolase domain containing 12 [Source:HGNC Symbol;Acc:HGNC:15868]	Diploid	Diploid
ENSG00000074317	SNCB	synuclein, beta [Source:HGNC Symbol;Acc:11140]	ENSMMUG00000000137	SNCB	synuclein beta [Source:HGNC Symbol;Acc:HGNC:11140]	Diploid	Diploid
ENSG00000055483	USP36	ubiquitin specific peptidase 36 [Source:HGNC Symbol;Acc:20062]	ENSMMUG00000005352	USP36	ubiquitin specific peptidase 36 [Source:HGNC Symbol;Acc:HGNC:20062]	Diploid	Diploid
ENSG00000161091	MFSD12	major facilitator superfamily domain containing 12 [Source:HGNC Symbol;Acc:28299]	ENSMMUG00000010653	MFSD12	major facilitator superfamily domain containing 12 [Source:HGNC Symbol;Acc:HGNC:28299]	Diploid	Diploid
ENSG00000133135	RNF128	ring finger protein 128, E3 ubiquitin protein ligase [Source:HGNC Symbol;Acc:21153]	ENSMMUG00000021412	RNF128	ring finger protein 128, E3 ubiquitin protein ligase [Source:HGNC Symbol;Acc:HGNC:21153]	Diploid	Diploid
ENSG00000188542	DUSP28	dual specificity phosphatase 28 [Source:HGNC Symbol;Acc:33237]	ENSMMUG00000037810	DUSP28	dual specificity phosphatase 28 [Source:HGNC Symbol;Acc:HGNC:33237]	Diploid	Diploid
ENSG00000151474	FRMD4A	FERM domain containing 4A [Source:HGNC Symbol;Acc:25491]	ENSMMUG00000017164	FRMD4A	FERM domain containing 4A [Source:HGNC Symbol;Acc:HGNC:25491]	Diploid	Diploid
ENSG00000127554	GFER	growth factor, augmenter of liver regeneration [Source:HGNC Symbol;Acc:4236]	ENSMMUG00000044559	GFER	growth factor, augmenter of liver regeneration [Source:HGNC Symbol;Acc:HGNC:4236]	Diploid	Diploid
ENSG00000023330	ALAS1	aminolevulinate, delta-, synthase 1 [Source:HGNC Symbol;Acc:396]	ENSMMUG00000005596	ALAS1	5'-aminolevulinate synthase 1 [Source:HGNC Symbol;Acc:HGNC:396]	Diploid	Diploid
ENSG00000164823	OSGIN2	oxidative stress induced growth inhibitor family member 2 [Source:HGNC Symbol;Acc:1355]	ENSMMUG00000014518	OSGIN2	oxidative stress induced growth inhibitor family member 2 [Source:HGNC Symbol;Acc:HGNC:1355]	Diploid	Diploid
ENSG00000105825	TFPI2	tissue factor pathway inhibitor 2 [Source:HGNC Symbol;Acc:11761]	ENSMMUG00000020581	TFPI2	tissue factor pathway inhibitor 2 [Source:HGNC Symbol;Acc:HGNC:11761]	Diploid	Diploid
ENSG00000127561	SYNGR3	synaptogyrin 3 [Source:HGNC Symbol;Acc:11501]	ENSMMUG00000007960	SYNGR3	synaptogyrin 3 [Source:HGNC Symbol;Acc:HGNC:11501]	Diploid	Diploid
ENSG00000136158	SPRY2	sprouty homolog 2 (Drosophila) [Source:HGNC Symbol;Acc:11270]	ENSMMUG00000018292	SPRY2	sprouty RTK signaling antagonist 2 [Source:HGNC Symbol;Acc:HGNC:11270]	Diploid	Diploid
ENSG00000164695	CHMP4C	charged multivesicular body protein 4C [Source:HGNC Symbol;Acc:30599]	ENSMMUG00000002625	CHMP4C	charged multivesicular body protein 4C [Source:HGNC Symbol;Acc:HGNC:30599]	Diploid	Diploid
ENSG00000176381	PRR18	proline rich 18 [Source:HGNC Symbol;Acc:28574]	ENSMMUG00000011700	PRR18	proline rich 18 [Source:HGNC Symbol;Acc:HGNC:28574]	Diploid	Diploid
ENSG00000198818	SFT2D1	SFT2 domain containing 1 [Source:HGNC Symbol;Acc:21102]	ENSMMUG00000011736	SFT2D1	SFT2 domain containing 1 [Source:HGNC Symbol;Acc:HGNC:21102]	Diploid	Diploid
ENSG00000121005	CRISPLD1	cysteine-rich secretory protein LCCL domain containing 1 [Source:HGNC Symbol;Acc:18206]	ENSMMUG00000011040	CRISPLD1	cysteine rich secretory protein LCCL domain containing 1 [Source:HGNC Symbol;Acc:HGNC:18206]	Diploid	Diploid
ENSG00000183751	TBL3	transducin (beta)-like 3 [Source:HGNC Symbol;Acc:11587]	ENSMMUG00000007943	TBL3	transducin beta like 3 [Source:HGNC Symbol;Acc:HGNC:11587]	Diploid	Diploid
ENSG00000136156	ITM2B	integral membrane protein 2B [Source:HGNC Symbol;Acc:6174]	ENSMMUG00000007888	ITM2B	integral membrane protein 2B [Source:HGNC Symbol;Acc:HGNC:6174]	Diploid	Diploid
ENSG00000152214	RIT2	Ras-like without CAAX 2 [Source:HGNC Symbol;Acc:10017]	ENSMMUG00000038452	RIT2	Ras like without CAAX 2 [Source:HGNC Symbol;Acc:HGNC:10017]	Diploid	Diploid
ENSG00000120533	ENY2	enhancer of yellow 2 homolog (Drosophila) [Source:HGNC Symbol;Acc:24449]	ENSMMUG00000045141			Diploid	Duplicated and fixed as a whole
ENSG00000105675	ATP4A	ATPase, H+/K+ exchanging, alpha polypeptide [Source:HGNC Symbol;Acc:819]	ENSMMUG00000000845	ATP4A	ATPase H+/K+ transporting alpha subunit [Source:HGNC Symbol;Acc:HGNC:819]	Diploid	Diploid
ENSG00000188316	ENO4	enolase family member 4 [Source:HGNC Symbol;Acc:31670]	ENSMMUG00000007575	ENO4	enolase family member 4 [Source:HGNC Symbol;Acc:HGNC:31670]	Diploid	Diploid
ENSG00000145604	SKP2	S-phase kinase-associated protein 2, E3 ubiquitin protein ligase [Source:HGNC Symbol;Acc:10901]	ENSMMUG00000015225	SKP2	S-phase kinase associated protein 2 [Source:HGNC Symbol;Acc:HGNC:10901]	Diploid	Diploid
ENSG00000079102	RUNX1T1	runt-related transcription factor 1; translocated to, 1 (cyclin D-related) [Source:HGNC Symbol;Acc:1535]	ENSMMUG00000023115	RUNX1T1	RUNX1 translocation partner 1 [Source:HGNC Symbol;Acc:HGNC:1535]	Diploid	Diploid
ENSG00000161652	IZUMO2	IZUMO family member 2 [Source:HGNC Symbol;Acc:28518]	ENSMMUG00000017065	IZUMO2	IZUMO family member 2 [Source:HGNC Symbol;Acc:HGNC:28518]	Diploid	Diploid
ENSG00000187164	KIAA1598	KIAA1598 [Source:HGNC Symbol;Acc:29319]	ENSMMUG00000007578	SHTN1	shootin 1 [Source:HGNC Symbol;Acc:HGNC:29319]	Diploid	Diploid
ENSG00000064687	ABCA7	ATP-binding cassette, sub-family A (ABC1), member 7 [Source:HGNC Symbol;Acc:37]	ENSMMUG00000015303	ABCA7	ATP binding cassette subfamily A member 7 [Source:HGNC Symbol;Acc:HGNC:37]	Diploid	Diploid
ENSG00000149212	SESN3	sestrin 3 [Source:HGNC Symbol;Acc:23060]	ENSMMUG00000009394	SESN3	sestrin 3 [Source:HGNC Symbol;Acc:HGNC:23060]	Diploid	Diploid
ENSG00000198739	LRRTM3	leucine rich repeat transmembrane neuronal 3 [Source:HGNC Symbol;Acc:19410]	ENSMMUG00000018766	LRRTM3	leucine rich repeat transmembrane neuronal 3 [Source:HGNC Symbol;Acc:HGNC:19410]	Diploid	Diploid
ENSG00000120526	NUDCD1	NudC domain containing 1 [Source:HGNC Symbol;Acc:24306]	ENSMMUG00000006103	NUDCD1	NudC domain containing 1 [Source:HGNC Symbol;Acc:HGNC:24306]	Diploid	Diploid
ENSG00000184939	ZFP90	ZFP90 zinc finger protein [Source:HGNC Symbol;Acc:23329]	ENSMMUG00000041138	ZFP90	ZFP90 zinc finger protein [Source:HGNC Symbol;Acc:HGNC:23329]	Diploid	Diploid
ENSG00000197070	ARRDC1	arrestin domain containing 1 [Source:HGNC Symbol;Acc:28633]	ENSMMUG00000019611	ARRDC1	arrestin domain containing 1 [Source:HGNC Symbol;Acc:HGNC:28633]	Diploid	Diploid
ENSG00000072210	ALDH3A2	aldehyde dehydrogenase 3 family, member A2 [Source:HGNC Symbol;Acc:403]	ENSMMUG00000014130	ALDH3A2	aldehyde dehydrogenase 3 family member A2 [Source:HGNC Symbol;Acc:HGNC:403]	Diploid	Diploid
ENSG00000183605	SFXN4	sideroflexin 4 [Source:HGNC Symbol;Acc:16088]	ENSMMUG00000008291	SFXN4	sideroflexin 4 [Source:HGNC Symbol;Acc:HGNC:16088]	Diploid	Diploid
ENSG00000173612	GPRC6A	G protein-coupled receptor, family C, group 6, member A [Source:HGNC Symbol;Acc:18510]	ENSMMUG00000003072	GPRC6A	G protein-coupled receptor class C group 6 member A [Source:HGNC Symbol;Acc:HGNC:18510]	Diploid	Diploid
ENSG00000132467	UTP3	UTP3, small subunit (SSU) processome component, homolog (S. cerevisiae) [Source:HGNC Symbol;Acc:24477]	ENSMMUG00000014229	UTP3	UTP3, small subunit processome component [Source:HGNC Symbol;Acc:HGNC:24477]	Diploid	Diploid
ENSG00000124334	IL9R	interleukin 9 receptor [Source:HGNC Symbol;Acc:6030]	ENSMMUG00000002016			Diploid	Diploid
ENSG00000147647	DPYS	dihydropyrimidinase [Source:HGNC Symbol;Acc:3013]	ENSMMUG00000010761	DPYS	dihydropyrimidinase [Source:HGNC Symbol;Acc:HGNC:3013]	Diploid	Diploid
ENSG00000172938	MRGPRD	MAS-related GPR, member D [Source:HGNC Symbol;Acc:29626]	ENSMMUG00000010129	MRGPRD	MAS related GPR family member D [Source:HGNC Symbol;Acc:HGNC:29626]	Diploid	Diploid
ENSG00000124391	IL17C	interleukin 17C [Source:HGNC Symbol;Acc:5983]	ENSMMUG00000014324	IL17C	interleukin 17C [Source:HGNC Symbol;Acc:HGNC:5983]	Diploid	Diploid
ENSG00000156453	PCDH1	protocadherin 1 [Source:HGNC Symbol;Acc:8655]	ENSMMUG00000008710	PCDH1	protocadherin 1 [Source:HGNC Symbol;Acc:HGNC:8655]	Diploid	Diploid
ENSG00000164935	DCSTAMP	dendrocyte expressed seven transmembrane protein [Source:HGNC Symbol;Acc:18549]	ENSMMUG00000010760	DCSTAMP	dendrocyte expressed seven transmembrane protein [Source:HGNC Symbol;Acc:HGNC:18549]	Diploid	Diploid
ENSG00000108924	HLF	hepatic leukemia factor [Source:HGNC Symbol;Acc:4977]	ENSMMUG00000022627	HLF	HLF, PAR bZIP transcription factor [Source:HGNC Symbol;Acc:HGNC:4977]	Diploid	Diploid
ENSG00000172935	MRGPRF	MAS-related GPR, member F [Source:HGNC Symbol;Acc:24828]	ENSMMUG00000047446	MRGPRF	MAS related GPR family member F [Source:HGNC Symbol;Acc:HGNC:24828]	Diploid	Diploid
ENSG00000169933	FRMPD4	FERM and PDZ domain containing 4 [Source:HGNC Symbol;Acc:29007]	ENSMMUG00000010252	FRMPD4	FERM and PDZ domain containing 4 [Source:HGNC Symbol;Acc:HGNC:29007]	Diploid	Diploid
ENSG00000185002	RFX6	regulatory factor X, 6 [Source:HGNC Symbol;Acc:21478]	ENSMMUG00000017189	RFX6	regulatory factor X6 [Source:HGNC Symbol;Acc:HGNC:21478]	Diploid	Diploid
ENSG00000141696	LEPREL4	leprecan-like 4 [Source:HGNC Symbol;Acc:16946]	ENSMMUG00000013051	LEPREL4	prolyl 3-hydroxylase family member 4 (non-enzymatic) [Source:HGNC Symbol;Acc:HGNC:16946]	Diploid	Diploid
ENSG00000135960	EDAR	ectodysplasin A receptor [Source:HGNC Symbol;Acc:2895]	ENSMMUG00000019574	EDAR	ectodysplasin A receptor [Source:HGNC Symbol;Acc:HGNC:2895]	Diploid	Diploid
ENSG00000051523	CYBA	cytochrome b-245, alpha polypeptide [Source:HGNC Symbol;Acc:2577]	ENSMMUG00000014325	CYBA	cytochrome b-245 alpha chain [Source:HGNC Symbol;Acc:HGNC:2577]	Diploid	Diploid
ENSG00000136942	RPL35	ribosomal protein L35 [Source:HGNC Symbol;Acc:10344]	ENSMMUG00000040585			Diploid	Diploid
ENSG00000065150	IPO5	importin 5 [Source:HGNC Symbol;Acc:6402]	ENSMMUG00000013531	IPO5	importin 5 [Source:HGNC Symbol;Acc:HGNC:6402]	Diploid	Diploid
ENSG00000148814	LRRC27	leucine rich repeat containing 27 [Source:HGNC Symbol;Acc:29346]	ENSMMUG00000022366	LRRC27	leucine rich repeat containing 27 [Source:HGNC Symbol;Acc:HGNC:29346]	Diploid	Diploid
ENSG00000137033	IL33	interleukin 33 [Source:HGNC Symbol;Acc:16028]	ENSMMUG00000021344	IL33	interleukin 33 [Source:HGNC Symbol;Acc:HGNC:16028]	Diploid	Diploid
ENSG00000105258	POLR2I	polymerase (RNA) II (DNA directed) polypeptide I, 14.5kDa [Source:HGNC Symbol;Acc:9196]	ENSMMUG00000000522	POLR2I	RNA polymerase II subunit I [Source:HGNC Symbol;Acc:HGNC:9196]	Diploid	Diploid
ENSG00000255501	CARD18	caspase recruitment domain family, member 18 [Source:HGNC Symbol;Acc:28861]	ENSMMUG00000021551	CARD18	caspase recruitment domain family member 18 [Source:HGNC Symbol;Acc:HGNC:28861]	Diploid	Diploid
ENSG00000115806	GORASP2	golgi reassembly stacking protein 2, 55kDa [Source:HGNC Symbol;Acc:17500]	ENSMMUG00000015203	GORASP2	golgi reassembly stacking protein 2 [Source:HGNC Symbol;Acc:HGNC:17500]	Diploid	Diploid
ENSG00000078295	ADCY2	adenylate cyclase 2 (brain) [Source:HGNC Symbol;Acc:233]	ENSMMUG00000018742	ADCY2	adenylate cyclase 2 [Source:HGNC Symbol;Acc:HGNC:233]	Diploid	Diploid
ENSG00000107341	UBE2R2	ubiquitin-conjugating enzyme E2R 2 [Source:HGNC Symbol;Acc:19907]	ENSMMUG00000044886	UBE2R2	ubiquitin conjugating enzyme E2 R2 [Source:HGNC Symbol;Acc:HGNC:19907]	Diploid	Diploid
ENSG00000091482	SMPX	small muscle protein, X-linked [Source:HGNC Symbol;Acc:11122]	ENSMMUG00000040290	SMPX	small muscle protein, X-linked [Source:HGNC Symbol;Acc:HGNC:11122]	Diploid	Diploid
ENSG00000068745	IP6K2	inositol hexakisphosphate kinase 2 [Source:HGNC Symbol;Acc:17313]	ENSMMUG00000014730	IP6K2	inositol hexakisphosphate kinase 2 [Source:HGNC Symbol;Acc:HGNC:17313]	Diploid	Diploid
ENSG00000158270	COLEC12	collectin sub-family member 12 [Source:HGNC Symbol;Acc:16016]	ENSMMUG00000004663	COLEC12	collectin subfamily member 12 [Source:HGNC Symbol;Acc:HGNC:16016]	Diploid	Diploid
ENSG00000182195	LDOC1	leucine zipper, down-regulated in cancer 1 [Source:HGNC Symbol;Acc:6548]	ENSMMUG00000000678	LDOC1	LDOC1, regulator of NFKB signaling [Source:HGNC Symbol;Acc:HGNC:6548]	Diploid	Diploid
ENSG00000023516	AKAP11	A kinase (PRKA) anchor protein 11 [Source:HGNC Symbol;Acc:369]	ENSMMUG00000023083	AKAP11	A-kinase anchoring protein 11 [Source:HGNC Symbol;Acc:HGNC:369]	Diploid	Diploid
ENSG00000165806	CASP7	caspase 7, apoptosis-related cysteine peptidase [Source:HGNC Symbol;Acc:1508]	ENSMMUG00000001217	CASP7	caspase 7 [Source:HGNC Symbol;Acc:HGNC:1508]	Diploid	Diploid
ENSG00000160563	MED27	mediator complex subunit 27 [Source:HGNC Symbol;Acc:2377]	ENSMMUG00000001727	MED27	mediator complex subunit 27 [Source:HGNC Symbol;Acc:HGNC:2377]	Diploid	Diploid
ENSG00000112685	EXOC2	exocyst complex component 2 [Source:HGNC Symbol;Acc:24968]	ENSMMUG00000023558	EXOC2	exocyst complex component 2 [Source:RefSeq peptide;Acc:NP_001253873]	Diploid	Diploid
ENSG00000168675	LDLRAD4	low density lipoprotein receptor class A domain containing 4 [Source:HGNC Symbol;Acc:1224]	ENSMMUG00000004032	C18orf1	low density lipoprotein receptor class A domain containing 4 [Source:RefSeq peptide;Acc:NP_001253588]	Diploid	Diploid
ENSG00000247596	TWF2	twinfilin actin-binding protein 2 [Source:HGNC Symbol;Acc:9621]	ENSMMUG00000047685	TWF2	twinfilin actin binding protein 2 [Source:HGNC Symbol;Acc:HGNC:9621]	Diploid	Diploid
ENSG00000146453	PNLDC1	poly(A)-specific ribonuclease (PARN)-like domain containing 1 [Source:HGNC Symbol;Acc:21185]	ENSMMUG00000004181	PNLDC1	PARN like, ribonuclease domain containing 1 [Source:HGNC Symbol;Acc:HGNC:21185]	Diploid	Diploid
ENSG00000133138	TBC1D8B	TBC1 domain family, member 8B (with GRAM domain) [Source:HGNC Symbol;Acc:24715]	ENSMMUG00000021413	TBC1D8B	TBC1 domain family member 8B [Source:HGNC Symbol;Acc:HGNC:24715]	Diploid	Diploid
ENSG00000134909	ARHGAP32	Rho GTPase activating protein 32 [Source:HGNC Symbol;Acc:17399]	ENSMMUG00000002963	ARHGAP32	Rho GTPase activating protein 32 [Source:HGNC Symbol;Acc:HGNC:17399]	Diploid	Diploid
ENSG00000149480	MTA2	metastasis associated 1 family, member 2 [Source:HGNC Symbol;Acc:7411]	ENSMMUG00000018110	MTA2	metastasis-associated protein MTA2 [Source:RefSeq peptide;Acc:NP_001252990]	Diploid	Diploid
ENSG00000164327	RICTOR	RPTOR independent companion of MTOR, complex 2 [Source:HGNC Symbol;Acc:28611]	ENSMMUG00000001611	RICTOR	RPTOR independent companion of MTOR complex 2 [Source:HGNC Symbol;Acc:HGNC:28611]	Diploid	Diploid
ENSG00000117115	PADI2	peptidyl arginine deiminase, type II [Source:HGNC Symbol;Acc:18341]	ENSMMUG00000001616	PADI2	peptidyl arginine deiminase 2 [Source:HGNC Symbol;Acc:HGNC:18341]	Diploid	Diploid
ENSG00000214530	STARD10	StAR-related lipid transfer (START) domain containing 10 [Source:HGNC Symbol;Acc:10666]	ENSMMUG00000039301	STARD10	StAR related lipid transfer domain containing 10 [Source:HGNC Symbol;Acc:HGNC:10666]	Diploid	Diploid
ENSG00000169607	CKAP2L	cytoskeleton associated protein 2-like [Source:HGNC Symbol;Acc:26877]	ENSMMUG00000019773	CKAP2L	cytoskeleton associated protein 2 like [Source:HGNC Symbol;Acc:HGNC:26877]	Diploid	Diploid
ENSG00000097021	ACOT7	acyl-CoA thioesterase 7 [Source:HGNC Symbol;Acc:24157]	ENSMMUG00000015201			Diploid	Diploid
ENSG00000147223	RIPPLY1	ripply transcriptional repressor 1 [Source:HGNC Symbol;Acc:25117]	ENSMMUG00000021414	RIPPLY1	ripply transcriptional repressor 1 [Source:HGNC Symbol;Acc:HGNC:25117]	Diploid	Diploid
ENSG00000133131	MORC4	MORC family CW-type zinc finger 4 [Source:HGNC Symbol;Acc:23485]	ENSMMUG00000013150	MORC4	MORC family CW-type zinc finger protein 4 [Source:RefSeq peptide;Acc:NP_001253383]	Diploid	Diploid
ENSG00000144130	NT5DC4	5'-nucleotidase domain containing 4 [Source:HGNC Symbol;Acc:27678]	ENSMMUG00000019770	NT5DC4	5'-nucleotidase domain containing 4 [Source:HGNC Symbol;Acc:HGNC:27678]	Diploid	Diploid
ENSG00000140092	FBLN5	fibulin 5 [Source:HGNC Symbol;Acc:3602]	ENSMMUG00000008447	FBLN5	fibulin-5 precursor [Source:RefSeq peptide;Acc:NP_001247463]	Diploid	Diploid
ENSG00000084674	APOB	apolipoprotein B [Source:HGNC Symbol;Acc:603]	ENSMMUG00000007692	APOB	apolipoprotein B [Source:HGNC Symbol;Acc:HGNC:603]	Diploid	Diploid
ENSG00000182919	C11orf54	chromosome 11 open reading frame 54 [Source:HGNC Symbol;Acc:30204]	ENSMMUG00000011649	C11orf54	chromosome 11 open reading frame 54 [Source:HGNC Symbol;Acc:HGNC:30204]	Diploid	Diploid
ENSG00000132872	SYT4	synaptotagmin IV [Source:HGNC Symbol;Acc:11512]	ENSMMUG00000017016	SYT4	synaptotagmin 4 [Source:HGNC Symbol;Acc:HGNC:11512]	Diploid	Diploid
ENSG00000170162	VGLL2	vestigial like 2 (Drosophila) [Source:HGNC Symbol;Acc:20232]	ENSMMUG00000023737	VGLL2	vestigial like family member 2 [Source:HGNC Symbol;Acc:HGNC:20232]	Diploid	Diploid
ENSG00000165376	CLDN2	claudin 2 [Source:HGNC Symbol;Acc:2041]	ENSMMUG00000013146	CLDN2	claudin 2 [Source:HGNC Symbol;Acc:HGNC:2041]	Diploid	Diploid
ENSG00000068615	REEP1	receptor accessory protein 1 [Source:HGNC Symbol;Acc:25786]	ENSMMUG00000020930	REEP1	receptor accessory protein 1 [Source:HGNC Symbol;Acc:HGNC:25786]	Diploid	Diploid
ENSG00000160087	UBE2J2	ubiquitin-conjugating enzyme E2, J2 [Source:HGNC Symbol;Acc:19268]	ENSMMUG00000010030	UBE2J2	ubiquitin conjugating enzyme E2 J2 [Source:HGNC Symbol;Acc:HGNC:19268]	Diploid	Diploid
ENSG00000082458	DLG3	discs, large homolog 3 (Drosophila) [Source:HGNC Symbol;Acc:2902]	ENSMMUG00000013948	DLG3	discs large MAGUK scaffold protein 3 [Source:HGNC Symbol;Acc:HGNC:2902]	Diploid	Diploid
ENSG00000148346	LCN2	lipocalin 2 [Source:HGNC Symbol;Acc:6526]	ENSMMUG00000023801	LCN2	lipocalin 2 [Source:HGNC Symbol;Acc:HGNC:6526]	Diploid	Diploid
ENSG00000108352	RAPGEFL1	Rap guanine nucleotide exchange factor (GEF)-like 1 [Source:HGNC Symbol;Acc:17428]	ENSMMUG00000015160	RAPGEFL1	Rap guanine nucleotide exchange factor like 1 [Source:HGNC Symbol;Acc:HGNC:17428]	Diploid	Diploid
ENSG00000180104	EXOC3	exocyst complex component 3 [Source:HGNC Symbol;Acc:30378]	ENSMMUG00000003787	EXOC3	exocyst complex component 3 [Source:RefSeq peptide;Acc:NP_001247585]	Diploid	Diploid
ENSG00000108849	PPY	pancreatic polypeptide [Source:HGNC Symbol;Acc:9327]	ENSMMUG00000003206	PPY	pancreatic polypeptide [Source:HGNC Symbol;Acc:HGNC:9327]	Diploid	Diploid
ENSG00000204889	KRT40	keratin 40 [Source:HGNC Symbol;Acc:26707]	ENSMMUG00000001142	KRT40	keratin 40 [Source:HGNC Symbol;Acc:HGNC:26707]	Diploid	Diploid
ENSG00000023734	STRAP	serine/threonine kinase receptor associated protein [Source:HGNC Symbol;Acc:30796]	ENSMMUG00000013307	STRAP	serine/threonine kinase receptor associated protein [Source:HGNC Symbol;Acc:HGNC:30796]	Diploid	Diploid
ENSG00000111206	FOXM1	forkhead box M1 [Source:HGNC Symbol;Acc:3818]	ENSMMUG00000019385	FOXM1	forkhead box M1 [Source:HGNC Symbol;Acc:HGNC:3818]	Diploid	Diploid
ENSG00000105851	PIK3CG	phosphatidylinositol-4,5-bisphosphate 3-kinase, catalytic subunit gamma [Source:HGNC Symbol;Acc:8978]	ENSMMUG00000011385	PIK3CG	phosphatidylinositol-4,5-bisphosphate 3-kinase catalytic subunit gamma [Source:HGNC Symbol;Acc:HGNC:8978]	Diploid	Diploid
ENSG00000224420	ADM5	adrenomedullin 5 (putative) [Source:HGNC Symbol;Acc:27293]	ENSMMUG00000038407	ADM5	adrenomedullin 5 (putative) [Source:HGNC Symbol;Acc:HGNC:27293]	Diploid	Diploid
ENSG00000140853	NLRC5	NLR family, CARD domain containing 5 [Source:HGNC Symbol;Acc:29933]	ENSMMUG00000000769	NLRC5	NLR family CARD domain containing 5 [Source:HGNC Symbol;Acc:HGNC:29933]	Diploid	Diploid
ENSG00000132361	CLUH	clustered mitochondria (cluA/CLU1) homolog [Source:HGNC Symbol;Acc:29094]	ENSMMUG00000020527	CLUH	clustered mitochondria homolog [Source:HGNC Symbol;Acc:HGNC:29094]	Diploid	Diploid
ENSG00000166396	SERPINB7	serpin peptidase inhibitor, clade B (ovalbumin), member 7 [Source:HGNC Symbol;Acc:13902]	ENSMMUG00000016615	SERPINB7	serpin family B member 7 [Source:HGNC Symbol;Acc:HGNC:13902]	Diploid	Diploid
ENSG00000130234	ACE2	angiotensin I converting enzyme 2 [Source:HGNC Symbol;Acc:13557]	ENSMMUG00000014048	ACE2	angiotensin I converting enzyme 2 [Source:HGNC Symbol;Acc:HGNC:13557]	Diploid	Diploid
ENSG00000136950	ARPC5L	actin related protein 2/3 complex, subunit 5-like [Source:HGNC Symbol;Acc:23366]	ENSMMUG00000043892	ARPC5L	actin related protein 2/3 complex subunit 5 like [Source:HGNC Symbol;Acc:HGNC:23366]	Diploid	Diploid
ENSG00000155833	CYLC2	cylicin, basic protein of sperm head cytoskeleton 2 [Source:HGNC Symbol;Acc:2583]	ENSMMUG00000015205	CYLC2	cylicin 2 [Source:HGNC Symbol;Acc:HGNC:2583]	Diploid	Diploid
ENSG00000178235	SLITRK1	SLIT and NTRK-like family, member 1 [Source:HGNC Symbol;Acc:20297]	ENSMMUG00000003715	SLITRK1	SLIT and NTRK like family member 1 [Source:HGNC Symbol;Acc:HGNC:20297]	Diploid	Diploid
ENSG00000183578	TNFAIP8L3	tumor necrosis factor, alpha-induced protein 8-like 3 [Source:HGNC Symbol;Acc:20620]	ENSMMUG00000001388	TNFAIP8L3	TNF alpha induced protein 8 like 3 [Source:HGNC Symbol;Acc:HGNC:20620]	Diploid	Diploid
ENSG00000144355	DLX1	distal-less homeobox 1 [Source:HGNC Symbol;Acc:2914]	ENSMMUG00000048041	DLX1	distal-less homeobox 1 [Source:HGNC Symbol;Acc:HGNC:2914]	Diploid	Diploid
ENSG00000198105	ZNF248	zinc finger protein 248 [Source:HGNC Symbol;Acc:13041]	ENSMMUG00000010741	ZNF248	zinc finger protein 248 [Source:HGNC Symbol;Acc:HGNC:13041]	Diploid	Diploid
ENSG00000137869	CYP19A1	cytochrome P450, family 19, subfamily A, polypeptide 1 [Source:HGNC Symbol;Acc:2594]	ENSMMUG00000002553	CYP19A1	cytochrome P450 family 19 subfamily A member 1 [Source:HGNC Symbol;Acc:HGNC:2594]	Diploid	Diploid
ENSG00000058600	POLR3E	polymerase (RNA) III (DNA directed) polypeptide E (80kD) [Source:HGNC Symbol;Acc:30347]	ENSMMUG00000002257	POLR3E	RNA polymerase III subunit E [Source:HGNC Symbol;Acc:HGNC:30347]	Diploid	Diploid
ENSG00000197562	RAB40C	RAB40C, member RAS oncogene family [Source:HGNC Symbol;Acc:18285]	ENSMMUG00000038629	RAB40C	RAB40C, member RAS oncogene family [Source:HGNC Symbol;Acc:HGNC:18285]	Diploid	Diploid
ENSG00000145623	OSMR	oncostatin M receptor [Source:HGNC Symbol;Acc:8507]	ENSMMUG00000001609	OSMR	oncostatin M receptor [Source:HGNC Symbol;Acc:HGNC:8507]	Diploid	Diploid
ENSG00000187824	TMEM220	transmembrane protein 220 [Source:HGNC Symbol;Acc:33757]	ENSMMUG00000004872	TMEM220	transmembrane protein 220 [Source:HGNC Symbol;Acc:HGNC:33757]	Diploid	Diploid
ENSG00000136243	NUPL2	nucleoporin like 2 [Source:HGNC Symbol;Acc:17010]	ENSMMUG00000001560	NUPL2	nucleoporin like 2 [Source:HGNC Symbol;Acc:HGNC:17010]	Diploid	Diploid
ENSG00000085872	CHERP	calcium homeostasis endoplasmic reticulum protein [Source:HGNC Symbol;Acc:16930]	ENSMMUG00000012958	CHERP	calcium homeostasis endoplasmic reticulum protein [Source:HGNC Symbol;Acc:HGNC:16930]	Diploid	Diploid
ENSG00000059728	MXD1	MAX dimerization protein 1 [Source:HGNC Symbol;Acc:6761]	ENSMMUG00000041817	MXD1	MAX dimerization protein 1 [Source:HGNC Symbol;Acc:HGNC:6761]	Diploid	Diploid
ENSG00000015676	NUDCD3	NudC domain containing 3 [Source:HGNC Symbol;Acc:22208]	ENSMMUG00000000779	NUDCD3	NudC domain containing 3 [Source:HGNC Symbol;Acc:HGNC:22208]	Diploid	Diploid
ENSG00000213809	KLRK1	killer cell lectin-like receptor subfamily K, member 1 [Source:HGNC Symbol;Acc:18788]	ENSMMUG00000018305	NKG2D	killer cell lectin like receptor K1 [Source:HGNC Symbol;Acc:HGNC:18788]	Diploid	Diploid
ENSG00000181649	PHLDA2	pleckstrin homology-like domain, family A, member 2 [Source:HGNC Symbol;Acc:12385]	ENSMMUG00000007752	PHLDA2	pleckstrin homology like domain family A member 2 [Source:HGNC Symbol;Acc:HGNC:12385]	Diploid	Diploid
ENSG00000088756	ARHGAP28	Rho GTPase activating protein 28 [Source:HGNC Symbol;Acc:25509]	ENSMMUG00000014506	ARHGAP28	Rho GTPase activating protein 28 [Source:HGNC Symbol;Acc:HGNC:25509]	Diploid	Diploid
ENSG00000172985	SH3RF3	SH3 domain containing ring finger 3 [Source:HGNC Symbol;Acc:24699]	ENSMMUG00000017175	SH3RF3	SH3 domain containing ring finger 3 [Source:HGNC Symbol;Acc:HGNC:24699]	Diploid	Diploid
ENSG00000177143	CETN1	centrin, EF-hand protein, 1 [Source:HGNC Symbol;Acc:1866]	ENSMMUG00000012130	CETN1	centrin 1 [Source:HGNC Symbol;Acc:HGNC:1866]	Diploid	Diploid
ENSG00000127578	WFIKKN1	WAP, follistatin/kazal, immunoglobulin, kunitz and netrin domain containing 1 [Source:HGNC Symbol;Acc:30912]	ENSMMUG00000021967	WFIKKN1	WAP, follistatin/kazal, immunoglobulin, kunitz and netrin domain containing 1 [Source:HGNC Symbol;Acc:HGNC:30912]	Diploid	Diploid
ENSG00000197170	PSMD12	proteasome (prosome, macropain) 26S subunit, non-ATPase, 12 [Source:HGNC Symbol;Acc:9557]	ENSMMUG00000002132	PSMD12	proteasome 26S subunit, non-ATPase 12 [Source:HGNC Symbol;Acc:HGNC:9557]	Diploid	Diploid
ENSG00000166833	NAV2	neuron navigator 2 [Source:HGNC Symbol;Acc:15997]	ENSMMUG00000016942	NAV2	neuron navigator 2 [Source:HGNC Symbol;Acc:HGNC:15997]	Diploid	Diploid
ENSG00000183654	MARCH11	membrane-associated ring finger (C3HC4) 11 [Source:HGNC Symbol;Acc:33609]	ENSMMUG00000007069	MARCH11	membrane associated ring-CH-type finger 11 [Source:HGNC Symbol;Acc:HGNC:33609]	Diploid	Diploid
ENSG00000081791	KIAA0141	KIAA0141 [Source:HGNC Symbol;Acc:28969]	ENSMMUG00000006287	KIAA0141	death ligand signal enhancer [Source:RefSeq peptide;Acc:NP_001180835]	Diploid	Diploid
ENSG00000171813	PWWP2B	PWWP domain containing 2B [Source:HGNC Symbol;Acc:25150]	ENSMMUG00000021582	PWWP2B	PWWP domain containing 2B [Source:HGNC Symbol;Acc:HGNC:25150]	Diploid	Diploid
ENSG00000189292	FAM150B	family with sequence similarity 150, member B [Source:HGNC Symbol;Acc:27683]	ENSMMUG00000017098	ALKAL2	ALK and LTK ligand 2 [Source:HGNC Symbol;Acc:HGNC:27683]	Diploid	Diploid
ENSG00000166341	DCHS1	dachsous cadherin-related 1 [Source:HGNC Symbol;Acc:13681]	ENSMMUG00000007754	DCHS1	dachsous cadherin-related 1 [Source:HGNC Symbol;Acc:HGNC:13681]	Diploid	Diploid
ENSG00000233670	PIRT	phosphoinositide-interacting regulator of transient receptor potential channels [Source:HGNC Symbol;Acc:37239]	ENSMMUG00000041876	PIRT	phosphoinositide interacting regulator of transient receptor potential channels [Source:HGNC Symbol;Acc:HGNC:37239]	Diploid	Diploid
ENSG00000135723	FHOD1	formin homology 2 domain containing 1 [Source:HGNC Symbol;Acc:17905]	ENSMMUG00000018111	FHOD1	formin homology 2 domain containing 1 [Source:HGNC Symbol;Acc:HGNC:17905]	Diploid	Diploid
ENSG00000197279	ZNF165	zinc finger protein 165 [Source:HGNC Symbol;Acc:12953]	ENSMMUG00000020831	ZNF165	zinc finger protein 165 [Source:HGNC Symbol;Acc:HGNC:12953]	Diploid	Diploid
ENSG00000104863	LIN7B	lin-7 homolog B (C. elegans) [Source:HGNC Symbol;Acc:17788]	ENSMMUG00000028734	LIN7B	lin-7 homolog B, crumbs cell polarity complex component [Source:HGNC Symbol;Acc:HGNC:17788]	Diploid	Diploid
ENSG00000172059	KLF11	Kruppel-like factor 11 [Source:HGNC Symbol;Acc:11811]	ENSMMUG00000002054	KLF11	Kruppel like factor 11 [Source:HGNC Symbol;Acc:HGNC:11811]	Diploid	Diploid
ENSG00000160951	PTGER1	prostaglandin E receptor 1 (subtype EP1), 42kDa [Source:HGNC Symbol;Acc:9593]	ENSMMUG00000005728	PTGER1	prostaglandin E receptor 1 [Source:HGNC Symbol;Acc:HGNC:9593]	Diploid	Diploid
ENSG00000071626	DAZAP1	DAZ associated protein 1 [Source:HGNC Symbol;Acc:2683]	ENSMMUG00000003047	DAZAP1	DAZ associated protein 1 [Source:HGNC Symbol;Acc:HGNC:2683]	Diploid	Diploid
ENSG00000166167	BTRC	beta-transducin repeat containing E3 ubiquitin protein ligase [Source:HGNC Symbol;Acc:1144]	ENSMMUG00000006741	BTRC	beta-transducin repeat containing E3 ubiquitin protein ligase [Source:HGNC Symbol;Acc:HGNC:1144]	Diploid	Diploid
ENSG00000105072	C19orf44	chromosome 19 open reading frame 44 [Source:HGNC Symbol;Acc:26141]	ENSMMUG00000028852	C19orf44	chromosome 19 open reading frame 44 [Source:HGNC Symbol;Acc:HGNC:26141]	Diploid	Diploid
ENSG00000185507	IRF7	interferon regulatory factor 7 [Source:HGNC Symbol;Acc:6122]	ENSMMUG00000004014	IRF7	interferon regulatory factor 7 [Source:HGNC Symbol;Acc:HGNC:6122]	Diploid	Diploid
ENSG00000110011	DNAJC4	DnaJ (Hsp40) homolog, subfamily C, member 4 [Source:HGNC Symbol;Acc:5271]	ENSMMUG00000012942	DNAJC4	dnaJ homolog subfamily C member 4 [Source:RefSeq peptide;Acc:NP_001244549]	Diploid	Diploid
ENSG00000149091	DGKZ	diacylglycerol kinase, zeta [Source:HGNC Symbol;Acc:2857]	ENSMMUG00000021446	DGKZ	diacylglycerol kinase zeta [Source:HGNC Symbol;Acc:HGNC:2857]	Diploid	Diploid
ENSG00000167972	ABCA3	ATP-binding cassette, sub-family A (ABC1), member 3 [Source:HGNC Symbol;Acc:33]	ENSMMUG00000019242	ABCA3	ATP binding cassette subfamily A member 3 [Source:HGNC Symbol;Acc:HGNC:33]	Diploid	Diploid
ENSG00000172543	CTSW	cathepsin W [Source:HGNC Symbol;Acc:2546]	ENSMMUG00000008649	CTSW	cathepsin W [Source:HGNC Symbol;Acc:HGNC:2546]	Diploid	Diploid
ENSG00000127920	GNG11	guanine nucleotide binding protein (G protein), gamma 11 [Source:HGNC Symbol;Acc:4403]	ENSMMUG00000041616	GNG11	G protein subunit gamma 11 [Source:HGNC Symbol;Acc:HGNC:4403]	Diploid	Diploid
ENSG00000168298	HIST1H1E	histone cluster 1, H1e [Source:HGNC Symbol;Acc:4718]	ENSMMUG00000023748	HIST1H1E	histone cluster 1 H1 family member e [Source:HGNC Symbol;Acc:HGNC:4718]	Diploid	Diploid
ENSG00000126457	PRMT1	protein arginine methyltransferase 1 [Source:HGNC Symbol;Acc:5187]	ENSMMUG00000003029	PRMT1	protein arginine methyltransferase 1 [Source:HGNC Symbol;Acc:HGNC:5187]	Diploid	Diploid
ENSG00000091656	ZFHX4	zinc finger homeobox 4 [Source:HGNC Symbol;Acc:30939]	ENSMMUG00000019414	ZFHX4	zinc finger homeobox 4 [Source:HGNC Symbol;Acc:HGNC:30939]	Diploid	Diploid
ENSG00000149761	NUDT22	nudix (nucleoside diphosphate linked moiety X)-type motif 22 [Source:HGNC Symbol;Acc:28189]	ENSMMUG00000012941	NUDT22	nudix hydrolase 22 [Source:HGNC Symbol;Acc:HGNC:28189]	Diploid	Diploid
ENSG00000169814	BTD	biotinidase [Source:HGNC Symbol;Acc:1122]	ENSMMUG00000020762	BTD	biotinidase [Source:HGNC Symbol;Acc:HGNC:1122]	Diploid	Diploid
ENSG00000089505	CMTM1	CKLF-like MARVEL transmembrane domain containing 1 [Source:HGNC Symbol;Acc:19172]	ENSMMUG00000029108	CMTM1	CKLF like MARVEL transmembrane domain containing 1 [Source:HGNC Symbol;Acc:HGNC:19172]	Diploid	Diploid
ENSG00000161981	SNRNP25	small nuclear ribonucleoprotein 25kDa (U11/U12) [Source:HGNC Symbol;Acc:14161]	ENSMMUG00000047475	SNRNP25	small nuclear ribonucleoprotein U11/U12 subunit 25 [Source:HGNC Symbol;Acc:HGNC:14161]	Diploid	Diploid
ENSG00000173567	GPR113	G protein-coupled receptor 113 [Source:HGNC Symbol;Acc:18989]	ENSMMUG00000004383	ADGRF3	adhesion G protein-coupled receptor F3 [Source:HGNC Symbol;Acc:HGNC:18989]	Diploid	Diploid
ENSG00000160161	CILP2	cartilage intermediate layer protein 2 [Source:HGNC Symbol;Acc:24213]	ENSMMUG00000011352	CILP2	cartilage intermediate layer protein 2 [Source:HGNC Symbol;Acc:HGNC:24213]	Diploid	Diploid
ENSG00000148735	PLEKHS1	pleckstrin homology domain containing, family S member 1 [Source:HGNC Symbol;Acc:26285]	ENSMMUG00000001218	PLEKHS1	pleckstrin homology domain containing S1 [Source:HGNC Symbol;Acc:HGNC:26285]	Diploid	Diploid
ENSG00000172500	FIBP	fibroblast growth factor (acidic) intracellular binding protein [Source:HGNC Symbol;Acc:3705]	ENSMMUG00000008651	FIBP	FGF1 intracellular binding protein [Source:HGNC Symbol;Acc:HGNC:3705]	Diploid	Diploid
ENSG00000143994	ABHD1	abhydrolase domain containing 1 [Source:HGNC Symbol;Acc:17553]	ENSMMUG00000002388	ABHD1	abhydrolase domain containing 1 [Source:HGNC Symbol;Acc:HGNC:17553]	Diploid	Diploid
ENSG00000102057	KCND1	potassium voltage-gated channel, Shal-related subfamily, member 1 [Source:HGNC Symbol;Acc:6237]	ENSMMUG00000004559	KCND1	potassium voltage-gated channel subfamily D member 1 [Source:HGNC Symbol;Acc:HGNC:6237]	Diploid	Diploid
ENSG00000145703	IQGAP2	IQ motif containing GTPase activating protein 2 [Source:HGNC Symbol;Acc:6111]	ENSMMUG00000022982	IQGAP2	IQ motif containing GTPase activating protein 2 [Source:HGNC Symbol;Acc:HGNC:6111]	Diploid	Diploid
ENSG00000120659	TNFSF11	tumor necrosis factor (ligand) superfamily, member 11 [Source:HGNC Symbol;Acc:11926]	ENSMMUG00000017876	TNFSF11	TNF superfamily member 11 [Source:HGNC Symbol;Acc:HGNC:11926]	Diploid	Diploid
ENSG00000142102	ATHL1	ATH1, acid trehalase-like 1 (yeast) [Source:HGNC Symbol;Acc:26210]	ENSMMUG00000004625	PGGHG	protein-glucosylgalactosylhydroxylysine glucosidase [Source:HGNC Symbol;Acc:HGNC:26210]	Diploid	Diploid
ENSG00000176890	TYMS	thymidylate synthetase [Source:HGNC Symbol;Acc:12441]	ENSMMUG00000004046	TYMS	thymidylate synthetase [Source:HGNC Symbol;Acc:HGNC:12441]	Diploid	Diploid
ENSG00000249115	HAUS5	HAUS augmin-like complex, subunit 5 [Source:HGNC Symbol;Acc:29130]	ENSMMUG00000021395	HAUS5	HAUS augmin like complex subunit 5 [Source:HGNC Symbol;Acc:HGNC:29130]	Diploid	Diploid
ENSG00000134757	DSG3	desmoglein 3 [Source:HGNC Symbol;Acc:3050]	ENSMMUG00000021094	DSG3	desmoglein 3 [Source:HGNC Symbol;Acc:HGNC:3050]	Diploid	Diploid
ENSG00000147003	TMEM27	transmembrane protein 27 [Source:HGNC Symbol;Acc:29437]	ENSMMUG00000043609	TMEM27	transmembrane protein 27 [Source:HGNC Symbol;Acc:HGNC:29437]	Diploid	Diploid
ENSG00000188493	C19orf54	chromosome 19 open reading frame 54 [Source:HGNC Symbol;Acc:24758]	ENSMMUG00000017708	C19orf54	chromosome 19 open reading frame 54 [Source:HGNC Symbol;Acc:HGNC:24758]	Diploid	Diploid
ENSG00000125510	OPRL1	opiate receptor-like 1 [Source:HGNC Symbol;Acc:8155]	ENSMMUG00000043739	OPRL1	opioid related nociceptin receptor 1 [Source:HGNC Symbol;Acc:HGNC:8155]	Diploid	Diploid
ENSG00000100523	DDHD1	DDHD domain containing 1 [Source:HGNC Symbol;Acc:19714]	ENSMMUG00000014197	DDHD1	DDHD domain containing 1 [Source:HGNC Symbol;Acc:HGNC:19714]	Diploid	Diploid
ENSG00000197409	HIST1H3D	histone cluster 1, H3d [Source:HGNC Symbol;Acc:4767]	ENSMMUG00000042975			Diploid	Diploid
ENSG00000165509	MAGEC3	melanoma antigen family C, 3 [Source:HGNC Symbol;Acc:23798]	ENSMMUG00000017517			Diploid	Diploid
ENSG00000124786	SLC35B3	solute carrier family 35 (adenosine 3'-phospho 5'-phosphosulfate transporter), member B3 [Source:HGNC Symbol;Acc:21601]	ENSMMUG00000010672	SLC35B3	solute carrier family 35 member B3 [Source:HGNC Symbol;Acc:HGNC:21601]	Diploid	Diploid
ENSG00000171695	C20orf201	chromosome 20 open reading frame 201 [Source:HGNC Symbol;Acc:33718]	ENSMMUG00000018876	LKAAEAR1	LKAAEAR motif containing 1 [Source:HGNC Symbol;Acc:HGNC:33718]	Diploid	Diploid
ENSG00000120053	GOT1	glutamic-oxaloacetic transaminase 1, soluble [Source:HGNC Symbol;Acc:4432]	ENSMMUG00000010356	GOT1	glutamic-oxaloacetic transaminase 1 [Source:HGNC Symbol;Acc:HGNC:4432]	Diploid	Diploid
ENSG00000011451	WIZ	widely interspaced zinc finger motifs [Source:HGNC Symbol;Acc:30917]	ENSMMUG00000028863	WIZ	widely interspaced zinc finger motifs [Source:HGNC Symbol;Acc:HGNC:30917]	Diploid	Diploid
ENSG00000165757	KIAA1462	KIAA1462 [Source:HGNC Symbol;Acc:29283]	ENSMMUG00000021559	JCAD	junctional cadherin 5 associated [Source:HGNC Symbol;Acc:HGNC:29283]	Diploid	Diploid
ENSG00000105829	BET1	Bet1 golgi vesicular membrane trafficking protein [Source:HGNC Symbol;Acc:14562]	ENSMMUG00000000007	BET1	Bet1 golgi vesicular membrane trafficking protein [Source:HGNC Symbol;Acc:HGNC:14562]	Diploid	Diploid
ENSG00000165449	SLC16A9	solute carrier family 16, member 9 [Source:HGNC Symbol;Acc:23520]	ENSMMUG00000008911	SLC16A9	solute carrier family 16 member 9 [Source:HGNC Symbol;Acc:HGNC:23520]	Diploid	Diploid
ENSG00000205531	NAP1L4	nucleosome assembly protein 1-like 4 [Source:HGNC Symbol;Acc:7640]	ENSMMUG00000007753	NAP1L4	nucleosome assembly protein 1 like 4 [Source:HGNC Symbol;Acc:HGNC:7640]	Diploid	Diploid
ENSG00000124217	MOCS3	molybdenum cofactor synthesis 3 [Source:HGNC Symbol;Acc:15765]	ENSMMUG00000002758	MOCS3	molybdenum cofactor synthesis 3 [Source:HGNC Symbol;Acc:HGNC:15765]	Diploid	Diploid
ENSG00000157111	TMEM171	transmembrane protein 171 [Source:HGNC Symbol;Acc:27031]	ENSMMUG00000015433	TMEM171	transmembrane protein 171 [Source:HGNC Symbol;Acc:HGNC:27031]	Diploid	Diploid
ENSG00000169508	GPR183	G protein-coupled receptor 183 [Source:HGNC Symbol;Acc:3128]	ENSMMUG00000012338	GPR183	G protein-coupled receptor 183 [Source:HGNC Symbol;Acc:HGNC:3128]	Diploid	Diploid
ENSG00000100626	GALNT16	UDP-N-acetyl-alpha-D-galactosamine:polypeptide N-acetylgalactosaminyltransferase 16 [Source:HGNC Symbol;Acc:23233]	ENSMMUG00000020516	GALNT16	polypeptide N-acetylgalactosaminyltransferase 16 [Source:HGNC Symbol;Acc:HGNC:23233]	Diploid	Diploid
ENSG00000129195	FAM64A	family with sequence similarity 64, member A [Source:HGNC Symbol;Acc:25483]	ENSMMUG00000017760	PIMREG	PICALM interacting mitotic regulator [Source:HGNC Symbol;Acc:HGNC:25483]	Diploid	Diploid
ENSG00000125245	GPR18	G protein-coupled receptor 18 [Source:HGNC Symbol;Acc:4472]	ENSMMUG00000012336	GPR18	G protein-coupled receptor 18 [Source:HGNC Symbol;Acc:HGNC:4472]	Diploid	Diploid
ENSG00000134882	UBAC2	UBA domain containing 2 [Source:HGNC Symbol;Acc:20486]	ENSMMUG00000012332	UBAC2	UBA domain containing 2 [Source:HGNC Symbol;Acc:HGNC:20486]	Diploid	Diploid
ENSG00000105855	ITGB8	integrin, beta 8 [Source:HGNC Symbol;Acc:6163]	ENSMMUG00000006898	ITGB8	integrin subunit beta 8 [Source:HGNC Symbol;Acc:HGNC:6163]	Diploid	Diploid
ENSG00000054148	PHPT1	phosphohistidine phosphatase 1 [Source:HGNC Symbol;Acc:30033]	ENSMMUG00000005047	PHPT1	phosphohistidine phosphatase 1 [Source:HGNC Symbol;Acc:HGNC:30033]	Diploid	Diploid
ENSG00000134574	DDB2	damage-specific DNA binding protein 2, 48kDa [Source:HGNC Symbol;Acc:2718]	ENSMMUG00000022964	DDB2	damage specific DNA binding protein 2 [Source:HGNC Symbol;Acc:HGNC:2718]	Diploid	Diploid
ENSG00000177943	MAMDC4	MAM domain containing 4 [Source:HGNC Symbol;Acc:24083]	ENSMMUG00000005048	MAMDC4	MAM domain containing 4 [Source:HGNC Symbol;Acc:HGNC:24083]	Diploid	Diploid
ENSG00000120158	RCL1	RNA terminal phosphate cyclase-like 1 [Source:HGNC Symbol;Acc:17687]	ENSMMUG00000041751			Diploid	Diploid
ENSG00000091622	PITPNM3	PITPNM family member 3 [Source:HGNC Symbol;Acc:21043]	ENSMMUG00000017763	PITPNM3	PITPNM family member 3 [Source:HGNC Symbol;Acc:HGNC:21043]	Diploid	Diploid
ENSG00000204033	LRIT2	leucine-rich repeat, immunoglobulin-like and transmembrane domains 2 [Source:HGNC Symbol;Acc:23443]	ENSMMUG00000000659	LRIT2	leucine rich repeat, Ig-like and transmembrane domains 2 [Source:HGNC Symbol;Acc:HGNC:23443]	Diploid	Diploid
ENSG00000005249	PRKAR2B	protein kinase, cAMP-dependent, regulatory, type II, beta [Source:HGNC Symbol;Acc:9392]	ENSMMUG00000015404	PRKAR2B	protein kinase cAMP-dependent type II regulatory subunit beta [Source:HGNC Symbol;Acc:HGNC:9392]	Diploid	Diploid
ENSG00000148602	LRIT1	leucine-rich repeat, immunoglobulin-like and transmembrane domains 1 [Source:HGNC Symbol;Acc:23404]	ENSMMUG00000000660	LRIT1	leucine rich repeat, Ig-like and transmembrane domains 1 [Source:HGNC Symbol;Acc:HGNC:23404]	Diploid	Diploid
ENSG00000164325	TMEM174	transmembrane protein 174 [Source:HGNC Symbol;Acc:28187]	ENSMMUG00000021099	TMEM174	transmembrane protein 174 [Source:HGNC Symbol;Acc:HGNC:28187]	Diploid	Diploid
ENSG00000005381	MPO	myeloperoxidase [Source:HGNC Symbol;Acc:7218]	ENSMMUG00000002266	MPO	myeloperoxidase [Source:HGNC Symbol;Acc:HGNC:7218]	Diploid	Diploid
ENSG00000179813	FAM216B	family with sequence similarity 216, member B [Source:HGNC Symbol;Acc:26883]	ENSMMUG00000014925	FAM216B	family with sequence similarity 216 member B [Source:HGNC Symbol;Acc:HGNC:26883]	Diploid	Diploid
ENSG00000205795	CYS1	cystin 1 [Source:HGNC Symbol;Acc:18525]	ENSMMUG00000030941	CYS1	cystin 1 [Source:HGNC Symbol;Acc:HGNC:18525]	Diploid	Diploid
ENSG00000075303	SLC25A40	solute carrier family 25, member 40 [Source:HGNC Symbol;Acc:29680]	ENSMMUG00000006767	SLC25A40	solute carrier family 25 member 40 [Source:HGNC Symbol;Acc:HGNC:29680]	Diploid	Diploid
ENSG00000044446	PHKA2	phosphorylase kinase, alpha 2 (liver) [Source:HGNC Symbol;Acc:8926]	ENSMMUG00000020513	PHKA2	phosphorylase kinase regulatory subunit alpha 2 [Source:HGNC Symbol;Acc:HGNC:8926]	Diploid	Diploid
ENSG00000164088	PPM1M	protein phosphatase, Mg2+/Mn2+ dependent, 1M [Source:HGNC Symbol;Acc:26506]	ENSMMUG00000008236	PPM1M	protein phosphatase, Mg2+/Mn2+ dependent 1M [Source:HGNC Symbol;Acc:HGNC:26506]	Diploid	Diploid
ENSG00000046774	MAGEC2	melanoma antigen family C, 2 [Source:HGNC Symbol;Acc:13574]	ENSMMUG00000016642	MAGEC2	MAGE family member C2 [Source:HGNC Symbol;Acc:HGNC:13574]	Diploid	Diploid
ENSG00000064309	CDON	cell adhesion associated, oncogene regulated [Source:HGNC Symbol;Acc:17104]	ENSMMUG00000007628	CDON	cell adhesion associated, oncogene regulated [Source:HGNC Symbol;Acc:HGNC:17104]	Diploid	Diploid
ENSG00000130822	PNCK	pregnancy up-regulated nonubiquitous CaM kinase [Source:HGNC Symbol;Acc:13415]	ENSMMUG00000010585	PNCK	pregnancy up-regulated nonubiquitous CaM kinase [Source:HGNC Symbol;Acc:HGNC:13415]	Diploid	Diploid
ENSG00000148604	RGR	retinal G protein coupled receptor [Source:HGNC Symbol;Acc:9990]	ENSMMUG00000000661	RGR	retinal G protein coupled receptor [Source:HGNC Symbol;Acc:HGNC:9990]	Diploid	Diploid
ENSG00000106992	AK1	adenylate kinase 1 [Source:HGNC Symbol;Acc:361]	ENSMMUG00000047346	AK1	adenylate kinase 1 [Source:HGNC Symbol;Acc:HGNC:361]	Diploid	Diploid
ENSG00000108960	MMD	monocyte to macrophage differentiation-associated [Source:HGNC Symbol;Acc:7153]	ENSMMUG00000022628	MMD	monocyte to macrophage differentiation associated [Source:HGNC Symbol;Acc:HGNC:7153]	Diploid	Diploid
ENSG00000145868	FBXO38	F-box protein 38 [Source:HGNC Symbol;Acc:28844]	ENSMMUG00000016908	FBXO38	F-box protein 38 [Source:HGNC Symbol;Acc:HGNC:28844]	Diploid	Diploid
ENSG00000184564	SLITRK6	SLIT and NTRK-like family, member 6 [Source:HGNC Symbol;Acc:23503]	ENSMMUG00000016317	SLITRK6	SLIT and NTRK like family member 6 [Source:HGNC Symbol;Acc:HGNC:23503]	Diploid	Diploid
ENSG00000196664	TLR7	toll-like receptor 7 [Source:HGNC Symbol;Acc:15631]	ENSMMUG00000014254	TLR7	Macaca mulatta toll-like receptor 7 (TLR7), mRNA. [Source:RefSeq mRNA;Acc:NM_001130426]	Diploid	Diploid
ENSG00000102226	USP11	ubiquitin specific peptidase 11 [Source:HGNC Symbol;Acc:12609]	ENSMMUG00000016608	USP11	ubiquitin specific peptidase 11 [Source:HGNC Symbol;Acc:HGNC:12609]	Diploid	Diploid
ENSG00000101916	TLR8	toll-like receptor 8 [Source:HGNC Symbol;Acc:15632]	ENSMMUG00000014255	TLR8	Macaca mulatta toll-like receptor 8 (TLR8), mRNA. [Source:RefSeq mRNA;Acc:NM_001130427]	Diploid	Diploid
ENSG00000048545	GUCA1A	guanylate cyclase activator 1A (retina) [Source:HGNC Symbol;Acc:4678]	ENSMMUG00000000872	GUCA1A	guanylate cyclase activator 1A [Source:HGNC Symbol;Acc:HGNC:4678]	Diploid	Diploid
ENSG00000186185	KIF18B	kinesin family member 18B [Source:HGNC Symbol;Acc:27102]	ENSMMUG00000013113	KIF18B	kinesin family member 18B [Source:HGNC Symbol;Acc:HGNC:27102]	Diploid	Diploid
ENSG00000221852	KRTAP1-5	keratin associated protein 1-5 [Source:HGNC Symbol;Acc:16777]	ENSMMUG00000020299	KRTAP1-5	keratin associated protein 1-5 [Source:HGNC Symbol;Acc:HGNC:16777]	Diploid	CNV as a whole
ENSG00000018280	SLC11A1	solute carrier family 11 (proton-coupled divalent metal ion transporter), member 1 [Source:HGNC Symbol;Acc:10907]	ENSMMUG00000013359	SLC11A1	solute carrier family 11 member 1 [Source:HGNC Symbol;Acc:HGNC:10907]	Diploid	Diploid
ENSG00000130731	C16orf13	chromosome 16 open reading frame 13 [Source:HGNC Symbol;Acc:14141]	ENSMMUG00000021968	C20H16orf13	UPF0585 protein C16orf13 [Source:RefSeq peptide;Acc:NP_001191092]	Diploid	Diploid
ENSG00000146592	CREB5	cAMP responsive element binding protein 5 [Source:HGNC Symbol;Acc:16844]	ENSMMUG00000039317	CREB5	cAMP responsive element binding protein 5 [Source:HGNC Symbol;Acc:HGNC:16844]	Diploid	Diploid
ENSG00000181104	F2R	coagulation factor II (thrombin) receptor [Source:HGNC Symbol;Acc:3537]	ENSMMUG00000039522	F2R	coagulation factor II thrombin receptor [Source:HGNC Symbol;Acc:HGNC:3537]	Diploid	Diploid
ENSG00000140955	ADAD2	adenosine deaminase domain containing 2 [Source:HGNC Symbol;Acc:30714]	ENSMMUG00000019188	ADAD2	adenosine deaminase domain containing 2 [Source:HGNC Symbol;Acc:HGNC:30714]	Diploid	Diploid
ENSG00000214732	RP1-139D8.6		ENSMMUG00000047592			Diploid	Diploid
ENSG00000164220	F2RL2	coagulation factor II (thrombin) receptor-like 2 [Source:HGNC Symbol;Acc:3539]	ENSMMUG00000022988	F2RL2	coagulation factor II thrombin receptor like 2 [Source:HGNC Symbol;Acc:HGNC:3539]	Diploid	Diploid
ENSG00000188133	TMEM215	transmembrane protein 215 [Source:HGNC Symbol;Acc:33816]	ENSMMUG00000007964	TMEM215	transmembrane protein 215 [Source:HGNC Symbol;Acc:HGNC:33816]	Diploid	Diploid
ENSG00000109016	DHRS7B	dehydrogenase/reductase (SDR family) member 7B [Source:HGNC Symbol;Acc:24547]	ENSMMUG00000013194	DHRS7B	dehydrogenase/reductase 7B [Source:HGNC Symbol;Acc:HGNC:24547]	Diploid	Diploid
ENSG00000119707	RBM25	RNA binding motif protein 25 [Source:HGNC Symbol;Acc:23244]	ENSMMUG00000002332	RBM25	RNA binding motif protein 25 [Source:HGNC Symbol;Acc:HGNC:23244]	Diploid	Diploid
ENSG00000164465	DCBLD1	discoidin, CUB and LCCL domain containing 1 [Source:HGNC Symbol;Acc:21479]	ENSMMUG00000017558	DCBLD1	discoidin, CUB and LCCL domain containing 1 [Source:HGNC Symbol;Acc:HGNC:21479]	Diploid	Diploid
ENSG00000149136	SSRP1	structure specific recognition protein 1 [Source:HGNC Symbol;Acc:11327]	ENSMMUG00000017810	SSRP1	structure specific recognition protein 1 [Source:HGNC Symbol;Acc:HGNC:11327]	Diploid	Diploid
ENSG00000157542	KCNJ6	potassium inwardly-rectifying channel, subfamily J, member 6 [Source:HGNC Symbol;Acc:6267]	ENSMMUG00000018136	KCNJ6	potassium voltage-gated channel subfamily J member 6 [Source:HGNC Symbol;Acc:HGNC:6267]	Diploid	Diploid
ENSG00000103168	TAF1C	TATA box binding protein (TBP)-associated factor, RNA polymerase I, C, 110kDa [Source:HGNC Symbol;Acc:11534]	ENSMMUG00000008569	TAF1C	TATA-box binding protein associated factor, RNA polymerase I subunit C [Source:HGNC Symbol;Acc:HGNC:11534]	Diploid	Diploid
ENSG00000149499	EML3	echinoderm microtubule associated protein like 3 [Source:HGNC Symbol;Acc:26666]	ENSMMUG00000018112	EML3	echinoderm microtubule associated protein like 3 [Source:HGNC Symbol;Acc:HGNC:26666]	Diploid	Diploid
ENSG00000179058	C9orf50	chromosome 9 open reading frame 50 [Source:HGNC Symbol;Acc:23677]	ENSMMUG00000009965	C9orf50	chromosome 9 open reading frame 50 [Source:HGNC Symbol;Acc:HGNC:23677]	Diploid	Diploid
ENSG00000169239	CA5B	carbonic anhydrase VB, mitochondrial [Source:HGNC Symbol;Acc:1378]	ENSMMUG00000014052	CA5B	carbonic anhydrase 5B [Source:HGNC Symbol;Acc:HGNC:1378]	Diploid	Diploid
ENSG00000136279	DBNL	drebrin-like [Source:HGNC Symbol;Acc:2696]	ENSMMUG00000002411	DBNL	drebrin like [Source:HGNC Symbol;Acc:HGNC:2696]	Diploid	Diploid
ENSG00000188581	KRTAP1-1	keratin associated protein 1-1 [Source:HGNC Symbol;Acc:16772]	ENSMMUG00000020301			Diploid	CNV as a whole
ENSG00000167550	RHEBL1	Ras homolog enriched in brain like 1 [Source:HGNC Symbol;Acc:21166]	ENSMMUG00000015721	RHEBL1	RHEB like 1 [Source:HGNC Symbol;Acc:HGNC:21166]	Diploid	Diploid
ENSG00000148331	ASB6	ankyrin repeat and SOCS box containing 6 [Source:HGNC Symbol;Acc:17181]	ENSMMUG00000011816	ASB6	ankyrin repeat and SOCS box containing 6 [Source:HGNC Symbol;Acc:HGNC:17181]	Diploid	Diploid
ENSG00000152127	MGAT5	mannosyl (alpha-1,6-)-glycoprotein beta-1,6-N-acetyl-glucosaminyltransferase [Source:HGNC Symbol;Acc:7049]	ENSMMUG00000010563	MGAT5	mannosyl (alpha-1,6-)-glycoprotein beta-1,6-N-acetyl-glucosaminyltransferase [Source:HGNC Symbol;Acc:HGNC:7049]	Diploid	Diploid
ENSG00000152217	SETBP1	SET binding protein 1 [Source:HGNC Symbol;Acc:15573]	ENSMMUG00000004997	SETBP1	SET binding protein 1 [Source:HGNC Symbol;Acc:HGNC:15573]	Diploid	Diploid
ENSG00000112599	GUCA1B	guanylate cyclase activator 1B (retina) [Source:HGNC Symbol;Acc:4679]	ENSMMUG00000003999	GUCA1B	guanylate cyclase activator 1B [Source:HGNC Symbol;Acc:HGNC:4679]	Diploid	Diploid
ENSG00000154153	FAM134B	family with sequence similarity 134, member B [Source:HGNC Symbol;Acc:25964]	ENSMMUG00000001375	RETREG1	reticulophagy regulator 1 [Source:HGNC Symbol;Acc:HGNC:25964]	Diploid	Diploid
ENSG00000197136	PCNXL3	pecanex-like 3 (Drosophila) [Source:HGNC Symbol;Acc:18760]	ENSMMUG00000007406	PCNXL3	pecanex homolog 3 (Drosophila) [Source:HGNC Symbol;Acc:HGNC:18760]	Diploid	Diploid
ENSG00000139549	DHH	desert hedgehog [Source:HGNC Symbol;Acc:2865]	ENSMMUG00000012776	DHH	desert hedgehog [Source:HGNC Symbol;Acc:HGNC:2865]	Diploid	Diploid
ENSG00000165995	CACNB2	calcium channel, voltage-dependent, beta 2 subunit [Source:HGNC Symbol;Acc:1402]	ENSMMUG00000007445	CACNB2	calcium voltage-gated channel auxiliary subunit beta 2 [Source:HGNC Symbol;Acc:HGNC:1402]	Diploid	Diploid
ENSG00000136824	SMC2	structural maintenance of chromosomes 2 [Source:HGNC Symbol;Acc:14011]	ENSMMUG00000020463	SMC2	structural maintenance of chromosomes 2 [Source:HGNC Symbol;Acc:HGNC:14011]	Diploid	Diploid
ENSG00000183186	C2CD4C	C2 calcium-dependent domain containing 4C [Source:HGNC Symbol;Acc:29417]	ENSMMUG00000000484	C2CD4C	C2 calcium dependent domain containing 4C [Source:HGNC Symbol;Acc:HGNC:29417]	Diploid	Diploid
ENSG00000182264	IZUMO1	izumo sperm-egg fusion 1 [Source:HGNC Symbol;Acc:28539]	ENSMMUG00000004019	IZUMO1	izumo sperm-egg fusion 1 [Source:HGNC Symbol;Acc:HGNC:28539]	Diploid	Diploid
ENSG00000185291	IL3RA	interleukin 3 receptor, alpha (low affinity) [Source:HGNC Symbol;Acc:6012]	ENSMMUG00000046332	IL3RA	interleukin 3 receptor subunit alpha [Source:HGNC Symbol;Acc:HGNC:6012]	Diploid	Diploid
ENSG00000060762	MPC1	mitochondrial pyruvate carrier 1 [Source:HGNC Symbol;Acc:21606]	ENSMMUG00000011739	BRP44L	mitochondrial pyruvate carrier 1 [Source:HGNC Symbol;Acc:HGNC:21606]	Diploid	Diploid
ENSG00000151322	NPAS3	neuronal PAS domain protein 3 [Source:HGNC Symbol;Acc:19311]	ENSMMUG00000014839	NPAS3	neuronal PAS domain protein 3 [Source:HGNC Symbol;Acc:HGNC:19311]	Diploid	Diploid
ENSG00000181552	EDDM3B	epididymal protein 3B [Source:HGNC Symbol;Acc:19223]	ENSMMUG00000001656	EDDM3B	epididymal protein 3B [Source:HGNC Symbol;Acc:HGNC:19223]	Diploid	Diploid
ENSG00000168237	GLYCTK	glycerate kinase [Source:HGNC Symbol;Acc:24247]	ENSMMUG00000016971	GLYCTK	glycerate kinase [Source:HGNC Symbol;Acc:HGNC:24247]	Diploid	Diploid
ENSG00000107175	CREB3	cAMP responsive element binding protein 3 [Source:HGNC Symbol;Acc:2347]	ENSMMUG00000016328	CREB3	cAMP responsive element binding protein 3 [Source:HGNC Symbol;Acc:HGNC:2347]	Diploid	Diploid
ENSG00000161653	NAGS	N-acetylglutamate synthase [Source:HGNC Symbol;Acc:17996]	ENSMMUG00000009713	NAGS	N-acetylglutamate synthase [Source:HGNC Symbol;Acc:HGNC:17996]	Diploid	Diploid
ENSG00000111667	USP5	ubiquitin specific peptidase 5 (isopeptidase T) [Source:HGNC Symbol;Acc:12628]	ENSMMUG00000005192	USP5	ubiquitin carboxyl-terminal hydrolase 5 [Source:RefSeq peptide;Acc:NP_001244771]	Diploid	Diploid
ENSG00000166292	TMEM100	transmembrane protein 100 [Source:HGNC Symbol;Acc:25607]	ENSMMUG00000006068	TMEM100	transmembrane protein 100 [Source:HGNC Symbol;Acc:HGNC:25607]	Diploid	Diploid
ENSG00000023608	SNAPC1	small nuclear RNA activating complex, polypeptide 1, 43kDa [Source:HGNC Symbol;Acc:11134]	ENSMMUG00000017303	SNAPC1	small nuclear RNA activating complex polypeptide 1 [Source:HGNC Symbol;Acc:HGNC:11134]	Diploid	Diploid
ENSG00000128654	MTX2	metaxin 2 [Source:HGNC Symbol;Acc:7506]	ENSMMUG00000010185	MTX2	metaxin 2 [Source:HGNC Symbol;Acc:HGNC:7506]	Diploid	Diploid
ENSG00000113555	PCDH12	protocadherin 12 [Source:HGNC Symbol;Acc:8657]	ENSMMUG00000006291	PCDH12	protocadherin 12 [Source:HGNC Symbol;Acc:HGNC:8657]	Diploid	Diploid
ENSG00000099330	OCEL1	occludin/ELL domain containing 1 [Source:HGNC Symbol;Acc:26221]	ENSMMUG00000011931	OCEL1	occludin/ELL domain containing 1 [Source:HGNC Symbol;Acc:HGNC:26221]	Diploid	Diploid
ENSG00000174453	VWC2L	von Willebrand factor C domain containing protein 2-like [Source:HGNC Symbol;Acc:37203]	ENSMMUG00000000384	VWC2L	von Willebrand factor C domain containing protein 2 like [Source:HGNC Symbol;Acc:HGNC:37203]	Diploid	Diploid
ENSG00000137076	TLN1	talin 1 [Source:HGNC Symbol;Acc:11845]	ENSMMUG00000031856	TLN1	talin 1 [Source:HGNC Symbol;Acc:HGNC:11845]	Diploid	Diploid
ENSG00000136161	RCBTB2	regulator of chromosome condensation (RCC1) and BTB (POZ) domain containing protein 2 [Source:HGNC Symbol;Acc:1914]	ENSMMUG00000017688	RCBTB2	RCC1 and BTB domain containing protein 2 [Source:HGNC Symbol;Acc:HGNC:1914]	Diploid	Diploid
ENSG00000140497	SCAMP2	secretory carrier membrane protein 2 [Source:HGNC Symbol;Acc:10564]	ENSMMUG00000012974	SCAMP2	secretory carrier membrane protein 2 [Source:HGNC Symbol;Acc:HGNC:10564]	Diploid	Diploid
ENSG00000211455	STK38L	serine/threonine kinase 38 like [Source:HGNC Symbol;Acc:17848]	ENSMMUG00000023248	STK38L	serine/threonine kinase 38 like [Source:HGNC Symbol;Acc:HGNC:17848]	Diploid	Diploid
ENSG00000105122	RASAL3	RAS protein activator like 3 [Source:HGNC Symbol;Acc:26129]	ENSMMUG00000003030			Diploid	Diploid
ENSG00000070610	GBA2	glucosidase, beta (bile acid) 2 [Source:HGNC Symbol;Acc:18986]	ENSMMUG00000016331	GBA2	glucosylceramidase beta 2 [Source:HGNC Symbol;Acc:HGNC:18986]	Diploid	Diploid
ENSG00000026559	KCNG1	potassium voltage-gated channel, subfamily G, member 1 [Source:HGNC Symbol;Acc:6248]	ENSMMUG00000000683	KCNG1	potassium voltage-gated channel modifier subfamily G member 1 [Source:HGNC Symbol;Acc:HGNC:6248]	Diploid	Diploid
ENSG00000112280	COL9A1	collagen, type IX, alpha 1 [Source:HGNC Symbol;Acc:2217]	ENSMMUG00000005577	COL9A1	collagen type IX alpha 1 chain [Source:HGNC Symbol;Acc:HGNC:2217]	Diploid	Diploid
ENSG00000172901	AQPEP	Aminopeptidase Q [Source:UniProtKB/Swiss-Prot;Acc:Q6Q4G3]	ENSMMUG00000022191	LVRN	laeverin [Source:HGNC Symbol;Acc:HGNC:26904]	Diploid	Diploid
ENSG00000130368	MAS1	MAS1 oncogene [Source:HGNC Symbol;Acc:6899]	ENSMMUG00000016217	MAS1	MAS1 proto-oncogene, G protein-coupled receptor [Source:HGNC Symbol;Acc:HGNC:6899]	Diploid	Diploid
ENSG00000172366	FAM195A	family with sequence similarity 195, member A [Source:HGNC Symbol;Acc:14142]	ENSMMUG00000041708			Diploid	Diploid
ENSG00000198924	DCLRE1A	DNA cross-link repair 1A [Source:HGNC Symbol;Acc:17660]	ENSMMUG00000016644	DCLRE1A	DNA cross-link repair 1A [Source:HGNC Symbol;Acc:HGNC:17660]	Diploid	Diploid
ENSG00000139679	LPAR6	lysophosphatidic acid receptor 6 [Source:HGNC Symbol;Acc:15520]	ENSMMUG00000007894	LPAR6	lysophosphatidic acid receptor 6 [Source:HGNC Symbol;Acc:HGNC:15520]	Diploid	Diploid
ENSG00000204287	HLA-DRA	major histocompatibility complex, class II, DR alpha [Source:HGNC Symbol;Acc:4947]	ENSMMUG00000039082	DRA	major histocompatibility complex, class II, DR alpha [Source:HGNC Symbol;Acc:HGNC:4947]	Diploid	Diploid
ENSG00000146426	TIAM2	T-cell lymphoma invasion and metastasis 2 [Source:HGNC Symbol;Acc:11806]	ENSMMUG00000011169	TIAM2	T-cell lymphoma invasion and metastasis 2 [Source:HGNC Symbol;Acc:HGNC:11806]	Diploid	Diploid
ENSG00000178307	TMEM11	transmembrane protein 11 [Source:HGNC Symbol;Acc:16823]	ENSMMUG00000020893	TMEM11	transmembrane protein 11 [Source:HGNC Symbol;Acc:HGNC:16823]	Diploid	Diploid
ENSG00000196812	ZSCAN16	zinc finger and SCAN domain containing 16 [Source:HGNC Symbol;Acc:20813]	ENSMMUG00000003331	ZSCAN16	zinc finger and SCAN domain containing 16 [Source:HGNC Symbol;Acc:HGNC:20813]	Diploid	Diploid
ENSG00000185615	PDIA2	protein disulfide isomerase family A, member 2 [Source:HGNC Symbol;Acc:14180]	ENSMMUG00000000604	PDIA2	protein disulfide-isomerase A2 precursor [Source:RefSeq peptide;Acc:NP_001252974]	Diploid	Diploid
ENSG00000131080	EDA2R	ectodysplasin A2 receptor [Source:HGNC Symbol;Acc:17756]	ENSMMUG00000015031	EDA2R	ectodysplasin A2 receptor [Source:HGNC Symbol;Acc:HGNC:17756]	Diploid	Diploid
ENSG00000124496	TRERF1	transcriptional regulating factor 1 [Source:HGNC Symbol;Acc:18273]	ENSMMUG00000005575	TRERF1	transcriptional regulating factor 1 [Source:HGNC Symbol;Acc:HGNC:18273]	Diploid	Diploid
ENSG00000135355	GJA10	gap junction protein, alpha 10, 62kDa [Source:HGNC Symbol;Acc:16995]	ENSMMUG00000005800	GJA10	gap junction protein alpha 10 [Source:HGNC Symbol;Acc:HGNC:16995]	Diploid	Diploid
ENSG00000015520	NPC1L1	NPC1-like 1 [Source:HGNC Symbol;Acc:7898]	ENSMMUG00000000782	NPC1L1	NPC1 like intracellular cholesterol transporter 1 [Source:HGNC Symbol;Acc:HGNC:7898]	Diploid	Diploid
ENSG00000148942	SLC5A12	solute carrier family 5 (sodium/monocarboxylate cotransporter), member 12 [Source:HGNC Symbol;Acc:28750]	ENSMMUG00000003021	SLC5A12	solute carrier family 5 member 12 [Source:HGNC Symbol;Acc:HGNC:28750]	Diploid	Diploid
ENSG00000159387	IRX6	iroquois homeobox 6 [Source:HGNC Symbol;Acc:14675]	ENSMMUG00000011658	IRX6	iroquois homeobox 6 [Source:HGNC Symbol;Acc:HGNC:14675]	Diploid	Diploid
ENSG00000105186	ANKRD27	ankyrin repeat domain 27 (VPS9 domain) [Source:HGNC Symbol;Acc:25310]	ENSMMUG00000008041	ANKRD27	ankyrin repeat domain 27 [Source:HGNC Symbol;Acc:HGNC:25310]	Diploid	Diploid
ENSG00000105856	HBP1	HMG-box transcription factor 1 [Source:HGNC Symbol;Acc:23200]	ENSMMUG00000015409	HBP1	HMG box-containing protein 1 [Source:RefSeq peptide;Acc:NP_001247949]	Diploid	Diploid
ENSG00000162572	SCNN1D	sodium channel, non-voltage-gated 1, delta subunit [Source:HGNC Symbol;Acc:10601]	ENSMMUG00000032292	SCNN1D	sodium channel epithelial 1 delta subunit [Source:HGNC Symbol;Acc:HGNC:10601]	Diploid	Diploid
ENSG00000124279	FASTKD3	FAST kinase domains 3 [Source:HGNC Symbol;Acc:28758]	ENSMMUG00000018746	FASTKD3	FAST kinase domains 3 [Source:HGNC Symbol;Acc:HGNC:28758]	Diploid	Diploid
ENSG00000204248	COL11A2	collagen, type XI, alpha 2 [Source:HGNC Symbol;Acc:2187]	ENSMMUG00000003850	COL11A2	collagen type XI alpha 2 chain [Source:HGNC Symbol;Acc:HGNC:2187]	Diploid	Diploid
ENSG00000099622	CIRBP	cold inducible RNA binding protein [Source:HGNC Symbol;Acc:1982]	ENSMMUG00000022101	CIRBP	cold-inducible RNA-binding protein [Source:RefSeq peptide;Acc:NP_001248245]	Diploid	Diploid
ENSG00000242550	SERPINB10	serpin peptidase inhibitor, clade B (ovalbumin), member 10 [Source:HGNC Symbol;Acc:8942]	ENSMMUG00000016618	SERPINB10	serpin family B member 10 [Source:HGNC Symbol;Acc:HGNC:8942]	Diploid	Diploid
ENSG00000107099	DOCK8	dedicator of cytokinesis 8 [Source:HGNC Symbol;Acc:19191]	ENSMMUG00000016976	DOCK8	dedicator of cytokinesis 8 [Source:HGNC Symbol;Acc:HGNC:19191]	Diploid	Diploid
ENSG00000172361	CCDC11	coiled-coil domain containing 11 [Source:HGNC Symbol;Acc:26530]	ENSMMUG00000009049	CFAP53	cilia and flagella associated protein 53 [Source:HGNC Symbol;Acc:HGNC:26530]	Diploid	Diploid
ENSG00000124275	MTRR	5-methyltetrahydrofolate-homocysteine methyltransferase reductase [Source:HGNC Symbol;Acc:7473]	ENSMMUG00000018747	MTRR	5-methyltetrahydrofolate-homocysteine methyltransferase reductase [Source:HGNC Symbol;Acc:HGNC:7473]	Diploid	Diploid
ENSG00000197632	SERPINB2	serpin peptidase inhibitor, clade B (ovalbumin), member 2 [Source:HGNC Symbol;Acc:8584]	ENSMMUG00000016617	SERPINB2	serpin family B member 2 [Source:HGNC Symbol;Acc:HGNC:8584]	Diploid	Diploid
ENSG00000104368	PLAT	plasminogen activator, tissue [Source:HGNC Symbol;Acc:9051]	ENSMMUG00000014432	PLAT	plasminogen activator, tissue type [Source:HGNC Symbol;Acc:HGNC:9051]	Diploid	Diploid
ENSG00000198315	ZKSCAN8	zinc finger with KRAB and SCAN domains 8 [Source:HGNC Symbol;Acc:12983]	ENSMMUG00000003332	ZKSCAN8	zinc finger with KRAB and SCAN domains 8 [Source:HGNC Symbol;Acc:HGNC:12983]	Diploid	Diploid
ENSG00000164181	ELOVL7	ELOVL fatty acid elongase 7 [Source:HGNC Symbol;Acc:26292]	ENSMMUG00000014211	ELOVL7	ELOVL fatty acid elongase 7 [Source:HGNC Symbol;Acc:HGNC:26292]	Diploid	Diploid
ENSG00000091947	TMEM101	transmembrane protein 101 [Source:HGNC Symbol;Acc:28653]	ENSMMUG00000040053	TMEM101	transmembrane protein 101 [Source:HGNC Symbol;Acc:HGNC:28653]	Diploid	Diploid
ENSG00000129538	RNASE1	ribonuclease, RNase A family, 1 (pancreatic) [Source:HGNC Symbol;Acc:10044]	ENSMMUG00000017666	RNASE1	ribonuclease A family member 1, pancreatic [Source:HGNC Symbol;Acc:HGNC:10044]	Diploid	Diploid
ENSG00000112182	BACH2	BTB and CNC homology 1, basic leucine zipper transcription factor 2 [Source:HGNC Symbol;Acc:14078]	ENSMMUG00000009736	BACH2	BTB domain and CNC homolog 2 [Source:HGNC Symbol;Acc:HGNC:14078]	Diploid	Diploid
ENSG00000186326	RGS9BP	regulator of G protein signaling 9 binding protein [Source:HGNC Symbol;Acc:30304]	ENSMMUG00000046695	RGS9BP	regulator of G-protein signaling 9 binding protein [Source:HGNC Symbol;Acc:HGNC:30304]	Diploid	Diploid
ENSG00000125378	BMP4	bone morphogenetic protein 4 [Source:HGNC Symbol;Acc:1071]	ENSMMUG00000000429	BMP4	bone morphogenetic protein 4 [Source:HGNC Symbol;Acc:HGNC:1071]	Diploid	Diploid
ENSG00000164708	PGAM2	phosphoglycerate mutase 2 (muscle) [Source:HGNC Symbol;Acc:8889]	ENSMMUG00000038027	PGAM2	phosphoglycerate mutase 2 [Source:HGNC Symbol;Acc:HGNC:8889]	Diploid	Diploid
ENSG00000174951	FUT1	fucosyltransferase 1 (galactoside 2-alpha-L-fucosyltransferase, H blood group) [Source:HGNC Symbol;Acc:4012]	ENSMMUG00000004020	FUT1	fucosyltransferase 1 (H blood group) [Source:HGNC Symbol;Acc:HGNC:4012]	Diploid	Diploid
ENSG00000119919	NKX2-3	NK2 homeobox 3 [Source:HGNC Symbol;Acc:7836]	ENSMMUG00000018270	NKX2-3	NK2 homeobox 3 [Source:HGNC Symbol;Acc:HGNC:7836]	Diploid	Diploid
ENSG00000090932	DLL3	delta-like 3 (Drosophila) [Source:HGNC Symbol;Acc:2909]	ENSMMUG00000019093	DLL3	delta like canonical Notch ligand 3 [Source:HGNC Symbol;Acc:HGNC:2909]	Diploid	Diploid
ENSG00000189252	SPANXN3	SPANX family, member N3 [Source:HGNC Symbol;Acc:33176]	ENSMMUG00000001114	SPANXN3	SPANX family member N3 [Source:HGNC Symbol;Acc:HGNC:33176]	Diploid	Diploid
ENSG00000064547	LPAR2	lysophosphatidic acid receptor 2 [Source:HGNC Symbol;Acc:3168]	ENSMMUG00000000654	LPAR2	lysophosphatidic acid receptor 2 [Source:HGNC Symbol;Acc:HGNC:3168]	Diploid	Diploid
ENSG00000111726	CMAS	cytidine monophosphate N-acetylneuraminic acid synthetase [Source:HGNC Symbol;Acc:18290]	ENSMMUG00000020808	CMAS	cytidine monophosphate N-acetylneuraminic acid synthetase [Source:HGNC Symbol;Acc:HGNC:18290]	Diploid	Diploid
ENSG00000112984	KIF20A	kinesin family member 20A [Source:HGNC Symbol;Acc:9787]	ENSMMUG00000001511	KIF20A	kinesin family member 20A [Source:HGNC Symbol;Acc:HGNC:9787]	Diploid	Diploid
ENSG00000155287	SLC25A28	solute carrier family 25 (mitochondrial iron transporter), member 28 [Source:HGNC Symbol;Acc:23472]	ENSMMUG00000023760	SLC25A28	solute carrier family 25 member 28 [Source:HGNC Symbol;Acc:HGNC:23472]	Diploid	Diploid
ENSG00000109991	P2RX3	purinergic receptor P2X, ligand-gated ion channel, 3 [Source:HGNC Symbol;Acc:8534]	ENSMMUG00000017813	P2RX3	purinergic receptor P2X 3 [Source:HGNC Symbol;Acc:HGNC:8534]	Diploid	Diploid
ENSG00000111728	ST8SIA1	ST8 alpha-N-acetyl-neuraminide alpha-2,8-sialyltransferase 1 [Source:HGNC Symbol;Acc:10869]	ENSMMUG00000003685	ST8SIA1	ST8 alpha-N-acetyl-neuraminide alpha-2,8-sialyltransferase 1 [Source:HGNC Symbol;Acc:HGNC:10869]	Diploid	Diploid
ENSG00000068383	INPP5A	inositol polyphosphate-5-phosphatase, 40kDa [Source:HGNC Symbol;Acc:6076]	ENSMMUG00000003802	INPP5A	inositol polyphosphate-5-phosphatase A [Source:HGNC Symbol;Acc:HGNC:6076]	Diploid	Diploid
ENSG00000118271	TTR	transthyretin [Source:HGNC Symbol;Acc:12405]	ENSMMUG00000016673	TTR	transthyretin [Source:HGNC Symbol;Acc:HGNC:12405]	Diploid	Diploid
ENSG00000215217	C5orf49	chromosome 5 open reading frame 49 [Source:HGNC Symbol;Acc:27028]	ENSMMUG00000018745	C5orf49	chromosome 5 open reading frame 49 [Source:HGNC Symbol;Acc:HGNC:27028]	Diploid	Diploid
ENSG00000096717	SIRT1	sirtuin 1 [Source:HGNC Symbol;Acc:14929]	ENSMMUG00000030531	SIRT1	sirtuin 1 [Source:HGNC Symbol;Acc:HGNC:14929]	Diploid	Diploid
ENSG00000181577	C6orf223	chromosome 6 open reading frame 223 [Source:HGNC Symbol;Acc:28692]	ENSMMUG00000011364	C6orf223	chromosome 6 open reading frame 223 [Source:HGNC Symbol;Acc:HGNC:28692]	Diploid	Diploid
ENSG00000149054	ZNF215	zinc finger protein 215 [Source:HGNC Symbol;Acc:13007]	ENSMMUG00000009264			Diploid	Diploid
ENSG00000156575	PRG3	proteoglycan 3 [Source:HGNC Symbol;Acc:9363]	ENSMMUG00000017814	PRG3	proteoglycan 3, pro eosinophil major basic protein 2 [Source:HGNC Symbol;Acc:HGNC:9363]	Diploid	Diploid
ENSG00000112983	BRD8	bromodomain containing 8 [Source:HGNC Symbol;Acc:19874]	ENSMMUG00000001507	BRD8	bromodomain containing 8 [Source:HGNC Symbol;Acc:HGNC:19874]	Diploid	Diploid
ENSG00000122304	PRM2	protamine 2 [Source:HGNC Symbol;Acc:9448]	ENSMMUG00000010953	PRM2	protamine 2 [Source:HGNC Symbol;Acc:HGNC:9448]	Diploid	Diploid
ENSG00000124491	F13A1	coagulation factor XIII, A1 polypeptide [Source:HGNC Symbol;Acc:3531]	ENSMMUG00000001248	F13A1	coagulation factor XIII A chain [Source:HGNC Symbol;Acc:HGNC:3531]	Diploid	Diploid
ENSG00000119411	BSPRY	B-box and SPRY domain containing [Source:HGNC Symbol;Acc:18232]	ENSMMUG00000005851	BSPRY	B-box and SPRY domain containing [Source:HGNC Symbol;Acc:HGNC:18232]	Diploid	Diploid
ENSG00000160469	BRSK1	BR serine/threonine kinase 1 [Source:HGNC Symbol;Acc:18994]	ENSMMUG00000002965	BRSK1	BR serine/threonine kinase 1 [Source:HGNC Symbol;Acc:HGNC:18994]	Diploid	Diploid
ENSG00000189180	ZNF33A	zinc finger protein 33A [Source:HGNC Symbol;Acc:13096]	ENSMMUG00000015471	ZNF33A	zinc finger protein 33A [Source:HGNC Symbol;Acc:HGNC:13096]	Duplicated and fixed as a whole	Duplicated and fixed as a whole
ENSG00000172209	GPR22	G protein-coupled receptor 22 [Source:HGNC Symbol;Acc:4477]	ENSMMUG00000015412	GPR22	G protein-coupled receptor 22 [Source:HGNC Symbol;Acc:HGNC:4477]	Diploid	Diploid
ENSG00000163013	FBXO41	F-box protein 41 [Source:HGNC Symbol;Acc:29409]	ENSMMUG00000047722	FBXO41	F-box protein 41 [Source:HGNC Symbol;Acc:HGNC:29409]	Diploid	Diploid
ENSG00000213445	SIPA1	signal-induced proliferation-associated 1 [Source:HGNC Symbol;Acc:10885]	ENSMMUG00000007416	SIPA1	signal-induced proliferation-associated 1 [Source:HGNC Symbol;Acc:HGNC:10885]	Diploid	Diploid
ENSG00000175643	RMI2	RecQ mediated genome instability 2 [Source:HGNC Symbol;Acc:28349]	ENSMMUG00000039308			Diploid	Diploid
ENSG00000104886	PLEKHJ1	pleckstrin homology domain containing, family J member 1 [Source:HGNC Symbol;Acc:18211]	ENSMMUG00000010109	PLEKHJ1	pleckstrin homology domain containing J1 [Source:HGNC Symbol;Acc:HGNC:18211]	Diploid	Diploid
ENSG00000215788	TNFRSF25	tumor necrosis factor receptor superfamily, member 25 [Source:HGNC Symbol;Acc:11910]	ENSMMUG00000023677	TNFRSF25	TNF receptor superfamily member 25 [Source:HGNC Symbol;Acc:HGNC:11910]	Diploid	Diploid
ENSG00000178279	TNP2	transition protein 2 (during histone to protamine replacement) [Source:HGNC Symbol;Acc:11952]	ENSMMUG00000010955	TNP2	transition protein 2 [Source:HGNC Symbol;Acc:HGNC:11952]	Diploid	Diploid
ENSG00000173250	GPR151	G protein-coupled receptor 151 [Source:HGNC Symbol;Acc:23624]	ENSMMUG00000023287	GPR151	G protein-coupled receptor 151 [Source:HGNC Symbol;Acc:HGNC:23624]	Diploid	Diploid
ENSG00000093009	CDC45	cell division cycle 45 [Source:HGNC Symbol;Acc:1739]	ENSMMUG00000021904	CDC45	cell division cycle 45 [Source:HGNC Symbol;Acc:HGNC:1739]	Diploid	Diploid
ENSG00000007384	RHBDF1	rhomboid 5 homolog 1 (Drosophila) [Source:HGNC Symbol;Acc:20561]	ENSMMUG00000000588	RHBDF1	rhomboid 5 homolog 1 [Source:HGNC Symbol;Acc:HGNC:20561]	Diploid	Diploid
ENSG00000171217	CLDN20	claudin 20 [Source:HGNC Symbol;Acc:2042]	ENSMMUG00000011172	CLDN20	claudin 20 [Source:HGNC Symbol;Acc:HGNC:2042]	Diploid	Diploid
ENSG00000104897	SF3A2	splicing factor 3a, subunit 2, 66kDa [Source:HGNC Symbol;Acc:10766]	ENSMMUG00000010111	SF3A2	splicing factor 3a subunit 2 [Source:HGNC Symbol;Acc:HGNC:10766]	Diploid	Diploid
ENSG00000213079	SCAF8	SR-related CTD-associated factor 8 [Source:HGNC Symbol;Acc:20959]	ENSMMUG00000015163	SCAF8	SR-related CTD associated factor 8 [Source:HGNC Symbol;Acc:HGNC:20959]	Diploid	Diploid
ENSG00000115008	IL1A	interleukin 1, alpha [Source:HGNC Symbol;Acc:5991]	ENSMMUG00000019777	IL1A	interleukin 1 alpha [Source:HGNC Symbol;Acc:HGNC:5991]	Diploid	Diploid
ENSG00000147117	ZNF157	zinc finger protein 157 [Source:HGNC Symbol;Acc:12942]	ENSMMUG00000008566	ZNF157	zinc finger protein 157 [Source:HGNC Symbol;Acc:HGNC:12942]	Diploid	Diploid
ENSG00000101096	NFATC2	nuclear factor of activated T-cells, cytoplasmic, calcineurin-dependent 2 [Source:HGNC Symbol;Acc:7776]	ENSMMUG00000012657	NFATC2	nuclear factor of activated T-cells 2 [Source:HGNC Symbol;Acc:HGNC:7776]	Diploid	Diploid
ENSG00000010244	ZNF207	zinc finger protein 207 [Source:HGNC Symbol;Acc:12998]	ENSMMUG00000047479			Diploid	Diploid
ENSG00000113282	CLINT1	clathrin interactor 1 [Source:HGNC Symbol;Acc:23186]	ENSMMUG00000002272	CLINT1	clathrin interactor 1 [Source:HGNC Symbol;Acc:HGNC:23186]	Diploid	Diploid
ENSG00000048140	TSPAN17	tetraspanin 17 [Source:HGNC Symbol;Acc:13594]	ENSMMUG00000000144	TSPAN17	tetraspanin 17 [Source:HGNC Symbol;Acc:HGNC:13594]	Diploid	Diploid
ENSG00000185324	CDK10	cyclin-dependent kinase 10 [Source:HGNC Symbol;Acc:1770]	ENSMMUG00000002503	CDK10	cyclin dependent kinase 10 [Source:HGNC Symbol;Acc:HGNC:1770]	Diploid	Diploid
ENSG00000268988	SPANXN2		ENSMMUG00000040936	SPANXN2	SPANX family member N2 [Source:HGNC Symbol;Acc:HGNC:33175]	Diploid	Diploid
ENSG00000104885	DOT1L	DOT1-like histone H3K79 methyltransferase [Source:HGNC Symbol;Acc:24948]	ENSMMUG00000010107	DOT1L	DOT1 like histone lysine methyltransferase [Source:HGNC Symbol;Acc:HGNC:24948]	Diploid	Diploid
ENSG00000090674	MCOLN1	mucolipin 1 [Source:HGNC Symbol;Acc:13356]	ENSMMUG00000011389	MCOLN1	mucolipin 1 [Source:HGNC Symbol;Acc:HGNC:13356]	Diploid	Diploid
ENSG00000141469	SLC14A1	solute carrier family 14 (urea transporter), member 1 (Kidd blood group) [Source:HGNC Symbol;Acc:10918]	ENSMMUG00000011037	SLC14A1	solute carrier family 14 member 1 (Kidd blood group) [Source:HGNC Symbol;Acc:HGNC:10918]	Diploid	Diploid
ENSG00000166035	LIPC	lipase, hepatic [Source:HGNC Symbol;Acc:6619]	ENSMMUG00000009566	LIPC	lipase C, hepatic type [Source:HGNC Symbol;Acc:HGNC:6619]	Diploid	Diploid
ENSG00000171159	C9orf16	chromosome 9 open reading frame 16 [Source:HGNC Symbol;Acc:17823]	ENSMMUG00000032017	C9orf16	chromosome 9 open reading frame 16 [Source:HGNC Symbol;Acc:HGNC:17823]	Diploid	Diploid
ENSG00000169083	AR	androgen receptor [Source:HGNC Symbol;Acc:644]	ENSMMUG00000011437	AR	androgen receptor [Source:HGNC Symbol;Acc:HGNC:644]	Diploid	Diploid
ENSG00000132429	POPDC3	popeye domain containing 3 [Source:HGNC Symbol;Acc:17649]	ENSMMUG00000014473	POPDC3	popeye domain containing 3 [Source:HGNC Symbol;Acc:HGNC:17649]	Diploid	Diploid
ENSG00000012174	MBTPS2	membrane-bound transcription factor peptidase, site 2 [Source:HGNC Symbol;Acc:15455]	ENSMMUG00000022467	MBTPS2	membrane bound transcription factor peptidase, site 2 [Source:HGNC Symbol;Acc:HGNC:15455]	Diploid	Diploid
ENSG00000029639	TFB1M	transcription factor B1, mitochondrial [Source:HGNC Symbol;Acc:17037]	ENSMMUG00000011171	TFB1M	transcription factor B1, mitochondrial [Source:HGNC Symbol;Acc:HGNC:17037]	Diploid	Diploid
ENSG00000174996	KLC2	kinesin light chain 2 [Source:HGNC Symbol;Acc:20716]	ENSMMUG00000022520	KLC2	kinesin light chain 2 [Source:HGNC Symbol;Acc:HGNC:20716]	Diploid	Diploid
ENSG00000206013	IFITM5	interferon induced transmembrane protein 5 [Source:HGNC Symbol;Acc:16644]	ENSMMUG00000004626	IFITM5	interferon induced transmembrane protein 5 [Source:HGNC Symbol;Acc:HGNC:16644]	Diploid	Diploid
ENSG00000186838	SELV	Selenoprotein V [Source:UniProtKB/Swiss-Prot;Acc:P59797]	ENSMMUG00000046473	SELENOV	selenoprotein V [Source:HGNC Symbol;Acc:HGNC:30399]	Diploid	Diploid
ENSG00000176401	EID2B	EP300 interacting inhibitor of differentiation 2B [Source:HGNC Symbol;Acc:26796]	ENSMMUG00000004549	EID2B	EP300 interacting inhibitor of differentiation 2B [Source:HGNC Symbol;Acc:HGNC:26796]	Diploid	Diploid
ENSG00000123178	SPRYD7	SPRY domain containing 7 [Source:HGNC Symbol;Acc:14297]	ENSMMUG00000009579	C13orf1	SPRY domain containing 7 [Source:HGNC Symbol;Acc:HGNC:14297]	Diploid	Diploid
ENSG00000110092	CCND1	cyclin D1 [Source:HGNC Symbol;Acc:1582]	ENSMMUG00000002368	CCND1	cyclin D1 [Source:HGNC Symbol;Acc:HGNC:1582]	Diploid	Diploid
ENSG00000107771	CCSER2	coiled-coil serine-rich protein 2 [Source:HGNC Symbol;Acc:29197]	ENSMMUG00000019720	CCSER2	protein FAM190B [Source:RefSeq peptide;Acc:NP_001180691]	Diploid	Diploid
ENSG00000011295	TTC19	tetratricopeptide repeat domain 19 [Source:HGNC Symbol;Acc:26006]	ENSMMUG00000008949	TTC19	tetratricopeptide repeat domain 19 [Source:HGNC Symbol;Acc:HGNC:26006]	Diploid	Diploid
ENSG00000119915	ELOVL3	ELOVL fatty acid elongase 3 [Source:HGNC Symbol;Acc:18047]	ENSMMUG00000022752	ELOVL3	ELOVL fatty acid elongase 3 [Source:HGNC Symbol;Acc:HGNC:18047]	Diploid	Diploid
ENSG00000139636	LMBR1L	limb development membrane protein 1-like [Source:HGNC Symbol;Acc:18268]	ENSMMUG00000012769	LMBR1L	protein LMBR1L [Source:RefSeq peptide;Acc:NP_001181683]	Diploid	Diploid
ENSG00000261609	GAN	gigaxonin [Source:HGNC Symbol;Acc:4137]	ENSMMUG00000015029	GAN	gigaxonin [Source:HGNC Symbol;Acc:HGNC:4137]	Diploid	Diploid
ENSG00000149716	ORAOV1	oral cancer overexpressed 1 [Source:HGNC Symbol;Acc:17589]	ENSMMUG00000002369	ORAOV1	oral cancer overexpressed 1 [Source:HGNC Symbol;Acc:HGNC:17589]	Diploid	Diploid
ENSG00000100526	CDKN3	cyclin-dependent kinase inhibitor 3 [Source:HGNC Symbol;Acc:1791]	ENSMMUG00000012323	CDKN3	cyclin dependent kinase inhibitor 3 [Source:HGNC Symbol;Acc:HGNC:1791]	Diploid	Diploid
ENSG00000148344	PTGES	prostaglandin E synthase [Source:HGNC Symbol;Acc:9599]	ENSMMUG00000011822	PTGES	prostaglandin E synthase [Source:HGNC Symbol;Acc:HGNC:9599]	Diploid	Diploid
ENSG00000171858	RPS21	ribosomal protein S21 [Source:HGNC Symbol;Acc:10409]	ENSMMUG00000005006	RPS21	ribosomal protein S21 [Source:HGNC Symbol;Acc:HGNC:10409]	Diploid	Diploid
ENSG00000082805	ERC1	ELKS/RAB6-interacting/CAST family member 1 [Source:HGNC Symbol;Acc:17072]	ENSMMUG00000010933	ERC1	ELKS/RAB6-interacting/CAST family member 1 [Source:HGNC Symbol;Acc:HGNC:17072]	Diploid	Diploid
ENSG00000005448	WDR54	WD repeat domain 54 [Source:HGNC Symbol;Acc:25770]	ENSMMUG00000002719	WDR54	WD repeat domain 54 [Source:HGNC Symbol;Acc:HGNC:25770]	Diploid	Diploid
ENSG00000148377	IDI2	isopentenyl-diphosphate delta isomerase 2 [Source:HGNC Symbol;Acc:23487]	ENSMMUG00000039647	IDI2	isopentenyl-diphosphate delta isomerase 2 [Source:HGNC Symbol;Acc:HGNC:23487]	Diploid	Diploid
ENSG00000158792	SPATA2L	spermatogenesis associated 2-like [Source:HGNC Symbol;Acc:28393]	ENSMMUG00000002504	SPATA2L	spermatogenesis associated 2 like [Source:HGNC Symbol;Acc:HGNC:28393]	Diploid	Diploid
ENSG00000099797	TECR	trans-2,3-enoyl-CoA reductase [Source:HGNC Symbol;Acc:4551]	ENSMMUG00000021611	TECR	trans-2,3-enoyl-CoA reductase [Source:HGNC Symbol;Acc:HGNC:4551]	Diploid	Diploid
ENSG00000164619	BMPER	BMP binding endothelial regulator [Source:HGNC Symbol;Acc:24154]	ENSMMUG00000017232	BMPER	BMP binding endothelial regulator [Source:HGNC Symbol;Acc:HGNC:24154]	Diploid	Diploid
ENSG00000127191	TRAF2	TNF receptor-associated factor 2 [Source:HGNC Symbol;Acc:12032]	ENSMMUG00000011527	TRAF2	TRAF family member-associated NF-kappa-B activator [Source:RefSeq peptide;Acc:NP_001181721]	Diploid	Diploid
ENSG00000198553	KCNRG	potassium channel regulator [Source:HGNC Symbol;Acc:18893]	ENSMMUG00000010899	KCNRG	potassium channel regulator [Source:HGNC Symbol;Acc:HGNC:18893]	Diploid	Diploid
ENSG00000182208	MOB2	MOB kinase activator 2 [Source:HGNC Symbol;Acc:24904]	ENSMMUG00000017450	MOB2	MOB kinase activator 2 [Source:HGNC Symbol;Acc:HGNC:24904]	Diploid	Diploid
ENSG00000164051	CCDC51	coiled-coil domain containing 51 [Source:HGNC Symbol;Acc:25714]	ENSMMUG00000041032	CCDC51	coiled-coil domain containing 51 [Source:HGNC Symbol;Acc:HGNC:25714]	Diploid	Diploid
ENSG00000149679	CABLES2	Cdk5 and Abl enzyme substrate 2 [Source:HGNC Symbol;Acc:16143]	ENSMMUG00000005011	CABLES2	Cdk5 and Abl enzyme substrate 2 [Source:HGNC Symbol;Acc:HGNC:16143]	Diploid	Diploid
ENSG00000180448	HMHA1	histocompatibility (minor) HA-1 [Source:HGNC Symbol;Acc:17102]	ENSMMUG00000015301	ARHGAP45	Rho GTPase activating protein 45 [Source:HGNC Symbol;Acc:HGNC:17102]	Diploid	Diploid
ENSG00000181781	ODF3L2	outer dense fiber of sperm tails 3-like 2 [Source:HGNC Symbol;Acc:26841]	ENSMMUG00000032205	ODF3L2	outer dense fiber of sperm tails 3 like 2 [Source:HGNC Symbol;Acc:HGNC:26841]	Diploid	Diploid
ENSG00000119431	HDHD3	haloacid dehalogenase-like hydrolase domain containing 3 [Source:HGNC Symbol;Acc:28171]	ENSMMUG00000007187	HDHD3	haloacid dehalogenase like hydrolase domain containing 3 [Source:HGNC Symbol;Acc:HGNC:28171]	Diploid	Diploid
ENSG00000068878	PSME4	proteasome (prosome, macropain) activator subunit 4 [Source:HGNC Symbol;Acc:20635]	ENSMMUG00000008104	PSME4	proteasome activator subunit 4 [Source:HGNC Symbol;Acc:HGNC:20635]	Diploid	Diploid
ENSG00000158109	TPRG1L	tumor protein p63 regulated 1-like [Source:HGNC Symbol;Acc:27007]	ENSMMUG00000003785	TPRG1L	tumor protein p63 regulated 1 like [Source:HGNC Symbol;Acc:HGNC:27007]	Diploid	Diploid
ENSG00000169100	SLC25A6	solute carrier family 25 (mitochondrial carrier; adenine nucleotide translocator), member 6 [Source:HGNC Symbol;Acc:10992]	ENSMMUG00000022663	SLC25A6	solute carrier family 25 member 6 [Source:HGNC Symbol;Acc:HGNC:10992]	Diploid	Diploid
ENSG00000171680	PLEKHG5	pleckstrin homology domain containing, family G (with RhoGef domain) member 5 [Source:HGNC Symbol;Acc:29105]	ENSMMUG00000023678	PLEKHG5	pleckstrin homology and RhoGEF domain containing G5 [Source:HGNC Symbol;Acc:HGNC:29105]	Diploid	Diploid
ENSG00000077327	SPAG6	sperm associated antigen 6 [Source:HGNC Symbol;Acc:11215]	ENSMMUG00000000882	SPAG6	sperm associated antigen 6 [Source:HGNC Symbol;Acc:HGNC:11215]	Diploid	Diploid
ENSG00000108479	GALK1	galactokinase 1 [Source:HGNC Symbol;Acc:4118]	ENSMMUG00000021765	GALK1	galactokinase 1 [Source:HGNC Symbol;Acc:HGNC:4118]	Diploid	Diploid
ENSG00000132874	SLC14A2	solute carrier family 14 (urea transporter), member 2 [Source:HGNC Symbol;Acc:10919]	ENSMMUG00000004010	SLC14A2	solute carrier family 14 member 2 [Source:HGNC Symbol;Acc:HGNC:10919]	Diploid	Diploid
ENSG00000005379	BZRAP1	benzodiazepine receptor (peripheral) associated protein 1 [Source:HGNC Symbol;Acc:16831]	ENSMMUG00000018087	TSPOAP1	TSPO associated protein 1 [Source:HGNC Symbol;Acc:HGNC:16831]	Diploid	Diploid
ENSG00000124575	HIST1H1D	histone cluster 1, H1d [Source:HGNC Symbol;Acc:4717]	ENSMMUG00000022050	HIST1H1D	histone cluster 1 H1 family member d [Source:HGNC Symbol;Acc:HGNC:4717]	Diploid	Diploid
ENSG00000170903	MSANTD4	Myb/SANT-like DNA-binding domain containing 4 with coiled-coils [Source:HGNC Symbol;Acc:29383]	ENSMMUG00000010988	MSANTD4	Myb/SANT DNA binding domain containing 4 with coiled-coils [Source:HGNC Symbol;Acc:HGNC:29383]	Diploid	Diploid
ENSG00000142330	CAPN10	calpain 10 [Source:HGNC Symbol;Acc:1477]	ENSMMUG00000015628	CAPN10	calpain 10 [Source:HGNC Symbol;Acc:HGNC:1477]	Diploid	Diploid
ENSG00000141933	TPGS1	tubulin polyglutamylase complex subunit 1 [Source:HGNC Symbol;Acc:25058]	ENSMMUG00000008590	TPGS1	tubulin polyglutamylase complex subunit 1 [Source:HGNC Symbol;Acc:HGNC:25058]	Diploid	Diploid
ENSG00000102172	SMS	spermine synthase [Source:HGNC Symbol;Acc:11123]	ENSMMUG00000020392	SMS	spermine synthase [Source:HGNC Symbol;Acc:HGNC:11123]	Diploid	Diploid
ENSG00000137074	APTX	aprataxin [Source:HGNC Symbol;Acc:15984]	ENSMMUG00000007724	APTX	aprataxin [Source:RefSeq peptide;Acc:NP_001253363]	Diploid	Diploid
ENSG00000100228	RAB36	RAB36, member RAS oncogene family [Source:HGNC Symbol;Acc:9775]	ENSMMUG00000015204	RAB36	RAB36, member RAS oncogene family [Source:HGNC Symbol;Acc:HGNC:9775]	Diploid	Diploid
ENSG00000160602	NEK8	NIMA-related kinase 8 [Source:HGNC Symbol;Acc:13387]	ENSMMUG00000030250	NEK8	NIMA related kinase 8 [Source:HGNC Symbol;Acc:HGNC:13387]	Diploid	Diploid
ENSG00000169327	OR5AU1	olfactory receptor, family 5, subfamily AU, member 1 [Source:HGNC Symbol;Acc:15362]	ENSMMUG00000006465	OR5AU1	olfactory receptor family 5 subfamily AU member 1 [Source:HGNC Symbol;Acc:HGNC:15362]	Diploid	Diploid
ENSG00000185985	SLITRK2	SLIT and NTRK-like family, member 2 [Source:HGNC Symbol;Acc:13449]	ENSMMUG00000009719	SLITRK2	SLIT and NTRK like family member 2 [Source:HGNC Symbol;Acc:HGNC:13449]	Diploid	Diploid
ENSG00000147124	ZNF41	zinc finger protein 41 [Source:HGNC Symbol;Acc:13107]	ENSMMUG00000010404			Diploid	Diploid
ENSG00000164692	COL1A2	collagen, type I, alpha 2 [Source:HGNC Symbol;Acc:2198]	ENSMMUG00000039654	COL1A2	collagen type I alpha 2 chain [Source:HGNC Symbol;Acc:HGNC:2198]	Diploid	Diploid
ENSG00000196152	ZNF79	zinc finger protein 79 [Source:HGNC Symbol;Acc:13153]	ENSMMUG00000021760	ZNF79	zinc finger protein 79 [Source:HGNC Symbol;Acc:HGNC:13153]	Diploid	Diploid
ENSG00000157227	MMP14	matrix metallopeptidase 14 (membrane-inserted) [Source:HGNC Symbol;Acc:7160]	ENSMMUG00000013665	MMP14	matrix metalloproteinase-14 precursor [Source:RefSeq peptide;Acc:NP_001253739]	Diploid	Diploid
ENSG00000218819	TDRD15	tudor domain containing 15 [Source:HGNC Symbol;Acc:45037]	ENSMMUG00000048513	TDRD15	tudor domain containing 15 [Source:HGNC Symbol;Acc:HGNC:45037]	Diploid	Diploid
ENSG00000048740	CELF2	CUGBP, Elav-like family member 2 [Source:HGNC Symbol;Acc:2550]	ENSMMUG00000037449	CELF2	CUGBP Elav-like family member 2 [Source:HGNC Symbol;Acc:HGNC:2550]	Diploid	Diploid
ENSG00000120658	ENOX1	ecto-NOX disulfide-thiol exchanger 1 [Source:HGNC Symbol;Acc:25474]	ENSMMUG00000002330	ENOX1	ecto-NOX disulfide-thiol exchanger 1 [Source:HGNC Symbol;Acc:HGNC:25474]	Diploid	Diploid
ENSG00000105610	KLF1	Kruppel-like factor 1 (erythroid) [Source:HGNC Symbol;Acc:6345]	ENSMMUG00000011230	KLF1	Kruppel like factor 1 [Source:HGNC Symbol;Acc:HGNC:6345]	Diploid	Diploid
ENSG00000196843	ARID5A	AT rich interactive domain 5A (MRF1-like) [Source:HGNC Symbol;Acc:17361]	ENSMMUG00000030744	ARID5A	AT-rich interaction domain 5A [Source:HGNC Symbol;Acc:HGNC:17361]	Diploid	Diploid
ENSG00000147138	GPR174	G protein-coupled receptor 174 [Source:HGNC Symbol;Acc:30245]	ENSMMUG00000047442	GPR174	G protein-coupled receptor 174 [Source:HGNC Symbol;Acc:HGNC:30245]	Diploid	Diploid
ENSG00000204564	C6orf136	chromosome 6 open reading frame 136 [Source:HGNC Symbol;Acc:21301]	ENSMMUG00000019959	C6orf136	chromosome 6 open reading frame 136 [Source:HGNC Symbol;Acc:HGNC:21301]	Diploid	Diploid
ENSG00000125354	SEPT6	septin 6 [Source:HGNC Symbol;Acc:15848]	ENSMMUG00000017669	SEPT6	septin 6 [Source:HGNC Symbol;Acc:HGNC:15848]	Diploid	Diploid
ENSG00000198873	GRK5	G protein-coupled receptor kinase 5 [Source:HGNC Symbol;Acc:4544]	ENSMMUG00000004596	GRK5	G protein-coupled receptor kinase 5 [Source:HGNC Symbol;Acc:HGNC:4544]	Diploid	Diploid
ENSG00000108375	RNF43	ring finger protein 43 [Source:HGNC Symbol;Acc:18505]	ENSMMUG00000007004	RNF43	ring finger protein 43 [Source:HGNC Symbol;Acc:HGNC:18505]	Diploid	Diploid
ENSG00000036448	MYOM2	myomesin 2 [Source:HGNC Symbol;Acc:7614]	ENSMMUG00000023408	MYOM2	myomesin 2 [Source:HGNC Symbol;Acc:HGNC:7614]	Diploid	Diploid
ENSG00000123989	CHPF	chondroitin polymerizing factor [Source:HGNC Symbol;Acc:24291]	ENSMMUG00000013242	CHPF	chondroitin polymerizing factor [Source:HGNC Symbol;Acc:HGNC:24291]	Diploid	Diploid
ENSG00000127084	FGD3	FYVE, RhoGEF and PH domain containing 3 [Source:HGNC Symbol;Acc:16027]	ENSMMUG00000020795	FGD3	FYVE, RhoGEF and PH domain containing 3 [Source:HGNC Symbol;Acc:HGNC:16027]	Diploid	Diploid
ENSG00000160883	HK3	hexokinase 3 (white cell) [Source:HGNC Symbol;Acc:4925]	ENSMMUG00000002653	HK3	hexokinase 3 [Source:HGNC Symbol;Acc:HGNC:4925]	Diploid	Diploid
ENSG00000204560	DHX16	DEAH (Asp-Glu-Ala-His) box polypeptide 16 [Source:HGNC Symbol;Acc:2739]	ENSMMUG00000019960	DHX16	DEAH-box helicase 16 [Source:HGNC Symbol;Acc:HGNC:2739]	Diploid	Diploid
ENSG00000125538	IL1B	interleukin 1, beta [Source:HGNC Symbol;Acc:5992]	ENSMMUG00000042751	IL1B	interleukin 1 beta [Source:HGNC Symbol;Acc:HGNC:5992]	Diploid	Diploid
ENSG00000182359	KBTBD3	kelch repeat and BTB (POZ) domain containing 3 [Source:HGNC Symbol;Acc:22934]	ENSMMUG00000010989	KBTBD3	kelch repeat and BTB domain containing 3 [Source:HGNC Symbol;Acc:HGNC:22934]	Diploid	Diploid
ENSG00000169689	STRA13	stimulated by retinoic acid 13 [Source:HGNC Symbol;Acc:11422]	ENSMMUG00000010890	CENPX	centromere protein X [Source:HGNC Symbol;Acc:HGNC:11422]	Diploid	Diploid
ENSG00000113763	UNC5A	unc-5 homolog A (C. elegans) [Source:HGNC Symbol;Acc:12567]	ENSMMUG00000002649	UNC5A	unc-5 netrin receptor A [Source:HGNC Symbol;Acc:HGNC:12567]	Diploid	Diploid
ENSG00000138376	BARD1	BRCA1 associated RING domain 1 [Source:HGNC Symbol;Acc:952]	ENSMMUG00000005700	BARD1	BRCA1 associated RING domain 1 [Source:HGNC Symbol;Acc:HGNC:952]	Diploid	Diploid
ENSG00000213246	SUPT4H1	suppressor of Ty 4 homolog 1 (S. cerevisiae) [Source:HGNC Symbol;Acc:11467]	ENSMMUG00000040655	SUPT4H1	SPT4 homolog, DSIF elongation factor subunit [Source:HGNC Symbol;Acc:HGNC:11467]	Diploid	Diploid
ENSG00000136816	TOR1B	torsin family 1, member B (torsin B) [Source:HGNC Symbol;Acc:11995]	ENSMMUG00000003793	TOR1B	torsin family 1 member B [Source:HGNC Symbol;Acc:HGNC:11995]	Diploid	Diploid
ENSG00000178404	DDC8	Protein DDC8 homolog [Source:UniProtKB/Swiss-Prot;Acc:Q96MC4]	ENSMMUG00000003495	CEP295NL	CEP295 N-terminal like [Source:HGNC Symbol;Acc:HGNC:44659]	Diploid	Diploid
ENSG00000035862	TIMP2	TIMP metallopeptidase inhibitor 2 [Source:HGNC Symbol;Acc:11821]	ENSMMUG00000005355	TIMP2	TIMP metallopeptidase inhibitor 2 [Source:HGNC Symbol;Acc:HGNC:11821]	Diploid	Diploid
ENSG00000140932	CMTM2	CKLF-like MARVEL transmembrane domain containing 2 [Source:HGNC Symbol;Acc:19173]	ENSMMUG00000000032	CMTM2	CKLF like MARVEL transmembrane domain containing 2 [Source:HGNC Symbol;Acc:HGNC:19173]	Diploid	Diploid
ENSG00000178623	GPR35	G protein-coupled receptor 35 [Source:HGNC Symbol;Acc:4492]	ENSMMUG00000015419	GPR35	G protein-coupled receptor 35 [Source:HGNC Symbol;Acc:HGNC:4492]	Diploid	Diploid
ENSG00000204977	TRIM13	tripartite motif containing 13 [Source:HGNC Symbol;Acc:9976]	ENSMMUG00000010898	TRIM13	tripartite motif containing 13 [Source:HGNC Symbol;Acc:HGNC:9976]	Diploid	Diploid
ENSG00000035664	DAPK2	death-associated protein kinase 2 [Source:HGNC Symbol;Acc:2675]	ENSMMUG00000018177	DAPK2	death associated protein kinase 2 [Source:HGNC Symbol;Acc:HGNC:2675]	Diploid	Diploid
ENSG00000074964	ARHGEF10L	Rho guanine nucleotide exchange factor (GEF) 10-like [Source:HGNC Symbol;Acc:25540]	ENSMMUG00000010849	ARHGEF10L	Rho guanine nucleotide exchange factor 10 like [Source:HGNC Symbol;Acc:HGNC:25540]	Diploid	Diploid
ENSG00000164615	CAMLG	calcium modulating ligand [Source:HGNC Symbol;Acc:1471]	ENSMMUG00000041152			Diploid	Diploid
ENSG00000159069	FBXW5	F-box and WD repeat domain containing 5 [Source:HGNC Symbol;Acc:13613]	ENSMMUG00000011528	FBXW5	F-box and WD repeat domain containing 5 [Source:HGNC Symbol;Acc:HGNC:13613]	Diploid	Diploid
ENSG00000125304	TM9SF2	transmembrane 9 superfamily member 2 [Source:HGNC Symbol;Acc:11865]	ENSMMUG00000019556	TM9SF2	transmembrane 9 superfamily member 2 [Source:HGNC Symbol;Acc:HGNC:11865]	Diploid	Diploid
ENSG00000112877	CEP72	centrosomal protein 72kDa [Source:HGNC Symbol;Acc:25547]	ENSMMUG00000003791	CEP72	centrosomal protein 72 [Source:HGNC Symbol;Acc:HGNC:25547]	Diploid	Diploid
ENSG00000144579	CTDSP1	CTD (carboxy-terminal domain, RNA polymerase II, polypeptide A) small phosphatase 1 [Source:HGNC Symbol;Acc:21614]	ENSMMUG00000015268	CTDSP1	carboxy-terminal domain RNA polymerase II polypeptide A small phosphatase 1 [Source:RefSeq peptide;Acc:NP_001180802]	Diploid	Diploid
ENSG00000156475	PPP2R2B	protein phosphatase 2, regulatory subunit B, beta [Source:HGNC Symbol;Acc:9305]	ENSMMUG00000020465	PPP2R2B	protein phosphatase 2 regulatory subunit Bbeta [Source:HGNC Symbol;Acc:HGNC:9305]	Diploid	Diploid
ENSG00000077458	FAM76B	family with sequence similarity 76, member B [Source:HGNC Symbol;Acc:28492]	ENSMMUG00000014792	FAM76B	family with sequence similarity 76 member B [Source:HGNC Symbol;Acc:HGNC:28492]	Diploid	Diploid
ENSG00000123594	ATXN3L	ataxin 3-like [Source:HGNC Symbol;Acc:24173]	ENSMMUG00000009370	ATXN3L	ataxin 3 like [Source:HGNC Symbol;Acc:HGNC:24173]	Diploid	Diploid
ENSG00000118276	B4GALT6	UDP-Gal:betaGlcNAc beta 1,4- galactosyltransferase, polypeptide 6 [Source:HGNC Symbol;Acc:929]	ENSMMUG00000016674	B4GALT6	beta-1,4-galactosyltransferase 6 [Source:HGNC Symbol;Acc:HGNC:929]	Diploid	Diploid
ENSG00000187258	NPSR1	neuropeptide S receptor 1 [Source:HGNC Symbol;Acc:23631]	ENSMMUG00000014226	NPSR1	neuropeptide S receptor 1 [Source:HGNC Symbol;Acc:HGNC:23631]	Diploid	Diploid
ENSG00000161594	KLHL10	kelch-like family member 10 [Source:HGNC Symbol;Acc:18829]	ENSMMUG00000005961	KLHL10	kelch like family member 10 [Source:HGNC Symbol;Acc:HGNC:18829]	Diploid	Diploid
ENSG00000213626	LBH	limb bud and heart development [Source:HGNC Symbol;Acc:29532]	ENSMMUG00000043556			Diploid	Diploid
ENSG00000175538	KCNE3	potassium voltage-gated channel, Isk-related family, member 3 [Source:HGNC Symbol;Acc:6243]	ENSMMUG00000005450	KCNE3	potassium voltage-gated channel subfamily E regulatory subunit 3 [Source:HGNC Symbol;Acc:HGNC:6243]	Diploid	Diploid
ENSG00000187555	USP7	ubiquitin specific peptidase 7 (herpes virus-associated) [Source:HGNC Symbol;Acc:12630]	ENSMMUG00000047388	USP7	ubiquitin specific peptidase 7 [Source:HGNC Symbol;Acc:HGNC:12630]	Diploid	Diploid
ENSG00000161551	ZNF577	zinc finger protein 577 [Source:HGNC Symbol;Acc:28673]	ENSMMUG00000002310	ZNF577	zinc finger protein 577 [Source:HGNC Symbol;Acc:HGNC:28673]	Diploid	Diploid
ENSG00000163516	ANKZF1	ankyrin repeat and zinc finger domain containing 1 [Source:HGNC Symbol;Acc:25527]	ENSMMUG00000014510	ANKZF1	ankyrin repeat and zinc finger domain containing 1 [Source:HGNC Symbol;Acc:HGNC:25527]	Diploid	Diploid
ENSG00000132463	GRSF1	G-rich RNA sequence binding factor 1 [Source:HGNC Symbol;Acc:4610]	ENSMMUG00000000380	GRSF1	G-rich RNA sequence binding factor 1 [Source:HGNC Symbol;Acc:HGNC:4610]	Diploid	Diploid
ENSG00000105552	BCAT2	branched chain amino-acid transaminase 2, mitochondrial [Source:HGNC Symbol;Acc:977]	ENSMMUG00000010079	BCAT2	branched chain amino acid transaminase 2 [Source:HGNC Symbol;Acc:HGNC:977]	Diploid	Diploid
ENSG00000186143	C2orf53	chromosome 2 open reading frame 53 [Source:HGNC Symbol;Acc:28677]	ENSMMUG00000002393	PRR30	proline rich 30 [Source:HGNC Symbol;Acc:HGNC:28677]	Diploid	Diploid
ENSG00000068400	GRIPAP1	GRIP1 associated protein 1 [Source:HGNC Symbol;Acc:18706]	ENSMMUG00000020059	GRIPAP1	GRIP1 associated protein 1 [Source:HGNC Symbol;Acc:HGNC:18706]	Diploid	Diploid
ENSG00000166037	CEP57	centrosomal protein 57kDa [Source:HGNC Symbol;Acc:30794]	ENSMMUG00000014796	CEP57	centrosomal protein 57 [Source:HGNC Symbol;Acc:HGNC:30794]	Diploid	Diploid
ENSG00000107862	GBF1	golgi brefeldin A resistant guanine nucleotide exchange factor 1 [Source:HGNC Symbol;Acc:4181]	ENSMMUG00000002985	GBF1	golgi brefeldin A resistant guanine nucleotide exchange factor 1 [Source:HGNC Symbol;Acc:HGNC:4181]	Diploid	Diploid
ENSG00000125970	RALY	RALY heterogeneous nuclear ribonucleoprotein [Source:HGNC Symbol;Acc:15921]	ENSMMUG00000018093	RALY	RALY heterogeneous nuclear ribonucleoprotein [Source:HGNC Symbol;Acc:HGNC:15921]	Diploid	Diploid
ENSG00000136813	KIAA0368	KIAA0368 [Source:HGNC Symbol;Acc:29020]	ENSMMUG00000016315	KIAA0368	KIAA0368 [Source:HGNC Symbol;Acc:HGNC:29020]	Diploid	Diploid
ENSG00000163792	TCF23	transcription factor 23 [Source:HGNC Symbol;Acc:18602]	ENSMMUG00000015867	TCF23	transcription factor 23 [Source:HGNC Symbol;Acc:HGNC:18602]	Diploid	Diploid
ENSG00000130701	RBBP8NL	RBBP8 N-terminal like [Source:HGNC Symbol;Acc:16144]	ENSMMUG00000020933	RBBP8NL	RBBP8 N-terminal like [Source:HGNC Symbol;Acc:HGNC:16144]	Diploid	Diploid
ENSG00000187626	ZKSCAN4	zinc finger with KRAB and SCAN domains 4 [Source:HGNC Symbol;Acc:13854]	ENSMMUG00000047120	ZKSCAN4	zinc finger with KRAB and SCAN domains 4 [Source:HGNC Symbol;Acc:HGNC:13854]	Diploid	Diploid
ENSG00000105726	ATP13A1	ATPase type 13A1 [Source:HGNC Symbol;Acc:24215]	ENSMMUG00000043400	ATP13A1	ATPase 13A1 [Source:HGNC Symbol;Acc:HGNC:24215]	Diploid	Diploid
ENSG00000157856	DRC1	dynein regulatory complex subunit 1 homolog (Chlamydomonas) [Source:HGNC Symbol;Acc:24245]	ENSMMUG00000014289	DRC1	dynein regulatory complex subunit 1 [Source:HGNC Symbol;Acc:HGNC:24245]	Diploid	Diploid
ENSG00000169762	TAPT1	transmembrane anterior posterior transformation 1 [Source:HGNC Symbol;Acc:26887]	ENSMMUG00000001747	TAPT1	transmembrane anterior posterior transformation 1 [Source:RefSeq peptide;Acc:NP_001253518]	Diploid	Diploid
ENSG00000078596	ITM2A	integral membrane protein 2A [Source:HGNC Symbol;Acc:6173]	ENSMMUG00000003564	ITM2A	integral membrane protein 2A [Source:HGNC Symbol;Acc:HGNC:6173]	Diploid	Diploid
ENSG00000186088	GSAP	gamma-secretase activating protein [Source:HGNC Symbol;Acc:28042]	ENSMMUG00000006701	GSAP	gamma-secretase activating protein [Source:HGNC Symbol;Acc:HGNC:28042]	Diploid	Diploid
ENSG00000171051	FPR1	formyl peptide receptor 1 [Source:HGNC Symbol;Acc:3826]	ENSMMUG00000013049	FPR1	formyl peptide receptor 1 [Source:HGNC Symbol;Acc:HGNC:3826]	Diploid	Diploid
ENSG00000165591	FAAH2	fatty acid amide hydrolase 2 [Source:HGNC Symbol;Acc:26440]	ENSMMUG00000016725	FAAH2	fatty acid amide hydrolase 2 [Source:HGNC Symbol;Acc:HGNC:26440]	Diploid	Diploid
ENSG00000143797	MBOAT2	membrane bound O-acyltransferase domain containing 2 [Source:HGNC Symbol;Acc:25193]	ENSMMUG00000021037	MBOAT2	membrane bound O-acyltransferase domain containing 2 [Source:HGNC Symbol;Acc:HGNC:25193]	Diploid	Diploid
ENSG00000198093	ZNF649	zinc finger protein 649 [Source:HGNC Symbol;Acc:25741]	ENSMMUG00000037468	ZNF649	zinc finger protein 649 [Source:HGNC Symbol;Acc:HGNC:25741]	Diploid	Diploid
ENSG00000165646	SLC18A2	solute carrier family 18 (vesicular monoamine transporter), member 2 [Source:HGNC Symbol;Acc:10935]	ENSMMUG00000014817	SLC18A2	solute carrier family 18 member A2 [Source:HGNC Symbol;Acc:HGNC:10935]	Diploid	Diploid
ENSG00000129521	EGLN3	egl-9 family hypoxia-inducible factor 3 [Source:HGNC Symbol;Acc:14661]	ENSMMUG00000000040	EGLN3	egl-9 family hypoxia inducible factor 3 [Source:HGNC Symbol;Acc:HGNC:14661]	Diploid	Diploid
ENSG00000122145	TBX22	T-box 22 [Source:HGNC Symbol;Acc:11600]	ENSMMUG00000009102	TBX22	T-box 22 [Source:HGNC Symbol;Acc:HGNC:11600]	Diploid	Diploid
ENSG00000134575	ACP2	acid phosphatase 2, lysosomal [Source:HGNC Symbol;Acc:123]	ENSMMUG00000015597	ACP2	acid phosphatase 2, lysosomal [Source:HGNC Symbol;Acc:HGNC:123]	Diploid	Diploid
ENSG00000154217	PITPNC1	phosphatidylinositol transfer protein, cytoplasmic 1 [Source:HGNC Symbol;Acc:21045]	ENSMMUG00000002133	PITPNC1	phosphatidylinositol transfer protein, cytoplasmic 1 [Source:HGNC Symbol;Acc:HGNC:21045]	Diploid	Diploid
ENSG00000115661	STK16	serine/threonine kinase 16 [Source:HGNC Symbol;Acc:11394]	ENSMMUG00000019626	STK16	serine/threonine kinase 16 [Source:HGNC Symbol;Acc:HGNC:11394]	Diploid	Diploid
ENSG00000177380	PPFIA3	protein tyrosine phosphatase, receptor type, f polypeptide (PTPRF), interacting protein (liprin), alpha 3 [Source:HGNC Symbol;Acc:9247]	ENSMMUG00000007533	PPFIA3	PTPRF interacting protein alpha 3 [Source:HGNC Symbol;Acc:HGNC:9247]	Diploid	Diploid
ENSG00000214941	ZSWIM7	zinc finger, SWIM-type containing 7 [Source:HGNC Symbol;Acc:26993]	ENSMMUG00000030294	ZSWIM7	zinc finger SWIM-type containing 7 [Source:HGNC Symbol;Acc:HGNC:26993]	Diploid	Diploid
ENSG00000115507	OTX1	orthodenticle homeobox 1 [Source:HGNC Symbol;Acc:8521]	ENSMMUG00000016676	OTX1	orthodenticle homeobox 1 [Source:HGNC Symbol;Acc:HGNC:8521]	Diploid	Diploid
ENSG00000125430	HS3ST3B1	heparan sulfate (glucosamine) 3-O-sulfotransferase 3B1 [Source:HGNC Symbol;Acc:5198]	ENSMMUG00000008050	HS3ST3B1	heparan sulfate glucosamine 3-O-sulfotransferase 3A1 [Source:RefSeq peptide;Acc:NP_001181572]	Diploid	Diploid
ENSG00000127951	FGL2	fibrinogen-like 2 [Source:HGNC Symbol;Acc:3696]	ENSMMUG00000002737	FGL2	fibrinogen like 2 [Source:HGNC Symbol;Acc:HGNC:3696]	Diploid	Diploid
ENSG00000165650	PDZD8	PDZ domain containing 8 [Source:HGNC Symbol;Acc:26974]	ENSMMUG00000047831			Diploid	Diploid
ENSG00000036672	USP2	ubiquitin specific peptidase 2 [Source:HGNC Symbol;Acc:12618]	ENSMMUG00000008921	USP2	ubiquitin specific peptidase 2 [Source:HGNC Symbol;Acc:HGNC:12618]	Diploid	Diploid
ENSG00000082269	FAM135A	family with sequence similarity 135, member A [Source:HGNC Symbol;Acc:21084]	ENSMMUG00000009060	FAM135A	family with sequence similarity 135 member A [Source:HGNC Symbol;Acc:HGNC:21084]	Diploid	Diploid
ENSG00000110244	APOA4	apolipoprotein A-IV [Source:HGNC Symbol;Acc:602]	ENSMMUG00000016125	APOA4	apolipoprotein A4 [Source:HGNC Symbol;Acc:HGNC:602]	Diploid	Diploid
ENSG00000103335	PIEZO1	piezo-type mechanosensitive ion channel component 1 [Source:HGNC Symbol;Acc:28993]	ENSMMUG00000007254	PIEZO1	piezo type mechanosensitive ion channel component 1 [Source:HGNC Symbol;Acc:HGNC:28993]	Diploid	Diploid
ENSG00000078061	ARAF	v-raf murine sarcoma 3611 viral oncogene homolog [Source:HGNC Symbol;Acc:646]	ENSMMUG00000011418	ARAF	A-Raf proto-oncogene, serine/threonine kinase [Source:HGNC Symbol;Acc:HGNC:646]	Diploid	Diploid
ENSG00000167962	ZNF598	zinc finger protein 598 [Source:HGNC Symbol;Acc:28079]	ENSMMUG00000029265	ZNF598	zinc finger protein 598 [Source:HGNC Symbol;Acc:HGNC:28079]	Diploid	Diploid
ENSG00000110245	APOC3	apolipoprotein C-III [Source:HGNC Symbol;Acc:610]	ENSMMUG00000016126	APOC3	apolipoprotein C3 [Source:HGNC Symbol;Acc:HGNC:610]	Diploid	Diploid
ENSG00000176919	C8G	complement component 8, gamma polypeptide [Source:HGNC Symbol;Acc:1354]	ENSMMUG00000032142	C8G	complement C8 gamma chain [Source:HGNC Symbol;Acc:HGNC:1354]	Diploid	Diploid
ENSG00000157303	SUSD3	sushi domain containing 3 [Source:HGNC Symbol;Acc:28391]	ENSMMUG00000013691	SUSD3	sushi domain containing 3 [Source:HGNC Symbol;Acc:HGNC:28391]	Diploid	Diploid
ENSG00000078900	TP73	tumor protein p73 [Source:HGNC Symbol;Acc:12003]	ENSMMUG00000016569	TP73	tumor protein p73 [Source:HGNC Symbol;Acc:HGNC:12003]	Diploid	Diploid
ENSG00000137216	TMEM63B	transmembrane protein 63B [Source:HGNC Symbol;Acc:17735]	ENSMMUG00000016230	TMEM63B	transmembrane protein 63B [Source:HGNC Symbol;Acc:HGNC:17735]	Diploid	Diploid
ENSG00000163521	GLB1L	galactosidase, beta 1-like [Source:HGNC Symbol;Acc:28129]	ENSMMUG00000019624	GLB1L	galactosidase beta 1 like [Source:HGNC Symbol;Acc:HGNC:28129]	Diploid	Diploid
ENSG00000164330	EBF1	early B-cell factor 1 [Source:HGNC Symbol;Acc:3126]	ENSMMUG00000021696	EBF1	early B-cell factor 1 [Source:HGNC Symbol;Acc:HGNC:3126]	Diploid	Diploid
ENSG00000147383	NSDHL	NAD(P) dependent steroid dehydrogenase-like [Source:HGNC Symbol;Acc:13398]	ENSMMUG00000013176	NSDHL	NAD(P) dependent steroid dehydrogenase-like [Source:HGNC Symbol;Acc:HGNC:13398]	Diploid	Diploid
ENSG00000126759	CFP	complement factor properdin [Source:HGNC Symbol;Acc:8864]	ENSMMUG00000032465	CFP	complement factor properdin [Source:HGNC Symbol;Acc:HGNC:8864]	Diploid	Diploid
ENSG00000114841	DNAH1	dynein, axonemal, heavy chain 1 [Source:HGNC Symbol;Acc:2940]	ENSMMUG00000016974			Diploid	Diploid
ENSG00000112699	GMDS	GDP-mannose 4,6-dehydratase [Source:HGNC Symbol;Acc:4369]	ENSMMUG00000005779	GMDS	GDP-mannose 4,6-dehydratase [Source:HGNC Symbol;Acc:HGNC:4369]	Diploid	Diploid
ENSG00000146006	LRRTM2	leucine rich repeat transmembrane neuronal 2 [Source:HGNC Symbol;Acc:19409]	ENSMMUG00000017990	LRRTM2	leucine rich repeat transmembrane neuronal 2 [Source:HGNC Symbol;Acc:HGNC:19409]	Diploid	Diploid
ENSG00000111671	SPSB2	splA/ryanodine receptor domain and SOCS box containing 2 [Source:HGNC Symbol;Acc:29522]	ENSMMUG00000044556	SPSB2	splA/ryanodine receptor domain and SOCS box containing 2 [Source:HGNC Symbol;Acc:HGNC:29522]	Diploid	Diploid
ENSG00000144452	ABCA12	ATP-binding cassette, sub-family A (ABC1), member 12 [Source:HGNC Symbol;Acc:14637]	ENSMMUG00000014813	ABCA12	ATP binding cassette subfamily A member 12 [Source:HGNC Symbol;Acc:HGNC:14637]	Diploid	Diploid
ENSG00000182272	B4GALNT4	beta-1,4-N-acetyl-galactosaminyl transferase 4 [Source:HGNC Symbol;Acc:26315]	ENSMMUG00000021723	B4GALNT4	beta-1,4-N-acetyl-galactosaminyltransferase 4 [Source:HGNC Symbol;Acc:HGNC:26315]	Diploid	Diploid
ENSG00000137392	CLPS	colipase, pancreatic [Source:HGNC Symbol;Acc:2085]	ENSMMUG00000015384	CLPS	colipase [Source:HGNC Symbol;Acc:HGNC:2085]	CNV as a whole	Diploid
ENSG00000102265	TIMP1	TIMP metallopeptidase inhibitor 1 [Source:HGNC Symbol;Acc:11820]	ENSMMUG00000011426	TIMP1	Metalloproteinase inhibitor 1 [Source:UniProtKB/Swiss-Prot;Acc:Q95KL9]	Diploid	Diploid
ENSG00000176472	ZNF575	zinc finger protein 575 [Source:HGNC Symbol;Acc:27606]	ENSMMUG00000019265	ZNF575	zinc finger protein 575 [Source:HGNC Symbol;Acc:HGNC:27606]	Diploid	Diploid
ENSG00000198876	DCAF12	DDB1 and CUL4 associated factor 12 [Source:HGNC Symbol;Acc:19911]	ENSMMUG00000017458	DCAF12	DDB1 and CUL4 associated factor 12 [Source:HGNC Symbol;Acc:HGNC:19911]	Diploid	Diploid
ENSG00000072315	TRPC5	transient receptor potential cation channel, subfamily C, member 5 [Source:HGNC Symbol;Acc:12337]	ENSMMUG00000010424	TRPC5	transient receptor potential cation channel subfamily C member 5 [Source:HGNC Symbol;Acc:HGNC:12337]	Diploid	Diploid
ENSG00000179772	FOXS1	forkhead box S1 [Source:HGNC Symbol;Acc:3735]	ENSMMUG00000000969	FOXS1	forkhead box S1 [Source:HGNC Symbol;Acc:HGNC:3735]	Diploid	Diploid
ENSG00000166171	DPCD	deleted in primary ciliary dyskinesia homolog (mouse) [Source:HGNC Symbol;Acc:24542]	ENSMMUG00000006751	DPCD	deleted in primary ciliary dyskinesia homolog (mouse) [Source:HGNC Symbol;Acc:HGNC:24542]	Diploid	Diploid
ENSG00000174016	FAM46D	family with sequence similarity 46, member D [Source:HGNC Symbol;Acc:28399]	ENSMMUG00000043822	FAM46D	family with sequence similarity 46 member D [Source:HGNC Symbol;Acc:HGNC:28399]	Diploid	Diploid
ENSG00000085377	PREP	prolyl endopeptidase [Source:HGNC Symbol;Acc:9358]	ENSMMUG00000013483	PREP	prolyl endopeptidase [Source:HGNC Symbol;Acc:HGNC:9358]	Diploid	Diploid
ENSG00000180992	MRPL14	mitochondrial ribosomal protein L14 [Source:HGNC Symbol;Acc:14279]	ENSMMUG00000011452			Diploid	Diploid
ENSG00000174177	CTU2	cytosolic thiouridylase subunit 2 homolog (S. pombe) [Source:HGNC Symbol;Acc:28005]	ENSMMUG00000007251	CTU2	cytosolic thiouridylase subunit 2 [Source:HGNC Symbol;Acc:HGNC:28005]	Diploid	Diploid
ENSG00000008056	SYN1	synapsin I [Source:HGNC Symbol;Acc:11494]	ENSMMUG00000011420	SYN1	synapsin I [Source:HGNC Symbol;Acc:HGNC:11494]	Diploid	Diploid
ENSG00000089682	RBM41	RNA binding motif protein 41 [Source:HGNC Symbol;Acc:25617]	ENSMMUG00000023172	RBM41	RNA-binding protein 41 [Source:RefSeq peptide;Acc:NP_001247510]	Diploid	Diploid
ENSG00000108840	HDAC5	histone deacetylase 5 [Source:HGNC Symbol;Acc:14068]	ENSMMUG00000006806	HDAC5	histone deacetylase 5 [Source:HGNC Symbol;Acc:HGNC:14068]	Diploid	Diploid
ENSG00000126264	HCST	hematopoietic cell signal transducer [Source:HGNC Symbol;Acc:16977]	ENSMMUG00000019758	HCST	hematopoietic cell signal transducer [Source:HGNC Symbol;Acc:HGNC:16977]	Diploid	Diploid
ENSG00000101680	LAMA1	laminin, alpha 1 [Source:HGNC Symbol;Acc:6481]	ENSMMUG00000011408	LAMA1	laminin subunit alpha 1 [Source:HGNC Symbol;Acc:HGNC:6481]	Diploid	Diploid
ENSG00000186648	LRRC16B	leucine rich repeat containing 16B [Source:HGNC Symbol;Acc:20272]	ENSMMUG00000007357	CARMIL3	capping protein regulator and myosin 1 linker 3 [Source:HGNC Symbol;Acc:HGNC:20272]	Diploid	Diploid
ENSG00000101470	TNNC2	troponin C type 2 (fast) [Source:HGNC Symbol;Acc:11944]	ENSMMUG00000021025	TNNC2	troponin C2, fast skeletal type [Source:HGNC Symbol;Acc:HGNC:11944]	Diploid	Diploid
ENSG00000022267	FHL1	four and a half LIM domains 1 [Source:HGNC Symbol;Acc:3702]	ENSMMUG00000007922	FHL1	four and a half LIM domains 1 [Source:HGNC Symbol;Acc:HGNC:3702]	Diploid	Diploid
ENSG00000077463	SIRT6	sirtuin 6 [Source:HGNC Symbol;Acc:14934]	ENSMMUG00000019955	SIRT6	sirtuin 6 [Source:HGNC Symbol;Acc:HGNC:14934]	Diploid	Diploid
ENSG00000166169	POLL	polymerase (DNA directed), lambda [Source:HGNC Symbol;Acc:9184]	ENSMMUG00000006747			Diploid	Diploid
ENSG00000111674	ENO2	enolase 2 (gamma, neuronal) [Source:HGNC Symbol;Acc:3353]	ENSMMUG00000009443	ENO2	enolase 2 [Source:HGNC Symbol;Acc:HGNC:3353]	Diploid	Diploid
ENSG00000167604	NFKBID	nuclear factor of kappa light polypeptide gene enhancer in B-cells inhibitor, delta [Source:HGNC Symbol;Acc:15671]	ENSMMUG00000019756	NFKBID	NFKB inhibitor delta [Source:HGNC Symbol;Acc:HGNC:15671]	Diploid	Diploid
ENSG00000136271	DDX56	DEAD (Asp-Glu-Ala-Asp) box helicase 56 [Source:HGNC Symbol;Acc:18193]	ENSMMUG00000002645	DDX56	DEAD-box helicase 56 [Source:HGNC Symbol;Acc:HGNC:18193]	Diploid	Diploid
ENSG00000161031	PGLYRP2	peptidoglycan recognition protein 2 [Source:HGNC Symbol;Acc:30013]	ENSMMUG00000003031	PGLYRP2	peptidoglycan recognition protein 2 [Source:HGNC Symbol;Acc:HGNC:30013]	Diploid	Diploid
ENSG00000043591	ADRB1	adrenoceptor beta 1 [Source:HGNC Symbol;Acc:285]	ENSMMUG00000044756	ADRB1	adrenoceptor beta 1 [Source:HGNC Symbol;Acc:HGNC:285]	Diploid	Diploid
ENSG00000169885	CALML6	calmodulin-like 6 [Source:HGNC Symbol;Acc:24193]	ENSMMUG00000012392	CALML6	calmodulin like 6 [Source:HGNC Symbol;Acc:HGNC:24193]	Diploid	Diploid
ENSG00000113552	GNPDA1	glucosamine-6-phosphate deaminase 1 [Source:HGNC Symbol;Acc:4417]	ENSMMUG00000009770	GNPDA1	glucosamine-6-phosphate isomerase 1 [Source:RefSeq peptide;Acc:NP_001244873]	Diploid	Diploid
ENSG00000130307	USHBP1	Usher syndrome 1C binding protein 1 [Source:HGNC Symbol;Acc:24058]	ENSMMUG00000013924	USHBP1	USH1 protein network component harmonin binding protein 1 [Source:HGNC Symbol;Acc:HGNC:24058]	Diploid	Diploid
ENSG00000169249	ZRSR2	zinc finger (CCCH type), RNA-binding motif and serine/arginine rich 2 [Source:HGNC Symbol;Acc:23019]	ENSMMUG00000042951			Diploid	Duplicated and fixed as a whole
ENSG00000189367	KIAA0408	KIAA0408 [Source:HGNC Symbol;Acc:21636]	ENSMMUG00000048882	KIAA0408	KIAA0408 [Source:HGNC Symbol;Acc:HGNC:21636]	Diploid	Diploid
ENSG00000188523	C9orf171	chromosome 9 open reading frame 171 [Source:HGNC Symbol;Acc:33776]	ENSMMUG00000004588	CFAP77	cilia and flagella associated protein 77 [Source:HGNC Symbol;Acc:HGNC:33776]	Diploid	Diploid
ENSG00000131094	C1QL1	complement component 1, q subcomponent-like 1 [Source:HGNC Symbol;Acc:24182]	ENSMMUG00000011009	C1QL1	complement C1q like 1 [Source:HGNC Symbol;Acc:HGNC:24182]	Diploid	Diploid
ENSG00000181904	C5orf24	chromosome 5 open reading frame 24 [Source:HGNC Symbol;Acc:26746]	ENSMMUG00000004013	C5orf24	chromosome 5 open reading frame 24 [Source:HGNC Symbol;Acc:HGNC:26746]	Diploid	Diploid
ENSG00000125571	IL37	interleukin 37 [Source:HGNC Symbol;Acc:15563]	ENSMMUG00000005922	IL37	interleukin 37 [Source:HGNC Symbol;Acc:HGNC:15563]	Diploid	Diploid
ENSG00000099834	CDHR5	cadherin-related family member 5 [Source:HGNC Symbol;Acc:7521]	ENSMMUG00000004024	CDHR5	cadherin related family member 5 [Source:HGNC Symbol;Acc:HGNC:7521]	Diploid	Diploid
ENSG00000185313	SCN10A	sodium channel, voltage-gated, type X, alpha subunit [Source:HGNC Symbol;Acc:10582]	ENSMMUG00000015827	SCN10A	sodium voltage-gated channel alpha subunit 10 [Source:HGNC Symbol;Acc:HGNC:10582]	Diploid	Diploid
ENSG00000152402	GUCY1A2	guanylate cyclase 1, soluble, alpha 2 [Source:HGNC Symbol;Acc:4684]	ENSMMUG00000013419	GUCY1A2	guanylate cyclase 1 soluble subunit alpha 2 [Source:HGNC Symbol;Acc:HGNC:4684]	Diploid	Diploid
ENSG00000140931	CMTM3	CKLF-like MARVEL transmembrane domain containing 3 [Source:HGNC Symbol;Acc:19174]	ENSMMUG00000020847	CMTM3	CKLF like MARVEL transmembrane domain containing 3 [Source:HGNC Symbol;Acc:HGNC:19174]	Diploid	Diploid
ENSG00000103227	LMF1	lipase maturation factor 1 [Source:HGNC Symbol;Acc:14154]	ENSMMUG00000011133	LMF1	lipase maturation factor 1 [Source:HGNC Symbol;Acc:HGNC:14154]	Diploid	Diploid
ENSG00000170677	SOCS6	suppressor of cytokine signaling 6 [Source:HGNC Symbol;Acc:16833]	ENSMMUG00000012610	SOCS6	suppressor of cytokine signaling 6 [Source:HGNC Symbol;Acc:HGNC:16833]	Diploid	Diploid
ENSG00000103152	MPG	N-methylpurine-DNA glycosylase [Source:HGNC Symbol;Acc:7211]	ENSMMUG00000000589	MPG	N-methylpurine DNA glycosylase [Source:HGNC Symbol;Acc:HGNC:7211]	Diploid	Diploid
ENSG00000176971	FIBIN	fin bud initiation factor homolog (zebrafish) [Source:HGNC Symbol;Acc:33747]	ENSMMUG00000013358	FIBIN	fin bud initiation factor homolog (zebrafish) [Source:HGNC Symbol;Acc:HGNC:33747]	Diploid	Diploid
ENSG00000157551	KCNJ15	potassium inwardly-rectifying channel, subfamily J, member 15 [Source:HGNC Symbol;Acc:6261]	ENSMMUG00000016789	KCNJ15	potassium voltage-gated channel subfamily J member 15 [Source:HGNC Symbol;Acc:HGNC:6261]	Diploid	Diploid
ENSG00000118137	APOA1	apolipoprotein A-I [Source:HGNC Symbol;Acc:600]	ENSMMUG00000044545	APOA1	apolipoprotein A1 [Source:HGNC Symbol;Acc:HGNC:600]	Diploid	Diploid
ENSG00000197324	LRP10	low density lipoprotein receptor-related protein 10 [Source:HGNC Symbol;Acc:14553]	ENSMMUG00000016100	LRP10	low-density lipoprotein receptor-related protein 10 precursor [Source:RefSeq peptide;Acc:NP_001244860]	Diploid	Diploid
ENSG00000175573	C11orf68	chromosome 11 open reading frame 68 [Source:HGNC Symbol;Acc:28801]	ENSMMUG00000008654	C11orf68	chromosome 11 open reading frame 68 [Source:HGNC Symbol;Acc:HGNC:28801]	Diploid	Diploid
ENSG00000149541	B3GAT3	beta-1,3-glucuronyltransferase 3 (glucuronosyltransferase I) [Source:HGNC Symbol;Acc:923]	ENSMMUG00000031126	B3GAT3	beta-1,3-glucuronyltransferase 3 [Source:HGNC Symbol;Acc:HGNC:923]	Diploid	Diploid
ENSG00000169564	PCBP1	poly(rC) binding protein 1 [Source:HGNC Symbol;Acc:8647]	ENSMMUG00000038295	PCBP1	poly(rC) binding protein 1 [Source:HGNC Symbol;Acc:HGNC:8647]	Diploid	Diploid
ENSG00000244617	ASPRV1	aspartic peptidase, retroviral-like 1 [Source:HGNC Symbol;Acc:26321]	ENSMMUG00000009011	ASPRV1	aspartic peptidase retroviral like 1 [Source:HGNC Symbol;Acc:HGNC:26321]	Diploid	Diploid
ENSG00000131759	RARA	retinoic acid receptor, alpha [Source:HGNC Symbol;Acc:9864]	ENSMMUG00000012486	RARA	retinoic acid receptor alpha [Source:HGNC Symbol;Acc:HGNC:9864]	Diploid	Diploid
ENSG00000071539	TRIP13	thyroid hormone receptor interactor 13 [Source:HGNC Symbol;Acc:12307]	ENSMMUG00000014740	TRIP13	thyroid hormone receptor interactor 13 [Source:HGNC Symbol;Acc:HGNC:12307]	Diploid	Diploid
ENSG00000165233	C9orf89	chromosome 9 open reading frame 89 [Source:HGNC Symbol;Acc:28148]	ENSMMUG00000013692	CARD19	caspase recruitment domain family member 19 [Source:HGNC Symbol;Acc:HGNC:28148]	Diploid	Diploid
ENSG00000160584	SIK3	SIK family kinase 3 [Source:HGNC Symbol;Acc:29165]	ENSMMUG00000016128	SIK3	SIK family kinase 3 [Source:HGNC Symbol;Acc:HGNC:29165]	Diploid	Diploid
ENSG00000182287	AP1S2	adaptor-related protein complex 1, sigma 2 subunit [Source:HGNC Symbol;Acc:560]	ENSMMUG00000014055	AP1S2	AP-1 complex subunit sigma-2 [Source:RefSeq peptide;Acc:NP_001181839]	Diploid	Diploid
ENSG00000150281	CTF1	cardiotrophin 1 [Source:HGNC Symbol;Acc:2499]	ENSMMUG00000047302	CTF1	cardiotrophin 1 [Source:HGNC Symbol;Acc:HGNC:2499]	Diploid	Diploid
ENSG00000169972	PUSL1	pseudouridylate synthase-like 1 [Source:HGNC Symbol;Acc:26914]	ENSMMUG00000016279	PUSL1	pseudouridylate synthase-like 1 [Source:HGNC Symbol;Acc:HGNC:26914]	Diploid	Diploid
ENSG00000102572	STK24	serine/threonine kinase 24 [Source:HGNC Symbol;Acc:11403]	ENSMMUG00000009173	STK24	serine/threonine kinase 24 [Source:HGNC Symbol;Acc:HGNC:11403]	Diploid	Diploid
ENSG00000162063	CCNF	cyclin F [Source:HGNC Symbol;Acc:1591]	ENSMMUG00000000001	CCNF	cyclin F [Source:HGNC Symbol;Acc:HGNC:1591]	Diploid	Diploid
ENSG00000102174	PHEX	phosphate regulating endopeptidase homolog, X-linked [Source:HGNC Symbol;Acc:8918]	ENSMMUG00000023589	PHEX	phosphate regulating endopeptidase homolog X-linked [Source:HGNC Symbol;Acc:HGNC:8918]	Diploid	Diploid
ENSG00000111262	KCNA1	potassium voltage-gated channel, shaker-related subfamily, member 1 (episodic ataxia with myokymia) [Source:HGNC Symbol;Acc:6218]	ENSMMUG00000045068	KCNA1	potassium voltage-gated channel subfamily A member 1 [Source:HGNC Symbol;Acc:HGNC:6218]	Diploid	Diploid
ENSG00000183960	KCNH8	potassium voltage-gated channel, subfamily H (eag-related), member 8 [Source:HGNC Symbol;Acc:18864]	ENSMMUG00000005370	KCNH8	potassium voltage-gated channel subfamily H member 8 [Source:HGNC Symbol;Acc:HGNC:18864]	Diploid	Diploid
ENSG00000180061	TMEM150B	transmembrane protein 150B [Source:HGNC Symbol;Acc:34415]	ENSMMUG00000028716	TMEM150B	transmembrane protein 150B [Source:HGNC Symbol;Acc:HGNC:34415]	Diploid	Diploid
ENSG00000100503	NIN	ninein (GSK3B interacting protein) [Source:HGNC Symbol;Acc:14906]	ENSMMUG00000014658	NIN	ninein [Source:HGNC Symbol;Acc:HGNC:14906]	Diploid	Diploid
ENSG00000198759	EGFL6	EGF-like-domain, multiple 6 [Source:HGNC Symbol;Acc:3235]	ENSMMUG00000022615	EGFL6	EGF like domain multiple 6 [Source:HGNC Symbol;Acc:HGNC:3235]	Diploid	Diploid
ENSG00000184925	LCN12	lipocalin 12 [Source:HGNC Symbol;Acc:28733]	ENSMMUG00000021428	LCN12	lipocalin 12 [Source:HGNC Symbol;Acc:HGNC:28733]	Diploid	Diploid
ENSG00000162592	CCDC27	coiled-coil domain containing 27 [Source:HGNC Symbol;Acc:26546]	ENSMMUG00000013591	CCDC27	coiled-coil domain containing 27 [Source:HGNC Symbol;Acc:HGNC:26546]	Diploid	Diploid
ENSG00000103126	AXIN1	axin 1 [Source:HGNC Symbol;Acc:903]	ENSMMUG00000000605	AXIN1	axin 1 [Source:HGNC Symbol;Acc:HGNC:903]	Diploid	Diploid
ENSG00000174851	YIF1A	Yip1 interacting factor homolog A (S. cerevisiae) [Source:HGNC Symbol;Acc:16688]	ENSMMUG00000001403	YIF1A	Yip1 interacting factor homolog A, membrane trafficking protein [Source:HGNC Symbol;Acc:HGNC:16688]	Diploid	Diploid
ENSG00000178802	MPI	mannose phosphate isomerase [Source:HGNC Symbol;Acc:7216]	ENSMMUG00000005227	MPI	mannose phosphate isomerase [Source:HGNC Symbol;Acc:HGNC:7216]	Diploid	Diploid
ENSG00000116044	NFE2L2	nuclear factor, erythroid 2-like 2 [Source:HGNC Symbol;Acc:7782]	ENSMMUG00000001861	NFE2L2	nuclear factor, erythroid 2 like 2 [Source:HGNC Symbol;Acc:HGNC:7782]	Diploid	Diploid
ENSG00000023839	ABCC2	ATP-binding cassette, sub-family C (CFTR/MRP), member 2 [Source:HGNC Symbol;Acc:53]	ENSMMUG00000023764	ABCC2	ATP binding cassette subfamily C member 2 [Source:HGNC Symbol;Acc:HGNC:53]	Diploid	Diploid
ENSG00000184363	PKP3	plakophilin 3 [Source:HGNC Symbol;Acc:9025]	ENSMMUG00000003525			Diploid	Diploid
ENSG00000105519	CAPS	calcyphosine [Source:HGNC Symbol;Acc:1487]	ENSMMUG00000011963	CAPS	calcyphosine [Source:HGNC Symbol;Acc:HGNC:1487]	Diploid	Diploid
ENSG00000088356	PDRG1	p53 and DNA-damage regulated 1 [Source:HGNC Symbol;Acc:16119]	ENSMMUG00000000973	PDRG1	p53 and DNA damage regulated 1 [Source:HGNC Symbol;Acc:HGNC:16119]	Diploid	Diploid
ENSG00000184113	CLDN5	claudin 5 [Source:HGNC Symbol;Acc:2047]	ENSMMUG00000044567	CLDN5	claudin 5 [Source:HGNC Symbol;Acc:HGNC:2047]	Diploid	Diploid
ENSG00000182508	LHFPL1	lipoma HMGIC fusion partner-like 1 [Source:HGNC Symbol;Acc:6587]	ENSMMUG00000000903	LHFPL1	LHFPL tetraspan subfamily member 1 [Source:HGNC Symbol;Acc:HGNC:6587]	Diploid	Diploid
ENSG00000150867	PIP4K2A	phosphatidylinositol-5-phosphate 4-kinase, type II, alpha [Source:HGNC Symbol;Acc:8997]	ENSMMUG00000015034	PIP4K2A	phosphatidylinositol-5-phosphate 4-kinase type 2 alpha [Source:HGNC Symbol;Acc:HGNC:8997]	Diploid	Diploid
ENSG00000196376	SLC35F1	solute carrier family 35, member F1 [Source:HGNC Symbol;Acc:21483]	ENSMMUG00000022354	SLC35F1	solute carrier family 35 member F1 [Source:HGNC Symbol;Acc:HGNC:21483]	Diploid	Diploid
ENSG00000182771	GRID1	glutamate receptor, ionotropic, delta 1 [Source:HGNC Symbol;Acc:4575]	ENSMMUG00000023612	GRID1	glutamate ionotropic receptor delta type subunit 1 [Source:HGNC Symbol;Acc:HGNC:4575]	Diploid	Diploid
ENSG00000136448	NMT1	N-myristoyltransferase 1 [Source:HGNC Symbol;Acc:7857]	ENSMMUG00000013586	NMT1	N-myristoyltransferase 1 [Source:HGNC Symbol;Acc:HGNC:7857]	Diploid	Diploid
ENSG00000105205	CLC	Charcot-Leyden crystal galectin [Source:HGNC Symbol;Acc:2014]	ENSMMUG00000009527	CLC	Charcot-Leyden crystal galectin [Source:HGNC Symbol;Acc:HGNC:2014]	Diploid	CNV as a whole
ENSG00000031823	RANBP3	RAN binding protein 3 [Source:HGNC Symbol;Acc:9850]	ENSMMUG00000011964	RANBP3	RAN binding protein 3 [Source:HGNC Symbol;Acc:HGNC:9850]	Diploid	Diploid
ENSG00000124701	APOBEC2	apolipoprotein B mRNA editing enzyme, catalytic polypeptide-like 2 [Source:HGNC Symbol;Acc:605]	ENSMMUG00000021171	APOBEC2	apolipoprotein B mRNA editing enzyme catalytic subunit 2 [Source:HGNC Symbol;Acc:HGNC:605]	Diploid	Diploid
ENSG00000124596	OARD1	O-acyl-ADP-ribose deacylase 1 [Source:HGNC Symbol;Acc:21257]	ENSMMUG00000021172	C6orf130	O-acyl-ADP-ribose deacylase 1 [Source:HGNC Symbol;Acc:HGNC:21257]	Diploid	Diploid
ENSG00000174871	CNIH2	cornichon family AMPA receptor auxiliary protein 2 [Source:HGNC Symbol;Acc:28744]	ENSMMUG00000006950	CNIH2	cornichon family AMPA receptor auxiliary protein 2 [Source:HGNC Symbol;Acc:HGNC:28744]	Diploid	Diploid
ENSG00000160113	NR2F6	nuclear receptor subfamily 2, group F, member 6 [Source:HGNC Symbol;Acc:7977]	ENSMMUG00000028849	NR2F6	nuclear receptor subfamily 2 group F member 6 [Source:HGNC Symbol;Acc:HGNC:7977]	Diploid	Diploid
ENSG00000119559	C19orf25	chromosome 19 open reading frame 25 [Source:HGNC Symbol;Acc:26711]	ENSMMUG00000003055	C19orf25	chromosome 19 open reading frame 25 [Source:HGNC Symbol;Acc:HGNC:26711]	Diploid	Diploid
ENSG00000126016	AMOT	angiomotin [Source:HGNC Symbol;Acc:17810]	ENSMMUG00000007688	AMOT	angiomotin [Source:HGNC Symbol;Acc:HGNC:17810]	Diploid	Diploid
ENSG00000197177	GPR123	G protein-coupled receptor 123 [Source:HGNC Symbol;Acc:13838]	ENSMMUG00000006087	GPR123	adhesion G protein-coupled receptor A1 [Source:HGNC Symbol;Acc:HGNC:13838]	Diploid	Diploid
ENSG00000170113	NIPA1	non imprinted in Prader-Willi/Angelman syndrome 1 [Source:HGNC Symbol;Acc:17043]	ENSMMUG00000003013	NIPA1	non imprinted in Prader-Willi/Angelman syndrome 1 [Source:HGNC Symbol;Acc:HGNC:17043]	Diploid	Diploid
ENSG00000115266	APC2	adenomatosis polyposis coli 2 [Source:HGNC Symbol;Acc:24036]	ENSMMUG00000003053	APC2	APC2, WNT signaling pathway regulator [Source:HGNC Symbol;Acc:HGNC:24036]	Diploid	Diploid
ENSG00000181513	ACBD4	acyl-CoA binding domain containing 4 [Source:HGNC Symbol;Acc:23337]	ENSMMUG00000013589	ACBD4	acyl-CoA binding domain containing 4 [Source:HGNC Symbol;Acc:HGNC:23337]	Diploid	Diploid
ENSG00000182162	P2RY8	purinergic receptor P2Y, G-protein coupled, 8 [Source:HGNC Symbol;Acc:15524]	ENSMMUG00000041242	P2RY8	P2Y receptor family member 8 [Source:HGNC Symbol;Acc:HGNC:15524]	Diploid	Diploid
ENSG00000198523	PLN	phospholamban [Source:HGNC Symbol;Acc:9080]	ENSMMUG00000045439	PLN	phospholamban [Source:HGNC Symbol;Acc:HGNC:9080]	Diploid	Diploid
ENSG00000153933	DGKE	diacylglycerol kinase, epsilon 64kDa [Source:HGNC Symbol;Acc:2852]	ENSMMUG00000005789	DGKE	diacylglycerol kinase epsilon [Source:HGNC Symbol;Acc:HGNC:2852]	Diploid	Diploid
ENSG00000014641	MDH1	malate dehydrogenase 1, NAD (soluble) [Source:HGNC Symbol;Acc:6970]	ENSMMUG00000006163	MDH1	malate dehydrogenase 1 [Source:HGNC Symbol;Acc:HGNC:6970]	Diploid	Diploid
ENSG00000164751	PEX2	peroxisomal biogenesis factor 2 [Source:HGNC Symbol;Acc:9717]	ENSMMUG00000044796	PEX2	peroxisomal biogenesis factor 2 [Source:HGNC Symbol;Acc:HGNC:9717]	Diploid	Diploid
ENSG00000175938	ORAI3	ORAI calcium release-activated calcium modulator 3 [Source:HGNC Symbol;Acc:28185]	ENSMMUG00000003232	ORAI3	ORAI calcium release-activated calcium modulator 3 [Source:HGNC Symbol;Acc:HGNC:28185]	Diploid	Diploid
ENSG00000104081	BMF	Bcl2 modifying factor [Source:HGNC Symbol;Acc:24132]	ENSMMUG00000014372	BMF	Bcl2 modifying factor [Source:HGNC Symbol;Acc:HGNC:24132]	Diploid	Diploid
ENSG00000148218	ALAD	aminolevulinate dehydratase [Source:HGNC Symbol;Acc:395]	ENSMMUG00000031965	ALAD	aminolevulinate dehydratase [Source:HGNC Symbol;Acc:HGNC:395]	Diploid	Diploid
ENSG00000113520	IL4	interleukin 4 [Source:HGNC Symbol;Acc:6014]	ENSMMUG00000003133	IL4	interleukin 4 [Source:HGNC Symbol;Acc:HGNC:6014]	Diploid	Diploid
ENSG00000130584	ZBTB46	zinc finger and BTB domain containing 46 [Source:HGNC Symbol;Acc:16094]	ENSMMUG00000020712	ZBTB46	zinc finger and BTB domain containing 46 [Source:HGNC Symbol;Acc:HGNC:16094]	Diploid	Diploid
ENSG00000169302	STK32A	serine/threonine kinase 32A [Source:HGNC Symbol;Acc:28317]	ENSMMUG00000019290	STK32A	serine/threonine kinase 32A [Source:HGNC Symbol;Acc:HGNC:28317]	Diploid	Diploid
ENSG00000147394	ZNF185	zinc finger protein 185 (LIM domain) [Source:HGNC Symbol;Acc:12976]	ENSMMUG00000015264	ZNF185	zinc finger protein 185 with LIM domain [Source:HGNC Symbol;Acc:HGNC:12976]	Diploid	Diploid
ENSG00000182450	KCNK4	potassium channel, subfamily K, member 4 [Source:HGNC Symbol;Acc:6279]	ENSMMUG00000017802	KCNK4	potassium two pore domain channel subfamily K member 4 [Source:HGNC Symbol;Acc:HGNC:6279]	Diploid	Diploid
ENSG00000243509	TNFRSF6B	tumor necrosis factor receptor superfamily, member 6b, decoy [Source:HGNC Symbol;Acc:11921]	ENSMMUG00000045470	TNFRSF6B	TNF receptor superfamily member 6b [Source:HGNC Symbol;Acc:HGNC:11921]	Diploid	Diploid
ENSG00000148908	RGS10	regulator of G-protein signaling 10 [Source:HGNC Symbol;Acc:9992]	ENSMMUG00000021610	RGS10	regulator of G protein signaling 10 [Source:HGNC Symbol;Acc:HGNC:9992]	Diploid	Diploid
ENSG00000091409	ITGA6	integrin, alpha 6 [Source:HGNC Symbol;Acc:6142]	ENSMMUG00000002370	ITGA6	integrin subunit alpha 6 [Source:HGNC Symbol;Acc:HGNC:6142]	Diploid	Diploid
ENSG00000173039	RELA	v-rel avian reticuloendotheliosis viral oncogene homolog A [Source:HGNC Symbol;Acc:9955]	ENSMMUG00000007418	RELA	RELA proto-oncogene, NF-kB subunit [Source:HGNC Symbol;Acc:HGNC:9955]	Diploid	Diploid
ENSG00000079482	OPHN1	oligophrenin 1 [Source:HGNC Symbol;Acc:8148]	ENSMMUG00000018366	OPHN1	oligophrenin 1 [Source:HGNC Symbol;Acc:HGNC:8148]	Diploid	Diploid
ENSG00000138411	HECW2	HECT, C2 and WW domain containing E3 ubiquitin protein ligase 2 [Source:HGNC Symbol;Acc:29853]	ENSMMUG00000005627	HECW2	HECT, C2 and WW domain containing E3 ubiquitin protein ligase 2 [Source:HGNC Symbol;Acc:HGNC:29853]	Diploid	Diploid
ENSG00000187860	CCDC157	coiled-coil domain containing 157 [Source:HGNC Symbol;Acc:33854]	ENSMMUG00000017089	CCDC157	coiled-coil domain containing 157 [Source:HGNC Symbol;Acc:HGNC:33854]	Diploid	Diploid
ENSG00000111859	NEDD9	neural precursor cell expressed, developmentally down-regulated 9 [Source:HGNC Symbol;Acc:7733]	ENSMMUG00000016135	NEDD9	neural precursor cell expressed, developmentally down-regulated 9 [Source:HGNC Symbol;Acc:HGNC:7733]	Diploid	Diploid
ENSG00000125144	MT1G	metallothionein 1G [Source:HGNC Symbol;Acc:7399]	ENSMMUG00000046289			Duplicated and fixed as a whole	Duplicated and fixed as a whole
ENSG00000138074	SLC5A6	solute carrier family 5 (sodium/multivitamin and iodide cotransporter), member 6 [Source:HGNC Symbol;Acc:11041]	ENSMMUG00000010257	SLC5A6	solute carrier family 5 member 6 [Source:HGNC Symbol;Acc:HGNC:11041]	Diploid	Diploid
ENSG00000125246	CLYBL	citrate lyase beta like [Source:HGNC Symbol;Acc:18355]	ENSMMUG00000003558	CLYBL	citrate lyase beta like [Source:HGNC Symbol;Acc:HGNC:18355]	Diploid	Diploid
ENSG00000165288	BRWD3	bromodomain and WD repeat domain containing 3 [Source:HGNC Symbol;Acc:17342]	ENSMMUG00000010763	BRWD3	bromodomain and WD repeat domain containing 3 [Source:HGNC Symbol;Acc:HGNC:17342]	Diploid	Diploid
ENSG00000198792	TMEM184B	transmembrane protein 184B [Source:HGNC Symbol;Acc:1310]	ENSMMUG00000019390	TMEM184B	transmembrane protein 184B [Source:HGNC Symbol;Acc:HGNC:1310]	Diploid	Diploid
ENSG00000120903	CHRNA2	cholinergic receptor, nicotinic, alpha 2 (neuronal) [Source:HGNC Symbol;Acc:1956]	ENSMMUG00000021514	CHRNA2	cholinergic receptor nicotinic alpha 2 subunit [Source:HGNC Symbol;Acc:HGNC:1956]	Diploid	Diploid
ENSG00000112212	TSPO2	translocator protein 2 [Source:HGNC Symbol;Acc:21256]	ENSMMUG00000021169	TSPO2	translocator protein 2 [Source:HGNC Symbol;Acc:HGNC:21256]	Diploid	Diploid
ENSG00000130881	LRP3	low density lipoprotein receptor-related protein 3 [Source:HGNC Symbol;Acc:6695]	ENSMMUG00000022872	LRP3	LDL receptor related protein 3 [Source:HGNC Symbol;Acc:HGNC:6695]	Diploid	Diploid
ENSG00000175550	DRAP1	DR1-associated protein 1 (negative cofactor 2 alpha) [Source:HGNC Symbol;Acc:3019]	ENSMMUG00000008655	DRAP1	DR1 associated protein 1 [Source:HGNC Symbol;Acc:HGNC:3019]	Diploid	Diploid
ENSG00000105204	DYRK1B	dual-specificity tyrosine-(Y)-phosphorylation regulated kinase 1B [Source:HGNC Symbol;Acc:3092]	ENSMMUG00000022726	DYRK1B	dual specificity tyrosine phosphorylation regulated kinase 1B [Source:HGNC Symbol;Acc:HGNC:3092]	Diploid	Diploid
ENSG00000001167	NFYA	nuclear transcription factor Y, alpha [Source:HGNC Symbol;Acc:7804]	ENSMMUG00000021173	NFYA	nuclear transcription factor Y subunit alpha [Source:HGNC Symbol;Acc:HGNC:7804]	Diploid	Diploid
ENSG00000099995	SF3A1	splicing factor 3a, subunit 1, 120kDa [Source:HGNC Symbol;Acc:10765]	ENSMMUG00000005547	SF3A1	splicing factor 3a subunit 1 [Source:HGNC Symbol;Acc:HGNC:10765]	Diploid	Diploid
ENSG00000130876	SLC7A10	solute carrier family 7 (neutral amino acid transporter light chain, asc system), member 10 [Source:HGNC Symbol;Acc:11058]	ENSMMUG00000022875	SLC7A10	solute carrier family 7 member 10 [Source:HGNC Symbol;Acc:HGNC:11058]	Diploid	Diploid
ENSG00000147654	EBAG9	estrogen receptor binding site associated, antigen, 9 [Source:HGNC Symbol;Acc:3123]	ENSMMUG00000016186	EBAG9	estrogen receptor binding site associated, antigen, 9 [Source:HGNC Symbol;Acc:HGNC:3123]	Diploid	Diploid
ENSG00000179115	FARSA	phenylalanyl-tRNA synthetase, alpha subunit [Source:HGNC Symbol;Acc:3592]	ENSMMUG00000004390	FARSA	phenylalanyl-tRNA synthetase alpha subunit [Source:HGNC Symbol;Acc:HGNC:3592]	Diploid	Diploid
ENSG00000117148	ACTL8	actin-like 8 [Source:HGNC Symbol;Acc:24018]	ENSMMUG00000010852	ACTL8	actin like 8 [Source:HGNC Symbol;Acc:HGNC:24018]	Diploid	Diploid
ENSG00000117154	IGSF21	immunoglobin superfamily, member 21 [Source:HGNC Symbol;Acc:28246]	ENSMMUG00000023517	IGSF21	immunoglobin superfamily member 21 [Source:HGNC Symbol;Acc:HGNC:28246]	Diploid	Diploid
ENSG00000129235	TXNDC17	thioredoxin domain containing 17 [Source:HGNC Symbol;Acc:28218]	ENSMMUG00000048886	TXNDC17	thioredoxin domain containing 17 [Source:HGNC Symbol;Acc:HGNC:28218]	Diploid	Diploid
ENSG00000198932	GPRASP1	G protein-coupled receptor associated sorting protein 1 [Source:HGNC Symbol;Acc:24834]	ENSMMUG00000046251	GPRASP1	G protein-coupled receptor associated sorting protein 1 [Source:HGNC Symbol;Acc:HGNC:24834]	Diploid	Diploid
ENSG00000122678	POLM	polymerase (DNA directed), mu [Source:HGNC Symbol;Acc:9185]	ENSMMUG00000002421	POLM	DNA polymerase mu [Source:HGNC Symbol;Acc:HGNC:9185]	Diploid	Diploid
ENSG00000158301	GPRASP2	G protein-coupled receptor associated sorting protein 2 [Source:HGNC Symbol;Acc:25169]	ENSMMUG00000009970	GPRASP2	G protein-coupled receptor associated sorting protein 2 [Source:HGNC Symbol;Acc:HGNC:25169]	Diploid	Diploid
ENSG00000130733	YIPF2	Yip1 domain family, member 2 [Source:HGNC Symbol;Acc:28476]	ENSMMUG00000004400			Diploid	Diploid
ENSG00000180090	OR3A1	olfactory receptor, family 3, subfamily A, member 1 [Source:HGNC Symbol;Acc:8282]	ENSMMUG00000022684	OR3A1	olfactory receptor family 3 subfamily A member 1 [Source:HGNC Symbol;Acc:HGNC:8282]	Diploid	Diploid
ENSG00000134470	IL15RA	interleukin 15 receptor, alpha [Source:HGNC Symbol;Acc:5978]	ENSMMUG00000015149	IL15Ra	interleukin-15 receptor subunit alpha isoform 1 precursor [Source:RefSeq peptide;Acc:NP_001166315]	Diploid	Diploid
ENSG00000179855	GIPC3	GIPC PDZ domain containing family, member 3 [Source:HGNC Symbol;Acc:18183]	ENSMMUG00000011402	GIPC3	GIPC PDZ domain containing family member 3 [Source:HGNC Symbol;Acc:HGNC:18183]	Diploid	Diploid
ENSG00000125962	ARMCX5	armadillo repeat containing, X-linked 5 [Source:HGNC Symbol;Acc:25772]	ENSMMUG00000005291	ARMCX5	armadillo repeat containing, X-linked 5 [Source:HGNC Symbol;Acc:HGNC:25772]	Diploid	Diploid
ENSG00000197976	AKAP17A	A kinase (PRKA) anchor protein 17A [Source:HGNC Symbol;Acc:18783]	ENSMMUG00000000885	AKAP17A	A-kinase anchoring protein 17A [Source:HGNC Symbol;Acc:HGNC:18783]	Diploid	Diploid
ENSG00000198920	KIAA0753	KIAA0753 [Source:HGNC Symbol;Acc:29110]	ENSMMUG00000003784	KIAA0753	KIAA0753 [Source:HGNC Symbol;Acc:HGNC:29110]	Diploid	Diploid
ENSG00000183723	CMTM4	CKLF-like MARVEL transmembrane domain containing 4 [Source:HGNC Symbol;Acc:19175]	ENSMMUG00000020848	CMTM4	CKLF like MARVEL transmembrane domain containing 4 [Source:HGNC Symbol;Acc:HGNC:19175]	Diploid	Diploid
ENSG00000082258	CCNT2	cyclin T2 [Source:HGNC Symbol;Acc:1600]	ENSMMUG00000010196	CCNT2	cyclin T2 [Source:HGNC Symbol;Acc:HGNC:1600]	Diploid	Diploid
ENSG00000107560	RAB11FIP2	RAB11 family interacting protein 2 (class I) [Source:HGNC Symbol;Acc:29152]	ENSMMUG00000021805	RAB11FIP2	RAB11 family interacting protein 2 [Source:HGNC Symbol;Acc:HGNC:29152]	Diploid	Diploid
ENSG00000079215	SLC1A3	solute carrier family 1 (glial high affinity glutamate transporter), member 3 [Source:HGNC Symbol;Acc:10941]	ENSMMUG00000006202	SLC1A3	solute carrier family 1 member 3 [Source:HGNC Symbol;Acc:HGNC:10941]	Diploid	Diploid
ENSG00000125319	C17orf53	chromosome 17 open reading frame 53 [Source:HGNC Symbol;Acc:28460]	ENSMMUG00000006808	C17orf53	chromosome 17 open reading frame 53 [Source:HGNC Symbol;Acc:HGNC:28460]	Diploid	Diploid
ENSG00000171316	CHD7	chromodomain helicase DNA binding protein 7 [Source:HGNC Symbol;Acc:20626]	ENSMMUG00000011584	CHD7	chromodomain helicase DNA binding protein 7 [Source:HGNC Symbol;Acc:HGNC:20626]	Diploid	Diploid
ENSG00000180638	SLC47A2	solute carrier family 47 (multidrug and toxin extrusion), member 2 [Source:HGNC Symbol;Acc:26439]	ENSMMUG00000014134	SLC47A2	solute carrier family 47 member 2 [Source:HGNC Symbol;Acc:HGNC:26439]	Diploid	Diploid
ENSG00000185115	NDNL2	necdin-like 2 [Source:HGNC Symbol;Acc:7677]	ENSMMUG00000042025			Diploid	Diploid
ENSG00000142453	CARM1	coactivator-associated arginine methyltransferase 1 [Source:HGNC Symbol;Acc:23393]	ENSMMUG00000004401	CARM1	coactivator associated arginine methyltransferase 1 [Source:HGNC Symbol;Acc:HGNC:23393]	Diploid	Diploid
ENSG00000104059	FAM189A1	family with sequence similarity 189, member A1 [Source:HGNC Symbol;Acc:29075]	ENSMMUG00000019340	FAM189A1	family with sequence similarity 189 member A1 [Source:HGNC Symbol;Acc:HGNC:29075]	Diploid	Diploid
ENSG00000009709	PAX7	paired box 7 [Source:HGNC Symbol;Acc:8621]	ENSMMUG00000017444	PAX7	paired box 7 [Source:HGNC Symbol;Acc:HGNC:8621]	Diploid	Diploid
ENSG00000163576	EFHB	EF-hand domain family, member B [Source:HGNC Symbol;Acc:26330]	ENSMMUG00000018836	EFHB	EF-hand domain family member B [Source:HGNC Symbol;Acc:HGNC:26330]	Diploid	Diploid
ENSG00000125485	DDX31	DEAD (Asp-Glu-Ala-Asp) box polypeptide 31 [Source:HGNC Symbol;Acc:16715]	ENSMMUG00000004590	DDX31	DEAD-box helicase 31 [Source:HGNC Symbol;Acc:HGNC:16715]	Diploid	Diploid
ENSG00000109103	UNC119	unc-119 homolog (C. elegans) [Source:HGNC Symbol;Acc:12565]	ENSMMUG00000012239	UNC119	unc-119 lipid binding chaperone [Source:HGNC Symbol;Acc:HGNC:12565]	Diploid	Diploid
ENSG00000170748	RBMXL2	RNA binding motif protein, X-linked-like 2 [Source:HGNC Symbol;Acc:17886]	ENSMMUG00000008588	RBMXL2	RNA binding motif protein, X-linked like 2 [Source:HGNC Symbol;Acc:HGNC:17886]	Diploid	Diploid
ENSG00000177791	MYOZ1	myozenin 1 [Source:HGNC Symbol;Acc:13752]	ENSMMUG00000013696	MYOZ1	myozenin 1 [Source:HGNC Symbol;Acc:HGNC:13752]	Diploid	Diploid
ENSG00000130449	ZSWIM6	zinc finger, SWIM-type containing 6 [Source:HGNC Symbol;Acc:29316]	ENSMMUG00000002532	ZSWIM6	zinc finger SWIM-type containing 6 [Source:HGNC Symbol;Acc:HGNC:29316]	Diploid	Diploid
ENSG00000186417	GLDN	gliomedin [Source:HGNC Symbol;Acc:29514]	ENSMMUG00000005976	GLDN	gliomedin [Source:HGNC Symbol;Acc:HGNC:29514]	Diploid	Diploid
ENSG00000129292	PHF20L1	PHD finger protein 20-like 1 [Source:HGNC Symbol;Acc:24280]	ENSMMUG00000010190	PHF20L1	PHD finger protein 20-like 1 [Source:HGNC Symbol;Acc:HGNC:24280]	Diploid	Diploid
ENSG00000145781	COMMD10	COMM domain containing 10 [Source:HGNC Symbol;Acc:30201]	ENSMMUG00000008738	COMMD10	COMM domain containing 10 [Source:HGNC Symbol;Acc:HGNC:30201]	Diploid	Diploid
ENSG00000113657	DPYSL3	dihydropyrimidinase-like 3 [Source:HGNC Symbol;Acc:3015]	ENSMMUG00000019291	DPYSL3	dihydropyrimidinase like 3 [Source:HGNC Symbol;Acc:HGNC:3015]	Diploid	Diploid
ENSG00000125520	SLC2A4RG	SLC2A4 regulator [Source:HGNC Symbol;Acc:15930]	ENSMMUG00000020711	SLC2A4RG	SLC2A4 regulator [Source:HGNC Symbol;Acc:HGNC:15930]	Diploid	Diploid
ENSG00000158604	TMED4	transmembrane emp24 protein transport domain containing 4 [Source:HGNC Symbol;Acc:22301]	ENSMMUG00000002650	TMED4	transmembrane p24 trafficking protein 4 [Source:HGNC Symbol;Acc:HGNC:22301]	Diploid	Diploid
ENSG00000156136	DCK	deoxycytidine kinase [Source:HGNC Symbol;Acc:2704]	ENSMMUG00000030280	DCK	deoxycytidine kinase [Source:HGNC Symbol;Acc:HGNC:2704]	Diploid	Diploid
ENSG00000109107	ALDOC	aldolase C, fructose-bisphosphate [Source:HGNC Symbol;Acc:418]	ENSMMUG00000020322	ALDOC	aldolase, fructose-bisphosphate C [Source:HGNC Symbol;Acc:HGNC:418]	Diploid	Diploid
ENSG00000110619	CARS	cysteinyl-tRNA synthetase [Source:HGNC Symbol;Acc:1493]	ENSMMUG00000000511	CARS	cysteinyl-tRNA synthetase [Source:HGNC Symbol;Acc:HGNC:1493]	Diploid	Diploid
ENSG00000114374	USP9Y	ubiquitin specific peptidase 9, Y-linked [Source:HGNC Symbol;Acc:12633]	ENSMMUG00000045991	USP9Y	ubiquitin specific peptidase 9, Y-linked [Source:HGNC Symbol;Acc:HGNC:12633]	Diploid	Diploid
ENSG00000137824	RMDN3	regulator of microtubule dynamics 3 [Source:HGNC Symbol;Acc:25550]	ENSMMUG00000000306	RMDN3	regulator of microtubule dynamics protein 3 [Source:RefSeq peptide;Acc:NP_001248689]	Diploid	Diploid
ENSG00000125484	GTF3C4	general transcription factor IIIC, polypeptide 4, 90kDa [Source:HGNC Symbol;Acc:4667]	ENSMMUG00000009915	GTF3C4	general transcription factor IIIC subunit 4 [Source:HGNC Symbol;Acc:HGNC:4667]	Diploid	Diploid
ENSG00000077514	POLD3	polymerase (DNA-directed), delta 3, accessory subunit [Source:HGNC Symbol;Acc:20932]	ENSMMUG00000020643	POLD3	DNA polymerase delta 3, accessory subunit [Source:HGNC Symbol;Acc:HGNC:20932]	Diploid	Diploid
ENSG00000196433	ASMT	acetylserotonin O-methyltransferase [Source:HGNC Symbol;Acc:750]	ENSMMUG00000032601			Diploid	Diploid
ENSG00000176024	ZNF613	zinc finger protein 613 [Source:HGNC Symbol;Acc:25827]	ENSMMUG00000023136	ZNF613	zinc finger protein 613 [Source:HGNC Symbol;Acc:HGNC:25827]	Diploid	Diploid
ENSG00000136819	C9orf78	chromosome 9 open reading frame 78 [Source:HGNC Symbol;Acc:24932]	ENSMMUG00000003795	C9orf78	chromosome 9 open reading frame 78 [Source:HGNC Symbol;Acc:HGNC:24932]	Diploid	Diploid
ENSG00000215301	DDX3X	DEAD (Asp-Glu-Ala-Asp) box helicase 3, X-linked [Source:HGNC Symbol;Acc:2745]	ENSMMUG00000017569	DDX3X	DEAD-box helicase 3, X-linked [Source:HGNC Symbol;Acc:HGNC:2745]	Diploid	Diploid
ENSG00000011600	TYROBP	TYRO protein tyrosine kinase binding protein [Source:HGNC Symbol;Acc:12449]	ENSMMUG00000008004	TYROBP	TYRO protein tyrosine kinase-binding protein [Source:UniProtKB/Swiss-Prot;Acc:Q8WNQ8]	Diploid	Diploid
ENSG00000136694	IL36A	interleukin 36, alpha [Source:HGNC Symbol;Acc:15562]	ENSMMUG00000000988	IL36A	interleukin 36 alpha [Source:HGNC Symbol;Acc:HGNC:15562]	Diploid	Diploid
ENSG00000183801	OLFML1	olfactomedin-like 1 [Source:HGNC Symbol;Acc:24473]	ENSMMUG00000038771	OLFML1	olfactomedin like 1 [Source:HGNC Symbol;Acc:HGNC:24473]	Diploid	Diploid
ENSG00000243927	MRPS6	mitochondrial ribosomal protein S6 [Source:HGNC Symbol;Acc:14051]	ENSMMUG00000023156	MRPS6	mitochondrial ribosomal protein S6 [Source:HGNC Symbol;Acc:HGNC:14051]	Diploid	Diploid
ENSG00000008394	MGST1	microsomal glutathione S-transferase 1 [Source:HGNC Symbol;Acc:7061]	ENSMMUG00000002359	MGST1	microsomal glutathione S-transferase 1 [Source:HGNC Symbol;Acc:HGNC:7061]	Diploid	Diploid
ENSG00000136696	IL36B	interleukin 36, beta [Source:HGNC Symbol;Acc:15564]	ENSMMUG00000000986	IL36B	interleukin 36 beta [Source:HGNC Symbol;Acc:HGNC:15564]	Diploid	Diploid
ENSG00000170743	SYT9	synaptotagmin IX [Source:HGNC Symbol;Acc:19265]	ENSMMUG00000004267	SYT9	synaptotagmin 9 [Source:HGNC Symbol;Acc:HGNC:19265]	Diploid	Diploid
ENSG00000198743	SLC5A3	solute carrier family 5 (sodium/myo-inositol cotransporter), member 3 [Source:HGNC Symbol;Acc:11038]	ENSMMUG00000030470	SLC5A3	solute carrier family 5 member 3 [Source:HGNC Symbol;Acc:HGNC:11038]	Diploid	Diploid
ENSG00000136878	USP20	ubiquitin specific peptidase 20 [Source:HGNC Symbol;Acc:12619]	ENSMMUG00000003797	USP20	ubiquitin specific peptidase 20 [Source:HGNC Symbol;Acc:HGNC:12619]	Diploid	Diploid
ENSG00000156398	SFXN2	sideroflexin 2 [Source:HGNC Symbol;Acc:16086]	ENSMMUG00000047714			Diploid	Diploid
ENSG00000029153	ARNTL2	aryl hydrocarbon receptor nuclear translocator-like 2 [Source:HGNC Symbol;Acc:18984]	ENSMMUG00000023249	ARNTL2	aryl hydrocarbon receptor nuclear translocator like 2 [Source:HGNC Symbol;Acc:HGNC:18984]	Diploid	Diploid
ENSG00000107968	MAP3K8	mitogen-activated protein kinase kinase kinase 8 [Source:HGNC Symbol;Acc:6860]	ENSMMUG00000004930	MAP3K8	mitogen-activated protein kinase kinase kinase 8 [Source:HGNC Symbol;Acc:HGNC:6860]	Diploid	Diploid
ENSG00000151923	TIAL1	TIA1 cytotoxic granule-associated RNA binding protein-like 1 [Source:HGNC Symbol;Acc:11804]	ENSMMUG00000001472	TIAL1	TIA1 cytotoxic granule-associated RNA binding protein-like 1 [Source:HGNC Symbol;Acc:HGNC:11804]	Diploid	Diploid
ENSG00000048540	LMO3	LIM domain only 3 (rhombotin-like 2) [Source:HGNC Symbol;Acc:6643]	ENSMMUG00000040307	LMO3	LIM domain only protein 3 [Source:RefSeq peptide;Acc:NP_001253235]	Diploid	Diploid
ENSG00000164830	OXR1	oxidation resistance 1 [Source:HGNC Symbol;Acc:15822]	ENSMMUG00000017845	OXR1	oxidation resistance 1 [Source:HGNC Symbol;Acc:HGNC:15822]	Diploid	Diploid
ENSG00000176896	TCEANC	transcription elongation factor A (SII) N-terminal and central domain containing [Source:HGNC Symbol;Acc:28277]	ENSMMUG00000022616	TCEANC	transcription elongation factor A N-terminal and central domain containing [Source:HGNC Symbol;Acc:HGNC:28277]	Diploid	Diploid
ENSG00000134363	FST	follistatin [Source:HGNC Symbol;Acc:3971]	ENSMMUG00000004860	FST	follistatin [Source:HGNC Symbol;Acc:HGNC:3971]	Diploid	Diploid
ENSG00000148229	POLE3	polymerase (DNA directed), epsilon 3, accessory subunit [Source:HGNC Symbol;Acc:13546]	ENSMMUG00000044537	POLE3	DNA polymerase epsilon 3, accessory subunit [Source:HGNC Symbol;Acc:HGNC:13546]	Diploid	Diploid
ENSG00000187808	SOWAHD	sosondowah ankyrin repeat domain family member D [Source:HGNC Symbol;Acc:32960]	ENSMMUG00000010476	SOWAHD	sosondowah ankyrin repeat domain family member D [Source:HGNC Symbol;Acc:HGNC:32960]	Diploid	Diploid
ENSG00000179218	CALR	calreticulin [Source:HGNC Symbol;Acc:1455]	ENSMMUG00000004392	CALR	calreticulin precursor [Source:RefSeq peptide;Acc:NP_001248060]	Diploid	Diploid
ENSG00000245848	CEBPA	CCAAT/enhancer binding protein (C/EBP), alpha [Source:HGNC Symbol;Acc:1833]	ENSMMUG00000006124	CEBPA	CCAAT/enhancer binding protein alpha [Source:HGNC Symbol;Acc:HGNC:1833]	Diploid	Diploid
ENSG00000171307	ZDHHC16	zinc finger, DHHC-type containing 16 [Source:HGNC Symbol;Acc:20714]	ENSMMUG00000020029	ZDHHC16	zinc finger DHHC-type containing 16 [Source:HGNC Symbol;Acc:HGNC:20714]	Diploid	Diploid
ENSG00000137225	CAPN11	calpain 11 [Source:HGNC Symbol;Acc:1478]	ENSMMUG00000012876	CAPN11	calpain 11 [Source:HGNC Symbol;Acc:HGNC:1478]	Diploid	Diploid
ENSG00000187566	NHLRC1	NHL repeat containing E3 ubiquitin protein ligase 1 [Source:HGNC Symbol;Acc:21576]	ENSMMUG00000016626	NHLRC1	NHL repeat containing E3 ubiquitin protein ligase 1 [Source:HGNC Symbol;Acc:HGNC:21576]	Diploid	Diploid
ENSG00000151693	ASAP2	ArfGAP with SH3 domain, ankyrin repeat and PH domain 2 [Source:HGNC Symbol;Acc:2721]	ENSMMUG00000018033	ASAP2	ArfGAP with SH3 domain, ankyrin repeat and PH domain 2 [Source:HGNC Symbol;Acc:HGNC:2721]	Diploid	Diploid
ENSG00000135338	LCA5	Leber congenital amaurosis 5 [Source:HGNC Symbol;Acc:31923]	ENSMMUG00000004356	LCA5	LCA5, lebercilin [Source:HGNC Symbol;Acc:HGNC:31923]	Diploid	Diploid
ENSG00000162949	CAPN13	calpain 13 [Source:HGNC Symbol;Acc:16663]	ENSMMUG00000003473	CAPN13	calpain 13 [Source:HGNC Symbol;Acc:HGNC:16663]	Diploid	Diploid
ENSG00000175985	PLEKHD1	pleckstrin homology domain containing, family D (with coiled-coil domains) member 1 [Source:HGNC Symbol;Acc:20148]	ENSMMUG00000003240	PLEKHD1	pleckstrin homology and coiled-coil domain containing D1 [Source:HGNC Symbol;Acc:HGNC:20148]	Diploid	Diploid
ENSG00000155087	ODF1	outer dense fiber of sperm tails 1 [Source:HGNC Symbol;Acc:8113]	ENSMMUG00000002108	ODF1	outer dense fiber of sperm tails 1 [Source:HGNC Symbol;Acc:HGNC:8113]	Diploid	Diploid
ENSG00000165792	METTL17	methyltransferase like 17 [Source:HGNC Symbol;Acc:19280]	ENSMMUG00000003157	METTL17	methyltransferase like 17 [Source:HGNC Symbol;Acc:HGNC:19280]	Diploid	Diploid
ENSG00000183579	ZNRF3	zinc and ring finger 3 [Source:HGNC Symbol;Acc:18126]	ENSMMUG00000000025	ZNRF3	zinc and ring finger 3 [Source:HGNC Symbol;Acc:HGNC:18126]	Diploid	Diploid
ENSG00000165186	PTCHD1	patched domain containing 1 [Source:HGNC Symbol;Acc:26392]	ENSMMUG00000001088	PTCHD1	patched domain containing 1 [Source:HGNC Symbol;Acc:HGNC:26392]	Diploid	Diploid
ENSG00000105672	ETV2	ets variant 2 [Source:HGNC Symbol;Acc:3491]	ENSMMUG00000018953	ETV2	ETS variant 2 [Source:HGNC Symbol;Acc:HGNC:3491]	Diploid	Diploid
ENSG00000071242	RPS6KA2	ribosomal protein S6 kinase, 90kDa, polypeptide 2 [Source:HGNC Symbol;Acc:10431]	ENSMMUG00000005670	RPS6KA2	ribosomal protein S6 kinase A2 [Source:HGNC Symbol;Acc:HGNC:10431]	Diploid	Diploid
ENSG00000180879	SSR4	signal sequence receptor, delta [Source:HGNC Symbol;Acc:11326]	ENSMMUG00000003375	SSR4	signal sequence receptor subunit 4 [Source:HGNC Symbol;Acc:HGNC:11326]	Diploid	Diploid
ENSG00000162009	SSTR5	somatostatin receptor 5 [Source:HGNC Symbol;Acc:11334]	ENSMMUG00000002896	SSTR5	somatostatin receptor 5 [Source:HGNC Symbol;Acc:HGNC:11334]	Diploid	Diploid
ENSG00000146112	PPP1R18	protein phosphatase 1, regulatory subunit 18 [Source:HGNC Symbol;Acc:29413]	ENSMMUG00000019961	PPP1R18	phostensin [Source:RefSeq peptide;Acc:NP_001098634]	Diploid	Diploid
ENSG00000178821	TMEM52	transmembrane protein 52 [Source:HGNC Symbol;Acc:27916]	ENSMMUG00000012393	TMEM52	transmembrane protein 52 [Source:HGNC Symbol;Acc:HGNC:27916]	Diploid	Diploid
ENSG00000107798	LIPA	lipase A, lysosomal acid, cholesterol esterase [Source:HGNC Symbol;Acc:6617]	ENSMMUG00000047356	LIPA	lipase A, lysosomal acid type [Source:HGNC Symbol;Acc:HGNC:6617]	Diploid	Diploid
ENSG00000109101	FOXN1	forkhead box N1 [Source:HGNC Symbol;Acc:12765]	ENSMMUG00000021975	FOXN1	forkhead box N1 [Source:HGNC Symbol;Acc:HGNC:12765]	Diploid	Diploid
ENSG00000057657	PRDM1	PR domain containing 1, with ZNF domain [Source:HGNC Symbol;Acc:9346]	ENSMMUG00000021401	PRDM1	PR/SET domain 1 [Source:HGNC Symbol;Acc:HGNC:9346]	Diploid	Diploid
ENSG00000197879	MYO1C	myosin IC [Source:HGNC Symbol;Acc:7597]	ENSMMUG00000002371	MYO1C	myosin IC [Source:HGNC Symbol;Acc:HGNC:7597]	Diploid	Diploid
ENSG00000197798	FAM118B	family with sequence similarity 118, member B [Source:HGNC Symbol;Acc:26110]	ENSMMUG00000007935	FAM118B	family with sequence similarity 118, member B [Source:RefSeq peptide;Acc:NP_001247745]	Diploid	Diploid
ENSG00000007202	KIAA0100	KIAA0100 [Source:HGNC Symbol;Acc:28960]	ENSMMUG00000023412	KIAA0100	KIAA0100 [Source:HGNC Symbol;Acc:HGNC:28960]	Diploid	Diploid
ENSG00000115155	OTOF	otoferlin [Source:HGNC Symbol;Acc:8515]	ENSMMUG00000014292	OTOF	otoferlin [Source:HGNC Symbol;Acc:HGNC:8515]	Diploid	Diploid
ENSG00000164258	NDUFS4	NADH dehydrogenase (ubiquinone) Fe-S protein 4, 18kDa (NADH-coenzyme Q reductase) [Source:HGNC Symbol;Acc:7711]	ENSMMUG00000004861	NDUFS4	NADH:ubiquinone oxidoreductase subunit S4 [Source:HGNC Symbol;Acc:HGNC:7711]	Diploid	Diploid
ENSG00000156113	KCNMA1	potassium large conductance calcium-activated channel, subfamily M, alpha member 1 [Source:HGNC Symbol;Acc:6284]	ENSMMUG00000018390	KCNMA1	potassium calcium-activated channel subfamily M alpha 1 [Source:HGNC Symbol;Acc:HGNC:6284]	Diploid	Diploid
ENSG00000176160	HSF5	heat shock transcription factor family member 5 [Source:HGNC Symbol;Acc:26862]	ENSMMUG00000004184	HSF5	heat shock transcription factor 5 [Source:HGNC Symbol;Acc:HGNC:26862]	Diploid	Diploid
ENSG00000119185	ITGB1BP1	integrin beta 1 binding protein 1 [Source:HGNC Symbol;Acc:23927]	ENSMMUG00000018036	ITGB1BP1	integrin subunit beta 1 binding protein 1 [Source:HGNC Symbol;Acc:HGNC:23927]	Diploid	Diploid
ENSG00000067829	IDH3G	isocitrate dehydrogenase 3 (NAD+) gamma [Source:HGNC Symbol;Acc:5386]	ENSMMUG00000003374	IDH3G	isocitrate dehydrogenase 3 (NAD(+)) gamma [Source:HGNC Symbol;Acc:HGNC:5386]	Diploid	Diploid
ENSG00000198879	SFMBT2	Scm-like with four mbt domains 2 [Source:HGNC Symbol;Acc:20256]	ENSMMUG00000019194	SFMBT2	Scm like with four mbt domains 2 [Source:HGNC Symbol;Acc:HGNC:20256]	Diploid	Diploid
ENSG00000080572	PIH1D3	PIH1 domain containing 3 [Source:HGNC Symbol;Acc:28570]	ENSMMUG00000023174	PIH1D3	PIH1 domain containing 3 [Source:HGNC Symbol;Acc:HGNC:28570]	Diploid	Diploid
ENSG00000183153	GJD3	gap junction protein, delta 3, 31.9kDa [Source:HGNC Symbol;Acc:19147]	ENSMMUG00000012489	GJD3	gap junction protein delta 3 [Source:HGNC Symbol;Acc:HGNC:19147]	Diploid	Diploid
ENSG00000161996	WDR90	WD repeat domain 90 [Source:HGNC Symbol;Acc:26960]	ENSMMUG00000013169	WDR90	WD repeat domain 90 [Source:HGNC Symbol;Acc:HGNC:26960]	Diploid	Diploid
ENSG00000162062	C16orf59	chromosome 16 open reading frame 59 [Source:HGNC Symbol;Acc:25849]	ENSMMUG00000000002	TEDC2	tubulin epsilon and delta complex 2 [Source:HGNC Symbol;Acc:HGNC:25849]	Diploid	Diploid
ENSG00000169084	DHRSX	dehydrogenase/reductase (SDR family) X-linked [Source:HGNC Symbol;Acc:18399]	ENSMMUG00000011897			Diploid	Diploid
ENSG00000165526	RPUSD4	RNA pseudouridylate synthase domain containing 4 [Source:HGNC Symbol;Acc:25898]	ENSMMUG00000007933	RPUSD4	RNA pseudouridylate synthase domain containing 4 [Source:HGNC Symbol;Acc:HGNC:25898]	Diploid	Diploid
ENSG00000214717	ZBED1	zinc finger, BED-type containing 1 [Source:HGNC Symbol;Acc:447]	ENSMMUG00000007514	ZBED1	zinc finger BED-type containing 1 [Source:HGNC Symbol;Acc:HGNC:447]	Diploid	Diploid
ENSG00000179055	OR13D1	olfactory receptor, family 13, subfamily D, member 1 [Source:HGNC Symbol;Acc:14695]	ENSMMUG00000043899	OR13D1	olfactory receptor family 13 subfamily D member 1 [Source:HGNC Symbol;Acc:HGNC:14695]	Diploid	Diploid
ENSG00000131507	NDFIP1	Nedd4 family interacting protein 1 [Source:HGNC Symbol;Acc:17592]	ENSMMUG00000016787	NDFIP1	Nedd4 family interacting protein 1 [Source:HGNC Symbol;Acc:HGNC:17592]	Diploid	Diploid
ENSG00000182934	SRPR	signal recognition particle receptor (docking protein) [Source:HGNC Symbol;Acc:11307]	ENSMMUG00000007938	SRPR	SRP receptor alpha subunit [Source:HGNC Symbol;Acc:HGNC:11307]	Diploid	Diploid
ENSG00000267909	CCDC177	Homo sapiens coiled-coil domain containing 177 (CCDC177), mRNA. [Source:RefSeq mRNA;Acc:NM_001271507]	ENSMMUG00000012136	CCDC177	coiled-coil domain containing 177 [Source:HGNC Symbol;Acc:HGNC:23243]	Diploid	Diploid
ENSG00000007216	SLC13A2	solute carrier family 13 (sodium-dependent dicarboxylate transporter), member 2 [Source:HGNC Symbol;Acc:10917]	ENSMMUG00000037573	SLC13A2	solute carrier family 13 member 2 [Source:HGNC Symbol;Acc:HGNC:10917]	Diploid	Diploid
ENSG00000164053	ATRIP	ATR interacting protein [Source:HGNC Symbol;Acc:33499]	ENSMMUG00000010058	ATRIP	ATR interacting protein [Source:HGNC Symbol;Acc:HGNC:33499]	Diploid	Diploid
ENSG00000168676	KCTD19	potassium channel tetramerization domain containing 19 [Source:HGNC Symbol;Acc:24753]	ENSMMUG00000004971	KCTD19	potassium channel tetramerization domain containing 19 [Source:HGNC Symbol;Acc:HGNC:24753]	Diploid	Diploid
ENSG00000137726	FXYD6	FXYD domain containing ion transport regulator 6 [Source:HGNC Symbol;Acc:4030]	ENSMMUG00000047379			Diploid	Diploid
ENSG00000159423	ALDH4A1	aldehyde dehydrogenase 4 family, member A1 [Source:HGNC Symbol;Acc:406]	ENSMMUG00000004751	ALDH4A1	aldehyde dehydrogenase 4 family member A1 [Source:HGNC Symbol;Acc:HGNC:406]	Diploid	Diploid
ENSG00000105866	SP4	Sp4 transcription factor [Source:HGNC Symbol;Acc:11209]	ENSMMUG00000021684	SP4	Sp4 transcription factor [Source:HGNC Symbol;Acc:HGNC:11209]	Diploid	Diploid
ENSG00000140675	SLC5A2	solute carrier family 5 (sodium/glucose cotransporter), member 2 [Source:HGNC Symbol;Acc:11037]	ENSMMUG00000000897	SLC5A2	solute carrier family 5 member 2 [Source:HGNC Symbol;Acc:HGNC:11037]	Diploid	Diploid
ENSG00000110074	FOXRED1	FAD-dependent oxidoreductase domain containing 1 [Source:HGNC Symbol;Acc:26927]	ENSMMUG00000007944	FOXRED1	FAD dependent oxidoreductase domain containing 1 [Source:HGNC Symbol;Acc:HGNC:26927]	Diploid	Diploid
ENSG00000164338	UTP15	UTP15, U3 small nucleolar ribonucleoprotein, homolog (S. cerevisiae) [Source:HGNC Symbol;Acc:25758]	ENSMMUG00000023514	UTP15	UTP15, small subunit processome component [Source:HGNC Symbol;Acc:HGNC:25758]	Diploid	Diploid
ENSG00000095627	TDRD1	tudor domain containing 1 [Source:HGNC Symbol;Acc:11712]	ENSMMUG00000022517	TDRD1	tudor domain containing 1 [Source:HGNC Symbol;Acc:HGNC:11712]	Diploid	Diploid
ENSG00000150722	PPP1R1C	protein phosphatase 1, regulatory (inhibitor) subunit 1C [Source:HGNC Symbol;Acc:14940]	ENSMMUG00000001171	PPP1R1C	protein phosphatase 1 regulatory inhibitor subunit 1C [Source:HGNC Symbol;Acc:HGNC:14940]	Diploid	Diploid
ENSG00000178445	GLDC	glycine dehydrogenase (decarboxylating) [Source:HGNC Symbol;Acc:4313]	ENSMMUG00000031755	GLDC	glycine decarboxylase [Source:HGNC Symbol;Acc:HGNC:4313]	Diploid	Diploid
ENSG00000196155	PLEKHG4	pleckstrin homology domain containing, family G (with RhoGef domain) member 4 [Source:HGNC Symbol;Acc:24501]	ENSMMUG00000001514	PLEKHG4	pleckstrin homology and RhoGEF domain containing G4 [Source:HGNC Symbol;Acc:HGNC:24501]	Diploid	Diploid
ENSG00000126337	KRT36	keratin 36 [Source:HGNC Symbol;Acc:6454]	ENSMMUG00000018646	KRT36	keratin 36 [Source:HGNC Symbol;Acc:HGNC:6454]	Diploid	Diploid
ENSG00000177675	CD163L1	CD163 molecule-like 1 [Source:HGNC Symbol;Acc:30375]	ENSMMUG00000022109	CD163L1	CD163 molecule like 1 [Source:HGNC Symbol;Acc:HGNC:30375]	Diploid	Diploid
ENSG00000008277	ADAM22	ADAM metallopeptidase domain 22 [Source:HGNC Symbol;Acc:201]	ENSMMUG00000022695	ADAM22	ADAM metallopeptidase domain 22 [Source:HGNC Symbol;Acc:HGNC:201]	Diploid	Diploid
ENSG00000115705	TPO	thyroid peroxidase [Source:HGNC Symbol;Acc:12015]	ENSMMUG00000009662	TPO	thyroid peroxidase [Source:HGNC Symbol;Acc:HGNC:12015]	Diploid	Diploid
ENSG00000165238	WNK2	WNK lysine deficient protein kinase 2 [Source:HGNC Symbol;Acc:14542]	ENSMMUG00000013881	WNK2	WNK lysine deficient protein kinase 2 [Source:HGNC Symbol;Acc:HGNC:14542]	Diploid	Diploid
ENSG00000153208	MERTK	c-mer proto-oncogene tyrosine kinase [Source:HGNC Symbol;Acc:7027]	ENSMMUG00000010066	MERTK	MER proto-oncogene, tyrosine kinase [Source:HGNC Symbol;Acc:HGNC:7027]	Diploid	Diploid
ENSG00000183621	ZNF438	zinc finger protein 438 [Source:HGNC Symbol;Acc:21029]	ENSMMUG00000007864	ZNF438	zinc finger protein 438 [Source:HGNC Symbol;Acc:HGNC:21029]	Diploid	Diploid
ENSG00000123595	RAB9A	RAB9A, member RAS oncogene family [Source:HGNC Symbol;Acc:9792]	ENSMMUG00000022618	RAB9A	RAB9A, member RAS oncogene family [Source:HGNC Symbol;Acc:HGNC:9792]	Diploid	Diploid
ENSG00000130037	KCNA5	potassium voltage-gated channel, shaker-related subfamily, member 5 [Source:HGNC Symbol;Acc:6224]	ENSMMUG00000022887	KCNA5	potassium voltage-gated channel subfamily A member 5 [Source:HGNC Symbol;Acc:HGNC:6224]	Diploid	Diploid
ENSG00000108389	MTMR4	myotubularin related protein 4 [Source:HGNC Symbol;Acc:7452]	ENSMMUG00000046171	MTMR4	myotubularin related protein 4 [Source:HGNC Symbol;Acc:HGNC:7452]	Diploid	Diploid
ENSG00000125787	GNRH2	gonadotropin-releasing hormone 2 [Source:HGNC Symbol;Acc:4420]	ENSMMUG00000005890	GNRH2	progonadoliberin-2 precursor [Source:RefSeq peptide;Acc:NP_001029374]	Diploid	Diploid
ENSG00000124782	RREB1	ras responsive element binding protein 1 [Source:HGNC Symbol;Acc:10449]	ENSMMUG00000007852	RREB1	ras responsive element binding protein 1 [Source:HGNC Symbol;Acc:HGNC:10449]	Diploid	Diploid
ENSG00000177575	CD163	CD163 molecule [Source:HGNC Symbol;Acc:1631]	ENSMMUG00000005150	CD163	CD163 molecule [Source:HGNC Symbol;Acc:HGNC:1631]	Diploid	Diploid
ENSG00000164331	ANKRA2	ankyrin repeat, family A (RFXANK-like), 2 [Source:HGNC Symbol;Acc:13208]	ENSMMUG00000023513	ANKRA2	ankyrin repeat family A member 2 [Source:HGNC Symbol;Acc:HGNC:13208]	Diploid	Diploid
ENSG00000163930	BAP1	BRCA1 associated protein-1 (ubiquitin carboxy-terminal hydrolase) [Source:HGNC Symbol;Acc:950]	ENSMMUG00000016982	BAP1	BRCA1 associated protein 1 [Source:HGNC Symbol;Acc:HGNC:950]	Diploid	Diploid
ENSG00000170482	SLC23A1	solute carrier family 23 (ascorbic acid transporter), member 1 [Source:HGNC Symbol;Acc:10974]	ENSMMUG00000001002	SLC23A1	solute carrier family 23 member 1 [Source:HGNC Symbol;Acc:HGNC:10974]	Diploid	Diploid
ENSG00000173698	GPR64	G protein-coupled receptor 64 [Source:HGNC Symbol;Acc:4516]	ENSMMUG00000020515	ADGRG2	adhesion G protein-coupled receptor G2 [Source:HGNC Symbol;Acc:HGNC:4516]	Diploid	Diploid
ENSG00000114650	SCAP	SREBF chaperone [Source:HGNC Symbol;Acc:30634]	ENSMMUG00000014046	SCAP	SREBF chaperone [Source:HGNC Symbol;Acc:HGNC:30634]	Diploid	Diploid
ENSG00000133328	HRASLS2	HRAS-like suppressor 2 [Source:HGNC Symbol;Acc:17824]	ENSMMUG00000018314	HRASLS2	HRAS like suppressor 2 [Source:HGNC Symbol;Acc:HGNC:17824]	Diploid	Diploid
ENSG00000144035	NAT8	N-acetyltransferase 8 (GCN5-related, putative) [Source:HGNC Symbol;Acc:18069]	ENSMMUG00000048536	NAT8	N-acetyltransferase 8 (putative) [Source:HGNC Symbol;Acc:HGNC:18069]	Duplicated and fixed as a whole	Diploid
ENSG00000186767	SPIN4	spindlin family, member 4 [Source:HGNC Symbol;Acc:27040]	ENSMMUG00000007057	SPIN4	spindlin family member 4 [Source:HGNC Symbol;Acc:HGNC:27040]	Diploid	Diploid
ENSG00000158805	ZNF276	zinc finger protein 276 [Source:HGNC Symbol;Acc:23330]	ENSMMUG00000002506	ZNF276	zinc finger protein 276 [Source:HGNC Symbol;Acc:HGNC:23330]	Diploid	Diploid
ENSG00000147234	FRMPD3	FERM and PDZ domain containing 3 [Source:HGNC Symbol;Acc:29382]	ENSMMUG00000022293	FRMPD3	FERM and PDZ domain containing 3 [Source:HGNC Symbol;Acc:HGNC:29382]	Diploid	Diploid
ENSG00000079999	KEAP1	kelch-like ECH-associated protein 1 [Source:HGNC Symbol;Acc:23177]	ENSMMUG00000005218	KEAP1	kelch like ECH associated protein 1 [Source:HGNC Symbol;Acc:HGNC:23177]	Diploid	Diploid
ENSG00000213689	TREX1	three prime repair exonuclease 1 [Source:HGNC Symbol;Acc:12269]	ENSMMUG00000043955	TREX1	three prime repair exonuclease 1 [Source:HGNC Symbol;Acc:HGNC:12269]	Diploid	Diploid
ENSG00000144034	TPRKB	TP53RK binding protein [Source:HGNC Symbol;Acc:24259]	ENSMMUG00000030805	TPRKB	TP53RK binding protein [Source:HGNC Symbol;Acc:HGNC:24259]	Diploid	Diploid
ENSG00000187678	SPRY4	sprouty homolog 4 (Drosophila) [Source:HGNC Symbol;Acc:15533]	ENSMMUG00000014175	SPRY4	sprouty RTK signaling antagonist 4 [Source:HGNC Symbol;Acc:HGNC:15533]	Diploid	Diploid
ENSG00000015475	BID	BH3 interacting domain death agonist [Source:HGNC Symbol;Acc:1050]	ENSMMUG00000020799	BID	BH3 interacting domain death agonist [Source:HGNC Symbol;Acc:HGNC:1050]	Diploid	Diploid
ENSG00000100249	C22orf31	chromosome 22 open reading frame 31 [Source:HGNC Symbol;Acc:26931]	ENSMMUG00000021369	C22orf31	chromosome 22 open reading frame 31 [Source:HGNC Symbol;Acc:HGNC:26931]	Diploid	Diploid
[truncated: 6,527 more rows]

## Sheet: All one-to-one orthologous pair
Human Ensembl ID	Human Gene	Human Gene Description	Rhesus Ensembl ID	Rhesus Gene	Rhesus Gene Description	Human Copy-number Profile	Rhesus Copy-number Profile
ENSG00000198763	MT-ND2	mitochondrially encoded NADH dehydrogenase 2 [Source:HGNC Symbol;Acc:7456]	ENSMMUG00000028695	ND2	NADH dehydrogenase subunit 2 (mitochondrion) [Source:RefSeq peptide;Acc:YP_026105]	Diploid	Diploid
[truncated: 14,403 more rows]
